# Supplementary material for: Distinct kinematics and micromorphology for symmetrical rowing and sliding on water in ripple bugs and water striders
Source: Sci Rep. 2025 Dec 29;15:44777. doi: 10.1038/s41598-025-28453-0 (PMC12749290; doi:10.1038/s41598-025-28453-0)
Supplement: Supplementary file 1 — Supplementary Material 1 [file 41598_2025_28453_MOESM1_ESM.xlsx]

## Sheet: C0030
			RAW COORDINATES																				SPLINE																				mm
			HEAD		TAIL		LEFT COXAE		LEFT FT		LEFT TT		LEFT TIP		RIGHT COXAE		RIGHT FT		RIGHT TT		RIGHT TIP		HEAD		TAIL		LEFT COXAE		LEFT FT		LEFT TT		LEFT TIP		RIGHT COXAE		RIGHT FT		RIGHT TT		RIGHT TIP		HEAD		TAIL		LEFT COXAE		LEFT FT
SCALE		Frame	X	Y	X	Y	X	Y	X	Y	X	Y	X	Y	X	Y	X	Y	X	Y	X	Y	X	Y	X	Y	X	Y	X	Y	X	Y	X	Y	X	Y	X	Y	X	Y	X	Y	X	Y	X	Y	X	Y	X
X	Y	-2	-425.495	-22.2772	-356.031	-122.845	-404.055	-78.4481	-479	-84	-529.5	-91.5	-576.771	-98.5204	-379.166	-63.6406	-358.5	10	-335	66.5	-320.541	101.264	-424.999	-22.9894	-355.857	-123.088	-404.177	-78.4975	-479.479	-83.7252	-532.801	-92.9679	-576.875	-100.331	-378.98	-63.4768	-358.635	9.53349	-334.483	68.1169	-321.003	100.937	-35.7567	-1.93417	-29.9395	-10.3558	-34.0048	-6.60426	-40.3402
678.438	194.547	-1	-425.495	-22.2772	-356.031	-122.845	-404.055	-78.4481	-479	-84	-529.5	-91.5	-576.771	-98.5204	-379.166	-63.6406	-358.5	10	-335	66.5	-320.541	101.264	-424.999	-22.9894	-355.857	-123.088	-404.177	-78.4975	-479.479	-83.7252	-532.801	-92.9679	-576.875	-100.331	-378.98	-63.4768	-358.635	9.53349	-334.483	68.1169	-321.003	100.937	-35.7567	-1.93417	-29.9395	-10.3558	-34.0048	-6.60426	-40.3402
677.023	75.6964	0	-425.495	-22.2772	-356.031	-122.845	-404.055	-78.4481	-479	-84	-529.5	-91.5	-576.771	-98.5204	-379.166	-63.6406	-358.5	10	-335	66.5	-320.541	101.264	-424.999	-22.9894	-355.857	-123.088	-404.177	-78.4975	-479.479	-83.7252	-532.801	-92.9679	-576.875	-100.331	-378.98	-63.4768	-358.635	9.53349	-334.483	68.1169	-321.003	100.937	-35.7567	-1.93417	-29.9395	-10.3558	-34.0048	-6.60426	-40.3402
		1	-425.495	-22.2772	-356.031	-122.845	-404.055	-78.4481	-479	-84	-529.5	-91.5	-576.771	-98.5204	-379.166	-63.6406	-358.5	10	-335	66.5	-320.541	101.264	-424.999	-22.9894	-355.857	-123.088	-404.177	-78.4975	-479.479	-83.7252	-532.801	-92.9679	-576.875	-100.331	-378.98	-63.4768	-358.635	9.53349	-334.483	68.1169	-321.003	100.937	-35.7567	-1.93417	-29.9395	-10.3558	-34.0048	-6.60426	-40.3402
DISTANCE (mm)		2	-424.604	-23.6139	-355.634	-123.241	-404.37	-78.4481	-480	-83.5	-538	-96.5	-576.45	-105.118	-378.851	-63.3256	-358.5	9	-334	68	-320.593	100.286	-425.391	-22.8403	-355.745	-123.246	-404.248	-78.5925	-480.024	-83.9744	-533.623	-94.3205	-577.06	-102.531	-378.959	-63.2745	-358.405	9.11323	-334.473	66.5993	-320.407	100.358	-35.7896	-1.92164	-29.93	-10.3691	-34.0108	-6.61226	-40.3861
pixel	mm	3	-425.941	-22.7228	-355.634	-123.638	-404.37	-79.0782	-481.5	-84.5	-535	-95.5	-578.318	-104.407	-378.536	-62.6954	-358	8.5	-334	67	-320.483	99.9467	-425.899	-22.5057	-355.682	-123.326	-404.287	-78.6642	-480.416	-84.2859	-533.626	-95.3215	-577.18	-104.291	-378.991	-63.127	-358.137	8.83538	-334.603	64.6414	-319.675	99.8801	-35.8323	-1.89348	-29.9248	-10.3758	-34.0141	-6.61829	-40.4191
118.859	10	4	-426.386	-22.2772	-355.634	-123.241	-404.37	-78.4481	-480.5	-85	-531.5	-95	-577.496	-104.019	-379.481	-63.0105	-358	8	-335	61.5	-318.961	98.8074	-426.474	-21.9755	-355.693	-123.267	-404.292	-78.6804	-480.553	-84.6327	-532.994	-96.0913	-577.101	-105.729	-379.082	-63.0771	-357.806	8.80058	-334.879	62.2253	-318.75	99.59	-35.8807	-1.84888	-29.9257	-10.3709	-34.0145	-6.61965	-40.4306
1	0.0841334	5	-427.277	-20.9406	-355.634	-123.241	-404.055	-78.7631	-480	-84.5	-530	-97	-575.892	-108.473	-378.851	-63.0105	-357.5	9.5	-335	59	-316.598	99.4836	-427.029	-21.3429	-355.78	-123.071	-404.289	-78.6769	-480.559	-85.0276	-532.355	-96.8459	-576.917	-107.031	-379.159	-63.0753	-357.373	8.9899	-335.161	59.8692	-317.771	99.5454	-35.9274	-1.79565	-29.933	-10.3544	-34.0142	-6.61936	-40.431
		6	-427.723	-20.495	-356.428	-122.448	-404.37	-78.4481	-480	-85.5	-534.5	-98.5	-576.146	-108.434	-379.796	-63.3256	-356.5	10	-336	57	-316.983	100.6	-427.476	-20.7551	-355.926	-122.762	-404.311	-78.6667	-480.575	-85.5447	-531.967	-97.5871	-576.815	-108.103	-379.19	-63.0314	-356.841	9.22371	-335.295	58.0164	-316.902	99.6373	-35.965	-1.7462	-29.9453	-10.3284	-34.0161	-6.6185	-40.4324
LENGTH (mm)		7	-428.168	-20.495	-355.634	-122.448	-404.37	-78.7631	-480.5	-86.5	-530	-98	-576.779	-108.868	-379.166	-63.0105	-356	8.5	-334.5	56.5	-315.595	98.7075	-427.785	-20.2763	-356.104	-122.38	-404.352	-78.6572	-480.59	-86.163	-531.646	-98.3401	-576.749	-109.086	-379.133	-62.8538	-356.231	9.42939	-335.136	56.8334	-316.071	99.7535	-35.991	-1.70591	-29.9602	-10.2963	-34.0195	-6.6177	-40.4337
Body	10.2675	8	-427.277	-19.604	-356.428	-122.051	-404.37	-78.4481	-482.5	-87	-530.5	-98.5	-578.623	-110.029	-378.536	-62.6954	-356	10.5	-335.5	55	-314.643	100.275	-428.014	-19.9055	-356.361	-121.912	-404.404	-78.6194	-480.438	-86.8423	-531.531	-99.314	-576.477	-110.254	-379.058	-62.518	-355.485	9.67691	-334.648	56.2074	-315.138	99.9273	-36.0103	-1.67472	-29.9819	-10.2569	-34.0239	-6.61452	-40.4209
R. Femur	6.36399	9	-428.168	-19.604	-356.031	-121.654	-404.685	-78.7631	-479	-87.5	-533	-100.5	-575.098	-110.635	-379.166	-62.0653	-355	8.5	-334	57	-315.725	99.2056	-428.275	-19.6588	-356.676	-121.35	-404.465	-78.5264	-480.011	-87.6197	-531.492	-100.651	-575.843	-111.841	-379.047	-62.0579	-354.507	9.92361	-333.74	55.8371	-313.841	100.039	-36.0322	-1.65396	-30.0084	-10.2096	-34.0291	-6.60669	-40.3849
R. Tibia	6.23768	10	-429.059	-19.1584	-358.015	-120.463	-404.37	-78.133	-479	-88.5	-532.5	-103.5	-574.173	-115.184	-379.166	-61.4352	-353	11	-332.5	55.5	-311.643	100.775	-428.539	-19.4967	-356.981	-120.735	-404.54	-78.3329	-479.581	-88.5772	-531.173	-102.294	-575.109	-113.957	-379.08	-61.5536	-353.324	10.177	-332.483	55.2086	-311.885	99.9451	-36.0544	-1.64032	-30.0341	-10.1579	-34.0353	-6.59041	-40.3488
R. Tarsus	2.41323	11	-428.614	-20.0495	-357.222	-119.669	-404.685	-78.133	-479.5	-89.5	-529.5	-103	-574.926	-115.265	-379.481	-61.1202	-351	11	-330.5	54.5	-308.863	100.412	-428.743	-19.3341	-357.131	-120.165	-404.666	-78.0242	-479.284	-89.7758	-530.553	-104.176	-574.442	-116.513	-379.138	-61.0901	-352.077	10.2295	-331.049	54.0067	-309.337	99.3848	-36.0716	-1.62664	-30.0467	-10.1099	-34.0459	-6.56445	-40.3238
L. Femur	7.06375	12	-429.059	-18.7129	-357.222	-120.066	-405	-77.818	-479	-91	-529.5	-106.5	-573.493	-120.003	-378.851	-59.86	-352	9.5	-329	53	-305.799	96.8809	-428.922	-19.0494	-357.17	-119.669	-404.86	-77.5617	-479.091	-91.239	-529.917	-106.413	-573.797	-119.544	-379.245	-60.7291	-350.81	10.0138	-329.599	52.0654	-306.288	98.2853	-36.0867	-1.60269	-30.0499	-10.0682	-34.0622	-6.52553	-40.3075
L. Tibia	7.06274	13	-429.505	-18.7129	-356.825	-118.875	-404.685	-77.1879	-479	-92.5	-529.5	-109	-572.955	-123.198	-379.796	-60.4901	-349	10	-328.5	50	-303.918	97.9639	-429.118	-18.6368	-357.219	-119.18	-405.14	-76.9325	-478.983	-92.9152	-529.375	-108.944	-573.167	-122.916	-379.48	-60.4865	-349.38	9.64224	-328.147	49.3884	-302.689	96.7613	-36.1032	-1.56798	-30.054	-10.027	-34.0858	-6.4726	-40.2984
L. Tarsus	2.42391	14	-428.614	-18.2673	-357.619	-118.875	-405.945	-75.9277	-479	-95.5	-529.5	-112	-572.955	-126.198	-379.166	-60.8051	-348	9.5	-327	46	-298.707	95.1752	-429.417	-18.0612	-357.393	-118.671	-405.531	-76.1978	-478.933	-94.6655	-528.9	-111.664	-572.492	-126.537	-379.876	-60.1954	-347.823	9.17803	-326.566	46.2364	-298.426	94.7472	-36.1283	-1.51955	-30.0687	-9.9842	-34.1188	-6.41078	-40.2943
		15	-429.95	-17.3762	-357.222	-118.479	-405.63	-74.6674	-479	-96.5	-528	-114.5	-571.781	-130.583	-380.741	-60.175	-346.5	7.5	-324	42.5	-293.05	90.6449	-429.95	-17.2966	-357.74	-118.082	-405.993	-75.4719	-478.919	-96.2943	-528.5	-114.503	-571.679	-130.383	-380.471	-59.6761	-346.164	8.75008	-324.799	43.0367	-293.638	92.3811	-36.1732	-1.45522	-30.0979	-9.93467	-34.1576	-6.34971	-40.2931
mg	19.1	16	-430.396	-16.0396	-358.809	-116.891	-406.89	-75.2975	-479	-98	-528.5	-117	-571.279	-133.42	-381.056	-58.5998	-344	8.5	-323.5	39.5	-289.479	90.9466	-430.699	-16.3691	-358.306	-117.403	-406.526	-74.7828	-478.936	-97.7719	-528.291	-117.465	-570.725	-134.381	-381.187	-58.9045	-344.466	8.50845	-322.857	40.1706	-288.554	89.8638	-36.2362	-1.37719	-30.1455	-9.87751	-34.2024	-6.29173	-40.2946
		17	-432.178	-15.1485	-358.809	-116.494	-407.205	-74.0373	-479	-98.5	-527	-121	-568.499	-140.452	-382.316	-57.9697	-342.5	8.5	-321	37.5	-283.633	87.902	-431.588	-15.3153	-359.065	-116.689	-407.098	-74.0009	-479.005	-99.1689	-528.324	-120.547	-569.704	-138.436	-381.956	-57.9792	-342.847	8.3544	-320.637	37.8574	-283.344	87.1073	-36.311	-1.28853	-30.2094	-9.81748	-34.2506	-6.22595	-40.3003
		18	-432.178	-14.703	-359.603	-116.494	-407.52	-73.0922	-478.5	-100	-528	-123	-568.139	-141.651	-382.631	-56.7095	-342	8.5	-317.5	36.5	-276.911	82.8872	-432.507	-14.0969	-360.058	-115.9	-407.74	-73.0649	-479.162	-100.58	-528.6	-123.669	-568.747	-142.363	-382.716	-56.9594	-341.325	8.12896	-318.149	36.1266	-278.359	84.2039	-36.3883	-1.18602	-30.2929	-9.75108	-34.3046	-6.1472	-40.3135
		19	-433.96	-12.4752	-361.588	-114.509	-408.466	-72.147	-479	-102.5	-530.5	-127.5	-567.92	-145.665	-383.891	-56.0793	-339.5	8	-315	35	-273.078	81.1994	-433.438	-12.6552	-361.275	-114.957	-408.512	-71.9501	-479.413	-101.937	-528.818	-126.791	-567.728	-146.317	-383.471	-55.8733	-339.855	7.72326	-315.483	34.9161	-273.982	81.402	-36.4666	-1.06472	-30.3953	-9.67171	-34.3695	-6.05341	-40.3347
		20	-434.406	-11.1386	-362.778	-114.112	-409.096	-70.5718	-481	-104.5	-529	-130	-568.29	-150.873	-383.891	-54.5041	-338.5	7	-314.5	32.5	-270.756	78.9777	-434.353	-11.0415	-362.611	-113.872	-409.431	-70.6501	-479.6	-103.047	-528.567	-129.788	-566.338	-150.375	-384.247	-54.7063	-338.499	7.12954	-312.582	34.2289	-270.259	78.702	-36.5436	-0.928963	-30.5077	-9.58048	-34.4468	-5.94403	-40.3504
		21	-435.297	-8.91089	-363.969	-112.525	-410.986	-69.3116	-480	-103	-528	-132	-564.602	-154.113	-385.152	-53.874	-337.5	6	-309	33.5	-266.37	74.6337	-435.32	-9.30648	-364.011	-112.61	-410.477	-69.1972	-479.516	-103.881	-527.786	-132.665	-564.381	-154.465	-385.138	-53.4636	-337.28	6.41157	-309.354	34.0138	-266.99	76.0061	-36.625	-0.782986	-30.6255	-9.47423	-34.5348	-5.8218	-40.3433
		22	-435.743	-8.0198	-365.557	-111.334	-411.931	-67.4212	-478.5	-104	-526.5	-136	-560.743	-158.828	-386.097	-51.9837	-336	6	-304.5	37	-265.55	75.3314	-436.445	-7.4906	-365.474	-111.154	-411.58	-67.624	-479.256	-104.699	-526.605	-135.471	-562.094	-158.564	-386.184	-52.1402	-336.214	5.59848	-306.07	33.8299	-264.003	73.1916	-36.7196	-0.63021	-30.7486	-9.35173	-34.6276	-5.68944	-40.3214
		23	-437.525	-5.34653	-366.748	-109.35	-411.931	-66.161	-478	-105	-524.5	-137.5	-559.017	-161.624	-387.042	-50.4084	-335.5	4.5	-303	32.5	-260.615	69.0159	-437.794	-5.58369	-366.998	-109.494	-412.781	-65.9721	-479.051	-105.617	-525.217	-138.157	-559.796	-162.619	-387.404	-50.7991	-335.352	4.64642	-302.945	33.2034	-261.103	69.9724	-36.8331	-0.469775	-30.8768	-9.2121	-34.7287	-5.55046	-40.3042
		24	-439.752	-3.56436	-368.732	-108.159	-414.137	-64.2707	-479.5	-107.5	-523.5	-141	-558.144	-167.376	-388.932	-49.4632	-334	4.5	-300	32	-257.148	66.6595	-439.269	-3.6544	-368.588	-107.646	-414.179	-64.2565	-478.943	-106.523	-523.767	-140.712	-557.488	-166.559	-388.783	-49.4711	-334.718	3.56728	-299.844	32.2692	-258.362	66.3934	-36.9572	-0.307457	-31.0105	-9.05666	-34.8463	-5.40612	-40.2951
		25	-440.644	-1.78218	-370.717	-105.38	-416.027	-62.0653	-479	-107	-522	-143.5	-554.356	-170.965	-390.508	-47.888	-334.5	1.5	-297	31	-256.814	62.6133	-440.701	-1.74426	-370.204	-105.633	-415.705	-62.522	-478.738	-107.189	-522.227	-143.032	-554.969	-170.161	-390.229	-48.0956	-334.319	2.41242	-296.57	31.1663	-255.769	62.4238	-37.0777	-0.14675	-31.1465	-8.88723	-34.9747	-5.26019	-40.2778
		26	-442.871	0.445545	-371.114	-103.396	-417.287	-60.8051	-478	-107.5	-521.5	-145.5	-552.44	-172.528	-391.768	-46.9428	-334	1.5	-294.5	29.5	-253.362	58.6615	-441.991	0.127751	-371.869	-103.566	-417.255	-60.8024	-478.327	-107.551	-520.439	-145.053	-552.096	-173.383	-391.678	-46.5702	-334.029	1.37234	-292.948	29.9406	-253.077	58.0345	-37.1862	0.0107481	-31.2866	-8.71336	-35.1051	-5.11552	-40.2433
		27	-442.871	1.78218	-373.892	-101.411	-419.177	-59.2299	-479	-108	-519	-146.5	-550.215	-176.545	-393.343	-45.3676	-334	0	-289	28.5	-250.495	52.8863	-443.173	1.98448	-373.616	-101.509	-418.795	-59.0356	-477.64	-107.55	-518.334	-146.89	-548.679	-176.276	-393.143	-44.8008	-333.716	0.511422	-289.125	28.5257	-250.239	53.3399	-37.2857	0.166961	-31.4336	-8.54032	-35.2347	-4.96687	-40.1855
		28	-444.208	4.0099	-375.48	-99.4267	-420.123	-57.6546	-476.5	-108	-515.5	-149	-544.624	-179.618	-394.288	-42.8471	-333	0.5	-284	27.5	-246.429	48.2023	-444.337	3.86121	-375.459	-99.4931	-420.332	-57.1456	-476.667	-107.138	-515.949	-148.694	-544.605	-178.882	-394.672	-42.7416	-333.273	-0.171374	-285.386	26.81	-247.295	48.4902	-37.3836	0.324857	-31.5887	-8.3707	-35.3639	-4.80786	-40.1036
		29	-445.545	5.79208	-377.464	-97.4421	-421.698	-54.5041	-475	-106.5	-512.5	-149.5	-539.966	-180.994	-396.179	-40.3267	-333.5	-1	-282	24.5	-244.921	42.8597	-445.622	5.8031	-377.365	-97.5001	-421.945	-55.1254	-475.631	-106.401	-513.589	-150.617	-540.137	-181.217	-396.345	-40.5259	-332.632	-0.731951	-282.137	24.651	-244.339	43.6124	-37.4917	0.488235	-31.749	-8.20301	-35.4997	-4.63789	-40.0165
		30	-446.881	7.57426	-379.052	-95.0606	-423.903	-52.9288	-475	-105	-512	-152.5	-535.741	-182.978	-398.069	-37.4912	-332.5	-1.5	-279.5	23	-242.779	39.9748	-447.103	7.86857	-379.343	-95.4937	-423.679	-53.0531	-474.766	-105.637	-511.418	-152.784	-535.605	-183.471	-398.164	-38.3204	-331.731	-1.12779	-279.439	22.0529	-241.317	38.6949	-37.6163	0.662009	-31.9154	-8.03421	-35.6456	-4.46354	-39.9437
		31	-448.663	10.2475	-381.433	-93.8699	-425.163	-51.3536	-473.5	-103.5	-508.5	-155.5	-528.692	-185.499	-400.589	-36.231	-330.5	-1.5	-277	18.5	-237.915	33.1114	-448.82	10.106	-381.406	-93.3991	-425.524	-50.8954	-474.175	-105.176	-509.376	-155.084	-531.311	-185.806	-400.068	-36.2112	-330.716	-1.35743	-277.257	19.0744	-238.328	33.6186	-37.7608	0.850251	-32.089	-7.85799	-35.8008	-4.282	-39.8939
		32	-450.446	12.4752	-383.418	-91.8853	-427.369	-48.5181	-473	-105.5	-507	-156.5	-527.828	-187.743	-401.849	-34.6558	-329	-1.5	-275	15.5	-234.718	28.1812	-450.751	12.5082	-383.515	-91.0712	-427.485	-48.5838	-473.942	-105.133	-507.422	-157.31	-527.441	-188.246	-401.994	-34.0989	-329.933	-1.52016	-275.546	15.9372	-235.793	28.4697	-37.9233	1.05235	-32.2664	-7.66213	-35.9658	-4.08752	-39.8743
		33	-453.119	14.703	-386.196	-87.9162	-429.889	-45.9977	-474.5	-105.5	-506.5	-159	-525.238	-190.327	-403.74	-31.5053	-329	-1.5	-275.5	12.5	-233.377	23.523	-452.816	15.0806	-385.614	-88.4851	-429.5	-46.1373	-473.97	-105.249	-505.338	-159.284	-523.65	-190.699	-403.978	-31.8741	-329.673	-1.76419	-274.182	12.7676	-234.065	23.2789	-38.097	1.26878	-32.443	-7.44455	-36.1353	-3.88169	-39.8767
		34	-455.347	18.2673	-387.784	-85.9316	-431.464	-44.1074	-475	-105	-503	-162.5	-518.274	-193.867	-405.945	-29.93	-330	-1.5	-273.5	9	-232.821	16.5599	-454.876	17.8094	-387.66	-85.7833	-431.48	-43.5775	-473.956	-105.269	-502.831	-160.663	-519.621	-192.931	-406.04	-29.5268	-329.981	-2.22699	-272.98	9.55488	-233.212	18.0021	-38.2702	1.49837	-32.6152	-7.21724	-36.3018	-3.66632	-39.8756
		35	-457.25	20.8644	-388.975	-82.3594	-433.355	-40.6418	-474	-107	-500.5	-161.5	-517.223	-195.892	-408.781	-26.7795	-331	-3.5	-273.5	7.5	-233.917	15.0724	-456.864	20.6229	-389.735	-83.0387	-433.412	-40.9212	-473.713	-104.998	-499.843	-161.1	-515.323	-194.651	-408.137	-27.0199	-330.712	-2.9504	-272.036	6.17884	-233.074	12.5551	-38.4375	1.73508	-32.7898	-6.98633	-36.4645	-3.44284	-39.8551
		36	-457.957	22.9862	-392.15	-81.1687	-435.875	-37.8063	-472.5	-103	-496.5	-161	-510.293	-194.333	-410.041	-24.8891	-333	-3	-270	3	-234.602	6.37124	-458.852	23.5395	-391.937	-80.2897	-435.301	-38.2753	-473.32	-104.302	-496.445	-160.642	-510.625	-195.813	-410.228	-24.3694	-331.705	-3.83705	-271.7	2.4573	-233.422	6.69383	-38.6048	1.98046	-32.975	-6.75504	-36.6233	-3.22023	-39.822
		37	-461.213	26.3947	-394.135	-76.8026	-436.82	-35.6009	-473	-103	-492	-159.5	-504.506	-196.688	-411.931	-21.1085	-332.5	-4.5	-270.5	-1	-233.814	1.07099	-460.969	26.6237	-394.221	-77.4846	-437.164	-35.6908	-472.927	-103.388	-492.862	-159.538	-505.708	-196.607	-412.391	-21.589	-332.928	-4.82347	-272.574	-1.51211	-234.242	0.615114	-38.7829	2.23995	-33.1672	-6.51904	-36.7801	-3.00279	-39.7889
		38	-462.8	29.9669	-396.913	-74.8181	-438.711	-33.3956	-473	-102	-490	-157	-502.189	-196.435	-414.767	-19.2182	-334	-6.5	-276	-6.5	-235.157	-6.5	-463.19	29.8235	-396.542	-74.6864	-439.123	-33.0993	-472.531	-102.273	-489.319	-158.131	-500.723	-196.976	-414.677	-18.765	-334.619	-5.68047	-274.864	-5.41955	-235.797	-5.3953	-38.9697	2.50915	-33.3625	-6.28362	-36.9449	-2.78476	-39.7556
		39	-465.976	33.5391	-398.501	-71.6428	-441.231	-30.8751	-472.5	-101.5	-485.5	-156.5	-495.236	-197.693	-416.972	-15.1225	-336	-6.5	-278	-9.5	-237.289	-11.6058	-465.47	33.0162	-398.868	-71.867	-441.234	-30.4045	-472.126	-100.807	-485.898	-156.715	-495.623	-196.777	-417.033	-15.9327	-336.958	-6.10925	-278.306	-8.8749	-238.284	-11.0304	-39.1616	2.77777	-33.5581	-6.04642	-37.1225	-2.55804	-39.7215
		40	-467.96	35.9206	-400.882	-69.6582	-443.751	-27.0945	-471.5	-99.5	-483	-156	-491.214	-196.357	-419.177	-13.5473	-339.5	-7	-281	-12	-241.016	-15.4175	-467.725	36.1254	-401.22	-68.978	-443.446	-27.593	-471.827	-98.8002	-482.757	-155.333	-490.588	-195.801	-419.397	-13.1557	-339.922	-5.98854	-282.753	-11.7234	-241.692	-16.2242	-39.3513	3.03935	-33.756	-5.80336	-37.3087	-2.32149	-39.6964
		41	-469.548	39.4928	-404.057	-65.6891	-445.327	-24.8891	-471	-96	-479	-153	-484.738	-193.884	-422.643	-10.0817	-345	-4	-287	-13.5	-247.456	-19.977	-469.967	39.1824	-403.545	-65.9666	-445.704	-24.7406	-471.84	-96.2308	-480.019	-153.955	-485.829	-194.037	-421.687	-10.3701	-343.229	-5.37693	-287.96	-14.0148	-245.728	-21.0483	-39.5399	3.29655	-33.9516	-5.54999	-37.4986	-2.08151	-39.6975
		42	-472.326	41.8743	-406.439	-62.5138	-448.162	-21.7386	-472.5	-93	-478	-153.5	-481.449	-191.437	-423.588	-7.87631	-346.5	-4	-295	-16	-250.235	-26.4306	-472.265	42.2191	-405.724	-62.8976	-447.996	-21.8501	-472.273	-93.2509	-477.787	-152.632	-481.607	-191.631	-423.822	-7.53708	-346.551	-4.49555	-293.24	-15.8635	-249.992	-25.377	-39.7333	3.55204	-34.135	-5.29179	-37.6914	-1.83833	-39.7339
		43	-474.311	44.6527	-407.63	-60.1323	-450.683	-18.9032	-473.5	-90	-476.5	-151	-478.355	-188.724	-426.109	-4.72579	-348.5	-4.5	-301	-17	-252.911	-29.655	-474.613	45.3042	-407.768	-59.7929	-450.254	-18.9236	-473.052	-89.987	-475.966	-151.293	-477.982	-188.715	-425.901	-4.59528	-349.911	-3.30051	-297.706	-17.2962	-254.431	-28.8702	-39.9309	3.8116	-34.3069	-5.03058	-37.8814	-1.5921	-39.7995
		44	-477.089	49.0187	-408.82	-56.957	-452.258	-16.3827	-474	-87.5	-474	-148.5	-474	-186.343	-427.369	-1.26021	-353.5	-1	-300.5	-19	-259.907	-32.7863	-476.982	48.4152	-409.859	-56.5959	-452.451	-15.946	-474.131	-86.5008	-474.485	-149.985	-474.939	-185.375	-428.033	-1.54695	-353.34	-1.63335	-300.968	-18.3259	-259.054	-31.3965	-40.1301	4.07333	-34.4828	-4.76161	-38.0662	-1.34159	-39.8903
		45	-479.868	52.194	-412.393	-52.9879	-454.463	-12.6021	-475	-83	-473.5	-148.5	-472.737	-181.817	-430.204	1.26021	-358	0	-304	-18	-264.229	-31.257	-479.284	51.4049	-412.131	-53.3209	-454.646	-12.9154	-475.563	-82.8966	-473.371	-148.661	-472.484	-181.737	-430.326	1.57515	-356.574	0.469514	-303.4	-18.9457	-263.603	-33.1199	-40.3238	4.32487	-34.674	-4.48607	-38.251	-1.08662	-40.0108
		46	-481.852	53.7817	-414.377	-50.2095	-456.984	-9.45158	-477.5	-77	-472.5	-149	-470.652	-175.606	-433.04	4.72579	-359.5	3	-304	-19	-267.613	-33.4239	-481.472	54.2616	-414.506	-50.0594	-456.873	-9.90494	-477.368	-79.4966	-472.582	-146.934	-470.458	-178.139	-432.748	4.77556	-359.386	3.01778	-305.487	-19.2258	-267.958	-34.4429	-40.5079	4.56521	-34.8738	-4.21167	-38.4383	-0.833336	-40.1626
		47	-482.646	56.957	-417.552	-46.2404	-458.874	-7.24621	-480	-77	-472.5	-144.5	-469.085	-175.239	-435.245	8.19137	-361.5	5.5	-306.5	-20.5	-272.139	-36.7436	-483.648	57.1477	-416.899	-46.859	-459.121	-6.92016	-479.447	-76.5662	-472.074	-144.415	-468.715	-174.851	-435.226	8.0045	-361.865	5.95406	-307.736	-19.0595	-272.155	-35.3918	-40.691	4.80803	-35.0752	-3.94241	-38.6274	-0.582217	-40.3375
		48	-486.218	59.7354	-418.743	-44.2558	-461.709	-4.41074	-482	-74.5	-471.5	-141	-466.584	-172.134	-437.765	11.0268	-364	9.5	-310	-18	-275.92	-35.3553	-485.972	60.1553	-419.246	-43.7489	-461.379	-3.87119	-481.725	-73.8687	-471.817	-141.146	-467.185	-171.633	-437.738	11.1949	-364.18	9.16831	-310.305	-18.3184	-276.191	-35.7498	-40.8865	5.06107	-35.2726	-3.68075	-38.8174	-0.325697	-40.5292
		49	-487.806	63.3076	-421.918	-40.6836	-463.285	-0.315053	-484	-72.5	-472	-137.5	-466.055	-169.701	-439.971	14.8075	-367	13.5	-314.5	-17	-281.533	-36.1524	-488.424	63.2885	-421.587	-40.6617	-463.61	-0.741882	-484.271	-71.1613	-471.846	-137.294	-465.854	-168.217	-440.288	14.3076	-366.42	12.4707	-312.993	-17.1511	-280.025	-35.5119	-41.0928	5.32468	-35.4695	-3.42101	-39.0051	-0.062417	-40.7434
		50	-491.775	66.8798	-423.506	-37.5083	-466.12	2.52042	-486.5	-66.5	-472	-132.5	-465.29	-163.041	-443.436	17.3279	-368	15	-315	-16	-282.68	-34.9043	-490.952	66.453	-423.908	-37.6061	-465.813	2.3747	-487.224	-68.4286	-472.163	-133.005	-464.61	-164.543	-442.867	17.3046	-368.647	15.7723	-315.552	-15.7067	-283.64	-34.6952	-41.3054	5.59092	-35.6649	-3.16393	-39.1904	0.199792	-40.9918
		51	-493.363	69.6582	-426.681	-34.333	-468.011	5.35589	-490	-66.5	-472	-129	-462.645	-161.483	-445.012	19.8483	-370.5	19	-318.5	-13.5	-286.681	-33.3868	-493.428	69.5575	-426.212	-34.6219	-467.954	5.45694	-490.653	-65.8603	-472.79	-128.427	-463.403	-160.799	-445.439	20.2525	-371.01	19.1824	-317.998	-14.1114	-287.281	-33.4432	-41.5138	5.85211	-35.8586	-2.91286	-39.3705	0.459111	-41.2803
		52	-495.744	72.4366	-428.269	-31.9515	-469.901	8.50642	-495.5	-63.5	-474.5	-123	-462.603	-156.708	-448.162	23.3139	-374	23	-320	-12.5	-291.406	-31.2978	-495.862	72.6142	-428.487	-31.6944	-470.051	8.52463	-494.382	-63.3843	-473.626	-123.682	-462.244	-157.017	-448.019	23.2013	-373.491	22.6789	-320.37	-12.472	-291	-31.972	-41.7185	6.10928	-36.05	-2.66656	-39.547	0.717206	-41.594
[truncated: 198 more columns]

## Sheet: C0035
			RAW COORDINATES																				SPLINE																				mm
			HEAD		TAIL		LEFT COXAE		LEFT FT		LEFT TT		LEFT TIP		RIGHT COXAE		RIGHT FT		RIGHT TT		RIGHT TIP		HEAD		TAIL		LEFT COXAE		LEFT FT		LEFT TT		LEFT TIP		RIGHT COXAE		RIGHT FT		RIGHT TT		RIGHT TIP		HEAD		TAIL		LEFT COXAE		LEFT FT
SCALE		Frame	X	Y	X	Y	X	Y	X	Y	X	Y	X	Y	X	Y	X	Y	X	Y	X	Y	X	Y	X	Y	X	Y	X	Y	X	Y	X	Y	X	Y	X	Y	X	Y	X	Y	X	Y	X	Y	X	Y	X
X	Y	-2	490.165	-120.397	600.545	-77.5266	550.905	-114.794	526.284	-184.895	510.144	-266.032	506.999	-281.839	537.993	-83.484	471.903	-48.6267	402.845	1.6538	391.996	9.55244	490.091	-120.239	600.599	-77.6095	550.973	-114.804	526.162	-184.967	509.659	-266.416	506.519	-281.842	538.066	-83.4982	471.907	-48.612	402.839	1.57114	391.941	9.49137	41.233	-10.1161	50.5304	-6.52955	46.3553	-9.65885	44.2678
678.438	194.547	-1	490.165	-120.397	600.545	-77.5266	550.905	-114.794	526.284	-184.895	510.144	-266.032	506.999	-281.839	537.993	-83.484	471.903	-48.6267	402.845	1.6538	391.996	9.55244	490.091	-120.239	600.599	-77.6095	550.973	-114.804	526.162	-184.967	509.659	-266.416	506.519	-281.842	538.066	-83.4982	471.907	-48.612	402.839	1.57114	391.941	9.49137	41.233	-10.1161	50.5304	-6.52955	46.3553	-9.65885	44.2678
677.023	75.6964	0	490.165	-120.397	600.545	-77.5266	550.905	-114.794	526.284	-184.895	510.144	-266.032	506.999	-281.839	537.993	-83.484	471.903	-48.6267	402.845	1.6538	391.996	9.55244	490.091	-120.239	600.599	-77.6095	550.973	-114.804	526.162	-184.967	509.659	-266.416	506.519	-281.842	538.066	-83.4982	471.907	-48.612	402.839	1.57114	391.941	9.49137	41.233	-10.1161	50.5304	-6.52955	46.3553	-9.65885	44.2678
		1	490.165	-120.397	600.545	-77.5266	550.905	-114.794	526.284	-184.895	510.144	-266.032	506.999	-281.839	537.993	-83.484	471.903	-48.6267	402.845	1.6538	391.996	9.55244	490.091	-120.239	600.599	-77.6095	550.973	-114.804	526.162	-184.967	509.659	-266.416	506.519	-281.842	538.066	-83.4982	471.907	-48.612	402.839	1.57114	391.941	9.49137	41.233	-10.1161	50.5304	-6.52955	46.3553	-9.65885	44.2678
DISTANCE (mm)		2	489.768	-120	600.545	-77.6841	550.905	-114.794	526.681	-185.292	510.144	-266.478	506.952	-282.146	537.993	-83.484	471.903	-48.4864	402.845	1.45535	391.809	9.43568	489.781	-120.142	600.561	-77.6671	550.948	-114.805	526.616	-185.128	510.777	-265.686	507.551	-282.114	538.266	-83.5951	471.915	-48.5022	403.108	1.41941	391.909	9.54142	41.207	-10.108	50.5272	-6.5344	46.3532	-9.65891	44.306
pixel	mm	3	489.372	-120	600.545	-77.8416	550.905	-114.794	527.078	-185.292	512.371	-265.142	509.174	-282.5	538.787	-83.8809	472.044	-48.3461	403.638	1.25689	392.024	9.67874	489.497	-120.091	600.504	-77.6974	550.898	-114.801	527.117	-185.273	512.025	-264.871	508.714	-282.387	538.427	-83.6808	471.922	-48.3967	403.364	1.29798	391.891	9.60635	41.183	-10.1036	50.5224	-6.53695	46.3489	-9.65862	44.3481
118.859	10	4	489.173	-120.397	600.388	-77.6841	550.905	-114.794	527.674	-185.491	513.485	-263.36	509.955	-282.733	538.589	-83.6825	472.044	-48.3461	404.432	0.859978	392.125	9.8171	489.252	-120.093	600.407	-77.685	550.786	-114.786	527.721	-185.426	513.408	-264.079	510.027	-282.676	538.465	-83.7301	471.929	-48.293	403.55	1.24303	391.884	9.68099	41.1624	-10.1039	50.5143	-6.53591	46.3395	-9.65737	44.3989
1	0.0841334	5	488.975	-119.802	599.915	-77.6841	550.905	-114.794	528.666	-185.491	515.044	-263.137	511.586	-282.847	538.39	-83.6825	471.903	-47.9252	403.837	1.45535	391.897	10.1175	489.027	-120.147	600.258	-77.6485	550.583	-114.751	528.479	-185.628	514.978	-263.487	511.577	-283.025	538.372	-83.7547	471.971	-48.1793	403.705	1.26161	391.925	9.77847	41.1435	-10.1084	50.5018	-6.53283	46.3225	-9.65438	44.4627
		6	489.173	-120.397	600.545	-77.3691	550.014	-114.794	529.261	-185.888	517.049	-263.137	513.827	-283.518	537.993	-83.8809	471.933	-47.8252	403.837	1.45535	391.877	10.0175	488.776	-120.292	600.023	-77.6164	550.307	-114.689	529.44	-185.928	516.829	-263.102	513.46	-283.49	538.19	-83.7623	472.115	-48.0388	404.095	1.28205	392.11	9.96631	41.1224	-10.1206	50.482	-6.53013	46.2992	-9.64919	44.5436
LENGTH (mm)		7	488.181	-120.397	599.758	-77.6841	549.791	-114.571	530.65	-186.086	518.801	-262.908	515.583	-283.774	537.993	-83.8809	472.184	-47.9252	403.837	1.05843	391.843	9.65408	488.457	-120.515	599.616	-77.6112	550.037	-114.612	530.681	-186.346	519.085	-262.813	515.794	-284.089	537.96	-83.7485	472.407	-47.7874	405.048	1.26498	392.532	10.4001	41.0955	-10.1394	50.4478	-6.5297	46.2765	-9.64267	44.648
Body	10.2675	8	487.982	-120.992	598.813	-77.6841	549.926	-114.461	532.04	-187.078	521.817	-262.432	518.752	-285.024	537.398	-83.484	472.886	-47.5042	406.5	1.05843	393.109	10.8542	488.101	-120.798	599.063	-77.6054	549.791	-114.553	532.249	-186.867	521.909	-262.5	518.765	-284.82	537.682	-83.7393	472.832	-47.2857	406.775	1.20982	393.188	11.2239	41.0656	-10.1632	50.4012	-6.52921	46.2558	-9.63772	44.7799
R. Femur	6.36399	9	487.784	-121.191	597.868	-77.5266	549.396	-114.637	534.223	-187.475	524.999	-261.725	522.038	-285.565	537.596	-83.484	473.554	-46.5739	409.5	1.05843	394.237	12.4083	487.694	-121.115	598.434	-77.5782	549.521	-114.539	534.161	-187.43	525.408	-262.066	522.535	-285.621	537.336	-83.7829	473.323	-46.4259	409.179	1.07011	393.899	12.3935	41.0313	-10.1898	50.3483	-6.52692	46.2331	-9.63652	44.9408
R. Tibia	6.23768	10	486.99	-121.389	597.868	-77.6841	549.219	-114.284	536.406	-188.071	529.065	-261.195	526.533	-286.42	536.406	-84.2778	474.173	-45.4248	412.5	1.05843	395.239	14.0685	487.18	-121.48	597.721	-77.5283	549.189	-114.577	536.389	-188.008	529.625	-261.382	527.218	-286.457	536.855	-83.8602	473.819	-45.1666	412.048	0.752463	394.451	13.7388	40.9881	-10.2205	50.2883	-6.52272	46.2052	-9.63973	45.1282
R. Tarsus	2.41323	11	486.792	-121.786	597.395	-77.3691	548.689	-114.991	538.589	-188.269	534.899	-260.488	533.546	-286.984	536.803	-84.2778	474.403	-43.8659	415.75	1.25689	396.061	16.404	486.51	-121.931	596.778	-77.4557	548.739	-114.676	538.907	-188.6	534.477	-260.228	532.78	-287.287	536.187	-83.8928	474.34	-43.5269	415.256	0.169599	394.745	15.0909	40.9317	-10.2584	50.209	-6.51661	46.1673	-9.6481	45.3401
L. Femur	7.06375	12	485.601	-122.58	595.505	-77.5266	548.158	-114.991	541.499	-189.194	539.673	-259.781	538.942	-288.004	535.215	-83.484	474.602	-41.2862	418.25	-0.25	394.699	16.8999	485.61	-122.481	595.497	-77.3882	548.11	-114.802	541.681	-189.205	539.75	-258.337	539.043	-288.044	535.231	-83.9027	475.001	-41.6127	418.826	-0.634785	394.958	16.4314	40.856	-10.3048	50.1012	-6.51094	46.1144	-9.65871	45.5734
L. Tibia	7.06274	13	484.41	-123.175	593.773	-77.3691	547.275	-114.991	544.729	-189.862	545.507	-256.422	545.884	-288.698	533.627	-84.0794	475.322	-39.3256	422.75	-2	394.726	17.8967	484.461	-123.113	593.919	-77.3506	547.236	-114.986	544.591	-189.745	545.292	-255.573	545.958	-288.586	533.998	-83.9994	475.929	-39.6033	422.884	-1.32966	395.596	18.0872	40.7593	-10.3579	49.9684	-6.50777	46.0408	-9.6742	45.8183
L. Tarsus	2.42391	14	482.822	-123.969	592.04	-77.3691	546.037	-114.991	547.624	-190.085	550.633	-252.179	552.409	-288.812	533.032	-84.0794	477.09	-37.7345	426.5	-2.5	395.98	18.7565	483.053	-123.823	592.115	-77.3953	546.06	-115.321	547.469	-190.133	550.971	-252.19	553.497	-288.75	532.508	-84.2236	477.129	-37.6072	427.448	-1.47252	397.13	20.5554	40.6409	-10.4177	49.8166	-6.51153	45.9419	-9.70235	46.0604
		15	481.632	-124.366	589.52	-77.5266	544.799	-115.698	550.408	-190.307	556.998	-247.582	561.706	-288.503	530.452	-84.6748	478.795	-35.6307	432.5	-1.5	399.236	23.0234	481.352	-124.64	590.117	-77.5853	544.535	-115.892	550.175	-190.299	556.677	-248.72	561.542	-288.401	530.728	-84.6021	478.442	-35.6579	432.418	-0.8103	399.756	24.2146	40.4978	-10.4864	49.6486	-6.52752	45.8136	-9.75036	46.2881
mg	19.1	16	479.846	-125.755	588.103	-77.8416	542.855	-116.759	552.524	-190.641	562.655	-244.754	570.714	-287.797	528.467	-84.8732	480.055	-33.8982	437.75	1	403.807	29	479.285	-125.611	587.901	-77.9756	542.629	-116.698	552.626	-190.175	562.256	-245.674	569.736	-287.429	528.705	-85.1375	479.686	-33.8007	437.473	0.598284	403.325	28.9539	40.3239	-10.5681	49.4621	-6.56036	45.6532	-9.8182	46.4943
		17	476.472	-126.748	585.74	-78.4716	540.203	-117.643	554.751	-189.862	567.252	-243.163	577.32	-286.094	526.483	-85.8655	480.843	-31.8507	442.75	3	407.916	34.8696	476.861	-126.739	585.311	-78.5985	540.378	-117.68	554.795	-189.714	567.629	-243.25	577.75	-285.774	526.441	-85.8258	480.778	-32.0876	442.273	2.50161	407.533	34.2913	40.12	-10.663	49.2442	-6.61276	45.4638	-9.90081	46.6768
		18	473.892	-127.938	582.433	-79.5742	537.551	-119.057	556.854	-188.825	572.732	-241.218	585.521	-283.42	523.903	-86.6593	481.63	-30.9056	448	4.75	413.81	40.9993	474.211	-128.045	582.228	-79.445	537.877	-118.778	556.644	-188.988	572.807	-241.37	585.465	-283.482	523.871	-86.609	481.743	-30.5777	446.576	4.7288	412.177	39.7203	39.897	-10.7729	48.9848	-6.68398	45.2534	-9.99322	46.8324
		19	471.312	-129.526	578.652	-80.2042	535.253	-119.941	558.045	-188.23	577.841	-239.454	593.675	-280.428	521.521	-88.0485	482.575	-29.1731	450.5	6.75	416.743	44.5565	471.391	-129.552	578.655	-80.4772	535.174	-119.945	558.129	-188.115	577.731	-239.87	592.722	-280.69	520.925	-87.4261	482.637	-29.3005	450.342	7.24676	417.265	44.9418	39.6597	-10.8996	48.6842	-6.77082	45.0261	-10.0914	46.9573
		20	468.335	-130.915	574.715	-81.7792	532.248	-121.179	559.633	-186.94	582.05	-238.332	599.153	-277.539	517.552	-88.0485	483.205	-28.0706	453	10.75	422.507	49.9402	468.356	-131.258	574.665	-81.6638	532.24	-121.193	559.248	-187.197	582.31	-238.527	599.405	-277.525	517.58	-88.2652	483.488	-28.3393	453.894	10.0273	423.165	49.9595	39.4044	-11.0432	48.3485	-6.87066	44.7791	-10.1964	47.0514
		21	465.358	-133.495	570.462	-83.3542	528.712	-122.593	559.986	-186.187	586.961	-237.63	605.888	-273.725	513.583	-89.0408	484.466	-27.7556	456.5	12.75	428.307	53.5847	465.026	-133.132	570.347	-82.9252	529.041	-122.549	560.013	-186.332	586.46	-237.001	605.603	-274.05	513.947	-89.2469	484.289	-27.7517	457.618	12.9712	430.184	54.7606	39.1242	-11.2009	47.9852	-6.97678	44.51	-10.3105	47.1158
		22	461.389	-135.281	565.422	-84.2993	525.883	-123.83	560.125	-185.5	590.469	-236.508	610.66	-270.448	509.614	-90.2315	484.938	-27.5981	462	15.25	438.288	59.5441	461.33	-135.082	565.805	-84.2168	525.535	-124.04	560.518	-185.563	590.072	-234.921	611.419	-270.299	510.144	-90.4662	484.974	-27.5273	461.646	16.1033	438.342	59.2394	38.8132	-11.3649	47.6031	-7.08545	44.2151	-10.4359	47.1583
		23	457.222	-136.869	560.697	-85.5593	521.994	-125.598	560.301	-184.591	593.416	-232.579	616.44	-265.945	506.637	-91.6207	485.568	-27.7556	466	19	447.408	63.4244	457.274	-137.09	561.153	-85.6033	521.623	-125.689	560.85	-184.877	593.159	-232.136	616.965	-266.241	506.175	-91.9452	485.5	-27.6449	465.821	19.3906	447.189	63.0381	38.472	-11.5339	47.2117	-7.2021	43.886	-10.5747	47.1862
		24	452.856	-139.25	556.76	-86.8193	517.397	-127.543	560.71	-183.938	595.099	-227.668	621.811	-261.635	501.874	-94.0022	486.041	-28.0706	470.25	23.25	456.973	66.402	452.895	-139.193	556.397	-87.19	517.289	-127.47	560.974	-184.227	595.868	-228.921	622.162	-261.845	501.929	-93.6225	485.83	-28.1064	470.014	22.5704	456.172	65.8234	38.1036	-11.7108	46.8115	-7.3356	43.5213	-10.7244	47.1966
		25	448.093	-141.433	551.719	-88.8669	512.27	-129.664	560.382	-183.369	597.906	-224.862	626.68	-256.68	497.905	-95.7883	485.883	-29.3306	473.75	26	464.711	67.2187	448.218	-141.392	551.437	-89.0558	512.626	-129.325	560.693	-183.476	598.382	-225.67	626.753	-257.006	497.367	-95.3707	485.953	-28.9406	474.171	25.2814	464.826	67.4005	37.7101	-11.8958	46.3943	-7.49257	43.129	-10.8806	47.173
		26	443.33	-143.616	546.049	-91.3869	507.851	-131.079	560.54	-183.211	600.852	-222.476	631.346	-252.178	492.348	-97.376	485.883	-30.1181	478.75	27.5	473.739	67.9763	443.249	-143.689	546.247	-91.1818	507.753	-131.232	559.7	-182.402	600.698	-222.471	630.363	-251.538	492.495	-97.1546	485.904	-30.1968	478.276	27.3357	472.876	67.7183	37.2921	-12.0891	45.9577	-7.67144	42.719	-11.041	47.0895
		27	438.368	-145.799	540.537	-93.4344	502.547	-133.023	558.943	-181.64	602.536	-219.249	633.783	-246.207	486.99	-98.5667	485.568	-31.5357	482.5	28.75	480.544	67.1799	437.97	-146.097	540.876	-93.4965	502.72	-133.238	557.651	-180.787	602.669	-219.154	632.64	-245.205	487.427	-99.0682	485.714	-32.0067	482.261	28.7573	480.118	66.7316	36.8479	-12.2917	45.5058	-7.86618	42.2955	-11.2098	46.9171
		28	432.018	-148.975	535.654	-96.112	497.951	-135.498	555.937	-179.519	603.799	-215.741	634.753	-239.168	482.227	-101.147	485.038	-34.1761	485.5	29.25	485.758	64.6646	432.394	-148.596	535.323	-95.9609	497.569	-135.363	554.448	-178.64	604.148	-215.512	633.513	-237.955	482.255	-101.251	485.397	-34.4792	486.152	29.6483	486.56	64.4693	36.3787	-12.5019	45.0385	-8.07351	41.8622	-11.3886	46.6476
		29	426.858	-151.158	529.984	-98.4746	491.763	-137.797	548.25	-175.25	605.667	-212.084	631.446	-228.621	477.266	-103.33	484.623	-37.5208	489.995	30.25	492.434	61.0134	426.609	-151.115	529.517	-98.5421	492.33	-137.578	550.423	-176.263	604.947	-211.374	633.303	-230.07	476.956	-103.736	484.912	-37.5945	490.023	30.0958	492.31	61.0883	35.892	-12.7138	44.55	-8.29069	41.4214	-11.5749	46.3089
		30	420.706	-153.539	523.526	-101.152	486.99	-139.565	545.336	-173.385	605.438	-207.628	631.218	-222.317	471.709	-106.505	484.151	-41.4584	493.354	30.25	496.734	56.5807	420.654	-153.657	523.47	-101.235	487.079	-139.882	546.193	-174.145	604.83	-206.665	632.569	-222.084	471.496	-106.479	484.11	-41.2323	493.808	30.1044	497.328	56.8114	35.3911	-12.9277	44.0413	-8.51721	40.9796	-11.7688	45.9531
		31	414.355	-156.318	516.754	-103.987	482.04	-142.393	541.64	-172.384	604.554	-201.44	631.375	-213.828	465.557	-109.68	483.269	-45.1189	497.597	29	502.029	51.9277	414.608	-156.247	517.324	-104.021	481.777	-142.318	541.919	-172.556	603.743	-201.54	631.443	-214.282	465.923	-109.34	482.76	-45.2512	497.374	29.6993	501.518	51.8423	34.8824	-13.1456	43.5243	-8.75163	40.5335	-11.9737	45.5935
		32	408.401	-158.897	511.241	-106.822	476.206	-144.868	537.596	-171.797	600.841	-195.253	630.272	-206.168	459.802	-112.657	481.024	-49.188	500.779	29	505.237	46.6437	408.56	-158.891	511.227	-106.859	476.349	-144.868	537.426	-171.521	601.856	-196.408	629.638	-206.895	460.329	-112.179	480.65	-49.5497	500.493	28.9081	504.689	46.3324	34.3735	-13.368	43.0113	-8.99044	40.0768	-12.1883	45.2155
		33	402.448	-161.676	505.098	-109.972	470.902	-147.52	533.627	-170.805	598.366	-190.833	628.055	-200.018	455.039	-115.039	478.077	-53.6781	503.254	28.0308	507.183	40.7826	402.534	-161.605	505.201	-109.694	470.765	-147.519	532.436	-170.999	599.501	-191.647	626.812	-200.02	454.705	-114.965	477.711	-53.9884	502.982	27.6124	506.762	40.4576	33.8666	-13.5964	42.5043	-9.2289	39.6071	-12.4113	44.7956
		34	396.692	-164.057	499.113	-112.492	465.068	-150.172	527.078	-170.606	597.482	-188.005	623.035	-194.319	449.482	-117.619	474.289	-59.1503	505.376	26.0861	508.156	33.7098	396.501	-164.413	499.233	-112.473	464.989	-150.258	526.76	-170.994	596.759	-187.315	622.833	-193.564	448.92	-117.798	474.006	-58.32	504.747	25.6988	507.836	34.4878	33.359	-13.8326	42.0022	-9.46272	39.1211	-12.6417	44.3181
		35	390.54	-167.431	493.601	-115.17	459.764	-153	520.403	-171.563	594.654	-183.055	618.083	-186.68	442.734	-120.198	469.518	-63.5001	505.906	23.4343	507.682	27.6782	390.412	-167.337	493.279	-115.209	459.007	-153.069	520.512	-171.457	593.438	-183.264	617.901	-187.434	442.921	-120.812	469.72	-62.2533	505.811	23.1763	508.154	28.7407	32.8467	-14.0787	41.5013	-9.6929	38.6179	-12.8782	43.7925
		36	384.19	-170.408	487.301	-117.847	451.809	-156.183	513.508	-172.094	589.35	-179.165	611.924	-181.27	436.781	-123.969	464.747	-65.1838	506.421	20.2521	508.08	23.6545	384.265	-170.327	487.283	-117.931	452.879	-155.911	513.938	-172.244	589.515	-179.439	612.343	-181.668	436.791	-124.07	465.111	-65.7398	506.363	20.1812	508.032	23.3145	32.3296	-14.3302	40.9968	-9.92194	38.1023	-13.1174	43.2393
		37	378.037	-173.385	481.158	-120.683	447.036	-158.658	507	-173.75	584.375	-176.25	605.792	-176.942	430.43	-127.938	460.117	-68.5514	505.859	16.186	507.07	18.4281	378.095	-173.337	481.255	-120.657	446.778	-158.741	507.253	-173.208	585.275	-175.764	606.514	-176.149	430.601	-127.48	460.389	-69.0307	506.648	16.9342	507.698	18.0403	31.8104	-14.5835	40.4897	-10.1513	37.589	-13.3554	42.6769
[truncated: 198 more columns]

## Sheet: C0040
			RAW COORDINATES																				SPLINE																				mm
			HEAD		TAIL		LEFT COXAE		LEFT FT		LEFT TT		LEFT TIP		RIGHT COXAE		RIGHT FT		RIGHT TT		RIGHT TIP		HEAD		TAIL		LEFT COXAE		LEFT FT		LEFT TT		LEFT TIP		RIGHT COXAE		RIGHT FT		RIGHT TT		RIGHT TIP		HEAD		TAIL		LEFT COXAE		LEFT FT
SCALE		Frame	X	Y	X	Y	X	Y	X	Y	X	Y	X	Y	X	Y	X	Y	X	Y	X	Y	X	Y	X	Y	X	Y	X	Y	X	Y	X	Y	X	Y	X	Y	X	Y	X	Y	X	Y	X	Y	X	Y	X
X	Y	-2	-305.5	-308	-381	-342	-348.416	-317.228	-344.851	-263.762	-346	-232.5	-348.48	-164.986	-339.505	-334.604	-291.832	-371.584	-271.092	-405.05	-239.762	-455.601	-305.34	-308.229	-381.321	-342.154	-348.224	-317.521	-345.09	-263.881	-345.374	-232.016	-345.893	-165.096	-339.614	-334.561	-291.591	-371.827	-270.638	-404.63	-238.482	-455.188	-37.1597	-37.5113	-46.4065	-41.6399	-42.3786	-38.6421	-41.9973
445.733	-208.578	-1	-305.5	-308	-381	-342	-348.416	-317.228	-344.851	-263.762	-346	-232.5	-348.48	-164.986	-339.505	-334.604	-291.832	-371.584	-271.092	-405.05	-239.762	-455.601	-305.34	-308.229	-381.321	-342.154	-348.224	-317.521	-345.09	-263.881	-345.374	-232.016	-345.893	-165.096	-339.614	-334.561	-291.591	-371.827	-270.638	-404.63	-238.482	-455.188	-37.1597	-37.5113	-46.4065	-41.6399	-42.3786	-38.6421	-41.9973
444.542	-290.739	0	-305.5	-308	-381	-342	-348.416	-317.228	-344.851	-263.762	-346	-232.5	-348.48	-164.986	-339.505	-334.604	-291.832	-371.584	-271.092	-405.05	-239.762	-455.601	-305.34	-308.229	-381.321	-342.154	-348.224	-317.521	-345.09	-263.881	-345.374	-232.016	-345.893	-165.096	-339.614	-334.561	-291.591	-371.827	-270.638	-404.63	-238.482	-455.188	-37.1597	-37.5113	-46.4065	-41.6399	-42.3786	-38.6421	-41.9973
		1	-305.5	-308	-381	-342	-348.416	-317.228	-344.851	-263.762	-346	-232.5	-348.48	-164.986	-339.505	-334.604	-291.832	-371.584	-271.092	-405.05	-239.762	-455.601	-305.34	-308.229	-381.321	-342.154	-348.224	-317.521	-345.09	-263.881	-345.374	-232.016	-345.893	-165.096	-339.614	-334.561	-291.591	-371.827	-270.638	-404.63	-238.482	-455.188	-37.1597	-37.5113	-46.4065	-41.6399	-42.3786	-38.6421	-41.9973
DISTANCE (mm)		2	-304.5	-308.5	-381.5	-342.5	-347.97	-317.673	-346.634	-263.762	-345.5	-232.5	-343.052	-164.984	-339.505	-334.604	-292.723	-372.03	-270.695	-405.447	-238.322	-454.556	-305.338	-308.124	-381.108	-342.136	-347.962	-317.38	-346.264	-263.457	-346.177	-232.788	-345.851	-164.666	-339.694	-334.571	-293.297	-371.192	-271.194	-405.755	-240.101	-454.493	-37.1594	-37.4985	-46.3807	-41.6378	-42.3468	-38.6249	-42.1402
pixel	mm	3	-306	-307.5	-380.5	-342	-347.079	-317.228	-347.079	-263.317	-347.5	-232.5	-348.429	-164.483	-339.95	-334.604	-294.505	-370.693	-272.282	-407.034	-242.939	-455.02	-305.343	-307.961	-380.808	-342.086	-347.767	-317.156	-347.378	-263.009	-347.155	-233.709	-346.533	-164.216	-339.725	-334.596	-295.053	-370.52	-271.877	-407.007	-242.057	-453.942	-37.1601	-37.4787	-46.3442	-41.6317	-42.3231	-38.5977	-42.2758
82.1696	10	4	-305.5	-308	-381	-341.5	-347.97	-316.782	-348.861	-261.98	-347.5	-235.5	-343.786	-163.267	-339.95	-334.158	-298.069	-369.356	-272.282	-407.828	-243.035	-451.462	-305.209	-307.745	-380.406	-342.051	-347.667	-316.836	-348.439	-262.602	-348.349	-234.794	-348.134	-163.815	-339.63	-334.663	-296.745	-369.979	-272.722	-408.441	-244.33	-453.755	-37.1438	-37.4524	-46.2952	-41.6274	-42.3109	-38.5587	-42.4048
1	0.121699	5	-305	-308	-380	-342	-347.525	-316.782	-349.307	-261.98	-350	-236	-351.943	-163.172	-339.059	-335.05	-298.069	-369.356	-273.87	-409.813	-247.329	-454.183	-304.908	-307.407	-379.872	-342.045	-347.552	-316.438	-349.429	-262.352	-349.792	-235.806	-350.873	-163.578	-339.389	-334.77	-298.18	-369.784	-273.803	-410.069	-246.928	-454.271	-37.1072	-37.4113	-46.2302	-41.6267	-42.2969	-38.5103	-42.5253
		6	-304	-306.5	-378.5	-342.5	-347.525	-315.446	-350.198	-262.871	-351.5	-237.5	-355.264	-164.158	-339.059	-334.604	-298.515	-371.139	-275.061	-412.194	-249.484	-456.964	-304.522	-306.948	-379.3	-341.953	-347.339	-315.992	-350.405	-262.23	-351.354	-236.61	-354.149	-163.489	-339.05	-334.818	-299.427	-369.997	-275.121	-411.749	-249.636	-455.362	-37.0602	-37.3554	-46.1606	-41.6156	-42.271	-38.456	-42.6441
LENGTH (mm)		7	-304	-306.5	-379	-342	-347.079	-315.891	-351.535	-261.98	-353.5	-236.5	-359.136	-163.43	-339.059	-335.05	-301.188	-368.911	-276.648	-414.179	-254.081	-455.807	-304.139	-306.489	-378.804	-341.648	-346.969	-315.57	-351.406	-262.123	-352.912	-237.209	-357.421	-163.444	-338.605	-334.73	-300.553	-370.609	-276.665	-413.271	-252.25	-456.84	-37.0135	-37.2996	-46.1003	-41.5783	-42.2259	-38.4047	-42.766
Body	10.1918	8	-303.5	-306	-378.5	-341	-346.634	-315	-351.98	-262.426	-354	-237.5	-359.964	-163.905	-337.723	-335.05	-302.079	-371.584	-278.236	-414.576	-254.139	-458.024	-303.726	-306.087	-378.334	-341.142	-346.427	-315.16	-352.428	-262.035	-354.424	-237.777	-360.56	-163.471	-338.055	-334.417	-301.448	-371.754	-278.413	-414.566	-254.655	-458.821	-36.9633	-37.2506	-46.043	-41.5168	-42.16	-38.3548	-42.8902
R. Femur	6.63693	9	-304	-305.5	-378	-340.5	-345.743	-314.554	-353.762	-261.98	-356.5	-238	-364.974	-163.775	-337.277	-333.713	-302.079	-373.812	-280.617	-414.972	-256.38	-461.456	-303.177	-305.768	-377.845	-340.555	-345.749	-314.782	-353.454	-261.997	-355.963	-238.361	-363.855	-163.653	-337.484	-333.883	-302.129	-373.23	-280.323	-415.794	-257.119	-461.227	-36.8965	-37.2118	-45.9836	-41.4454	-42.0775	-38.3087	-43.0152
R. Tibia	4.20642	10	-302.5	-306	-376.5	-339.5	-344.406	-314.554	-354.653	-261.089	-357	-240	-365.584	-162.852	-336.832	-332.822	-302.079	-375.149	-282.602	-416.957	-260.339	-464.746	-302.373	-305.526	-377.356	-339.988	-345.021	-314.424	-354.394	-262.118	-357.573	-238.885	-367.623	-164.182	-336.918	-333.287	-302.792	-374.736	-282.332	-417.123	-259.852	-463.757	-36.7986	-37.1823	-45.924	-41.3764	-41.9889	-38.2652	-43.1296
R. Tarsus	2.10277	11	-301	-305	-377.5	-339.5	-344.406	-314.109	-355.545	-262.426	-359	-239	-369.968	-164.641	-336.386	-332.822	-302.97	-376.931	-283.793	-418.545	-261.601	-466.7	-301.374	-305.314	-376.875	-339.496	-344.305	-314.022	-355.216	-262.47	-359.36	-239.239	-372.284	-165.225	-336.31	-332.757	-303.615	-376.117	-284.447	-418.527	-262.895	-466.17	-36.6771	-37.1566	-45.8655	-41.3164	-41.9018	-38.2163	-43.2296
L. Femur	5.92807	12	-300	-305	-376.5	-339	-343.515	-313.663	-355.099	-263.317	-361	-239	-378.409	-167.261	-335.941	-331.931	-305.198	-376.04	-286.968	-420.132	-267.432	-467.384	-300.299	-305.162	-376.266	-339.017	-343.53	-313.534	-355.984	-262.883	-361.312	-239.53	-377.728	-166.619	-335.585	-332.309	-304.575	-377.391	-286.718	-419.895	-266.285	-468.495	-36.5463	-37.1381	-45.7914	-41.2581	-41.8074	-38.1569	-43.3231
L. Tibia	5.36792	13	-299	-305.5	-375	-339	-343.069	-312.772	-356.881	-264.208	-364.5	-240	-386.555	-169.924	-334.158	-332.376	-306.089	-379.158	-288.953	-420.926	-268.571	-470.604	-299.168	-305.045	-375.495	-338.463	-342.609	-312.951	-356.8	-263.147	-363.284	-239.847	-383.237	-168.031	-334.702	-331.928	-305.498	-378.705	-289.073	-421.122	-269.857	-470.875	-36.4086	-37.1239	-45.6976	-41.1908	-41.6954	-38.086	-43.4223
L. Tarsus	1.85861	14	-298.5	-304.5	-375	-337	-341.733	-312.772	-357.772	-262.871	-365	-240	-387.557	-168.622	-334.158	-331.485	-305.644	-380.05	-291.731	-423.308	-275.38	-474.146	-297.905	-304.91	-374.592	-337.775	-341.487	-312.29	-357.588	-263.206	-365.109	-240.153	-388.309	-169.346	-333.676	-331.539	-306.346	-379.976	-291.455	-422.151	-273.559	-473.215	-36.2548	-37.1074	-45.5876	-41.107	-41.5588	-38.0055	-43.5182
		15	-296	-305	-373.5	-337.5	-339.505	-311.436	-358.218	-262.871	-366	-240.5	-390.693	-169.515	-332.822	-331.04	-307.426	-380.941	-294.112	-422.514	-277.28	-475.075	-296.409	-304.773	-373.507	-336.967	-340.223	-311.559	-358.251	-263.252	-366.874	-240.404	-393.19	-170.877	-332.443	-331.148	-307.213	-381.145	-293.808	-422.956	-277.216	-475.345	-36.0728	-37.0907	-45.4556	-41.0087	-41.405	-37.9166	-43.599
mg	16.7	16	-295.5	-304.5	-372.5	-336.5	-338.614	-310.545	-359.554	-262.871	-369	-241	-398.743	-172.129	-330.149	-330.594	-308.762	-381.832	-296.097	-424.101	-280.392	-476.516	-294.685	-304.598	-372.259	-335.94	-338.921	-310.862	-358.739	-263.441	-368.657	-240.54	-398.003	-172.804	-331.041	-330.764	-308.081	-382.19	-296.152	-423.74	-280.998	-477.28	-35.8631	-37.0694	-45.3037	-40.8838	-41.2465	-37.8318	-43.6583
		17	-292.5	-304.5	-370	-334.5	-337.723	-310.099	-358.218	-264.653	-371.5	-240	-405.099	-177.635	-329.703	-330.594	-307.871	-383.168	-298.082	-423.705	-284.667	-479.249	-292.724	-304.369	-370.898	-334.705	-337.516	-310.283	-359.047	-263.789	-370.355	-240.537	-402.303	-174.915	-329.571	-330.362	-308.974	-383.021	-298.586	-424.691	-285.16	-478.982	-35.6244	-37.0415	-45.1381	-40.7335	-41.0755	-37.7613	-43.6958
		18	-290.5	-304	-370.5	-333	-336.832	-309.653	-359.109	-264.208	-371.5	-240.5	-404.894	-176.608	-328.812	-329.703	-309.653	-384.059	-301.257	-425.292	-289.93	-480.915	-290.666	-304.07	-369.481	-333.418	-335.843	-309.815	-359.31	-264.21	-371.955	-240.451	-405.828	-176.921	-327.959	-329.883	-310.026	-383.468	-301.187	-425.998	-289.793	-480.236	-35.3739	-37.0052	-44.9657	-40.5767	-40.872	-37.7044	-43.7278
		19	-288	-304	-366.5	-332.5	-334.158	-310.099	-360	-263.762	-373.5	-240.5	-409.613	-178.272	-325.693	-329.703	-311.881	-384.059	-304.035	-427.277	-294.225	-481.313	-288.637	-303.705	-367.931	-332.195	-333.826	-309.385	-359.508	-264.782	-373.7	-240.246	-408.943	-179.098	-326.161	-329.302	-311.134	-383.403	-303.916	-427.607	-294.851	-480.887	-35.1269	-36.9608	-44.7769	-40.4279	-40.6264	-37.6519	-43.752
		20	-287	-303	-367	-330.5	-330.149	-308.317	-359.554	-265.99	-374.5	-241	-410.288	-181.16	-324.356	-328.812	-312.327	-382.723	-306.814	-430.055	-300.891	-480.902	-286.675	-303.286	-366.268	-331.064	-331.641	-308.908	-359.557	-265.576	-375.782	-239.879	-411.998	-181.758	-324.305	-328.589	-312.09	-382.883	-306.73	-429.228	-300.254	-480.972	-34.8883	-36.9098	-44.5746	-40.2903	-40.3605	-37.594	-43.7579
		21	-284.5	-303	-365	-330	-330.149	-308.317	-359.554	-266.436	-378	-239	-414.704	-184.408	-321.683	-327.475	-312.772	-382.277	-309.195	-429.658	-305.331	-480.84	-284.685	-302.872	-364.289	-330.068	-329.514	-308.425	-359.473	-266.451	-378.249	-239.433	-415.342	-184.971	-322.467	-327.806	-312.852	-382.134	-309.619	-430.501	-305.823	-480.659	-34.6461	-36.8593	-44.3338	-40.1691	-40.1016	-37.5352	-43.7476
		22	-283	-302	-362	-329.5	-327.475	-308.317	-359.109	-267.772	-381	-239	-418.959	-189.109	-321.238	-326.584	-313.218	-380.495	-312.767	-432.437	-312.361	-479.335	-282.597	-302.479	-361.916	-329.132	-327.384	-307.872	-359.302	-267.304	-380.833	-239.236	-418.942	-188.596	-320.661	-327.073	-313.466	-381.396	-312.579	-431.191	-311.463	-480.136	-34.3919	-36.8115	-44.0449	-40.0552	-39.8424	-37.4679	-43.7268
		23	-280	-302.5	-359.5	-328.5	-324.802	-307.871	-359.109	-267.772	-383.5	-239	-423.025	-192.375	-319.01	-327.03	-314.109	-380.495	-314.752	-431.643	-315.351	-479.331	-280.34	-302.112	-359.278	-328.158	-325.255	-307.155	-359.1	-268.078	-383.143	-239.568	-422.517	-192.355	-318.759	-326.415	-313.961	-380.877	-315.521	-430.985	-317.052	-479.583	-34.1172	-36.7668	-43.7239	-39.9367	-39.5834	-37.3806	-43.7023
		24	-278.5	-301.5	-356	-326.5	-323.02	-305.644	-359.109	-268.663	-386.5	-239.5	-426.778	-196.616	-316.337	-325.248	-314.554	-380.495	-319.515	-429.658	-324.477	-478.839	-277.905	-301.693	-356.578	-327.145	-323.165	-306.314	-358.884	-268.803	-384.835	-240.598	-425.788	-196.059	-316.735	-325.767	-314.312	-380.568	-318.334	-429.847	-322.55	-478.992	-33.8209	-36.7159	-43.3954	-39.8134	-39.329	-37.2782	-43.676
		25	-275	-302	-353	-326.5	-321.238	-305.198	-358.218	-269.554	-385.5	-243	-429.049	-200.613	-315	-325.248	-315	-380.05	-321.103	-428.071	-327.461	-478.104	-275.264	-301.198	-354.042	-326.154	-321.043	-305.539	-358.673	-269.461	-385.75	-242.289	-428.645	-199.581	-314.63	-325.141	-314.529	-380.319	-320.807	-427.949	-327.688	-478.244	-33.4995	-36.6556	-43.0867	-39.6928	-39.0707	-37.184	-43.6503
		26	-273	-300	-352	-325	-319.455	-305.198	-358.218	-270.446	-386	-244	-429.812	-202.296	-312.327	-324.802	-313.663	-381.386	-321.499	-424.895	-331.183	-478.664	-272.488	-300.622	-351.715	-325.139	-318.77	-304.892	-358.515	-269.988	-386.112	-244.363	-431.258	-202.984	-312.428	-324.477	-314.712	-379.925	-322.972	-425.463	-332.529	-477.163	-33.1617	-36.5855	-42.8035	-39.5692	-38.7941	-37.1052	-43.631
		27	-269.5	-300	-350.5	-324.5	-315.891	-303.861	-358.218	-270.446	-385	-247.5	-433.28	-206.136	-310.099	-323.911	-315	-379.158	-325.865	-422.514	-339.028	-475.037	-269.653	-300.1	-349.39	-324.087	-316.304	-304.332	-358.346	-270.36	-386.18	-246.621	-433.86	-206.557	-310.171	-323.724	-315.022	-379.199	-324.913	-422.547	-337.116	-475.618	-32.8166	-36.5221	-42.5205	-39.4413	-38.494	-37.037	-43.6105
		28	-266	-299.5	-346.5	-322.5	-314.109	-303.861	-358.218	-270.446	-387	-249	-437.479	-211.389	-307.871	-322.574	-315	-377.822	-326.659	-419.338	-341.725	-472.984	-266.926	-299.665	-346.928	-322.999	-313.745	-303.845	-358.005	-270.666	-386.104	-248.873	-436.348	-210.465	-307.894	-322.924	-315.407	-378.267	-326.448	-419.235	-341.279	-473.779	-32.4848	-36.4691	-42.221	-39.3088	-38.1826	-36.9778	-43.5691
		29	-264	-299.5	-344	-322.5	-310.99	-303.861	-357.327	-270.891	-385.5	-250	-436.723	-212.017	-305.644	-322.129	-316.337	-376.931	-328.247	-417.354	-344.273	-471.744	-264.416	-299.28	-344.437	-321.931	-311.161	-303.327	-357.296	-271.031	-385.809	-251.113	-438.466	-214.795	-305.608	-322.161	-315.725	-377.307	-327.542	-415.527	-345.236	-471.723	-32.1793	-36.4222	-41.9178	-39.1789	-37.8681	-36.9148	-43.4827
		30	-263	-298.5	-342.5	-320.5	-307.871	-302.525	-356.436	-271.337	-385.5	-254	-441.324	-220.701	-302.97	-321.238	-315.446	-375.149	-327.453	-410.209	-347.471	-468.66	-261.99	-298.88	-341.962	-320.883	-308.667	-302.682	-356.065	-271.524	-385.341	-253.353	-440.085	-219.659	-303.317	-321.446	-315.778	-376.37	-328.3	-411.548	-349.359	-469.317	-31.8841	-36.3735	-41.6166	-39.0513	-37.5646	-36.8362	-43.3329
		31	-259	-299	-339	-319	-306.535	-302.079	-354.208	-271.782	-384.5	-255.5	-441.271	-224.985	-301.188	-320.792	-315.891	-376.485	-328.247	-406.637	-353.371	-467.947	-259.423	-298.416	-339.458	-319.932	-306.317	-301.925	-354.198	-272.159	-384.735	-255.393	-440.816	-224.649	-301.014	-320.752	-315.464	-375.326	-328.955	-407.768	-353.718	-466.346	-31.5716	-36.3171	-41.3118	-38.9356	-37.2786	-36.7441	-43.1057
		32	-258	-298	-337	-320.5	-303.861	-301.188	-351.98	-273.119	-385	-257.5	-441.332	-230.854	-299.406	-320.347	-314.554	-374.703	-329.835	-404.653	-359.475	-462.749	-256.673	-297.803	-336.95	-319.051	-303.985	-301.078	-351.669	-272.878	-384.033	-257.126	-440.474	-229.455	-298.621	-320.005	-314.665	-373.812	-329.544	-404.394	-357.88	-462.541	-31.237	-36.2424	-41.0066	-38.8283	-36.9948	-36.6411	-42.7979
		33	-252.5	-297	-334.5	-317.5	-302.079	-299.851	-349.307	-273.564	-382	-259	-439.596	-233.342	-295.396	-319.455	-313.663	-372.03	-330.232	-401.874	-361.639	-458.449	-253.735	-297.073	-334.393	-318.056	-301.543	-300.194	-348.492	-273.544	-383.284	-258.524	-439.102	-233.985	-296.129	-319.149	-313.332	-371.709	-329.913	-401.313	-361.315	-457.971	-30.8795	-36.1536	-40.6954	-38.7072	-36.6976	-36.5335	-42.4113
		34	-250.5	-296	-332	-317	-298.96	-299.406	-343.96	-274.01	-382	-259	-435.905	-237.73	-293.168	-317.673	-312.327	-369.356	-330.232	-398.699	-363.813	-453.732	-250.812	-296.336	-331.733	-317.013	-298.878	-299.339	-344.8	-274.048	-382.675	-259.68	-436.988	-238.445	-293.672	-318.223	-311.437	-369.188	-329.948	-398.438	-363.857	-452.87	-30.5237	-36.064	-40.3717	-38.5803	-36.3733	-36.4294	-41.9619
		35	-249	-295.5	-329.5	-316	-296.733	-298.069	-342.178	-274.455	-382	-260.5	-435.459	-241.765	-292.277	-316.782	-308.317	-366.238	-329.438	-395.127	-366.653	-446.03	-247.883	-295.677	-328.959	-315.942	-295.996	-298.513	-340.88	-274.304	-382.113	-260.777	-434.524	-242.935	-291.235	-317.325	-309.072	-366.55	-329.646	-395.84	-365.5	-447.643	-30.1672	-35.9837	-40.0341	-38.4499	-36.0226	-36.3289	-41.4849
		36	-244	-295.5	-325	-315	-292.277	-298.069	-335.495	-274.901	-381	-262	-430.59	-247.941	-288.267	-317.228	-306.089	-362.673	-329.041	-393.142	-365.561	-441.623	-244.847	-295.087	-326.158	-314.829	-292.995	-297.685	-336.949	-274.221	-381.276	-261.855	-431.933	-247.289	-288.707	-316.416	-306.505	-364.136	-329.071	-393.641	-366.313	-442.825	-29.7978	-35.912	-39.6932	-38.3146	-35.6574	-36.2281	-41.0065
		37	-242.5	-294.5	-323.5	-313.5	-289.604	-297.178	-332.376	-274.01	-382.5	-263.5	-429.116	-253.726	-286.485	-315.891	-304.307	-362.673	-328.644	-392.348	-366.987	-439.101	-241.796	-294.526	-323.488	-313.687	-290.105	-296.749	-333.389	-273.784	-379.758	-262.861	-429.513	-251.072	-286.159	-315.345	-303.861	-362.144	-328.254	-391.788	-366.582	-438.567	-29.4265	-35.8436	-39.3683	-38.1755	-35.3056	-36.1142	-40.5733
		38	-238	-293.5	-321.5	-312.5	-287.376	-295.396	-330.594	-272.228	-378	-263	-427.616	-253.342	-282.921	-313.218	-300.743	-360	-327.056	-389.967	-365.961	-434.273	-238.729	-294.032	-320.878	-312.555	-287.404	-295.686	-330.268	-273.15	-377.244	-263.794	-427.291	-254.08	-283.64	-314.149	-301.152	-360.449	-327.231	-390.105	-366.51	-434.681	-29.0532	-35.7835	-39.0507	-38.0378	-34.9769	-35.9849	-40.1934
		39	-236	-294	-318	-311.5	-285.149	-294.505	-327.921	-272.673	-372	-265	-425.3	-255.722	-281.584	-313.218	-298.515	-359.554	-325.865	-388.776	-366.059	-431.719	-235.717	-293.633	-318.226	-311.441	-284.815	-294.581	-327.357	-272.518	-374.067	-264.763	-425.141	-256.709	-281.209	-312.981	-298.443	-358.939	-326.113	-388.506	-366.318	-431.013	-28.6867	-35.735	-38.7279	-37.9021	-34.6619	-35.8504	-39.8392
[truncated: 198 more columns]

## Sheet: C0042
			RAW COORDINATES																				SPLINE																				mm
			HEAD		TAIL		LEFT COXAE		LEFT FT		LEFT TT		LEFT TIP		RIGHT COXAE		RIGHT FT		RIGHT TT		RIGHT TIP		HEAD		TAIL		LEFT COXAE		LEFT FT		LEFT TT		LEFT TIP		RIGHT COXAE		RIGHT FT		RIGHT TT		RIGHT TIP		HEAD		TAIL		LEFT COXAE		LEFT FT
SCALE		Frame	X	Y	X	Y	X	Y	X	Y	X	Y	X	Y	X	Y	X	Y	X	Y	X	Y	X	Y	X	Y	X	Y	X	Y	X	Y	X	Y	X	Y	X	Y	X	Y	X	Y	X	Y	X	Y	X	Y	X
X	Y	-2	425.984	-637.295	427.373	-709.031	413.766	-673.623	372.166	-647.058	339.018	-631.036	283.173	-604.043	439.699	-673.289	483.531	-651.384	524.204	-651.19	582.374	-650.912	425.949	-637.253	427.36	-709.059	413.806	-673.725	372.121	-647.121	339.044	-631.031	283.236	-603.872	439.714	-673.285	483.526	-651.395	524.032	-651.17	582.362	-650.845	51.8377	-77.5533	52.0095	-86.2921	50.3599	-81.9919	45.2869
445.733	-208.578	-1	425.984	-637.295	427.373	-709.031	413.766	-673.623	372.166	-647.058	339.018	-631.036	283.173	-604.043	439.699	-673.289	483.531	-651.384	524.204	-651.19	582.374	-650.912	425.949	-637.253	427.36	-709.059	413.806	-673.725	372.121	-647.121	339.044	-631.031	283.236	-603.872	439.714	-673.285	483.526	-651.395	524.032	-651.17	582.362	-650.845	51.8377	-77.5533	52.0095	-86.2921	50.3599	-81.9919	45.2869
444.542	-290.739	0	425.984	-637.295	427.373	-709.031	413.766	-673.623	372.166	-647.058	339.018	-631.036	283.173	-604.043	439.699	-673.289	483.531	-651.384	524.204	-651.19	582.374	-650.912	425.949	-637.253	427.36	-709.059	413.806	-673.725	372.121	-647.121	339.044	-631.031	283.236	-603.872	439.714	-673.285	483.526	-651.395	524.032	-651.17	582.362	-650.845	51.8377	-77.5533	52.0095	-86.2921	50.3599	-81.9919	45.2869
		1	425.984	-637.295	427.373	-709.031	413.766	-673.623	372.166	-647.058	339.018	-631.036	283.173	-604.043	439.699	-673.289	483.531	-651.384	524.204	-651.19	582.374	-650.912	425.949	-637.253	427.36	-709.059	413.806	-673.725	372.121	-647.121	339.044	-631.031	283.236	-603.872	439.714	-673.285	483.526	-651.395	524.032	-651.17	582.362	-650.845	51.8377	-77.5533	52.0095	-86.2921	50.3599	-81.9919	45.2869
DISTANCE (mm)		2	425.984	-637.295	427.373	-709.031	413.766	-673.735	372.008	-647.373	339.018	-631.213	283.243	-603.891	439.787	-673.289	483.829	-651.384	524.204	-651.19	582.671	-650.908	425.954	-637.222	427.404	-709.008	413.717	-673.571	372.066	-647.232	339.043	-631.134	283.219	-603.897	439.752	-673.363	483.939	-651.422	524.483	-651.339	582.785	-651.22	51.8384	-77.5495	52.0148	-86.2859	50.3491	-81.9732	45.2803
pixel	mm	3	425.917	-637	427.373	-709.031	413.766	-673.401	372.008	-647.373	339.018	-631.213	283.243	-603.791	439.787	-673.465	484.524	-651.583	524.911	-651.367	583.366	-651.054	425.973	-637.209	427.451	-708.949	413.617	-673.392	372.023	-647.329	339.032	-631.243	283.181	-603.98	439.787	-673.437	484.348	-651.443	524.977	-651.506	583.204	-651.6	51.8407	-77.548	52.0205	-86.2788	50.337	-81.9514	45.275
82.1696	10	4	425.984	-637.196	427.572	-708.832	413.432	-673.289	372.008	-647.373	339.195	-631.213	283.335	-603.703	439.787	-673.554	484.623	-651.484	525.441	-651.72	583.465	-652.057	426.024	-637.239	427.492	-708.884	413.516	-673.2	371.99	-647.436	338.993	-631.38	283.112	-604.167	439.824	-673.49	484.733	-651.451	525.488	-651.629	583.603	-651.888	51.8469	-77.5516	52.0255	-86.2707	50.3246	-81.9281	45.271
1	0.121699	5	426.183	-637.395	427.572	-708.832	413.432	-672.844	371.75	-647.75	338.617	-631.938	282.544	-605.178	439.876	-673.554	485.218	-651.682	526.06	-651.986	584.059	-652.417	426.11	-637.289	427.504	-708.829	413.452	-673.025	371.958	-647.587	338.918	-631.558	283.029	-604.433	439.868	-673.509	485.103	-651.473	525.96	-651.628	583.982	-651.857	51.8574	-77.5578	52.027	-86.2641	50.3169	-81.9068	45.2671
		6	426.183	-637.494	427.473	-708.733	413.32	-672.955	371.859	-647.629	338.775	-631.938	282.551	-605.273	439.964	-673.554	485.516	-651.781	526.502	-651.72	584.359	-651.634	426.228	-637.322	427.482	-708.798	413.455	-672.906	371.912	-647.816	338.823	-631.769	282.975	-604.681	439.917	-673.501	485.457	-651.56	526.323	-651.458	584.329	-651.316	51.8717	-77.5617	52.0243	-86.2603	50.3173	-81.8923	45.2615
LENGTH (mm)		7	426.282	-637.196	427.373	-708.733	413.543	-672.733	371.859	-648.19	338.484	-631.974	282.955	-604.992	439.964	-673.465	485.714	-651.98	526.89	-651.186	584.539	-650.075	426.386	-637.331	427.439	-708.795	413.537	-672.85	371.786	-648.181	338.667	-632.091	282.872	-604.989	439.97	-673.488	485.817	-651.827	526.543	-651.176	584.639	-650.23	51.8909	-77.5628	52.0191	-86.26	50.3272	-81.8855	45.2462
Body	10.1918	8	426.679	-637.295	427.373	-708.733	413.654	-672.844	371.719	-648.751	338.707	-632.642	282.888	-605.402	439.964	-673.289	486.283	-652.074	526.692	-651.285	585.107	-650.145	426.579	-637.347	427.388	-708.809	413.677	-672.857	371.494	-648.705	338.372	-632.658	282.524	-605.612	440.037	-673.509	486.221	-652.459	526.648	-650.918	584.914	-648.661	51.9145	-77.5647	52.0129	-86.2617	50.3443	-81.8864	45.2106
R. Femur	6.63693	9	426.778	-637.395	427.373	-708.932	413.766	-672.733	371.158	-649.453	337.927	-633.199	282.367	-606.022	440.141	-673.554	486.548	-653.312	526.493	-651.087	585.238	-647.815	426.784	-637.377	427.324	-708.804	413.848	-672.903	370.977	-649.405	337.83	-633.584	281.749	-606.829	440.125	-673.584	486.69	-653.667	526.758	-650.86	585.146	-646.735	51.9394	-77.5684	52.005	-86.261	50.3651	-81.8919	45.1477
R. Tibia	4.20642	10	426.977	-637.295	427.373	-708.733	414.211	-672.955	370.316	-650.295	337.148	-634.758	280.807	-608.365	440.229	-673.554	487.078	-654.461	526.593	-650.69	585.474	-645.071	426.992	-637.41	427.237	-708.732	414.013	-672.944	370.242	-650.315	337.01	-634.951	280.488	-608.824	440.225	-673.682	487.243	-655.562	527.009	-651.273	585.372	-644.97	51.9647	-77.5725	51.9945	-86.2523	50.3852	-81.897	45.0582
R. Tarsus	2.10277	11	427.175	-637.395	427.076	-708.733	414.323	-673.289	369.334	-651.277	336.257	-636.985	278.598	-612.071	440.318	-673.819	487.699	-657.734	527.188	-651.583	585.364	-642.52	427.198	-637.43	427.139	-708.57	414.127	-672.898	369.352	-651.479	335.925	-636.742	278.864	-611.561	440.328	-673.746	487.863	-658.091	527.456	-652.469	585.664	-644.219	51.9897	-77.5749	51.9826	-86.2326	50.399	-81.8914	44.9499
L. Femur	5.92807	12	427.373	-637.295	427.175	-708.138	414.1	-672.621	368.211	-652.68	334.364	-639.435	276.165	-616.66	440.406	-673.731	488.691	-662.001	528.279	-654.361	585.743	-643.271	427.392	-637.393	427.068	-708.312	414.193	-672.698	368.397	-652.926	334.646	-638.888	277.088	-614.881	440.425	-673.691	488.479	-660.91	528.027	-654.59	586.108	-645.323	52.0133	-77.5704	51.974	-86.2012	50.4071	-81.867	44.8338
L. Tibia	5.36792	13	427.671	-637.196	426.977	-707.84	414.1	-672.176	367.509	-654.785	333.473	-641.551	275.385	-618.965	440.583	-673.731	489.187	-664.283	528.676	-657.437	586.578	-647.399	427.557	-637.236	427.064	-707.978	414.27	-672.361	367.459	-654.628	333.313	-641.393	275.279	-618.817	440.507	-673.444	488.982	-663.593	528.582	-657.528	586.704	-648.624	52.0334	-77.5513	51.9735	-86.1605	50.4164	-81.8259	44.7196
L. Tarsus	1.85861	14	427.671	-637.196	426.977	-707.542	414.434	-671.842	366.668	-656.609	332.248	-643.221	274.547	-620.778	440.76	-673.112	489.385	-665.771	529.073	-660.81	587.465	-653.511	427.677	-636.867	427.182	-707.55	414.392	-671.898	366.575	-656.495	332.027	-644.413	273.337	-623.844	440.56	-672.963	489.316	-665.98	529.025	-661.071	587.348	-653.834	52.0481	-77.5064	51.9878	-86.1084	50.4312	-81.7697	44.612
		15	427.77	-636.204	427.197	-706.899	414.657	-671.396	365.685	-658.433	330.689	-647.342	271.461	-628.571	440.583	-671.786	489.385	-668.053	529.172	-665.474	588.022	-661.658	427.762	-636.2	427.452	-706.968	414.554	-671.274	365.791	-658.467	330.923	-648.098	271.203	-630.397	440.601	-672.279	489.487	-668.121	529.302	-664.957	587.891	-660.251	52.0585	-77.4252	52.0206	-86.0377	50.451	-81.6936	44.5166
mg	16.7	16	427.77	-635.013	428	-706.167	414.545	-670.728	365.264	-660.538	329.464	-652.687	268.715	-639.366	440.583	-671.167	489.485	-670.435	529.371	-668.946	588.259	-666.749	427.826	-635.223	427.836	-706.162	414.756	-670.432	365.171	-660.516	330.182	-652.296	269.112	-638.121	440.694	-671.448	489.523	-670.051	529.366	-668.888	588.212	-667.11	52.0662	-77.3062	52.0674	-85.9395	50.4756	-81.5912	44.4411
		17	427.969	-634.12	428.417	-705.167	415.102	-668.946	364.423	-662.081	329.798	-656.919	266.66	-647.505	440.583	-671.079	489.385	-671.03	529.073	-673.51	588.036	-677.196	427.88	-633.928	428.239	-705.041	415.014	-669.362	364.764	-662.617	329.904	-656.638	267.405	-646.139	440.904	-670.405	489.431	-671.8	529.145	-672.672	588.229	-673.927	52.0728	-77.1487	52.1164	-85.8031	50.507	-81.461	44.3916
		18	427.969	-632.434	428.583	-703.667	415.213	-668.278	364.703	-664.747	330.355	-661.485	266.303	-655.401	441.29	-668.604	488.989	-673.61	528.478	-675.792	587.681	-679.065	427.931	-632.273	428.595	-703.522	415.303	-668.1	364.615	-664.713	330.005	-660.815	266.304	-653.833	441.251	-669.03	489.199	-673.438	528.554	-676.209	587.868	-680.401	52.079	-76.9473	52.1598	-85.6183	50.5422	-81.3074	44.3734
		19	427.969	-630.152	429	-701.583	415.659	-666.051	365.124	-667.273	331.023	-665.494	266.415	-662.123	441.467	-667.72	488.889	-674.8	527.783	-679.662	586.969	-687.06	428.003	-630.258	428.89	-701.557	415.604	-666.617	364.702	-666.631	330.356	-664.644	265.839	-661.055	441.68	-667.318	488.792	-674.893	527.49	-679.567	587.003	-686.878	52.0878	-76.7021	52.1957	-85.3792	50.5788	-81.127	44.3841
		20	428.068	-628.068	429.083	-699.333	415.993	-665.16	365.264	-668.115	331.023	-667.61	266.432	-666.657	442.262	-665.156	488.294	-676.288	526.593	-682.638	585.806	-692.456	428.133	-627.922	429.124	-699.141	415.885	-664.869	365.029	-668.213	330.941	-668.156	266.033	-668.151	442.111	-665.229	488.131	-676.08	525.845	-682.774	585.45	-693.596	52.1035	-76.4178	52.2241	-85.0851	50.6129	-80.9142	44.4238
		21	428.167	-624.992	429.25	-696.333	416.327	-663.378	365.685	-669.097	331.357	-670.617	266.939	-673.468	442.704	-663.035	487.302	-676.884	523.616	-685.714	583.346	-700.239	428.346	-625.298	429.316	-696.292	416.126	-662.708	365.712	-669.441	331.918	-671.584	267.059	-675.716	442.429	-662.783	487.155	-676.917	523.613	-685.848	583.031	-700.695	52.1294	-76.0985	52.2475	-84.7383	50.6423	-80.6513	44.5069
		22	428.763	-622.313	429.583	-693.25	416.216	-660.037	366.214	-670.505	333.25	-674.848	268.217	-683.417	442.793	-659.676	485.913	-677.38	520.54	-688.393	580.107	-707.338	428.642	-622.43	429.48	-693.076	416.347	-660.06	366.944	-670.292	333.471	-675.03	269.209	-683.937	442.556	-660.023	485.854	-677.362	520.979	-688.774	579.661	-708.037	52.1656	-75.7494	52.2675	-84.347	50.6692	-80.329	44.6568
		23	429.06	-619.337	429.583	-689.083	416.55	-656.808	368.125	-671.125	336.034	-678.746	271.956	-693.964	442.351	-656.847	484.028	-677.38	517.779	-691.664	575.054	-715.905	428.985	-619.293	429.62	-689.592	416.614	-657.016	368.884	-670.673	335.647	-678.334	272.711	-692.376	442.499	-657.024	484.265	-677.377	518.143	-691.477	575.376	-715.28	52.2072	-75.3676	52.2845	-83.923	50.7018	-79.9585	44.893
		24	429.358	-616.162	429.75	-685.833	416.773	-653.689	371.25	-670.625	338.373	-680.973	276.967	-700.302	442.527	-654.107	482.333	-677	514.549	-694.114	569.624	-723.372	429.357	-615.819	429.756	-685.949	416.97	-653.691	371.481	-670.545	338.434	-681.264	277.521	-700.439	442.326	-653.788	482.431	-676.928	515.185	-693.797	570.311	-721.93	52.2526	-74.9448	52.301	-83.4797	50.745	-79.5538	45.209
		25	429.755	-612.193	429.917	-682.25	417.552	-650.014	375	-669.875	341.268	-684.203	284.024	-708.518	441.909	-650.218	480.833	-676.25	512.545	-695.673	565.122	-727.877	429.767	-611.965	429.904	-682.145	417.423	-650.147	374.456	-669.986	341.892	-683.654	283.334	-707.855	442.095	-650.273	480.342	-675.986	512.043	-695.615	564.513	-727.678	52.3024	-74.4758	52.3191	-83.0167	50.8001	-79.1226	45.5711
		26	430.052	-607.629	430.083	-678.333	417.886	-646.339	378.125	-668.625	345.277	-685.762	290.491	-714.345	441.82	-646.594	478.167	-674.5	508.759	-696.23	558.749	-731.74	430.226	-607.782	430.082	-678.127	417.941	-646.431	377.466	-669.115	346.054	-685.327	289.715	-714.451	441.893	-646.499	477.977	-674.555	508.516	-696.898	557.892	-732.59	52.3583	-73.9667	52.3407	-82.5277	50.8632	-78.6704	45.9374
		27	430.747	-603.263	430.25	-674	418.443	-642.776	380.375	-667.875	351.068	-686.319	296.72	-720.523	441.643	-642.704	475.667	-672.667	505.418	-698.012	550.908	-736.766	430.733	-603.38	430.305	-673.873	418.509	-642.552	380.316	-668	350.764	-686.238	296.4	-720.19	441.769	-642.495	475.433	-672.696	504.496	-697.604	550.504	-736.808	52.4199	-73.431	52.3678	-82.01	50.9323	-78.1982	46.2843
		28	431.441	-598.997	430.583	-669.083	419	-638.655	382.5	-667.125	356.08	-686.207	302.371	-724.999	441.732	-638.196	472.417	-670.167	500.74	-698.123	542.764	-739.602	431.246	-598.845	430.589	-669.42	419.099	-638.503	382.995	-666.587	355.669	-686.476	303.358	-725.068	441.74	-638.32	472.894	-670.477	500.012	-697.568	542.657	-740.294	52.4824	-72.8791	52.4024	-81.4681	51.0042	-77.7054	46.6103
		29	431.64	-593.937	430.917	-664.917	420.002	-634.09	385.625	-664.75	360.645	-685.873	310.15	-728.574	441.909	-633.865	470.417	-667.583	494.446	-696.43	533.679	-743.53	431.731	-594.233	430.938	-664.826	419.663	-634.331	385.514	-664.793	360.467	-686.161	310.619	-729.144	441.79	-634.08	470.576	-667.932	495.356	-696.71	534.807	-742.909	52.5414	-72.3178	52.4449	-80.909	51.0728	-77.1978	46.9169
		30	432.235	-589.571	431.25	-660.417	420.113	-629.524	388.25	-662.25	364.766	-685.317	317.733	-731.513	442.174	-629.533	468.667	-665.5	490.378	-695.14	527.075	-745.24	432.191	-589.612	431.348	-660.086	420.144	-630.12	387.783	-662.651	364.976	-685.337	317.979	-732.453	441.9	-629.852	468.595	-665.008	490.986	-695.084	527.394	-744.392	52.5974	-71.7555	52.4948	-80.3321	51.1314	-76.6852	47.1929
		31	432.533	-585.007	431.833	-655.333	420.67	-626.74	389.875	-659.75	369.555	-683.98	326.36	-735.485	441.643	-625.998	467	-661.833	487.302	-692.66	521.366	-744.382	432.622	-584.991	431.806	-655.213	420.555	-625.869	389.732	-660.188	369.066	-683.968	325.059	-734.837	442.093	-625.641	467.005	-661.581	487.161	-692.716	520.588	-744.631	52.6499	-71.193	52.5506	-79.7391	51.1813	-76.1679	47.4302
		32	433.128	-580.344	432.333	-649.667	420.67	-621.06	390.875	-657.75	373.118	-682.31	332.962	-737.85	442.351	-621.224	465.667	-658	483.928	-690.874	513.666	-744.406	433.022	-580.349	432.278	-650.311	420.927	-621.481	391.416	-657.318	372.597	-681.995	331.47	-735.934	442.436	-621.384	465.869	-657.633	483.958	-689.623	514.465	-743.728	52.6986	-70.6282	52.608	-79.1425	51.2266	-75.6339	47.6351
		33	433.426	-575.581	432.75	-645.333	421.338	-616.94	393	-654.75	375.234	-679.637	335.571	-735.198	442.881	-616.716	464.917	-653.25	480.853	-685.317	508.905	-741.766	433.376	-575.672	432.731	-645.49	421.302	-616.996	392.916	-653.852	375.556	-679.382	337.19	-735.581	442.903	-617.075	465.24	-653.254	481.449	-685.888	509.218	-741.816	52.7416	-70.0589	52.6631	-78.5558	51.2722	-75.0881	47.8176
		34	433.922	-571.116	433.167	-640.917	421.673	-612.931	394.25	-650	378.018	-676.408	342.49	-734.208	443.677	-613.446	465	-648.417	479.662	-681.746	504.802	-738.892	433.69	-570.935	433.15	-640.713	421.671	-612.408	394.202	-649.727	378.061	-676.178	342.518	-734.068	443.423	-612.67	465.109	-648.629	479.674	-681.838	504.882	-739.165	52.7799	-69.4825	52.7141	-77.9745	51.3171	-74.5298	47.9742
		35	433.823	-566.254	433.583	-636.167	422.007	-607.474	395.25	-645	380.468	-672.176	348.02	-731.829	443.853	-607.877	465.25	-643.417	478.174	-676.288	501.416	-735.406	434.002	-566.105	433.527	-635.883	422.02	-607.702	395.238	-645.127	380.182	-672.521	347.47	-731.715	443.93	-608.081	465.371	-643.953	478.536	-677.739	501.372	-736.057	52.8178	-68.8947	52.76	-77.3866	51.3596	-73.957	48.1002
		36	434.021	-561.294	433.917	-631.167	422.341	-602.908	396.375	-639.5	381.693	-668.501	351.73	-727.686	444.472	-603.28	466.083	-639.25	477.876	-673.808	498.005	-732.797	434.394	-561.195	433.862	-630.954	422.336	-602.964	396.001	-640.338	381.978	-668.596	351.992	-728.857	444.41	-603.361	465.876	-639.34	477.879	-673.72	498.571	-732.67	52.8655	-68.2971	52.8008	-76.7867	51.3981	-73.3804	48.1931
		37	434.815	-556.233	434.167	-625.583	422.786	-598.119	396.5	-635	383.364	-664.269	356.027	-725.177	445.002	-598.33	466.833	-634.417	477.975	-670.137	496.266	-728.776	434.9	-556.264	434.173	-625.97	422.603	-598.258	396.498	-635.587	383.552	-664.516	356.14	-725.798	444.848	-598.558	466.449	-634.768	477.464	-669.581	496.331	-729.028	52.9271	-67.6971	52.8386	-76.1802	51.4306	-72.8077	48.2536
		38	435.708	-551.173	434.417	-620.917	422.898	-593.553	396.75	-631.5	385.145	-660.594	360.13	-723.31	445.179	-594.176	466.997	-630.526	477.578	-665.275	495.789	-725.083	435.453	-551.404	434.492	-621.017	422.818	-593.611	396.818	-630.869	384.951	-660.341	359.936	-722.547	445.25	-593.677	466.978	-630.139	477.063	-665.088	494.378	-725.132	52.9944	-67.1056	52.8774	-75.5775	51.4567	-72.2422	48.2926
		39	436.105	-546.411	434.75	-616.167	422.675	-589.21	396.75	-626.625	386.259	-656.028	363.534	-719.72	445.533	-588.43	467.419	-625.799	476.288	-660.81	491.693	-721.616	435.963	-546.689	434.848	-616.101	423.02	-589.015	397.072	-626.035	386.173	-656.08	363.372	-718.947	445.653	-588.696	467.452	-625.298	476.588	-660.154	492.471	-720.931	53.0564	-66.5318	52.9208	-74.9791	51.4813	-71.6828	48.3235
		40	436.502	-542.144	435.25	-611.333	423.343	-584.199	397.375	-620.375	387.261	-651.574	366.894	-714.401	446.063	-583.657	467.98	-620.468	476.189	-654.857	490.93	-716.61	436.396	-542.125	435.25	-611.184	423.261	-584.45	397.335	-621.079	387.253	-651.787	366.485	-715.025	446.084	-583.675	467.881	-620.182	476.085	-654.799	490.64	-716.384	53.1092	-65.9763	52.9697	-74.3807	51.5106	-71.1272	48.3554
		41	436.601	-537.878	435.75	-606.167	423.566	-580.078	397.625	-616.25	388.041	-647.564	368.697	-710.766	446.594	-578.618	468.167	-614.294	475.495	-648.507	488.867	-710.946	436.776	-537.643	435.676	-606.248	423.521	-579.923	397.606	-616.126	388.259	-647.502	369.387	-710.991	446.534	-578.644	468.278	-614.882	475.564	-649.208	488.836	-711.621	53.1554	-65.4308	53.0216	-73.78	51.5423	-70.5764	48.3884
[truncated: 198 more columns]

## Sheet: C0053
			RAW COORDINATES																				SPLINE																				mm
			HEAD		TAIL		LEFT COXAE		LEFT FT		LEFT TT		LEFT TIP		RIGHT COXAE		RIGHT FT		RIGHT TT		RIGHT TIP		HEAD		TAIL		LEFT COXAE		LEFT FT		LEFT TT		LEFT TIP		RIGHT COXAE		RIGHT FT		RIGHT TT		RIGHT TIP		HEAD		TAIL		LEFT COXAE		LEFT FT
SCALE		Frame	X	Y	X	Y	X	Y	X	Y	X	Y	X	Y	X	Y	X	Y	X	Y	X	Y	X	Y	X	Y	X	Y	X	Y	X	Y	X	Y	X	Y	X	Y	X	Y	X	Y	X	Y	X	Y	X	Y	X
X	Y	-2	-11.5073	210.499	-6.4553	286.279	-17.1704	249.207	-64.0079	223.143	-105.029	217.485	-162.979	210.563	1.58765	246.284	30.7662	211.827	51.9843	195.56	110.43	148.327	-11.5838	210.251	-6.52889	286.253	-17.1378	249.081	-63.0334	223.645	-105.606	216.974	-163.148	209.13	1.57574	246.568	30.5939	211.822	51.5261	195.415	109.893	148.314	-1.49534	27.1412	-0.842811	36.9523	-2.21231	32.1538	-8.13695
456.642	342.412	-1	-11.5073	210.499	-6.4553	286.279	-17.1704	249.207	-64.0079	223.143	-105.029	217.485	-162.979	210.563	1.58765	246.284	30.7662	211.827	51.9843	195.56	110.43	148.327	-11.5838	210.251	-6.52889	286.253	-17.1378	249.081	-63.0334	223.645	-105.606	216.974	-163.148	209.13	1.57574	246.568	30.5939	211.822	51.5261	195.415	109.893	148.314	-1.49534	27.1412	-0.842811	36.9523	-2.21231	32.1538	-8.13695
456.081	264.948	0	-11.5073	210.499	-6.4553	286.279	-17.1704	249.207	-64.0079	223.143	-105.029	217.485	-162.979	210.563	1.58765	246.284	30.7662	211.827	51.9843	195.56	110.43	148.327	-11.5838	210.251	-6.52889	286.253	-17.1378	249.081	-63.0334	223.645	-105.606	216.974	-163.148	209.13	1.57574	246.568	30.5939	211.822	51.5261	195.415	109.893	148.314	-1.49534	27.1412	-0.842811	36.9523	-2.21231	32.1538	-8.13695
		1	-11.5073	210.499	-6.4553	286.279	-17.1704	249.207	-64.0079	223.143	-105.029	217.485	-162.979	210.563	1.58765	246.284	30.7662	211.827	51.9843	195.56	110.43	148.327	-11.5838	210.251	-6.52889	286.253	-17.1378	249.081	-63.0334	223.645	-105.606	216.974	-163.148	209.13	1.57574	246.568	30.5939	211.822	51.5261	195.415	109.893	148.314	-1.49534	27.1412	-0.842811	36.9523	-2.21231	32.1538	-8.13695
DISTANCE (mm)		2	-12.0686	209.376	-6.4553	285.717	-17.1704	249.207	-61.5324	225.265	-106.444	217.132	-163.264	207.991	1.58765	246.681	31.1198	211.827	51.277	195.914	109.508	149.377	-11.7078	210.146	-6.42252	286.105	-17.1856	249.011	-62.4008	224.456	-104.871	217.218	-162.754	208.106	1.53846	246.307	30.7874	212.326	51.6795	195.616	109.473	147.839	-1.51136	27.1276	-0.829079	36.9332	-2.21849	32.1447	-8.05528
pixel	mm	3	-11.5073	210.499	-6.4553	286.279	-17.1704	248.576	-61.8861	225.265	-102.2	217.485	-162.729	205.807	1.58765	246.284	30.7662	213.242	51.9843	195.56	109.789	147.857	-11.8296	210.058	-6.30652	285.951	-17.2378	248.963	-61.8854	225.215	-104.091	217.533	-162.348	207.282	1.50402	246.015	31.0131	212.819	51.8881	195.845	109.129	147.401	-1.52707	27.1162	-0.814105	36.9133	-2.22522	32.1385	-7.98876
77.4656	10	4	-12.0686	209.938	-5.89397	285.717	-17.4854	248.576	-61.1788	225.972	-105.029	217.485	-161.815	207.205	1.19074	245.888	31.1198	213.595	52.6916	195.56	108.15	145.446	-11.9731	209.941	-6.17786	285.758	-17.2954	248.969	-61.5228	225.948	-103.326	217.978	-161.976	206.812	1.48186	245.702	31.3286	213.253	52.1716	196.15	108.958	147.196	-1.5456	27.1011	-0.797496	36.8883	-2.23265	32.1392	-7.94195
1	0.12909	5	-12.0686	209.938	-6.4553	285.717	-17.1704	249.207	-61.5324	225.619	-102.554	218.193	-160.901	206.477	1.58765	244.697	31.4735	213.595	52.6916	196.267	108.176	147.124	-12.1435	209.772	-6.03739	285.508	-17.3592	249.017	-61.3178	226.715	-102.533	218.602	-161.734	206.72	1.48254	245.425	31.7746	213.615	52.5601	196.549	109.108	147.457	-1.56759	27.0794	-0.779364	36.8561	-2.24089	32.1455	-7.91548
		6	-12.0686	209.376	-6.4553	285.717	-17.4854	248.891	-60.8251	227.387	-101.139	219.961	-162.488	208.261	1.19074	245.094	32.1807	213.595	51.6306	197.682	109.313	147.386	-12.3429	209.549	-5.88942	285.204	-17.4347	249.063	-61.2564	227.512	-101.788	219.378	-161.663	207.018	1.49796	245.217	32.3461	213.936	53.1432	196.98	109.608	148.244	-1.59334	27.0505	-0.760263	36.8169	-2.25064	32.1514	-7.90755
LENGTH (mm)		7	-12.6299	209.376	-4.77131	283.472	-17.4854	249.207	-61.5324	228.802	-100.079	220.668	-160.854	207.44	1.98456	245.094	33.5953	214.303	54.1061	198.035	111.973	150.734	-12.5662	209.269	-5.75898	284.866	-17.5261	249.053	-61.3137	228.292	-101.193	220.266	-161.788	207.747	1.5093	245.088	33.0204	214.243	53.9921	197.373	110.43	149.545	-1.62216	27.0144	-0.743424	36.7732	-2.26244	32.1502	-7.91495
Body	10.193	8	-13.1913	209.376	-5.33264	285.717	-17.8005	249.207	-61.1788	230.216	-100.432	220.668	-161.39	207.323	1.58765	245.094	32.5344	214.656	54.8134	196.974	108.859	148.719	-12.7794	208.929	-5.72791	284.541	-17.6296	248.936	-61.4431	228.942	-100.762	221.267	-162.137	209.042	1.4868	244.991	33.7528	214.534	55.046	197.723	111.495	151.271	-1.64969	26.9705	-0.739414	36.7313	-2.27579	32.1351	-7.93166
R. Femur	6.25924	9	-12.6299	208.254	-5.33264	283.472	-17.4854	249.207	-61.5324	229.155	-101.493	222.436	-162.356	210.384	1.19074	245.094	35.7171	214.656	56.5815	198.389	113.842	153.946	-12.9619	208.541	-5.78941	284.192	-17.7472	248.669	-61.6008	229.435	-100.371	222.422	-162.665	211.008	1.44207	244.885	34.5113	214.807	56.2091	198.085	112.798	153.366	-1.67325	26.9205	-0.747352	36.6862	-2.29098	32.1005	-7.95202
R. Tibia	4.9928	10	-13.7526	207.692	-7.57796	284.595	-18.1155	247.946	-61.8861	229.862	-100.786	223.143	-163.421	212.57	1.19074	244.3	35.0098	215.363	59.057	198.035	115.883	156.986	-13.1122	208.146	-5.84702	283.814	-17.8798	248.27	-61.7185	229.859	-99.9082	223.726	-163.213	213.54	1.39152	244.749	35.239	215.064	57.3895	198.48	114.19	155.595	-1.69265	26.8695	-0.754789	36.6374	-2.30809	32.0491	-7.96722
R. Tarsus	2.50778	11	-12.6299	208.254	-5.89397	283.472	-17.8005	247.946	-62.947	229.155	-99.3713	225.265	-164.99	217.695	1.58765	245.094	35.7171	215.01	57.6424	199.096	115.705	159.286	-13.2422	207.773	-5.81989	283.422	-18.0283	247.779	-61.7238	230.324	-99.3153	225.146	-163.599	216.448	1.34048	244.565	35.8866	215.313	58.5422	198.911	115.535	157.719	-1.70943	26.8213	-0.751286	36.5868	-2.32727	31.9856	-7.96789
L. Femur	6.30927	12	-13.7526	207.131	-4.77131	282.349	-18.1155	247.001	-61.8861	230.923	-96.8959	227.033	-164.575	220.163	1.19074	244.3	36.778	216.071	59.057	199.45	115.262	159.328	-13.3887	207.402	-5.7634	283.061	-18.1943	247.238	-61.5841	230.893	-98.6882	226.601	-163.676	219.441	1.26524	244.295	36.4556	215.571	59.782	199.36	116.925	159.699	-1.72834	26.7735	-0.743994	36.5402	-2.3487	31.9159	-7.94985
L. Tibia	5.0591	13	-13.7526	207.131	-5.33264	282.911	-18.7456	247.001	-60.1179	231.631	-98.664	228.094	-164.963	222.127	1.19074	243.903	36.778	215.363	61.1788	199.45	117.409	159.69	-13.5577	207.044	-5.76179	282.789	-18.3641	246.691	-61.394	231.524	-98.0957	228.013	-163.453	222.346	1.16146	243.939	36.9218	215.85	61.1571	199.819	118.462	161.667	-1.75016	26.7272	-0.743787	36.5051	-2.37061	31.8452	-7.92532
L. Tarsus	2.25821	14	-13.1913	206.008	-7.01663	281.788	-18.4306	245.741	-61.1788	231.984	-99.3713	228.448	-160.531	223.369	1.19074	243.903	37.4853	216.424	62.5933	200.864	121.399	165.484	-13.7856	206.705	-5.7853	282.61	-18.5209	246.172	-61.2764	232.154	-97.4324	229.362	-163.122	225.1	1.02248	243.508	37.2817	216.185	62.627	200.276	120.054	163.69	-1.77957	26.6834	-0.746821	36.482	-2.39085	31.7783	-7.91014
		15	-13.7526	206.57	-5.33264	282.911	-18.7456	245.426	-61.8861	233.399	-95.4813	231.984	-162.827	231.115	0.396913	242.712	37.8389	216.071	64.0079	200.864	122.374	164.814	-14.0981	206.348	-5.8175	282.469	-18.6766	245.713	-61.2349	232.719	-96.7284	230.586	-162.872	227.527	0.85364	243.03	37.5392	216.595	64.1345	200.724	121.557	165.753	-1.81992	26.6373	-0.750978	36.4638	-2.41096	31.719	-7.90479
mg	17.7	16	-14.8753	206.008	-5.89397	282.349	-18.7456	244.796	-61.1788	233.399	-96.5422	231.984	-163.396	231.721	0.793826	242.315	36.778	217.132	65.4224	201.925	124.427	169.748	-14.4969	205.919	-5.86435	282.297	-18.8504	245.331	-61.2546	233.17	-96.0635	231.628	-162.838	229.469	0.655604	242.542	37.7085	217.081	65.6179	201.172	122.868	167.836	-1.8714	26.582	-0.757025	36.4416	-2.43339	31.6697	-7.90733
		17	-14.8753	206.57	-5.33264	282.349	-19.0607	245.426	-61.8861	233.399	-95.1277	232.338	-162.765	229.784	0.793826	241.521	38.5462	217.485	67.5442	200.864	122.904	168.857	-14.9222	205.345	-5.96392	282.017	-19.0598	244.977	-61.3743	233.513	-95.5346	232.512	-162.999	231.05	0.400141	242.07	37.8232	217.612	66.9976	201.695	124.083	169.988	-1.9263	26.5078	-0.769879	36.4054	-2.46042	31.6239	-7.92277
		18	-15.4366	204.324	-6.4553	282.349	-19.0607	245.426	-61.1788	234.106	-93.7132	232.692	-162.728	229.479	-0.396913	242.315	37.8389	218.9	67.8978	202.279	124.72	172.74	-15.3457	204.602	-6.11552	281.573	-19.3174	244.548	-61.6586	233.791	-95.2407	233.341	-163.413	232.71	0.0735374	241.587	37.8518	218.137	68.1882	202.421	125.43	172.368	-1.98097	26.412	-0.789449	36.3481	-2.49367	31.5686	-7.95948
		19	-15.9979	203.202	-6.4553	280.104	-19.6908	243.851	-61.5324	233.752	-95.835	234.46	-163.389	235.291	0.793826	241.125	37.8389	218.193	70.3733	202.986	126.907	174.567	-15.7499	203.769	-6.28065	280.992	-19.6178	244.03	-62.1885	234.059	-95.1569	234.166	-164.086	234.621	-0.327373	241.053	37.8063	218.641	69.1338	203.405	127.017	175.096	-2.03315	26.3044	-0.810765	36.2732	-2.53245	31.5017	-8.02788
		20	-15.9979	203.202	-7.01663	281.227	-20.0058	243.221	-62.947	234.106	-96.1886	234.46	-164.799	234.696	-1.19074	240.728	37.8389	219.253	70.0196	202.633	126.064	172.65	-16.1241	202.929	-6.42246	280.316	-19.9475	243.444	-63.0248	234.376	-95.2119	235.022	-164.978	236.825	-0.786381	240.446	37.719	219.123	69.8089	204.672	128.9	178.269	-2.08145	26.196	-0.829072	36.1858	-2.57501	31.426	-8.13584
		21	-16.5593	202.079	-6.4553	278.981	-20.6359	242.59	-62.5933	234.813	-95.1277	236.228	-166.255	241.073	-1.98456	239.537	36.4244	219.607	70.3733	207.23	131.825	184.933	-16.4844	202.101	-6.55572	279.571	-20.2856	242.843	-64.1342	234.783	-95.3244	235.916	-165.936	239.176	-1.22087	239.799	37.6254	219.592	70.2924	206.148	131.01	181.822	-2.12797	26.0892	-0.846274	36.0897	-2.61865	31.3485	-8.27905
		22	-16.5593	201.518	-5.89397	278.42	-20.0058	242.275	-65.776	234.813	-94.4204	237.289	-167.729	244.218	-1.58765	238.743	39.2534	219.253	69.3124	208.998	133.787	187.881	-16.8446	201.317	-6.75825	278.834	-20.6352	242.243	-65.426	235.291	-95.543	236.816	-166.778	241.389	-1.57318	239.168	37.5281	220.057	70.7308	207.57	133.026	185.193	-2.17446	25.9879	-0.87242	35.9946	-2.66379	31.2711	-8.44581
		23	-17.1206	199.834	-7.01663	278.42	-21.266	241.96	-67.8978	234.46	-97.2495	238.35	-167.812	246.396	-1.19074	238.743	37.8389	220.668	71.4342	209.705	136.898	190.481	-17.2043	200.624	-7.05764	278.118	-20.9945	241.631	-66.6841	235.878	-95.8505	237.74	-167.408	243.489	-1.86772	238.562	37.4283	220.483	71.1943	208.819	134.688	188.149	-2.22089	25.8985	-0.911068	35.9021	-2.71017	31.192	-8.60822
		24	-17.6819	199.834	-7.01663	277.297	-21.266	241.015	-68.2515	238.703	-95.835	237.642	-167.489	241.142	-2.38148	237.949	36.4244	221.729	71.0806	209.352	137.001	189.454	-17.5531	200.06	-7.44831	277.417	-21.3538	240.996	-67.6967	236.472	-96.2173	238.741	-167.782	245.71	-2.13212	237.974	37.3688	220.809	71.7103	209.873	135.832	190.68	-2.26592	25.8256	-0.961499	35.8117	-2.75656	31.11	-8.73893
		25	-18.2432	199.272	-8.70062	276.736	-22.2112	240.07	-69.3124	236.935	-97.9568	239.411	-167.589	244.826	-2.77839	237.155	36.4244	221.022	72.4951	211.12	136.541	193.829	-17.8576	199.593	-7.85588	276.725	-21.6876	240.363	-68.4022	236.892	-96.6672	239.933	-167.944	248.633	-2.33641	237.385	37.5181	220.966	72.2247	210.87	136.578	193.136	-2.30524	25.7654	-1.01411	35.7223	-2.79964	31.0283	-8.83001
		26	-18.2432	199.834	-8.70062	275.613	-21.5811	239.755	-68.2515	236.935	-95.835	241.532	-167.041	250.91	-2.38148	236.759	38.5462	221.022	72.8487	210.413	135.078	191.552	-18.1067	199.143	-8.19277	276.034	-21.9868	239.757	-68.8375	237.137	-97.2616	241.327	-167.904	252.359	-2.46861	236.78	37.922	220.983	72.6503	211.912	137.2	195.796	-2.33739	25.7073	-1.0576	35.6331	-2.83826	30.9501	-8.8862
		27	-18.2432	198.711	-8.13929	275.613	-22.2112	239.125	-67.8978	237.289	-96.1886	242.24	-168.837	258.611	-2.38148	236.759	38.1925	221.022	73.9096	213.242	137.131	198.711	-18.3324	198.61	-8.45594	275.323	-22.281	239.178	-69.1367	237.259	-98.1611	242.868	-167.6	256.466	-2.56397	236.11	38.5192	220.915	72.9052	213.077	137.956	198.879	-2.36652	25.6384	-1.09157	35.5413	-2.87624	30.8754	-8.92482
		28	-18.2432	198.15	-8.70062	275.052	-22.8413	238.495	-70.0196	236.935	-99.3713	244.008	-169.333	261.785	-2.77839	235.171	39.2534	220.668	72.8487	214.656	137.846	202.091	-18.5835	197.956	-8.69031	274.549	-22.5692	238.615	-69.3225	237.292	-99.2965	244.467	-166.956	260.442	-2.64869	235.365	39.2608	220.83	72.9958	214.317	138.847	202.207	-2.39894	25.5541	-1.12183	35.4414	-2.91345	30.8026	-8.94881
		29	-18.8046	197.588	-8.70062	273.368	-22.8413	237.865	-70.3733	237.996	-101.139	247.191	-164.717	265.878	-2.77839	234.377	39.9607	221.022	72.8487	215.717	140.249	207.925	-18.9005	197.17	-8.94174	273.682	-22.8451	238.052	-69.3761	237.261	-100.499	246.011	-165.977	263.847	-2.74322	234.548	40.1011	220.798	72.9651	215.56	139.777	205.494	-2.43986	25.4526	-1.15428	35.3295	-2.94906	30.73	-8.95572
		30	-19.3659	195.343	-9.26195	272.807	-22.8413	237.235	-68.9587	236.935	-102.554	248.251	-163.759	267.808	-2.77839	233.98	40.668	219.961	73.9096	216.778	141.954	209.746	-19.2841	196.274	-9.23144	272.751	-23.1233	237.454	-69.29	237.174	-101.498	247.328	-164.94	266.552	-2.86974	233.684	40.9696	220.883	72.9026	216.783	140.511	208.492	-2.48937	25.3369	-1.19168	35.2093	-2.98497	30.6528	-8.94462
		31	-19.3659	195.343	-9.26195	272.245	-23.4714	237.865	-68.6051	236.935	-103.261	248.605	-163.826	269.032	-2.77839	232.393	42.4361	221.022	72.8487	218.193	142.47	212.545	-19.7241	195.31	-9.56501	271.758	-23.4181	236.751	-69.1771	237.097	-102.115	248.373	-164.02	268.654	-3.05916	232.779	41.772	221.147	72.8979	217.983	140.86	211.196	-2.54617	25.2125	-1.23474	35.0812	-3.02304	30.5621	-8.93004
		32	-20.4886	194.782	-10.9459	270	-23.7865	236.289	-69.3124	237.289	-102.2	248.959	-163.439	270.437	-3.1753	231.996	42.7898	221.022	70.3733	218.9	140.874	210.719	-20.1937	194.246	-9.92617	270.738	-23.7206	235.917	-69.1081	237.08	-102.364	249.233	-163.24	270.44	-3.31712	231.84	42.4252	221.561	73.1284	219.169	140.889	213.859	-2.6068	25.0751	-1.28136	34.9494	-3.06208	30.4544	-8.92113
		33	-21.0499	193.659	-9.26195	270	-24.4166	234.084	-68.6051	236.228	-102.908	250.02	-162.065	269.544	-4.36604	231.599	43.4971	222.79	73.9096	220.314	138.688	215.048	-20.6618	193.04	-10.3126	269.722	-24.0185	234.969	-69.1279	237.165	-102.314	250.016	-162.592	272.241	-3.63362	230.871	42.8686	222.057	73.7312	220.354	140.748	216.742	-2.66722	24.9194	-1.33125	34.8182	-3.10053	30.332	-8.92368
		34	-21.0499	191.975	-10.3846	268.877	-23.7865	233.769	-69.3124	237.289	-100.432	250.02	-160.796	274.206	-3.57222	229.217	43.4971	222.436	73.556	222.083	140.588	222.02	-21.1119	191.718	-10.7745	268.712	-24.3183	234.007	-69.254	237.386	-102.107	250.818	-162.063	274.347	-3.98501	229.882	43.1344	222.527	74.5827	221.539	140.64	219.85	-2.72533	24.7487	-1.39088	34.6879	-3.13924	30.2079	-8.93996
		35	-21.0499	189.73	-11.5073	267.193	-24.7316	233.769	-68.6051	237.996	-101.493	251.434	-163.12	275.973	-4.36604	228.423	41.7289	223.497	76.3851	222.79	140.233	224.603	-21.5784	190.388	-11.2785	267.722	-24.6523	233.036	-69.4748	237.684	-101.894	251.714	-161.553	276.796	-4.40674	228.95	43.3399	222.913	75.4796	222.722	140.561	222.98	-2.78555	24.5771	-1.45593	34.5601	-3.18235	30.0825	-8.96847
		36	-22.1726	188.607	-12.6299	267.193	-25.3617	231.249	-70.7269	237.996	-101.847	253.202	-160.682	281.911	-4.76295	228.026	42.0825	223.143	77.0923	222.79	140.588	222.875	-22.0658	189.159	-11.7442	266.756	-25.0163	232.06	-69.7174	237.993	-101.65	252.682	-160.925	279.496	-4.91026	228.074	43.5499	223.199	76.1823	223.956	140.429	226.193	-2.84846	24.4184	-1.51606	34.4354	-3.22934	29.9565	-8.99979
		37	-22.7339	188.046	-12.6299	264.948	-25.0467	231.249	-71.4342	238.703	-101.847	253.202	-160.617	280.562	-5.55678	228.026	44.9116	223.497	77.446	226.326	139.787	232.53	-22.5606	188.105	-12.1107	265.812	-25.4051	231.087	-69.9027	238.254	-101.307	253.687	-160.065	282.381	-5.49201	227.217	43.747	223.39	76.4806	225.285	140.158	229.583	-2.91234	24.2823	-1.56336	34.3135	-3.27953	29.8309	-9.02371
		38	-23.2952	186.362	-11.5073	264.948	-25.3617	230.618	-68.6051	238.35	-101.847	254.971	-158.489	284.32	-5.95369	226.042	44.558	223.143	77.0923	225.972	141.18	231.403	-23.0308	187.208	-12.4273	264.877	-25.8423	230.095	-70.0286	238.438	-100.8	254.713	-158.946	285.516	-6.13379	226.322	43.701	223.524	76.3302	226.668	139.645	233.1	-2.97303	24.1666	-1.60424	34.1928	-3.33597	29.7029	-9.03995
		39	-23.2952	186.362	-12.0686	264.948	-27.252	229.043	-69.666	239.057	-100.079	256.031	-158.936	288.086	-6.74752	225.645	43.8507	223.497	75.6778	228.448	139.45	236.726	-23.4741	186.418	-12.7895	263.872	-26.3139	229.068	-70.2361	238.554	-100.15	255.718	-157.563	288.833	-6.81611	225.407	43.2931	223.631	75.8077	228.12	138.794	236.84	-3.03026	24.0646	-1.65098	34.0631	-3.39684	29.5702	-9.06674
		40	-23.8565	186.362	-13.7526	263.264	-26.3069	227.468	-71.4342	238.35	-98.664	256.739	-154.91	294.273	-7.54135	224.454	43.4971	223.851	73.9096	227.741	137.945	237.227	-23.914	185.595	-13.1953	262.727	-26.7787	228.043	-70.546	238.628	-99.4931	256.683	-155.921	292.069	-7.50209	224.49	42.5162	223.706	75.0932	229.641	137.659	240.841	-3.08705	23.9583	-1.70338	33.9153	-3.45685	29.438	-9.10675
		41	-24.4179	185.8	-14.3139	260.457	-27.252	227.468	-71.0806	237.996	-97.9568	257.092	-154.091	295.762	-8.33517	222.867	40.3143	223.851	74.2633	233.045	134.931	248.702	-24.3596	184.621	-13.5889	261.507	-27.2433	227.036	-70.9474	238.714	-98.9334	257.623	-154.081	295	-8.14655	223.6	41.4975	223.729	74.2977	231.123	136.411	244.86	-3.14457	23.8326	-1.75418	33.7578	-3.51683	29.3079	-9.15857
		42	-24.9792	184.116	-13.1913	260.457	-27.5671	225.578	-71.0806	239.411	-98.3104	258.507	-152.324	298.624	-9.129	223.264	39.6071	223.851	73.556	232.692	135.092	248.98	-24.8151	183.432	-13.9333	260.297	-27.7197	226.047	-71.4508	238.851	-98.5214	258.556	-152.102	297.482	-8.70846	222.753	40.3846	223.688	73.4871	232.449	135.209	248.619	-3.20336	23.6791	-1.79864	33.6016	-3.57832	29.1803	-9.22355
		43	-24.9792	180.748	-14.8753	259.335	-28.8273	224.947	-70.3733	238.35	-98.3104	259.214	-149.041	299.034	-9.129	222.073	38.8998	222.79	72.4951	233.045	133.892	250.728	-25.2903	182.139	-14.278	259.12	-28.1874	225.074	-72.1261	239.005	-98.157	259.448	-149.983	299.607	-9.17707	221.91	39.2562	223.592	72.6509	233.566	134.092	251.98	-3.26471	23.5123	-1.84314	33.4497	-3.6387	29.0547	-9.31072
		44	-25.5405	180.187	-14.3139	256.528	-28.5123	224.317	-73.2024	239.057	-99.0177	260.982	-149.223	301.269	-9.52591	220.088	38.1925	223.851	72.1415	235.521	132.24	257.125	-25.808	180.915	-14.6315	258.006	-28.6326	224.079	-72.9597	239.167	-97.6966	260.235	-147.72	301.56	-9.58465	221.071	38.0714	223.446	71.7884	234.486	133.048	254.916	-3.33154	23.3542	-1.88877	33.3058	-3.69617	28.9263	-9.41833
		45	-26.6632	180.187	-14.3139	258.212	-28.5123	223.372	-74.2633	239.411	-96.5422	260.982	-143.912	303.258	-9.92282	220.485	37.4853	223.143	70.7269	234.813	131.829	257.615	-26.3485	179.767	-15.0203	256.913	-29.0912	223.017	-73.7778	239.274	-97.0897	260.879	-145.318	303.479	-9.96527	220.205	36.7434	223.208	70.9097	235.243	131.998	257.43	-3.40131	23.2061	-1.93897	33.1647	-3.75537	28.7891	-9.52394
		46	-26.6632	178.503	-15.9979	255.967	-29.4574	221.797	-75.6778	240.472	-97.2495	261.69	-144.514	303.457	-10.3197	220.485	37.8389	223.851	70.0196	235.874	131.643	259.876	-26.8829	178.66	-15.4584	255.784	-29.5955	221.855	-74.3869	239.244	-96.322	261.362	-142.78	305.478	-10.3487	219.255	35.201	222.83	70.027	235.884	130.822	259.574	-3.4703	23.0631	-1.99552	33.0191	-3.82047	28.6392	-9.60257
		47	-27.7859	177.942	-15.9979	254.283	-30.7176	221.167	-74.9705	238.703	-94.7741	261.336	-139.347	308.281	-10.3197	217.707	32.888	222.436	69.3124	235.874	130.908	258.812	-27.3899	177.543	-15.8849	254.598	-30.113	220.61	-74.6843	239.032	-95.4332	261.734	-140.112	307.58	-10.7564	218.161	33.5112	222.307	69.159	236.483	129.353	261.565	-3.53575	22.9189	-2.05057	32.8659	-3.88727	28.4784	-9.64095
		48	-28.3472	176.258	-16.5593	253.16	-30.7176	218.961	-74.9705	238.703	-94.7741	262.043	-137.147	309.466	-11.5105	216.913	30.7662	221.022	67.5442	236.935	128.017	263.733	-27.847	176.381	-16.2794	253.384	-30.5996	219.31	-74.7046	238.705	-94.5091	262.058	-137.417	309.632	-11.1963	216.98	31.9915	221.728	68.3189	237.075	127.545	263.569	-3.59475	22.7689	-2.1015	32.7093	-3.95008	28.3106	-9.64358
		49	-27.2245	175.696	-16.5593	252.599	-30.7176	217.386	-74.2633	237.996	-92.6523	262.043	-134.85	312.298	-11.9074	215.722	28.6444	220.668	67.8978	237.642	125.398	265.408	-28.2857	175.163	-16.6523	252.141	-31.0713	218.033	-74.5491	238.331	-93.6104	262.373	-134.761	311.489	-11.6392	215.757	30.9571	221.206	67.5125	237.637	125.526	265.502	-3.65138	22.6117	-2.14963	32.5488	-4.01097	28.1458	-9.6235
		50	-28.9085	173.451	-16.5593	250.353	-31.3477	217.386	-73.556	237.642	-93.7132	262.75	-132.549	311.926	-11.9074	214.531	29.3517	220.668	66.8369	239.057	121.321	270.106	-28.7278	173.908	-17.0367	250.865	-31.5474	216.798	-74.3328	237.946	-92.7479	262.685	-132.171	313.057	-12.0925	214.516	30.4467	220.76	66.7	238.117	123.5	267.225	-3.70845	22.4497	-2.19926	32.3841	-4.07244	27.9863	-9.59558
		51	-29.4699	172.89	-17.6819	249.792	-32.2929	215.181	-73.9096	236.935	-91.5914	263.811	-128.789	318.176	-12.3043	212.547	31.1198	220.314	66.1297	237.996	121.76	267.594	-29.1732	172.644	-17.4588	249.552	-32.0327	215.605	-74.1487	237.573	-91.9263	262.989	-129.68	314.241	-12.5756	213.28	30.3639	220.366	65.8403	238.484	121.626	268.666	-3.76595	22.2865	-2.25375	32.2145	-4.13508	27.8323	-9.57182
		52	-30.0312	170.644	-17.6819	248.669	-32.6079	213.921	-74.2633	237.642	-91.2377	262.75	-128.604	314.482	-13.495	212.15	31.8271	220.314	64.7151	239.057	119.54	269.668	-29.5793	171.392	-17.8983	248.183	-32.4968	214.46	-73.9929	237.166	-91.174	263.287	-127.34	314.982	-13.101	212.052	30.3809	219.961	64.9366	238.781	119.85	269.996	-3.81838	22.1249	-2.31048	32.0378	-4.195	27.6845	-9.5517
		53	-29.4699	170.644	-18.8046	246.424	-32.6079	213.606	-73.9096	237.289	-89.8232	262.75	-123.258	314.1	-13.0981	211.356	30.7662	219.607	64.3615	239.057	118.933	270.425	-29.9615	170.159	-18.3362	246.761	-32.9388	213.334	-73.8289	236.621	-90.5283	263.657	-125.178	315.559	-13.6639	210.767	30.2667	219.484	64.0099	239.037	118.067	271.354	-3.86772	21.9657	-2.36701	31.8543	-4.25205	27.5392	-9.53054
		54	-30.0312	168.96	-18.2432	246.424	-33.5531	212.975	-73.556	236.228	-90.1768	264.165	-123.557	315.028	-14.6858	209.768	30.0589	218.9	62.947	239.764	115.366	274.434	-30.3547	168.916	-18.7679	245.319	-33.354	212.153	-73.6456	235.904	-89.9802	264.092	-123.195	316.207	-14.2539	209.385	29.9783	218.916	63.0883	239.296	116.202	272.765	-3.91847	21.8053	-2.42274	31.6681	-4.30565	27.3868	-9.50687
		55	-31.1538	167.277	-19.3659	242.495	-34.1832	211.085	-73.556	234.813	-89.1159	264.872	-120.114	316.626	-14.2889	208.181	30.0589	218.9	61.8861	238.703	115.666	272.503	-30.7781	167.639	-19.1877	243.916	-33.7321	210.861	-73.4384	235.027	-89.5021	264.538	-121.368	317.068	-14.8609	207.899	29.5227	218.25	62.2057	239.618	114.181	274.251	-3.97313	21.6404	-2.47693	31.487	-4.35447	27.22	-9.48013
		56	-31.1538	167.277	-19.9272	241.933	-33.8681	208.565	-73.2024	234.106	-89.1159	265.226	-120.213	318.189	-15.8765	205.402	28.6444	217.485	60.8251	239.411	112.633	276.541	-31.1992	166.325	-19.5741	242.66	-34.0726	209.501	-73.2026	234.065	-89.0312	264.902	-119.553	318.073	-15.4661	206.384	28.9608	217.499	61.3959	240.088	111.939	275.894	-4.0275	21.4708	-2.52681	31.3249	-4.39841	27.0444	-9.44969
		57	-31.7152	165.031	-19.9272	241.933	-33.8681	208.565	-73.2024	232.692	-89.4695	265.58	-119.719	319.399	-16.2734	205.006	28.2908	215.717	61.8861	240.825	108.524	276.589	-31.616	164.958	-19.9139	241.534	-34.4254	208.127	-72.9388	233.084	-88.4724	265.135	-117.51	319.095	-16.0195	204.918	28.3942	216.747	60.6303	240.701	109.554	277.683	-4.08129	21.2944	-2.57067	31.1795	-4.44395	26.867	-9.41564
		58	-32.2765	162.786	-19.9272	240.811	-34.8133	206.674	-72.4951	232.338	-88.055	265.226	-115	320.757	-16.6703	203.418	26.8762	215.363	58.7033	241.179	106.138	278.174	-32.0374	163.607	-20.2316	240.442	-34.7971	206.737	-72.667	232.119	-87.7923	265.256	-115.174	320.03	-16.5129	203.5	27.9002	216.027	59.8978	241.37	107.135	279.561	-4.13569	21.12	-2.61169	31.0385	-4.49194	26.6876	-9.38055
		59	-32.2765	161.663	-21.0499	239.688	-35.7585	205.729	-72.8487	230.57	-86.2868	264.872	-111.919	321.248	-17.0673	202.624	26.5226	216.071	59.057	242.24	105.031	282.559	-32.4799	162.347	-20.5542	239.296	-35.1701	205.324	-72.4125	231.2	-87.0002	265.304	-112.564	320.8	-16.9597	202.108	27.5218	215.319	59.1903	241.996	104.752	281.413	-4.19281	20.9573	-2.65334	30.8906	-4.54009	26.5052	-9.3477
		60	-32.8378	161.663	-19.9272	238.004	-35.7585	203.524	-71.7878	230.57	-86.2868	265.226	-109.695	320.262	-16.6703	200.639	27.9371	214.656	58.7033	242.593	103.964	284.785	-32.9844	161.164	-20.8919	238.076	-35.5071	203.908	-72.2112	230.339	-86.1766	265.336	-109.81	321.429	-17.407	200.728	27.175	214.494	58.4628	242.473	102.318	282.953	-4.25794	20.8045	-2.69692	30.7331	-4.58359	26.3224	-9.3217
		61	-32.8378	160.541	-21.6112	236.881	-35.4434	201.949	-71.4342	228.802	-85.2259	264.872	-107.104	321.149	-17.4642	199.449	28.998	215.01	57.6424	242.947	99.0888	284.704	-33.5737	159.969	-21.2716	236.803	-35.838	202.536	-72.1233	229.501	-85.3336	265.357	-106.952	321.969	-17.8958	199.392	26.6763	213.492	57.6228	242.715	99.801	284.022	-4.33402	20.6504	-2.74594	30.5688	-4.62631	26.1453	-9.31036
		62	-34.5218	158.295	-22.1726	235.198	-35.7585	201.634	-72.1415	229.862	-84.5187	264.872	-105.025	324.113	-19.0518	197.067	25.8153	211.827	56.5815	242.593	96.7369	283.584	-34.232	158.726	-21.6439	235.504	-36.2258	201.208	-72.1635	228.629	-84.4738	265.347	-103.995	322.333	-18.3836	198.144	25.9463	212.326	56.5981	242.661	97.319	284.69	-4.41899	20.4898	-2.794	30.4011	-4.67637	25.9738	-9.31555
		63	-35.0832	157.734	-21.6112	233.514	-37.0187	200.373	-72.8487	227.741	-83.8114	265.933	-100.411	322.133	-19.0518	197.464	24.0472	209.352	56.2279	242.593	94.4329	285.647	-34.8886	157.433	-22.0024	234.194	-36.6723	199.887	-72.2707	227.686	-83.5951	265.209	-101.024	322.446	-18.812	196.968	25.1355	211.125	55.3234	242.269	94.9244	285.063	-4.50376	20.323	-2.84028	30.232	-4.73401	25.8033	-9.32939
		64	-36.2058	156.05	-22.1726	233.514	-37.0187	197.853	-72.8487	226.326	-82.7505	265.226	-97.2284	323.862	-19.4487	196.273	23.6935	210.413	54.4597	242.24	93.6033	284.718	-35.4704	156.097	-22.3572	232.861	-37.1623	198.548	-72.3794	226.659	-82.6998	264.832	-98.1464	322.264	-19.141	195.821	24.4171	209.995	53.7535	241.508	92.6215	285.239	-4.57886	20.1505	-2.88608	30.0599	-4.79727	25.6305	-9.34342
		65	-35.6445	154.927	-23.8565	231.83	-37.6488	197.538	-72.8487	225.972	-81.6896	264.165	-95.6663	320.463	-19.4487	194.289	24.7544	209.705	51.9843	240.472	89.926	285.207	-35.9582	154.723	-22.711	231.427	-37.6802	197.225	-72.489	225.615	-81.8142	264.154	-95.457	321.867	-19.4031	194.648	23.8372	208.852	51.9448	240.391	90.3541	285.289	-4.64183	19.9731	-2.93175	29.8748	-4.86412	25.4596	-9.35756
		66	-36.2058	153.243	-22.1726	230.707	-38.5939	196.593	-71.7878	224.204	-81.336	263.458	-94.2725	319.741	-19.4487	193.495	21.9253	207.23	49.5088	238.703	88.052	284.514	-36.3986	153.329	-23.0705	229.861	-38.2051	195.89	-72.6737	224.587	-80.9675	263.171	-92.93	321.443	-19.662	193.452	23.3854	207.64	50.048	239.012	88.1443	285.264	-4.69868	19.7931	-2.97815	29.6727	-4.93187	25.2873	-9.38142
		67	-36.7672	152.121	-23.2952	227.339	-38.2789	194.072	-72.8487	223.143	-79.2141	261.336	-88.9546	323.007	-19.0518	192.304	23.6935	206.523	47.7407	236.935	86.962	284.529	-36.8131	151.946	-23.4891	228.243	-38.734	194.575	-72.9975	223.609	-80.2023	261.906	-90.6231	320.976	-19.979	192.217	23.0288	206.367	48.1995	237.472	85.9899	285.149	-4.75218	19.6146	-3.03219	29.4638	-5.00016	25.1176	-9.42321
		68	-37.3285	150.437	-23.8565	226.778	-39.5391	192.812	-72.8487	222.083	-79.9214	262.043	-88.3284	319.819	-21.0364	191.114	22.9862	205.815	45.9725	236.228	83.6546	286.98	-37.2087	150.612	-24.0117	226.666	-39.2665	193.333	-73.4977	222.704	-79.5468	260.378	-88.6063	320.409	-20.3879	190.919	22.7201	205.05	46.508	235.851	83.8997	284.884	-4.80326	19.4424	-3.09966	29.2602	-5.06889	24.9572	-9.48778
		69	-37.3285	148.753	-24.9792	224.532	-39.5391	191.867	-74.9705	223.143	-79.2141	257.8	-87.5144	319.692	-20.6395	189.526	22.6326	202.633	44.558	234.106	79.4389	284.463	-37.5786	149.369	-24.6044	225.197	-39.7899	192.199	-74.1266	221.809	-78.9689	258.609	-86.8705	319.753	-20.8364	189.551	22.3892	203.712	44.9916	234.165	81.9619	284.357	-4.851	19.282	-3.17617	29.0705	-5.13646	24.8109	-9.56897
		70	-38.4511	148.191	-24.9792	223.41	-40.7993	191.867	-74.6169	221.022	-77.7996	256.031	-84.0344	319.535	-21.4333	188.335	21.9253	202.279	44.2043	231.984	82.3525	282.996	-37.9178	148.237	-25.2334	223.87	-40.2931	191.129	-74.8019	220.824	-78.4553	256.751	-85.3531	319.024	-21.3082	188.123	22.0277	202.433	43.5978	232.46	80.1898	283.649	-4.89479	19.1358	-3.25736	28.8992	-5.20142	24.6727	-9.65614
		71	-37.8898	147.63	-26.1019	223.41	-40.4842	189.977	-75.6778	219.253	-78.5069	254.971	-85.3167	317.747	-21.8302	186.351	21.5717	201.572	42.4361	230.923	78.241	282.53	-38.2296	147.168	-25.8837	222.634	-40.7747	190.073	-75.496	219.773	-77.9894	254.879	-83.9741	318.244	-21.7905	186.66	21.6514	201.2	42.2533	230.76	78.4689	282.868	-4.93505	18.9978	-3.34131	28.7397	-5.26358	24.5365	-9.74574
[truncated: 198 more columns]

## Sheet: C0057
			RAW COORDINATES																				SPLINE																				mm
			HEAD		TAIL		LEFT COXAE		LEFT FT		LEFT TT		LEFT TIP		RIGHT COXAE		RIGHT FT		RIGHT TT		RIGHT TIP		HEAD		TAIL		LEFT COXAE		LEFT FT		LEFT TT		LEFT TIP		RIGHT COXAE		RIGHT FT		RIGHT TT		RIGHT TIP		HEAD		TAIL		LEFT COXAE		LEFT FT
SCALE		Frame	X	Y	X	Y	X	Y	X	Y	X	Y	X	Y	X	Y	X	Y	X	Y	X	Y	X	Y	X	Y	X	Y	X	Y	X	Y	X	Y	X	Y	X	Y	X	Y	X	Y	X	Y	X	Y	X	Y	X
X	Y	-2	471.03	-144.077	476.875	-75	490.272	-110.571	526.907	-128.185	563.248	-128.887	625.731	-130.093	460.215	-114.311	431.807	-142.867	406.236	-164.667	356.589	-206.994	470.991	-144.035	476.978	-74.9608	490.444	-110.708	527.386	-128.716	563.418	-129.24	626.224	-130.143	460.036	-114.219	431.763	-143.158	406.224	-165.191	356.969	-207.863	60.8	-18.5934	61.5728	-9.67665	63.3112	-14.2913	68.08
456.642	342.412	-1	471.03	-144.077	476.875	-75	490.272	-110.571	526.907	-128.185	563.248	-128.887	625.731	-130.093	460.215	-114.311	431.807	-142.867	406.236	-164.667	356.589	-206.994	470.991	-144.035	476.978	-74.9608	490.444	-110.708	527.386	-128.716	563.418	-129.24	626.224	-130.143	460.036	-114.219	431.763	-143.158	406.224	-165.191	356.969	-207.863	60.8	-18.5934	61.5728	-9.67665	63.3112	-14.2913	68.08
456.081	264.948	0	471.03	-144.077	476.875	-75	490.272	-110.571	526.907	-128.185	563.248	-128.887	625.731	-130.093	460.215	-114.311	431.807	-142.867	406.236	-164.667	356.589	-206.994	470.991	-144.035	476.978	-74.9608	490.444	-110.708	527.386	-128.716	563.418	-129.24	626.224	-130.143	460.036	-114.219	431.763	-143.158	406.224	-165.191	356.969	-207.863	60.8	-18.5934	61.5728	-9.67665	63.3112	-14.2913	68.08
		1	471.03	-144.077	476.875	-75	490.272	-110.571	526.907	-128.185	563.248	-128.887	625.731	-130.093	460.215	-114.311	431.807	-142.867	406.236	-164.667	356.589	-206.994	470.991	-144.035	476.978	-74.9608	490.444	-110.708	527.386	-128.716	563.418	-129.24	626.224	-130.143	460.036	-114.219	431.763	-143.158	406.224	-165.191	356.969	-207.863	60.8	-18.5934	61.5728	-9.67665	63.3112	-14.2913	68.08
DISTANCE (mm)		2	471.625	-144.276	477	-75.125	490.718	-111.017	528.169	-128.185	563.669	-128.746	627	-129.748	460.017	-114.014	431.472	-142.532	406.236	-163.685	355.719	-206.026	471.513	-144.199	477.036	-74.9371	490.783	-110.864	527.436	-128.236	563.538	-128.837	626.261	-129.872	460.15	-114	431.654	-142.319	406.284	-163.571	355.905	-205.852	60.8674	-18.6145	61.5804	-9.67359	63.3549	-14.3113	68.0864
pixel	mm	3	472.022	-144.375	477.125	-74.75	491.274	-111.017	527.608	-128.045	563.529	-128.466	626.445	-129.203	460.215	-113.915	431.472	-141.642	406.517	-162.281	355.304	-204.637	472.055	-144.381	477.058	-74.9375	491.059	-110.981	527.363	-127.571	563.608	-128.307	626.171	-129.578	460.316	-113.813	431.549	-141.393	406.346	-161.777	354.7	-203.553	60.9373	-18.6381	61.5831	-9.67364	63.3905	-14.3265	68.0771
77.4656	10	4	472.717	-144.672	477.125	-75.125	491.386	-110.905	527.328	-126.782	563.529	-127.764	626.134	-129.463	460.612	-113.617	431.695	-140.305	406.236	-160.177	353.777	-201.123	472.66	-144.618	477	-75.0184	491.208	-111.059	527.227	-126.552	563.602	-127.514	626.013	-129.185	460.554	-113.7	431.408	-140.354	406.41	-159.692	353.206	-200.78	61.0154	-18.6687	61.5757	-9.68408	63.4097	-14.3365	68.0595
1	0.12909	5	473.312	-144.871	476.875	-75.25	491.274	-111.351	526.766	-125.519	563.669	-125.94	625.603	-126.646	460.711	-113.518	431.25	-139.08	406.236	-156.949	350.821	-196.537	473.374	-144.952	476.842	-75.2101	491.22	-111.104	527.19	-125.128	563.479	-126.365	625.955	-128.542	460.853	-113.721	431.178	-139.244	406.503	-157.347	351.434	-197.624	61.1076	-18.7118	61.5553	-9.70883	63.4113	-14.3424	68.0547
		6	474.006	-145.466	476.75	-75.375	491.163	-111.128	526.907	-122.853	563.529	-125.659	625.461	-130.405	461.306	-114.014	430.804	-138.189	406.797	-155.125	350.037	-195.168	474.25	-145.432	476.597	-75.5589	491.142	-111.105	527.427	-123.35	563.191	-124.808	626.189	-127.435	461.203	-113.911	430.871	-138.098	406.607	-154.889	349.526	-194.255	61.2207	-18.7738	61.5237	-9.75386	63.4013	-14.3425	68.0853
LENGTH (mm)		7	475.296	-145.962	476.25	-76.125	490.94	-111.128	528.169	-121.731	562.827	-122.993	626.947	-125.33	461.604	-114.113	430.582	-137.076	406.797	-152.038	346.917	-189.709	475.316	-146.095	476.301	-76.1158	491.045	-111.098	527.993	-121.342	562.743	-122.758	626.795	-125.397	461.568	-114.261	430.529	-136.915	406.643	-152.416	347.545	-190.662	61.3584	-18.8594	61.4855	-9.82575	63.3887	-14.3415	68.1584
Body	10.193	8	476.487	-146.855	475.875	-76.875	490.829	-111.239	528.59	-119.486	561.985	-120.047	627.42	-121.147	461.802	-115.006	430.025	-135.851	406.517	-149.793	345.01	-186.274	476.542	-146.973	476.025	-76.8926	491.001	-111.141	528.809	-119.159	562.237	-120.316	627.671	-122.53	461.933	-114.765	430.184	-135.718	406.57	-150.035	345.599	-186.933	61.5166	-18.9726	61.4498	-9.92603	63.3831	-14.3471	68.2637
R. Femur	6.25924	9	477.975	-147.947	476	-77.875	491.274	-111.462	530.134	-116.679	561.985	-117.24	628.962	-118.421	462.299	-115.403	429.802	-134.18	406.236	-147.969	344.49	-184.099	477.873	-148.061	475.826	-77.8917	491.051	-111.306	529.795	-116.936	561.798	-117.665	628.696	-119.013	462.288	-115.402	429.869	-134.575	406.391	-147.768	343.649	-182.947	61.6884	-19.1132	61.4242	-10.055	63.3896	-14.3685	68.3909
R. Tibia	4.9928	10	479.364	-149.435	475.5	-79	491.052	-111.017	530.555	-114.294	561.564	-114.995	629.373	-116.53	462.894	-116.097	429.579	-133.512	406.096	-145.865	342.1	-179.527	479.248	-149.317	475.737	-79.1111	491.203	-111.698	530.849	-114.891	561.508	-114.92	629.718	-114.667	462.596	-116.198	429.579	-133.574	406.095	-145.571	341.534	-178.446	61.8659	-19.2752	61.4126	-10.2124	63.4091	-14.4191	68.5271
R. Tarsus	2.50778	11	480.753	-150.626	475.625	-80.75	491.386	-112.687	531.958	-113.312	561.143	-112.47	630.76	-110.462	462.795	-117.288	429.468	-132.844	405.956	-143.058	338.81	-172.228	480.633	-150.669	475.805	-80.5375	491.495	-112.425	531.92	-113.164	561.482	-112.085	630.606	-109.208	462.833	-117.188	429.284	-132.717	405.634	-143.448	339.284	-173.461	62.0446	-19.4498	61.4215	-10.3965	63.4469	-14.5129	68.6653
L. Femur	6.30927	12	482.043	-152.61	476.125	-82.125	491.943	-113.467	533.08	-111.488	561.284	-108.962	631.53	-102.671	463.092	-118.28	428.911	-132.064	404.973	-141.375	336.79	-167.893	482.032	-152.066	476.027	-82.1436	491.941	-113.461	532.909	-111.757	561.837	-109.181	631.18	-102.816	463.039	-118.387	428.961	-131.975	404.967	-141.461	337.078	-168.263	62.2253	-19.6301	61.4501	-10.6039	63.5045	-14.6467	68.7929
L. Tibia	5.0591	13	483.234	-153.503	476.5	-83.875	492.499	-114.358	533.782	-110.926	562.266	-106.296	631.345	-95.0664	463.192	-119.57	428.688	-131.062	404.131	-139.691	335.434	-163.829	483.486	-153.483	476.347	-83.943	492.52	-114.805	533.718	-110.653	562.587	-106.308	631.292	-96.0521	463.269	-119.825	428.626	-131.35	404.131	-139.593	335.003	-162.882	62.413	-19.813	61.4914	-10.8362	63.5791	-14.8201	68.8973
L. Tarsus	2.25821	14	485.317	-154.991	476.875	-85.875	493.39	-116.696	534.203	-109.944	563.809	-103.209	630.584	-88.0186	463.489	-121.654	428.243	-130.617	403.29	-137.586	333.043	-157.206	485.029	-155.017	476.731	-85.9536	493.202	-116.442	534.295	-109.8	563.58	-103.538	630.886	-89.4613	463.579	-121.495	428.298	-130.858	403.179	-137.793	333.078	-157.249	62.6121	-20.0111	61.541	-11.0957	63.6672	-15.0315	68.9719
		15	486.409	-156.38	477	-88.125	494.059	-118.367	535.185	-108.681	564.932	-101.245	631.077	-84.7083	463.886	-123.241	428.167	-130.833	402.167	-136.183	331.351	-150.754	486.655	-156.803	477.195	-88.1718	493.965	-118.275	534.61	-109.2	564.574	-100.909	629.921	-83.273	464.01	-123.338	428.005	-130.435	402.173	-136.013	331.401	-151.486	62.822	-20.2416	61.6009	-11.382	63.7657	-15.2681	69.0125
mg	17.7	16	488.294	-158.861	477.625	-90.625	494.727	-120.371	534.624	-108.962	565.212	-98.4384	628.09	-76.806	464.581	-125.325	427.833	-130.333	401.466	-134.359	330.122	-145.251	488.396	-158.942	477.785	-90.5698	494.835	-120.24	534.642	-108.874	565.38	-98.4014	628.357	-77.4124	464.568	-125.309	427.773	-129.974	401.198	-134.175	330.085	-145.718	63.0468	-20.5177	61.6771	-11.6916	63.878	-15.5218	69.0167
		17	490.179	-161.143	478.625	-93.25	495.667	-122.25	534.063	-109.243	565.914	-95.7724	625.1	-70.7423	465.374	-127.904	427.77	-129.393	400.904	-132.254	329.483	-139.861	490.237	-161.436	478.501	-93.1079	495.862	-122.319	534.502	-108.738	565.895	-96.0571	626.385	-72.0161	465.226	-127.351	427.668	-129.463	400.361	-132.238	329.231	-139.875	63.2845	-20.8397	61.7694	-12.0193	64.0105	-15.7901	68.9986
		18	492.164	-164.318	479.5	-95.875	497.167	-124.667	534.343	-108.541	566.054	-93.9483	624.135	-67.2207	465.97	-129.294	427.671	-128.797	399.922	-130.149	328.945	-133.608	492.126	-164.228	479.301	-95.7642	497.067	-124.524	534.299	-108.726	565.998	-93.9284	624.127	-67.0915	465.964	-129.439	427.783	-128.988	399.86	-130.214	328.96	-133.735	63.5283	-21.2001	61.8727	-12.3622	64.1661	-16.0747	68.9724
		19	494.247	-167.493	480	-98.375	498.083	-126.5	533.922	-108.962	565.633	-92.4048	621.541	-63.2139	466.863	-131.179	428.333	-128.583	399.782	-128.466	329.491	-128.176	493.99	-167.192	480.176	-98.5587	498.425	-126.866	534.047	-108.882	565.566	-92.006	621.397	-62.3277	466.792	-131.663	428.232	-128.634	400.035	-128.125	329.451	-127.042	63.7689	-21.5827	61.9857	-12.7229	64.3414	-16.3771	68.9399
		20	496.033	-170.469	481	-101.5	500.25	-129.667	534.063	-108.822	564.511	-90.4404	618.682	-57.738	467.756	-133.957	429	-128.417	400.203	-126.501	330.375	-121.857	495.777	-170.224	481.159	-101.534	499.904	-129.366	533.735	-109.243	564.496	-90.2917	617.948	-57.4215	467.739	-134.087	429.115	-128.432	401.259	-125.997	330.898	-119.573	63.9996	-21.9742	62.1125	-13.107	64.5323	-16.6998	68.8996
		21	497.323	-173.248	482.375	-104.625	501.417	-131.833	532.94	-110.084	563.248	-88.6163	613.599	-52.9513	468.649	-137.033	430.083	-128.333	402.307	-123.414	332.755	-111.097	497.513	-173.31	482.243	-104.697	501.419	-131.984	533.347	-109.828	562.701	-88.8881	613.606	-52.2973	468.848	-136.647	430.541	-128.39	403.788	-123.962	333.473	-111.486	64.2236	-22.3725	62.2525	-13.5152	64.728	-17.0378	68.8495
		22	499.109	-176.323	483.5	-108.25	502.833	-134.583	532.94	-110.505	561.003	-87.3535	609.185	-47.6032	470.137	-139.414	432.583	-128.833	407.359	-121.871	337.303	-102.534	499.282	-176.501	483.386	-108.028	502.946	-134.721	532.911	-110.578	560.134	-87.9387	608.374	-47.0393	470.16	-139.245	432.576	-128.507	407.541	-122.253	337.187	-103.505	64.4521	-22.7845	62.4	-13.9453	64.9251	-17.3911	68.7932
		23	501.093	-179.895	484.375	-111.375	504.417	-137.583	532.239	-111.909	556.513	-87.0729	601.328	-41.2216	471.824	-141.795	435.417	-129.333	413.112	-120.748	343.17	-93.8286	501.134	-179.843	484.569	-111.507	504.472	-137.553	532.38	-111.468	556.925	-87.5003	602.338	-41.9314	471.67	-141.871	435.17	-128.786	412.025	-120.986	341.869	-96.3376	64.6912	-23.2158	62.5528	-14.3944	65.122	-17.7566	68.7247
		24	502.978	-183.169	485.875	-115	506.25	-140.833	532.098	-112.61	553.145	-87.7745	596.003	-37.203	473.312	-144.772	438.167	-129	417.602	-120.468	346.869	-91.1213	503.063	-183.336	485.8	-115.148	505.954	-140.416	531.686	-112.493	553.406	-87.4563	595.715	-37.3829	473.363	-144.574	438.268	-129.333	416.685	-120.144	347.402	-90.3061	64.9402	-23.6667	62.7117	-14.8645	65.3134	-18.1262	68.6351
		25	504.963	-186.841	487.125	-119	507.25	-143.25	530.976	-113.452	549.357	-87.9148	588.719	-33.2289	474.899	-146.955	441.333	-129.833	421.53	-120.047	352.721	-86.041	505.041	-186.975	487.05	-118.943	507.35	-143.27	530.752	-113.751	549.854	-87.5771	588.553	-33.6628	475.258	-147.404	441.862	-130.378	421.256	-119.653	353.947	-85.1506	65.1955	-24.1366	62.8731	-15.3543	65.4936	-18.4946	68.5145
		26	507.245	-191.008	488.5	-122.875	508.833	-146.167	529.853	-115.557	546.691	-88.0551	581.465	-31.2581	477.082	-150.427	445.667	-131.75	425.459	-119.626	360.909	-80.8964	507.011	-190.713	488.303	-122.843	508.674	-146.172	529.599	-115.377	546.432	-87.7009	580.917	-30.934	477.348	-150.429	445.907	-132.077	425.76	-119.521	361.545	-80.7053	65.4498	-24.619	63.0348	-15.8578	65.6645	-18.8692	68.3656
		27	509.13	-194.778	489.375	-126.75	510.083	-148.667	528.31	-117.381	542.902	-88.476	572.856	-29.1446	479.96	-153.801	450.083	-134.25	430.09	-119.906	369.77	-76.6328	508.911	-194.477	489.574	-126.807	509.943	-149.196	528.339	-117.452	543.19	-87.7811	572.956	-29.2688	479.527	-153.622	450.217	-134.421	430.314	-119.872	369.89	-77.065	65.695	-25.105	63.1989	-16.3694	65.8283	-19.2597	68.203
		28	510.519	-197.953	490.875	-131	511	-152.083	527.047	-119.486	539.956	-87.7745	564.314	-27.937	481.944	-156.777	455.083	-137.333	435.001	-120.468	379.391	-73.7666	510.735	-198.273	490.916	-130.8	511.215	-152.385	527.151	-120.081	540.193	-87.9108	564.95	-28.7813	481.634	-156.944	454.515	-137.288	434.972	-120.877	378.456	-74.394	65.9306	-25.595	63.3721	-16.8849	65.9925	-19.6714	68.0497
		29	512.603	-202.22	492.25	-134.5	512.25	-156.5	526.065	-122.993	537.711	-88.0551	557.322	-29.2224	483.432	-160.151	458.667	-140.917	439.07	-122.572	386.506	-73.3683	512.533	-202.173	492.345	-134.788	512.575	-155.644	526.219	-123.325	537.44	-88.3541	557.15	-29.5278	483.606	-160.385	458.509	-140.5	439.722	-122.697	386.706	-72.7333	66.1627	-26.0985	63.5565	-17.3997	66.168	-20.092	67.9293
		30	514.289	-206.089	493.875	-139.125	514.167	-158.917	525.363	-126.782	535.466	-89.0373	550.92	-31.2996	485.417	-164.219	462.583	-144	444.682	-125.238	394.35	-72.4863	514.32	-206.197	493.851	-138.764	514.048	-158.825	525.689	-127.087	534.877	-89.3667	549.667	-31.3477	485.468	-163.894	462.043	-143.903	444.505	-125.396	394.296	-71.992	66.3933	-26.6179	63.751	-17.9129	66.3581	-20.5026	67.8609
		31	516.075	-210.256	495.375	-142.625	515.75	-161.833	525.503	-131.693	532.519	-90.5807	542.131	-34.2581	487.5	-167.791	465.167	-147.583	449.313	-127.904	403.156	-70.6115	516.112	-210.35	495.404	-142.685	515.58	-161.966	525.651	-131.146	532.529	-91.1094	542.686	-33.9593	487.221	-167.375	465.055	-147.446	449.128	-128.975	400.896	-72.2169	66.6246	-27.1539	63.9514	-18.4192	66.5559	-20.9081	67.856
		32	517.861	-214.324	497.125	-146.625	517	-165.417	525.924	-135.201	530.414	-93.2467	536.443	-36.9187	488.989	-170.767	467.5	-151	453.522	-133.096	406.674	-73.0887	517.92	-214.609	496.968	-146.574	517.136	-165.167	526.101	-135.22	530.574	-93.6207	536.654	-37.0701	488.857	-170.818	467.625	-151.133	453.411	-133.334	406.302	-73.5121	66.8581	-27.7038	64.1534	-18.9211	66.7568	-21.3213	67.9141
		33	519.746	-219.087	498.5	-150.375	518.833	-168	526.907	-139.971	528.45	-96.6143	530.423	-41.1907	490.179	-174.141	469.667	-154.75	457.17	-138.849	408.591	-77.0339	519.744	-218.91	498.515	-150.46	518.717	-168.515	526.974	-139.135	529.21	-96.7782	531.953	-40.444	490.439	-174.321	469.881	-154.996	457.232	-138.103	410.854	-75.6194	67.0935	-28.259	64.353	-19.4228	66.961	-21.7536	68.0268
		34	521.632	-223.75	499.875	-154.25	520.25	-171.75	528.31	-142.918	528.029	-100.964	527.649	-44.0769	491.965	-177.613	472.083	-159.167	461.52	-143.9	415.842	-77.884	521.566	-223.126	500.046	-154.378	520.313	-172.12	528.151	-142.792	528.553	-100.335	528.798	-43.8702	492.06	-177.986	471.917	-159.031	460.503	-142.843	414.973	-78.1728	67.3287	-28.8032	64.5507	-19.9286	67.167	-22.2189	68.1788
		35	523.418	-227.024	501.875	-158.375	521.917	-176.083	529.573	-145.724	528.31	-104.332	526.558	-46.927	493.553	-181.681	473.833	-163.083	463.625	-147.548	419.551	-80.4791	523.371	-227.191	501.562	-158.339	521.926	-175.965	529.499	-146.286	528.511	-104.021	526.976	-47.3113	493.756	-181.849	473.779	-163.177	463.184	-147.327	418.636	-81.0891	67.5617	-29.328	64.7464	-20.4399	67.3751	-22.7152	68.3527
		36	525.104	-230.993	502.875	-162.375	523.583	-180.25	531.116	-149.793	529.853	-107.699	528.152	-50.9946	495.735	-186.245	475.25	-167.583	464.326	-151.056	420.748	-85.124	525.159	-231.182	503.04	-162.32	523.549	-179.927	530.918	-149.76	528.812	-107.718	525.9	-50.7978	495.516	-185.841	475.544	-167.385	465.492	-151.628	421.943	-84.2647	67.7925	-29.8432	64.9372	-20.9539	67.5847	-23.2267	68.5359
[truncated: 198 more columns]

## Sheet: C0061
			RAW COORDINATES																				SPLINE																				mm
			HEAD		TAIL		LEFT COXAE		LEFT FT		LEFT TT		LEFT TIP		RIGHT COXAE		RIGHT FT		RIGHT TT		RIGHT TIP		HEAD		TAIL		LEFT COXAE		LEFT FT		LEFT TT		LEFT TIP		RIGHT COXAE		RIGHT FT		RIGHT TT		RIGHT TIP		HEAD		TAIL		LEFT COXAE		LEFT FT
SCALE		Frame	X	Y	X	Y	X	Y	X	Y	X	Y	X	Y	X	Y	X	Y	X	Y	X	Y	X	Y	X	Y	X	Y	X	Y	X	Y	X	Y	X	Y	X	Y	X	Y	X	Y	X	Y	X	Y	X	Y	X
X	Y	-2	-303.75	269.917	-273.043	197.463	-298.583	229.083	-348.325	239.838	-389	246.25	-445.962	255.23	-277.239	239.876	-253.187	282.01	-242.634	299.807	-202.775	367.031	-303.696	269.843	-273.119	197.415	-298.424	229.152	-348.511	240.241	-389.127	246.499	-446.201	255.296	-277.085	239.982	-253.261	282.165	-242.538	299.784	-201.871	366.608	-38.0997	33.8526	-34.2636	24.7663	-37.4383	28.7479	-43.7218
490.884	192.536	-1	-303.75	269.917	-273.043	197.463	-298.583	229.083	-348.325	239.838	-389	246.25	-445.962	255.23	-277.239	239.876	-253.187	282.01	-242.634	299.807	-202.775	367.031	-303.696	269.843	-273.119	197.415	-298.424	229.152	-348.511	240.241	-389.127	246.499	-446.201	255.296	-277.085	239.982	-253.261	282.165	-242.538	299.784	-201.871	366.608	-38.0997	33.8526	-34.2636	24.7663	-37.4383	28.7479	-43.7218
490.322	112.827	0	-303.75	269.917	-273.043	197.463	-298.583	229.083	-348.325	239.838	-389	246.25	-445.962	255.23	-277.239	239.876	-253.187	282.01	-242.634	299.807	-202.775	367.031	-303.696	269.843	-273.119	197.415	-298.424	229.152	-348.511	240.241	-389.127	246.499	-446.201	255.296	-277.085	239.982	-253.261	282.165	-242.538	299.784	-201.871	366.608	-38.0997	33.8526	-34.2636	24.7663	-37.4383	28.7479	-43.7218
		1	-303.75	269.917	-273.043	197.463	-298.583	229.083	-348.325	239.838	-389	246.25	-445.962	255.23	-277.239	239.876	-253.187	282.01	-242.634	299.807	-202.775	367.031	-303.696	269.843	-273.119	197.415	-298.424	229.152	-348.511	240.241	-389.127	246.499	-446.201	255.296	-277.085	239.982	-253.261	282.165	-242.538	299.784	-201.871	366.608	-38.0997	33.8526	-34.2636	24.7663	-37.4383	28.7479	-43.7218
DISTANCE (mm)		2	-303.75	270.083	-273.324	197.463	-298.299	229.079	-348.914	239.956	-389.25	246	-446.666	254.604	-277.127	239.876	-252.875	282	-241.995	299.394	-200.459	365.8	-303.809	269.955	-273.233	197.439	-298.403	229.155	-348.765	239.951	-389.294	245.89	-446.56	254.282	-277.285	239.964	-252.85	281.941	-241.832	299.324	-199.946	365.411	-38.1139	33.8667	-34.278	24.7693	-37.4356	28.7483	-43.7537
pixel	mm	3	-304	269.917	-273.324	197.463	-298.486	229.36	-349.032	239.838	-389.625	245.25	-447.008	252.901	-277.35	239.988	-252.625	281.875	-240.904	298.798	-196.347	363.132	-303.926	270.076	-273.343	197.468	-298.395	229.151	-349.004	239.623	-389.448	245.261	-446.899	253.267	-277.496	239.934	-252.432	281.704	-241.138	298.868	-198.114	364.26	-38.1286	33.8819	-34.2917	24.773	-37.4346	28.7477	-43.7837
79.711	10	4	-304	270.167	-273.511	197.463	-298.486	229.173	-349.268	239.484	-389.625	244.75	-447.28	252.273	-277.907	240.21	-252	281.5	-240.309	298.302	-195.545	362.635	-304.049	270.22	-273.445	197.509	-298.407	229.129	-349.223	239.224	-389.577	244.594	-447.204	252.263	-277.717	239.875	-252.006	281.445	-240.474	298.422	-196.475	363.21	-38.144	33.9	-34.3046	24.7781	-37.4362	28.745	-43.8111
1	0.125453	5	-304.167	270.5	-273.604	197.65	-298.299	229.547	-349.268	239.013	-389.625	243.75	-447.437	250.536	-277.907	239.988	-251.481	281.182	-239.813	297.905	-194.921	362.243	-304.182	270.393	-273.544	197.565	-298.455	229.095	-349.421	238.74	-389.681	243.882	-447.474	251.268	-277.943	239.785	-251.582	281.172	-239.841	297.986	-194.993	362.228	-38.1606	33.9217	-34.317	24.7852	-37.4422	28.7407	-43.8361
		6	-304.333	270.583	-273.604	197.65	-298.579	228.986	-349.652	238.153	-389.75	243.125	-447.744	250.317	-278.241	239.654	-251.039	280.74	-239.416	297.608	-194.953	362.13	-304.326	270.597	-273.643	197.643	-298.554	229.063	-349.599	238.174	-389.762	243.117	-447.712	250.259	-278.172	239.673	-251.171	280.895	-239.23	297.553	-193.58	361.254	-38.1787	33.9472	-34.3293	24.7949	-37.4546	28.7367	-43.8583
LENGTH (mm)		7	-304.5	270.75	-273.698	197.743	-298.486	228.986	-349.839	237.217	-389.75	242.25	-447.906	249.584	-278.241	239.208	-250.774	280.563	-238.424	297.012	-191.426	359.606	-304.484	270.839	-273.752	197.749	-298.715	229.08	-349.748	237.559	-389.82	242.292	-447.92	249.168	-278.406	239.577	-250.777	280.624	-238.63	297.11	-192.132	360.22	-38.1985	33.9776	-34.343	24.8083	-37.4748	28.7388	-43.877
Body	10.5419	8	-304.667	271.083	-273.885	197.837	-298.766	228.612	-349.839	236.937	-389.75	241.375	-448.077	247.861	-278.575	239.319	-250.421	280.298	-238.027	296.616	-190.635	359.01	-304.656	271.123	-273.878	197.895	-298.939	229.186	-349.864	236.913	-389.854	241.394	-448.102	247.94	-278.647	239.521	-250.392	280.359	-238.032	296.64	-190.604	359.09	-38.22	34.0133	-34.3589	24.8266	-37.5029	28.7521	-43.8915
R. Femur	6.81521	9	-304.75	271.417	-273.978	198.024	-299.234	228.986	-350.026	236.469	-389.875	240.5	-448.368	246.417	-278.909	239.542	-250.067	280.21	-237.531	296.417	-189.592	358.393	-304.844	271.453	-274.026	198.09	-299.218	229.413	-349.946	236.248	-389.855	240.41	-448.261	246.522	-278.889	239.515	-250.007	280.093	-237.426	296.125	-188.958	357.828	-38.2436	34.0547	-34.3775	24.851	-37.5379	28.7806	-43.9018
R. Tibia	5.54962	10	-305.083	271.833	-274.259	198.305	-299.608	229.547	-350	235.417	-389.875	239.75	-448.265	246.095	-279.132	239.654	-249.714	279.679	-236.836	295.723	-187.841	356.762	-305.05	271.824	-274.198	198.338	-299.524	229.746	-349.997	235.565	-389.807	239.321	-448.4	244.87	-279.119	239.541	-249.618	279.818	-236.794	295.548	-187.134	356.373	-38.2695	34.1012	-34.399	24.8821	-37.5763	28.8224	-43.9082
R. Tarsus	2.06018	11	-305.25	272.167	-274.353	198.585	-300.076	230.576	-350	234.667	-389.75	238.25	-448.444	243.541	-279.577	239.765	-249.006	279.502	-236.042	294.83	-185.174	354.97	-305.272	272.228	-274.394	198.637	-299.833	230.129	-350.023	234.879	-389.697	238.133	-448.523	242.978	-279.322	239.588	-249.223	279.524	-236.126	294.912	-185.144	354.718	-38.2973	34.1518	-34.4237	24.9197	-37.615	28.8704	-43.9115
L. Femur	6.40673	12	-305.5	272.667	-274.539	198.885	-300.263	230.763	-349.917	234.333	-389.5	236.875	-448.557	240.667	-279.355	239.654	-248.83	279.237	-235.645	294.333	-183.811	353.686	-305.505	272.658	-274.618	198.983	-300.126	230.499	-350.031	234.199	-389.514	236.865	-448.633	240.873	-279.49	239.65	-248.827	279.202	-235.416	294.232	-183.028	352.878	-38.3266	34.2058	-34.4517	24.9631	-37.6518	28.9168	-43.9126
L. Tibia	5.47622	13	-305.75	273.167	-274.837	199.381	-300.357	230.95	-350	233.875	-389.125	235	-448.802	236.716	-279.577	239.765	-248.476	278.972	-234.653	293.341	-179.951	350.206	-305.747	273.102	-274.87	199.367	-300.405	230.819	-350.028	233.516	-389.253	235.56	-448.72	238.669	-279.629	239.737	-248.419	278.834	-234.657	293.525	-180.869	350.912	-38.357	34.2615	-34.4833	25.0112	-37.6868	28.9569	-43.9121
L. Tarsus	2.51746	14	-306	273.667	-275.135	199.877	-300.637	231.231	-350.125	232.5	-388.875	234.125	-448.882	236.641	-279.8	239.765	-248.122	278.707	-233.803	292.938	-178.014	348.383	-305.993	273.55	-275.143	199.769	-300.684	231.075	-350.007	232.838	-388.906	234.252	-448.767	236.434	-279.737	239.861	-247.989	278.406	-233.855	292.808	-178.784	348.922	-38.3878	34.3177	-34.5175	25.0617	-37.7218	28.9891	-43.9095
		15	-306.417	274.333	-275.5	200.25	-300.918	231.418	-350	231.75	-388.75	233	-448.792	234.937	-279.911	240.099	-247.68	278.088	-233.264	292.151	-176.925	347.107	-306.239	273.998	-275.428	200.177	-300.973	231.275	-349.966	232.182	-388.458	232.939	-448.771	234.118	-279.813	240.034	-247.534	277.926	-233.015	292.093	-176.814	346.957	-38.4186	34.3739	-34.5533	25.1128	-37.758	29.0142	-43.9044
mg	18.1	16	-306.417	274.167	-275.833	200.75	-301.292	231.418	-349.875	231.5	-388.125	232	-448.71	232.792	-279.911	240.099	-247.062	277.293	-232.123	291.259	-174.859	344.796	-306.483	274.453	-275.716	200.58	-301.279	231.432	-349.906	231.554	-387.893	231.605	-448.728	231.664	-279.856	240.265	-247.057	277.414	-232.148	291.395	-174.971	345.046	-38.4492	34.4311	-34.5895	25.1634	-37.7964	29.0339	-43.8969
		17	-306.583	274.75	-276	201	-301.386	231.511	-349.875	231.5	-387.125	230.25	-448.663	228.185	-279.911	240.433	-246.531	276.674	-231.151	290.64	-173.355	343.121	-306.735	274.945	-276.005	200.98	-301.606	231.575	-349.833	230.917	-387.218	230.24	-448.642	229.092	-279.873	240.563	-246.576	276.911	-231.276	290.733	-173.238	343.201	-38.4809	34.4928	-34.6257	25.2136	-37.8375	29.0519	-43.8876
		18	-307	275.333	-276.25	201.25	-301.917	231.583	-349.75	230.375	-386.5	228.875	-448.511	226.344	-279.911	240.99	-246.001	276.32	-230.267	290.021	-171.458	341.231	-306.999	275.481	-276.299	201.39	-301.951	231.732	-349.752	230.249	-386.453	228.858	-448.519	226.47	-279.879	240.922	-246.11	276.44	-230.421	290.119	-171.602	341.42	-38.514	34.56	-34.6626	25.2651	-37.8807	29.0716	-43.8775
		19	-307.333	276.083	-276.417	201.75	-302.414	231.979	-349.5	229.5	-385.625	227.125	-448.13	223.016	-279.8	241.213	-245.647	275.878	-229.56	289.403	-169.987	339.483	-307.271	276.056	-276.605	201.825	-302.302	231.926	-349.67	229.544	-385.623	227.485	-448.359	223.858	-279.893	241.332	-245.674	276.018	-229.597	289.554	-170.052	339.694	-38.5481	34.6322	-34.7009	25.3196	-37.9247	29.0958	-43.8672
		20	-307.667	276.833	-277	202.25	-302.833	232	-349.75	228.75	-384.75	226.125	-448.316	221.358	-279.8	241.769	-245.205	275.613	-228.764	289.049	-168.668	338.16	-307.544	276.651	-276.921	202.29	-302.638	232.169	-349.591	228.825	-384.75	226.137	-448.163	221.257	-279.932	241.78	-245.276	275.641	-228.805	289.029	-168.567	337.995	-38.5824	34.7067	-34.7407	25.3779	-37.9669	29.1263	-43.8573
		21	-307.75	277.417	-277.333	202.833	-302.917	232.417	-349.5	228.25	-383.875	224.875	-447.87	218.592	-280.023	242.438	-244.94	275.348	-228.057	288.695	-167.401	336.648	-307.82	277.249	-277.239	202.781	-302.954	232.469	-349.515	228.111	-383.859	224.812	-447.922	218.624	-280.006	242.248	-244.916	275.293	-228.038	288.527	-167.126	336.283	-38.617	34.7818	-34.7806	25.4396	-38.0066	29.164	-43.8478
		22	-308.083	277.917	-277.583	203.333	-303.25	232.833	-349.375	227.375	-382.875	223.75	-447.645	216.741	-280.134	242.994	-244.587	275.083	-227.438	288.165	-166.001	335.035	-308.103	277.847	-277.549	203.295	-303.252	232.83	-349.444	227.418	-382.974	223.5	-447.625	215.907	-280.12	242.716	-244.594	274.961	-227.29	288.029	-165.714	334.529	-38.6525	34.8568	-34.8195	25.504	-38.0439	29.2092	-43.8388
		23	-308.417	278.333	-277.833	203.75	-303.5	233.167	-349.375	226.5	-382	222.125	-447.341	213.363	-280.134	243.329	-244.321	274.729	-226.643	287.635	-164.487	333.008	-308.398	278.456	-277.852	203.828	-303.536	233.245	-349.381	226.767	-382.118	222.2	-447.268	213.066	-280.275	243.184	-244.308	274.631	-226.555	287.531	-164.339	332.737	-38.6895	34.9332	-34.8574	25.5709	-38.0796	29.2613	-43.831
		24	-308.667	278.917	-278.167	204.417	-303.833	233.917	-349.375	226	-381.125	220.875	-446.955	210.249	-280.357	243.551	-244.056	274.287	-225.759	286.751	-162.364	329.932	-308.708	279.095	-278.15	204.381	-303.812	233.706	-349.329	226.178	-381.309	220.926	-446.843	210.117	-280.47	243.671	-244.056	274.303	-225.84	287.042	-163.039	330.96	-38.7284	35.0133	-34.8948	25.6403	-38.1142	29.3192	-43.8244
		25	-309	279.833	-278.5	205.083	-304.083	234.167	-349.25	225.5	-380.75	219.5	-446.348	207.005	-280.58	243.885	-243.88	273.934	-224.875	286.397	-161.225	328.139	-309.034	279.766	-278.446	204.951	-304.081	234.208	-349.285	225.644	-380.548	219.69	-446.354	207.112	-280.695	244.207	-243.838	273.981	-225.157	286.57	-161.839	329.233	-38.7693	35.0976	-34.932	25.7118	-38.1479	29.3822	-43.8189
		26	-309.25	280.417	-278.667	205.583	-304.25	234.667	-349.25	225.5	-379.875	218.25	-445.435	202.73	-281.136	244.665	-243.614	273.668	-224.521	286.044	-160.67	327.429	-309.377	280.47	-278.745	205.536	-304.345	234.75	-349.25	225.148	-379.832	218.498	-445.807	204.11	-280.931	244.815	-243.652	273.672	-224.511	286.113	-160.738	327.554	-38.8123	35.1858	-34.9695	25.7852	-38.181	29.4501	-43.8146
		27	-309.75	281.25	-279.083	206.083	-304.667	235.167	-349.125	224.875	-379	217.5	-445.088	201.186	-281.359	245.667	-243.438	273.403	-224.079	285.778	-160.157	326.642	-309.731	281.199	-279.053	206.146	-304.605	235.335	-349.226	224.662	-379.168	217.336	-445.208	201.146	-281.148	245.491	-243.502	273.377	-223.886	285.644	-159.667	325.803	-38.8567	35.2774	-35.0081	25.8617	-38.2137	29.5236	-43.8116
		28	-310.167	281.833	-279.25	206.75	-305.083	236	-349.25	224.25	-378.625	216.5	-444.823	199.035	-281.359	246.113	-243.349	273.05	-223.284	285.248	-158.889	324.396	-310.083	281.951	-279.373	206.792	-304.86	235.955	-349.209	224.187	-378.558	216.181	-444.536	198.169	-281.337	246.224	-243.386	273.101	-223.27	285.139	-158.567	323.878	-38.9009	35.3716	-35.0483	25.9427	-38.2457	29.6013	-43.8094
		29	-310.5	282.75	-279.667	207.333	-305.083	236.75	-349.25	223.375	-378.125	215.25	-444.398	196.602	-281.693	246.669	-243.349	272.873	-222.753	284.806	-157.824	322.426	-310.421	282.718	-279.708	207.485	-305.112	236.595	-349.192	223.736	-378.006	215.014	-443.762	195.122	-281.5	247.002	-243.299	272.844	-222.659	284.575	-157.395	321.702	-38.9433	35.4679	-35.0903	26.0296	-38.2772	29.6816	-43.8072
		30	-310.833	283.667	-280.083	208.167	-305.25	237.333	-349.25	223.25	-377.375	213.625	-442.769	191.246	-281.582	248.006	-243.172	272.608	-221.958	284.01	-156.109	319.404	-310.737	283.49	-280.051	208.227	-305.377	237.237	-349.168	223.328	-377.514	213.848	-442.883	192.03	-281.649	247.809	-243.232	272.607	-222.055	283.946	-156.155	319.274	-38.983	35.5647	-35.1334	26.1227	-38.3106	29.7622	-43.8042
		31	-311.083	284.25	-280.5	209.167	-305.583	237.833	-349.25	222.75	-376.75	212.375	-441.731	187.86	-281.693	248.897	-243.172	272.342	-221.427	283.303	-154.908	316.833	-311.036	284.261	-280.394	209.009	-305.671	237.881	-349.138	222.956	-377.088	212.703	-441.936	188.991	-281.806	248.613	-243.178	272.392	-221.466	283.263	-154.878	316.648	-39.0205	35.6615	-35.1763	26.2209	-38.3474	29.843	-43.8005
		32	-311.25	285	-280.75	209.917	-306.083	238.667	-349	222.625	-376.75	211.75	-441.029	186.56	-282.027	249.453	-243.172	272.077	-220.985	282.596	-153.858	314.421	-311.325	285.031	-280.728	209.822	-306.003	238.53	-349.109	222.605	-376.728	211.597	-440.961	186.089	-281.993	249.386	-243.128	272.2	-220.894	282.543	-153.598	313.893	-39.0567	35.7581	-35.2182	26.3229	-38.389	29.9243	-43.7968
		33	-311.583	285.833	-281.083	210.667	-306.333	239.167	-348.875	222.625	-376.25	210.375	-439.097	182.252	-282.027	250.122	-243.083	272.083	-220.278	281.535	-151.772	309.929	-311.618	285.807	-281.054	210.664	-306.372	239.188	-349.093	222.242	-376.407	210.516	-439.981	183.316	-282.221	250.124	-243.071	272.027	-220.339	281.81	-152.358	311.103	-39.0934	35.8554	-35.2591	26.4285	-38.4354	30.0069	-43.7949
		34	-311.833	286.583	-281.417	211.417	-306.75	239.917	-349.083	222.083	-376.125	209.5	-438.699	180.382	-282.584	251.124	-243.083	272	-219.925	281.182	-151.198	308.43	-311.923	286.591	-281.376	211.542	-306.783	239.869	-349.098	221.837	-376.093	209.452	-439.011	180.662	-282.5	250.833	-242.999	271.861	-219.804	281.084	-151.204	308.39	-39.1317	35.9537	-35.2995	26.5387	-38.4869	30.0923	-43.7955
		35	-312.25	287.417	-281.667	212.417	-307	240.333	-349.083	221.5	-375.875	208.5	-438.011	178.35	-282.807	251.569	-243	271.75	-219.218	280.21	-149.873	304.876	-312.243	287.386	-281.702	212.462	-307.238	240.586	-349.112	221.395	-375.746	208.393	-438	178.05	-282.831	251.528	-242.909	271.697	-219.295	280.375	-150.152	305.801	-39.1718	36.0535	-35.3404	26.654	-38.544	30.1823	-43.7973
		36	-312.75	288.333	-281.917	213.417	-307.667	241.25	-349.167	220.917	-375.375	207.5	-437.151	175.875	-283.252	252.126	-242.75	271.5	-218.864	279.768	-149.344	303.83	-312.577	288.199	-282.04	213.422	-307.732	241.352	-349.121	220.935	-375.327	207.326	-436.872	175.383	-283.213	252.234	-242.801	271.535	-218.817	279.688	-149.205	303.353	-39.2137	36.1555	-35.3828	26.7745	-38.606	30.2783	-43.7984
		37	-312.833	289	-282.333	214.417	-308.333	242.167	-348.833	220.25	-374.875	206.375	-436.067	173.772	-283.586	252.683	-242.583	271.333	-218.334	278.972	-148.307	301.031	-312.924	289.036	-282.396	214.418	-308.246	242.162	-349.111	220.491	-374.803	206.249	-435.546	172.572	-283.65	252.99	-242.684	271.385	-218.379	279.024	-148.35	301.015	-39.2574	36.2605	-35.4275	26.8994	-38.6704	30.38	-43.7971
		38	-313.167	289.75	-282.75	215.417	-308.917	243	-349.083	220.25	-374.375	205.625	-434.651	170.77	-284.032	253.797	-242.583	271.333	-217.892	278.353	-147.508	298.364	-313.293	289.915	-282.767	215.44	-308.753	243.004	-349.058	220.089	-374.154	205.177	-433.975	169.612	-284.144	253.812	-242.561	271.251	-217.987	278.382	-147.576	298.77	-39.3036	36.3708	-35.4741	27.0276	-38.734	30.4857	-43.7905
		39	-313.667	290.75	-283.25	216.5	-309.417	243.917	-349.25	219.75	-373.625	204.125	-432.464	166.408	-284.589	254.465	-242.583	271.167	-217.538	277.558	-146.809	295.606	-313.689	290.849	-283.144	216.48	-309.232	243.862	-348.934	219.751	-373.362	204.138	-432.144	166.556	-284.693	254.711	-242.432	271.137	-217.646	277.761	-146.874	296.604	-39.3533	36.488	-35.5214	27.1582	-38.7942	30.5933	-43.7748
		40	-314.083	291.75	-283.583	217.667	-309.667	244.833	-348.917	219.167	-372.375	202.625	-429.696	162.205	-285.145	255.467	-242.417	270.917	-217.361	277.204	-146.546	294.975	-314.105	291.841	-283.517	217.53	-309.679	244.72	-348.702	219.499	-372.431	203.198	-430.107	163.579	-285.287	255.679	-242.295	271.051	-217.351	277.154	-146.222	294.459	-39.4055	36.6124	-35.5681	27.2898	-38.8502	30.701	-43.7458
		41	-314.583	292.917	-283.917	218.667	-310.083	245.75	-348.75	218.917	-371.5	202	-428.068	159.937	-285.925	257.026	-242.25	270.833	-217.184	276.762	-146.061	293.585	-314.533	292.88	-283.884	218.584	-310.101	245.572	-348.359	219.349	-371.383	202.4	-427.93	160.806	-285.9	256.688	-242.166	271	-217.09	276.542	-145.612	292.23	-39.4592	36.7428	-35.6141	27.4221	-38.9032	30.8078	-43.7028
		42	-315	294.083	-284.361	219.632	-310.333	246.417	-348	219.167	-370.25	201.75	-425.833	158.241	-286.704	257.806	-242.083	271	-216.919	275.967	-145.111	290.139	-314.963	293.953	-284.248	219.645	-310.51	246.415	-347.917	219.298	-370.243	201.773	-425.673	158.309	-286.505	257.704	-242.064	270.985	-216.852	275.908	-145.045	289.829	-39.5132	36.8774	-35.6598	27.5551	-38.9544	30.9135	-43.6473
		43	-315.417	295	-284.548	220.661	-310.917	247.25	-347.25	219.75	-368.875	201.5	-422.788	156.001	-287.261	258.697	-242	271.083	-216.654	275.083	-144.365	286.489	-315.389	295.048	-284.618	220.723	-310.91	247.264	-347.42	219.305	-369.042	201.294	-423.392	156.052	-287.069	258.709	-242.021	270.991	-216.631	275.25	-144.566	287.281	-39.5665	37.0147	-35.7062	27.6904	-39.0047	31.0201	-43.5849
		44	-315.833	296.167	-284.829	221.783	-311.417	248	-346.667	219.667	-367.625	200.875	-420.26	153.682	-287.707	260.033	-241.833	271	-216.389	274.641	-143.987	285	-315.805	296.158	-285.01	221.83	-311.297	248.137	-346.922	219.319	-367.811	200.939	-421.155	153.991	-287.579	259.694	-242.071	271.004	-216.429	274.574	-144.227	284.63	-39.6188	37.154	-35.7554	27.8293	-39.0532	31.1296	-43.5225
		45	-316.25	297.333	-285.333	222.833	-311.667	249	-346.167	219.333	-366.5	200.5	-418.683	152.167	-288.041	260.59	-242	271.083	-216.301	274.199	-143.875	282.978	-316.214	297.28	-285.43	222.97	-311.667	249.045	-346.46	219.327	-366.566	200.697	-418.957	152.065	-288.041	260.665	-242.237	271.016	-216.248	273.874	-144.059	281.89	-39.67	37.2948	-35.8082	27.9723	-39.0996	31.2435	-43.4645
		46	-316.583	298.333	-285.917	224.167	-312	249.917	-345.917	219.583	-365.5	200.625	-416.934	150.833	-288.375	261.703	-242.167	271.083	-216.212	273.226	-143.659	279.217	-316.616	298.409	-285.879	224.144	-312.02	249.993	-346.054	219.335	-365.311	200.551	-416.758	150.204	-288.465	261.636	-242.533	271.022	-216.092	273.151	-144.081	279.092	-39.7205	37.4364	-35.8645	28.1195	-39.1439	31.3625	-43.4136
		47	-317.083	299.5	-286.417	225.333	-312.5	251	-345.583	219.333	-364.25	200.625	-415.398	149.363	-288.82	262.372	-242.75	271	-215.947	272.166	-144	275.295	-317.015	299.542	-286.342	225.342	-312.359	250.98	-345.695	219.364	-364.043	200.474	-414.463	148.339	-288.869	262.632	-242.945	271.02	-215.965	272.432	-144.287	276.356	-39.7705	37.5785	-35.9226	28.2698	-39.1865	31.4862	-43.3686
		48	-317.333	300.75	-286.75	226.583	-312.583	251.833	-345.5	219.167	-362.75	200.375	-412.342	146.351	-289.154	263.374	-243.583	271	-215.859	271.37	-144.749	272.319	-317.417	300.673	-286.811	226.554	-312.692	251.998	-345.36	219.449	-362.777	200.445	-412.024	146.482	-289.258	263.668	-243.424	271.015	-215.883	271.741	-144.63	273.783	-39.821	37.7204	-35.9813	28.4219	-39.2283	31.614	-43.3266
		49	-317.833	301.917	-287.333	227.833	-313	253.083	-345.25	219.333	-361.25	200.625	-409.494	144.215	-289.6	264.933	-244.167	271.083	-215.859	271.282	-145.326	271.776	-317.827	301.791	-287.277	227.77	-313.028	253.038	-345.022	219.624	-361.538	200.447	-409.429	144.679	-289.636	264.749	-243.916	271.008	-215.86	271.091	-145.053	271.424	-39.8725	37.8607	-36.0398	28.5745	-39.2703	31.7444	-43.2841
		50	-318.25	303.083	-287.833	228.917	-313.333	254.583	-344.75	220.083	-360.125	200.625	-406.03	142.528	-290.157	266.047	-244.583	271.083	-215.859	270.928	-145.741	270.549	-318.248	302.893	-287.734	228.985	-313.372	254.077	-344.659	219.898	-360.353	200.465	-406.723	143.003	-289.997	265.853	-244.369	271.004	-215.908	270.462	-145.497	269.196	-39.9253	37.9989	-36.0971	28.7269	-39.3136	31.8748	-43.2386
		51	-318.667	304	-288.167	230.167	-313.667	255.167	-344.25	220.167	-359.5	200.625	-405.06	142.243	-290.379	266.826	-245.25	271.083	-216.035	269.602	-146.533	266.079	-318.682	303.99	-288.179	230.192	-313.728	255.115	-344.274	220.264	-359.221	200.501	-403.93	141.475	-290.336	266.975	-244.759	271.012	-216.04	269.861	-145.933	267.075	-39.9796	38.1366	-36.1529	28.8783	-39.3582	32.0049	-43.1902
		52	-319.083	305	-288.667	231.417	-314	255.917	-343.833	220.75	-357.875	200.5	-400.157	139.524	-290.602	268.163	-245	271.083	-216.212	268.895	-146.441	263.592	-319.129	305.102	-288.613	231.386	-314.095	256.163	-343.871	220.715	-358.134	200.567	-401.072	140.105	-290.655	268.116	-245.08	271.047	-216.263	269.304	-146.351	265.063	-40.0358	38.276	-36.2075	29.0281	-39.4042	32.1365	-43.1397
		53	-319.583	306	-289.083	232.667	-314.667	257.167	-343.588	221.074	-357	200.5	-397.567	138.271	-290.936	268.831	-245.167	271.083	-216.477	268.807	-146.633	263.264	-319.59	306.253	-289.043	232.557	-314.464	257.254	-343.459	221.247	-357.09	200.684	-398.203	138.923	-290.96	269.273	-245.364	271.131	-216.584	268.805	-146.792	263.129	-40.0936	38.4204	-36.2614	29.1751	-39.4505	32.2734	-43.0881
		54	-320.083	307.333	-289.333	233.833	-314.833	258.25	-343.146	221.781	-356.25	200.75	-395.417	137.889	-291.493	270.835	-245.5	271.167	-216.919	268.541	-147.071	262.126	-320.062	307.459	-289.477	233.698	-314.824	258.404	-343.044	221.851	-356.073	200.873	-395.329	137.929	-291.256	270.438	-245.641	271.289	-217.006	268.343	-147.305	261.125	-40.1528	38.5717	-36.3159	29.3182	-39.4957	32.4176	-43.0359
		55	-320.583	308.75	-289.917	235	-315.25	259.417	-342.616	222.311	-355.125	201	-392.651	137.068	-291.382	271.615	-245.917	271.25	-217.538	268.011	-147.711	260.042	-320.54	308.712	-289.923	234.815	-315.177	259.61	-342.642	222.507	-355.065	201.132	-392.406	137.073	-291.554	271.587	-245.922	271.541	-217.519	267.901	-147.926	258.928	-40.2128	38.7289	-36.3718	29.4583	-39.5399	32.569	-42.9855
		56	-320.917	310.083	-290.333	235.917	-315.417	260.917	-342.174	223.284	-354	201.375	-389.125	136.303	-291.827	272.951	-246	271.5	-218.068	267.746	-148.038	258.334	-321.023	309.999	-290.385	235.921	-315.526	260.865	-342.274	223.186	-354.051	201.456	-389.388	136.292	-291.865	272.703	-246.211	271.896	-218.112	267.466	-148.675	256.46	-40.2733	38.8904	-36.4297	29.597	-39.5837	32.7263	-42.9394
		57	-321.583	311.417	-290.917	236.917	-315.917	262.417	-341.732	224.256	-353.125	201.875	-386.573	136.169	-292.161	273.842	-246.667	272.333	-218.776	266.862	-149.672	253.306	-321.508	311.304	-290.859	237.047	-315.879	262.138	-341.966	223.843	-353.027	201.823	-386.239	135.517	-292.202	273.79	-246.503	272.334	-218.77	267.047	-149.542	253.782	-40.3343	39.0541	-36.4892	29.7383	-39.628	32.8861	-42.9007
		58	-322.083	312.667	-291.417	238	-316.167	263.25	-341.378	224.698	-352.125	202.375	-384.254	135.638	-292.495	274.176	-246.917	272.917	-219.483	266.508	-150.664	250.433	-321.993	312.622	-291.341	238.22	-316.241	263.416	-341.724	224.455	-351.988	202.205	-382.925	134.71	-292.569	274.866	-246.787	272.809	-219.475	266.664	-150.479	251.064	-40.3951	39.2194	-36.5497	29.8855	-39.6734	33.0464	-42.8703
		59	-322.5	313.833	-291.833	239.333	-316.667	264.833	-341.555	225.405	-351.25	202.75	-380.442	134.533	-292.941	276.403	-247.25	273.75	-220.367	266.332	-151.968	247.457	-322.474	313.953	-291.831	239.463	-316.612	264.687	-341.541	225.012	-350.934	202.581	-379.437	133.857	-292.966	275.944	-247.053	273.269	-220.21	266.333	-151.435	248.485	-40.4554	39.3865	-36.6112	30.0414	-39.72	33.2059	-42.8475
		60	-322.833	315.167	-292.167	240.583	-317.083	266	-341.643	225.67	-350	203	-375.83	132.927	-293.609	277.183	-247.417	274	-220.985	265.89	-152.922	245.005	-322.959	315.305	-292.335	240.775	-316.991	265.943	-341.382	225.542	-349.882	202.94	-375.876	133.045	-293.387	277.002	-247.31	273.673	-220.962	266.054	-152.381	246.156	-40.5162	39.556	-36.6743	30.2061	-39.7676	33.3635	-42.8274
		61	-323.417	316.667	-292.833	242.167	-317.25	267.083	-341.378	225.847	-348.5	203.125	-370.94	131.528	-293.832	277.962	-247.417	274.083	-221.869	265.801	-153.391	243.602	-323.452	316.669	-292.852	242.141	-317.385	267.185	-341.214	226.105	-348.873	203.291	-372.424	132.405	-293.831	278.044	-247.585	274.028	-221.726	265.819	-153.344	244.067	-40.5781	39.7272	-36.7393	30.3773	-39.8169	33.5192	-42.8064
		62	-324	318.083	-293.417	243.583	-317.833	268.5	-341.113	226.377	-347.5	203.5	-367.692	131.175	-294.166	279.187	-247.833	274.333	-222.488	265.713	-154.255	242.505	-323.956	318.035	-293.381	243.536	-317.797	268.411	-341.018	226.764	-347.951	203.641	-369.252	132.063	-294.303	279.083	-247.906	274.354	-222.505	265.616	-154.373	242.165	-40.6413	39.8986	-36.8055	30.5523	-39.8686	33.6731	-42.7818
		63	-324.417	319.5	-293.917	245	-318.25	269.833	-340.848	227.615	-346.875	204.125	-365.413	131.873	-294.834	279.856	-248	274.5	-223.284	265.536	-155.079	240.8	-324.464	319.386	-293.908	244.931	-318.23	269.623	-340.794	227.567	-347.135	203.988	-366.414	132.073	-294.814	280.137	-248.295	274.688	-223.309	265.427	-155.54	240.319	-40.7051	40.068	-36.8717	30.7274	-39.923	33.825	-42.7538
		64	-325	320.75	-294.5	246.5	-318.583	270.5	-340.75	228.25	-346.5	204.5	-364.009	132.182	-295.168	281.526	-248.583	274.917	-224.079	265.271	-156.609	238.712	-324.974	320.709	-294.426	246.303	-318.686	270.826	-340.55	228.535	-346.404	204.32	-363.83	132.417	-295.367	281.221	-248.762	275.064	-224.152	265.242	-156.903	238.43	-40.7691	40.234	-36.9367	30.8995	-39.9801	33.976	-42.7232
		65	-325.5	322.083	-294.917	247.75	-319.167	272.167	-340.083	229.417	-345.875	204.875	-362.786	133.216	-296.059	282.194	-249.25	275.333	-224.875	265.006	-158.239	236.773	-325.482	322.004	-294.931	247.64	-319.164	272.03	-340.306	229.675	-345.72	204.638	-361.338	133.045	-295.957	282.345	-249.29	275.497	-225.04	265.061	-158.477	236.443	-40.8328	40.3964	-37.0001	31.0672	-40.0402	34.127	-42.6925
		66	-325.917	323.25	-295.5	249	-319.583	273.083	-339.917	230.833	-345.375	204.875	-360.256	134.105	-296.504	283.419	-250.083	276	-225.847	265.006	-160.069	235.167	-325.984	323.27	-295.42	248.938	-319.663	273.241	-340.085	230.982	-345.043	204.953	-358.791	133.898	-296.575	283.524	-249.855	275.992	-225.977	264.885	-160.258	234.323	-40.8958	40.5553	-37.0614	31.2301	-40.1028	34.2789	-42.6648
		67	-326.583	324.417	-295.917	250.167	-320.083	274.25	-339.833	232.75	-344.375	205.375	-356.011	135.24	-297.173	284.644	-250.583	276.5	-226.819	264.741	-161.993	232.662	-326.476	324.518	-295.892	250.209	-320.176	274.459	-339.901	232.423	-344.354	205.297	-356.159	134.92	-297.21	284.77	-250.424	276.54	-226.952	264.713	-162.215	232.076	-40.9574	40.7119	-37.1206	31.3895	-40.1671	34.4318	-42.6417
		68	-327.083	325.833	-296.333	251.333	-320.833	276.083	-339.75	234	-343.625	205.625	-353.124	136.066	-297.952	285.869	-250.833	277	-228.145	264.475	-164.3	229.23	-326.954	325.752	-296.354	251.467	-320.687	275.67	-339.751	233.961	-343.655	205.701	-353.52	136.085	-297.848	286.084	-250.984	277.129	-227.937	264.555	-164.295	229.788	-41.0175	40.8666	-37.1786	31.5474	-40.2312	34.5837	-42.6229
		69	-327.333	327.083	-296.75	252.667	-321.333	277	-339.667	235.5	-342.875	206.125	-350.398	137.241	-298.62	287.54	-251.667	278	-228.941	264.299	-167.018	226.965	-327.42	326.974	-296.813	252.726	-321.181	276.86	-339.628	235.571	-342.955	206.199	-350.965	137.38	-298.473	287.455	-251.53	277.743	-228.904	264.418	-166.435	227.562	-41.0759	41.0199	-37.2362	31.7053	-40.2932	34.733	-42.6075
		70	-327.833	328.167	-297.333	254	-321.667	277.917	-339.75	236.667	-342.25	206.625	-347.947	138.164	-299.066	288.431	-252.25	278.667	-230.002	264.299	-169.217	225.043	-327.884	328.19	-297.275	253.987	-321.649	278.034	-339.52	237.244	-342.259	206.821	-348.548	138.801	-299.078	288.861	-252.051	278.36	-229.831	264.309	-168.569	225.485	-41.1341	41.1725	-37.2941	31.8635	-40.3519	34.8803	-42.5939
		71	-328.25	329.333	-297.75	255.25	-322.083	279.417	-339.583	238.583	-341.5	207.375	-345.642	139.926	-299.734	290.992	-252.583	279.083	-230.797	264.21	-170.949	223.353	-328.352	329.413	-297.743	255.246	-322.095	279.209	-339.429	238.94	-341.568	207.582	-346.259	140.31	-299.666	290.262	-252.553	278.984	-230.71	264.219	-170.696	223.578	-41.1928	41.326	-37.3528	32.0215	-40.4078	35.0276	-42.5824
		72	-328.833	330.583	-298.083	256.417	-322.417	280.333	-339.333	240.833	-341.25	208.125	-345.116	142.159	-300.068	291.549	-252.667	279.417	-231.416	264.21	-172.284	221.897	-328.825	330.657	-298.221	256.5	-322.527	280.403	-339.363	240.602	-340.878	208.491	-344.056	141.847	-300.243	291.622	-253.048	279.631	-231.537	264.143	-172.843	221.836	-41.2522	41.482	-37.4128	32.1787	-40.462	35.1774	-42.5741
		73	-329.333	331.833	-298.667	257.833	-322.917	281.417	-339.167	242.917	-340.25	209.5	-342.369	144.125	-300.848	293.219	-253.5	280.333	-232.3	264.299	-174.666	220.707	-329.297	331.928	-298.714	257.744	-322.949	281.642	-339.35	242.127	-340.189	209.527	-341.851	143.304	-300.816	292.933	-253.551	280.335	-232.321	264.073	-175.069	220.225	-41.3114	41.6415	-37.4746	32.3348	-40.515	35.3329	-42.5726
		74	-329.75	333.167	-299.25	259.083	-323.5	282.667	-339.333	243.917	-339.25	210.875	-339.084	145.074	-301.182	293.887	-254.25	281.083	-233.095	263.945	-177.448	218.862	-329.76	333.225	-299.216	258.969	-323.36	282.952	-339.416	243.437	-339.525	210.645	-339.626	144.602	-301.385	294.2	-254.052	281.113	-233.061	264.008	-177.393	218.72	-41.3695	41.8041	-37.5377	32.4885	-40.5665	35.4972	-42.5809
		75	-330.333	334.5	-299.75	260.167	-323.833	284.25	-339.5	244.917	-338.875	211.875	-337.631	146.091	-302.184	295.669	-254.5	281.833	-233.891	263.945	-179.854	217.042	-330.21	334.538	-299.72	260.175	-323.757	284.329	-339.57	244.524	-338.905	211.802	-337.388	145.736	-301.939	295.432	-254.54	281.979	-233.757	263.962	-179.802	217.332	-41.4259	41.9689	-37.6009	32.6398	-40.6163	35.6701	-42.6002
		76	-330.667	335.917	-300.25	261.25	-324.167	285.833	-339.667	245.583	-338.375	213	-335.751	146.818	-302.629	296.56	-255	282.75	-234.51	263.857	-182.333	215.746	-330.644	335.854	-300.217	261.366	-324.143	285.76	-339.816	245.41	-338.348	212.959	-335.148	146.73	-302.469	296.641	-255.006	282.946	-234.409	263.948	-182.28	216.079	-41.4803	42.1339	-37.6632	32.7892	-40.6648	35.8496	-42.631
		77	-331	337.25	-300.75	262.583	-324.5	287.5	-340.167	245.917	-337.625	214.25	-332.259	147.39	-302.741	297.451	-255.583	283.75	-235.04	263.857	-184.577	214.989	-331.066	337.154	-300.702	262.548	-324.533	287.214	-340.146	246.167	-337.856	214.093	-332.918	147.655	-302.974	297.842	-255.448	284.012	-235.029	263.978	-184.817	214.962	-41.5333	42.2971	-37.7241	32.9375	-40.7138	36.0319	-42.6724
		78	-331.5	338.583	-301.167	263.75	-324.75	288.583	-340.5	246.417	-337.375	215.375	-330.599	148.07	-303.743	299.456	-256	285.417	-235.482	263.945	-187.712	213.955	-331.482	338.43	-301.176	263.72	-324.941	288.675	-340.546	246.868	-337.427	215.19	-330.729	148.577	-303.46	299.031	-255.865	285.152	-235.638	264.051	-187.399	213.956	-41.5855	42.4571	-37.7835	33.0846	-40.7649	36.2153	-42.7226
		79	-331.917	339.75	-301.667	264.917	-325.25	290.083	-340.917	247.25	-337	216.375	-328.478	149.193	-303.743	300.124	-256.083	286.417	-236.101	264.21	-189.967	212.942	-331.898	339.675	-301.638	264.883	-325.378	290.137	-340.997	247.577	-337.054	216.239	-328.606	149.548	-303.935	300.203	-256.262	286.336	-236.257	264.16	-190.01	213.033	-41.6377	42.6134	-37.8414	33.2304	-40.8198	36.3986	-42.7792
		80	-332.167	340.75	-302.083	266	-325.917	291.833	-341.75	248.167	-336.875	217.125	-326.415	150.52	-304.3	301.349	-256.583	287.583	-236.808	264.387	-192.458	212.364	-332.318	340.902	-302.092	266.038	-325.839	291.594	-341.477	248.316	-336.715	217.255	-326.536	150.575	-304.411	301.363	-256.656	287.54	-236.893	264.288	-192.646	212.161	-41.6904	42.7672	-37.8984	33.3753	-40.8776	36.5815	-42.8394
		81	-332.833	342.083	-302.5	267.167	-326.417	292.917	-342	249.333	-336.5	218.125	-324.845	151.99	-304.968	302.462	-257.083	288.833	-237.692	264.475	-195.52	211.503	-332.743	342.121	-302.542	267.19	-326.312	293.046	-341.967	249.076	-336.39	218.256	-324.494	151.634	-304.892	302.518	-257.051	288.753	-237.541	264.424	-195.297	211.312	-41.7437	42.9202	-37.9549	33.5199	-40.9369	36.7636	-42.9009
[truncated: 198 more columns]

## Sheet: C0062
			RAW COORDINATES																				SPLINE																				mm
			HEAD		TAIL		LEFT COXAE		LEFT FT		LEFT TT		LEFT TIP		RIGHT COXAE		RIGHT FT		RIGHT TT		RIGHT TIP		HEAD		TAIL		LEFT COXAE		LEFT FT		LEFT TT		LEFT TIP		RIGHT COXAE		RIGHT FT		RIGHT TT		RIGHT TIP		HEAD		TAIL		LEFT COXAE		LEFT FT
SCALE		Frame	X	Y	X	Y	X	Y	X	Y	X	Y	X	Y	X	Y	X	Y	X	Y	X	Y	X	Y	X	Y	X	Y	X	Y	X	Y	X	Y	X	Y	X	Y	X	Y	X	Y	X	Y	X	Y	X	Y	X
X	Y	-2	128.825	34.2412	209.096	46.0291	168.688	29.1731	148.049	-18.4564	128.997	-60.9261	107.592	-108.641	166.703	49.4157	128.6	90.6946	85.3363	136.736	60.9142	162.727	128.846	33.4506	209.964	46.3259	168.864	29.266	147.952	-18.6536	128.922	-61.1019	107.393	-108.839	166.845	49.3424	128.625	90.6236	83.5944	136.729	59.5361	161.381	16.1641	4.19649	26.3407	5.81173	21.1845	3.67151	18.5611
490.884	192.536	-1	128.825	34.2412	209.096	46.0291	168.688	29.1731	148.049	-18.4564	128.997	-60.9261	107.592	-108.641	166.703	49.4157	128.6	90.6946	85.3363	136.736	60.9142	162.727	128.846	33.4506	209.964	46.3259	168.864	29.266	147.952	-18.6536	128.922	-61.1019	107.393	-108.839	166.845	49.3424	128.625	90.6236	83.5944	136.729	59.5361	161.381	16.1641	4.19649	26.3407	5.81173	21.1845	3.67151	18.5611
490.322	112.827	0	128.825	34.2412	209.096	46.0291	168.688	29.1731	148.049	-18.4564	128.997	-60.9261	107.592	-108.641	166.703	49.4157	128.6	90.6946	85.3363	136.736	60.9142	162.727	128.846	33.4506	209.964	46.3259	168.864	29.266	147.952	-18.6536	128.922	-61.1019	107.393	-108.839	166.845	49.3424	128.625	90.6236	83.5944	136.729	59.5361	161.381	16.1641	4.19649	26.3407	5.81173	21.1845	3.67151	18.5611
		1	128.825	34.2412	209.096	46.0291	168.688	29.1731	148.049	-18.4564	128.997	-60.9261	107.592	-108.641	166.703	49.4157	128.6	90.6946	85.3363	136.736	60.9142	162.727	128.846	33.4506	209.964	46.3259	168.864	29.266	147.952	-18.6536	128.922	-61.1019	107.393	-108.839	166.845	49.3424	128.625	90.6236	83.5944	136.729	59.5361	161.381	16.1641	4.19649	26.3407	5.81173	21.1845	3.67151	18.5611
DISTANCE (mm)		2	127.703	32.5572	210.78	46.5904	168.291	29.57	148.049	-20.0441	130.584	-61.323	109.535	-111.076	166.307	49.4157	128.997	91.0915	82.9548	137.927	59.7038	161.579	128.498	33.0498	209.475	46.4948	168.419	29.2631	148.206	-19.2311	130.104	-60.8723	108.788	-109.893	166.263	49.2738	128.967	91.0052	84.0661	137.895	60.5678	162.397	16.1205	4.14621	26.2793	5.83293	21.1288	3.67115	18.5929
pixel	mm	3	128.825	32.5572	208.534	46.5904	168.291	29.1731	148.842	-19.2503	130.584	-61.72	109.804	-110.058	165.91	49.0187	128.6	91.8853	83.3517	139.118	60.2226	163.262	128.129	32.7492	208.893	46.6241	167.947	29.2543	148.469	-19.7999	131.308	-60.6285	110.23	-110.946	165.663	49.2189	129.307	91.3989	84.7577	139.062	61.7739	163.585	16.0742	4.10849	26.2063	5.84915	21.0695	3.67004	18.6259
79.711	10	4	127.141	31.9958	208.534	47.1518	167.894	28.7762	148.445	-19.6472	132.172	-58.5447	110.297	-110.832	165.116	48.6218	129.791	91.0915	85.7332	139.515	63.2715	164.203	127.658	32.5978	208.241	46.6822	167.415	29.2606	148.746	-20.415	132.584	-60.4244	111.822	-112.09	165.034	49.2	129.627	91.8362	85.7515	140.238	63.2109	165.03	16.0151	4.0895	26.1246	5.85644	21.0028	3.67084	18.6607
1	0.125453	5	128.264	32.5572	206.85	46.5904	166.703	29.57	148.842	-20.8379	134.553	-60.5292	115.362	-113.838	164.719	50.2095	131.378	91.4884	88.1147	141.499	66.7105	166.242	127.028	32.6017	207.554	46.6482	166.834	29.2889	149.068	-21.0831	133.909	-60.3819	113.597	-113.324	164.391	49.2004	129.833	92.3883	86.9594	141.416	64.7509	166.755	15.936	4.08998	26.0383	5.85217	20.9298	3.67438	18.7011
		6	126.58	32.5572	207.412	46.5904	165.91	29.57	149.636	-22.4256	134.95	-60.9261	114.409	-114.778	163.131	48.6218	128.997	94.2668	88.1147	142.293	64.9268	169.533	126.225	32.7022	206.837	46.5416	166.257	29.3153	149.43	-21.7099	135.245	-60.4802	115.541	-114.541	163.782	49.2079	129.928	93.0103	88.3304	142.529	66.3583	168.663	15.8354	4.10259	25.9484	5.83879	20.8575	3.6777	18.7465
LENGTH (mm)		7	124.896	33.6798	205.728	46.5904	165.116	29.1731	149.636	-22.8225	136.538	-60.9261	117.504	-116.297	163.131	49.4157	129.791	93.473	90.4961	144.278	69.3183	171.659	125.279	32.8219	206.097	46.3912	165.74	29.3213	149.82	-22.1915	136.559	-60.6703	117.642	-115.628	163.253	49.2179	129.949	93.6382	89.8496	143.492	68.0346	170.641	15.7167	4.11762	25.8555	5.81993	20.7926	3.67845	18.7954
Body	10.5419	8	123.773	32.5572	205.728	46.0291	165.513	29.1731	150.43	-22.0287	138.126	-59.7354	119.767	-115.996	162.337	49.4157	130.584	93.8699	89.7023	144.675	68.6176	170.877	124.318	32.8873	205.337	46.232	165.28	29.3261	150.225	-22.4909	137.833	-60.9606	119.886	-116.542	162.806	49.2389	129.942	94.2658	91.5692	144.218	69.7994	172.651	15.5961	4.12582	25.7601	5.79995	20.7349	3.67906	18.8462
R. Femur	6.81521	9	122.651	33.1185	205.166	45.4678	165.116	29.57	150.827	-22.8225	139.316	-61.72	122.78	-117.603	163.131	48.6218	129.791	95.0606	94.4653	144.278	72.1554	175.361	123.428	32.8924	204.55	46.121	164.811	29.3325	150.625	-22.637	139.034	-61.3602	122.197	-117.289	162.395	49.2856	129.914	94.8987	93.5332	144.705	71.7089	174.726	15.4844	4.12646	25.6615	5.78602	20.6761	3.67985	18.8964
R. Tibia	5.54962	10	123.773	33.1185	202.921	46.5904	164.719	29.57	150.827	-23.6163	140.11	-62.1169	124.321	-118.84	161.544	49.4157	129.394	95.4576	94.8622	144.278	72.3151	176.155	122.582	32.8348	203.799	46.0597	164.295	29.3398	151.027	-22.6416	140.177	-61.7911	124.519	-117.858	161.975	49.3509	129.922	95.5122	95.6822	144.986	73.7643	176.799	15.3783	4.11923	25.5672	5.77834	20.6114	3.68078	18.9468
R. Tarsus	2.06018	11	121.528	32.5572	202.36	46.0291	163.131	28.7762	150.827	-22.0287	141.301	-62.5138	128.188	-118.244	161.94	50.2095	129.394	96.6483	98.4344	145.865	76.7644	180.315	121.745	32.7187	203.153	46.0344	163.719	29.3582	151.447	-22.5354	141.291	-62.1671	126.811	-118.259	161.502	49.4115	130.023	96.0756	97.9281	145.071	75.9231	178.764	15.2733	4.10466	25.4862	5.77516	20.5391	3.68308	18.9995
L. Femur	6.40673	12	120.405	32.5572	202.921	46.0291	163.925	29.57	152.018	-22.0287	142.095	-62.5138	128.488	-118.03	161.147	49.0187	130.981	96.6483	100.816	145.469	79.0252	180.735	120.938	32.5856	202.621	46.04	163.115	29.4204	151.878	-22.4404	142.416	-62.4634	129.079	-118.615	160.952	49.4264	130.199	96.5774	100.175	144.898	78.0525	180.534	15.1721	4.08797	25.4195	5.77587	20.4634	3.69088	19.0535
L. Tibia	5.47622	13	120.405	32.5572	201.798	45.4678	161.94	29.57	153.208	-22.4256	143.286	-62.5138	129.459	-118.373	160.353	49.4157	130.187	96.6483	102.404	143.881	80.0719	181.845	120.186	32.4656	202.117	46.0898	162.487	29.5108	152.252	-22.4424	143.583	-62.6932	131.438	-119.053	160.327	49.4285	130.383	97.0588	102.362	144.479	80.0839	182.151	15.0778	4.07292	25.3562	5.78212	20.3846	3.70223	19.1005
L. Tarsus	2.51746	14	119.283	31.9958	202.36	46.5904	161.147	29.57	152.415	-21.6318	145.27	-62.9107	135.558	-119.027	159.162	49.4157	130.981	97.4421	103.991	143.881	81.3133	182.9	119.465	32.3883	201.548	46.1773	161.895	29.6162	152.525	-22.5853	144.78	-62.8782	133.916	-119.635	159.663	49.431	130.555	97.5726	104.505	143.884	82.0666	183.713	14.9872	4.06322	25.2849	5.79309	20.3103	3.71544	19.1347
		15	118.721	32.5572	201.237	46.5904	161.94	29.57	152.811	-22.4256	146.064	-63.3076	136.715	-119.949	159.162	49.4157	130.584	97.839	107.96	143.087	86.3803	186.247	118.745	32.3665	200.851	46.2626	161.319	29.73	152.737	-22.8422	145.99	-63.0262	136.442	-120.307	158.975	49.4348	130.723	98.1264	106.609	143.141	84.0265	185.244	14.897	4.06049	25.1974	5.80379	20.238	3.72972	19.1613
mg	18.1	16	118.16	31.9958	200.114	46.0291	161.147	29.9669	152.415	-24.0132	146.858	-62.5138	138.295	-121.843	158.368	49.0187	130.981	98.6329	107.563	141.499	83.5937	185.376	118	32.406	199.991	46.3139	160.716	29.8407	152.949	-23.1416	147.209	-63.1486	138.963	-120.969	158.261	49.4402	130.904	98.7069	108.692	142.262	86.0148	186.753	14.8035	4.06543	25.0895	5.81022	20.1623	3.74361	19.188
		17	117.599	32.5572	198.992	46.5904	159.956	30.3638	153.208	-24.4101	148.445	-63.7045	141.314	-122.535	157.971	49.8126	130.584	99.4267	110.739	141.896	88.7391	188.975	117.189	32.4959	199.024	46.3495	160.062	29.9224	153.211	-23.3341	148.461	-63.2705	141.543	-121.469	157.51	49.4345	131.128	99.2638	110.841	141.237	88.2026	188.262	14.7017	4.07671	24.9682	5.81469	20.0803	3.75386	19.2209
		18	116.476	32.5572	198.43	46.5904	158.765	29.1731	153.208	-22.8225	150.033	-63.3076	145.48	-121.363	156.384	49.8126	131.775	100.221	112.326	139.912	88.2825	188.981	116.296	32.5971	198.016	46.3678	159.402	29.9761	153.527	-23.3819	149.731	-63.3745	144.149	-121.765	156.744	49.3692	131.409	99.7334	113.078	139.996	90.6304	189.719	14.5898	4.08941	24.8418	5.81699	19.9975	3.7606	19.2605
		19	114.792	33.6798	196.185	46.0291	159.162	30.3638	154.399	-23.6163	150.43	-63.3076	144.564	-121.969	155.193	49.4157	131.378	99.8236	115.502	139.912	94.9827	191.722	115.362	32.6643	197.056	46.3975	158.739	29.9965	153.868	-23.3357	151.014	-63.4641	146.8	-121.911	156.009	49.2504	131.736	100.096	115.343	138.512	93.1854	191.06	14.4726	4.09784	24.7213	5.82072	19.9143	3.76316	19.3032
		20	114.231	31.9958	195.062	46.0291	157.971	30.3638	153.605	-24.0132	152.415	-63.3076	150.611	-122.811	155.59	49.0187	132.569	100.617	117.486	138.324	95.8594	192.391	114.427	32.6756	196.227	46.4721	158.063	29.9695	154.206	-23.2564	152.301	-63.5483	149.499	-121.971	155.33	49.1112	132.087	100.346	117.548	136.801	95.7257	192.227	14.3553	4.09926	24.6174	5.83007	19.8296	3.75977	19.3456
		21	114.231	32.5572	195.624	47.1518	157.178	29.57	154.796	-21.6318	154.399	-63.7045	153.864	-120.471	155.193	48.6218	132.569	99.8236	120.662	133.561	99.6719	193.032	113.486	32.6866	195.531	46.5936	157.361	29.8741	154.531	-23.2151	153.549	-63.6105	152.153	-122.011	154.638	49.027	132.444	100.49	119.576	135.041	98.1353	193.184	14.2372	4.10064	24.53	5.84532	19.7414	3.7478	19.3864
		22	111.985	32.5572	195.624	46.0291	157.178	29.9669	155.59	-22.8225	154.399	-64.4983	152.767	-121.625	154.399	48.2249	132.172	101.411	121.455	132.37	99.8393	194.817	112.521	32.7118	194.827	46.7319	156.616	29.7335	154.787	-23.3339	154.734	-63.6022	154.763	-122.151	153.88	49.0625	132.829	100.526	121.334	133.565	100.417	193.916	14.1161	4.1038	24.4417	5.86267	19.648	3.73017	19.4186
		23	111.424	33.1185	194.501	47.1518	155.59	29.57	154.796	-24.4101	155.987	-64.1014	157.76	-123.209	152.811	49.4157	133.363	99.8236	123.043	131.577	102.812	193.827	111.548	32.7274	194.006	46.8545	155.83	29.5669	154.984	-23.5716	155.892	-63.5341	157.395	-122.351	153.095	49.1889	133.246	100.448	122.842	132.53	102.689	194.461	13.9941	4.10575	24.3387	5.87805	19.5494	3.70926	19.4432
		24	110.863	32.5572	193.378	47.1518	154.796	29.1731	155.193	-23.6163	156.781	-63.3076	159.144	-122.381	151.224	49.8126	133.76	100.617	123.837	131.577	103.591	194.744	110.578	32.7105	193.002	46.9246	155.012	29.3935	155.157	-23.8507	157.07	-63.4646	160.094	-122.537	152.349	49.3444	133.684	100.252	124.152	131.988	105.082	194.864	13.8724	4.10364	24.2127	5.88684	19.4467	3.68751	19.4649
		25	109.179	33.1185	192.817	47.1518	154.399	29.1731	154.796	-24.4101	158.368	-62.9107	163.928	-122.831	151.621	49.8126	134.553	100.221	125.028	132.37	106.473	194.991	109.583	32.6618	191.854	46.8943	154.179	29.2431	155.378	-24.1356	158.296	-63.5577	162.789	-122.679	151.683	49.4465	134.102	99.9416	125.336	131.822	107.672	195.168	13.7475	4.09753	24.0687	5.88304	19.3423	3.66865	19.4926
		26	109.179	32.5572	189.449	47.1518	153.605	29.1731	155.193	-24.0132	159.559	-62.5138	166.331	-122.227	151.621	49.4157	134.157	99.4267	126.615	131.974	111.845	195.719	108.554	32.5889	190.662	46.7572	153.324	29.1206	155.695	-24.4	159.578	-63.9521	165.376	-122.762	151.021	49.4791	134.484	99.5352	126.434	131.875	110.371	195.374	13.6185	4.08838	23.9192	5.86584	19.235	3.65328	19.5324
		27	108.056	31.9958	188.326	46.5904	152.018	28.7762	156.384	-24.8071	160.75	-64.1014	167.299	-123.046	150.43	49.4157	134.553	99.4267	127.409	132.37	113.605	196.025	107.462	32.5435	189.612	46.5454	152.463	29.0227	156.088	-24.6266	160.927	-64.6941	167.865	-122.765	150.268	49.4707	134.856	99.0812	127.451	132.031	112.976	195.469	13.4815	4.08269	23.7874	5.83927	19.127	3.641	19.5818
		28	105.811	31.9958	188.888	45.4678	151.224	29.1731	156.781	-24.8071	161.94	-66.086	169.041	-122.887	149.636	49.0187	135.347	97.839	128.6	132.37	116.392	194.848	106.362	32.5508	188.714	46.337	151.619	28.9343	156.495	-24.7798	162.338	-65.6414	170.345	-122.64	149.393	49.4488	135.205	98.6467	128.403	132.22	115.429	195.501	13.3434	4.0836	23.6748	5.81312	19.0211	3.6299	19.6328
		29	104.127	33.1185	188.326	46.0291	151.224	28.7762	157.178	-25.204	164.322	-66.8798	173.878	-122.626	148.445	49.8126	135.347	98.2359	129.394	132.767	118.553	195.642	105.333	32.6026	187.913	46.2007	150.795	28.8377	156.858	-24.8218	163.795	-66.6076	172.878	-122.34	148.392	49.4276	135.501	98.2883	129.309	132.388	117.755	195.53	13.2143	4.0901	23.5743	5.79602	18.9178	3.61778	19.6784
		30	105.249	33.1185	187.765	46.5904	150.43	29.1731	156.781	-24.8071	164.322	-68.0706	173.754	-122.182	147.652	49.4157	136.538	98.2359	129.791	131.974	117.153	195.16	104.41	32.6163	187.094	46.1218	149.939	28.7215	157.173	-24.7376	165.244	-67.4175	175.39	-121.865	147.292	49.3863	135.707	98.0076	130.211	132.525	120.128	195.595	13.0986	4.09181	23.4716	5.78613	18.8103	3.6032	19.7179
		31	103.565	32.5572	186.081	46.0291	148.445	28.3793	157.971	-24.4101	167.497	-68.4675	178.86	-121.021	145.667	49.4157	135.347	97.4421	130.584	132.767	122.14	195.399	103.517	32.5619	186.219	46.06	149.052	28.5887	157.455	-24.5503	166.642	-67.9483	177.83	-121.258	146.147	49.3304	135.8	97.7877	131.154	132.644	122.748	195.716	12.9865	4.08499	23.3618	5.77837	18.699	3.58654	19.7532
		32	102.443	31.9958	184.958	45.4678	148.445	28.3793	157.178	-24.4101	167.894	-68.4675	180.539	-120.453	144.476	49.0187	136.141	98.2359	132.966	132.767	127.09	196.664	102.629	32.4689	185.313	46.0132	148.152	28.4709	157.722	-24.2895	167.927	-68.1771	180.08	-120.581	145.012	49.2832	135.804	97.6092	132.115	132.722	125.515	195.852	12.8751	4.07333	23.2482	5.77251	18.5862	3.57177	19.7868
		33	101.881	33.1185	185.52	46.5904	146.858	28.3793	157.574	-23.6163	169.879	-67.6736	184.162	-118.817	144.079	49.4157	136.141	97.4421	132.966	133.958	127.578	195.914	101.74	32.3673	184.403	45.9764	147.257	28.4002	157.989	-23.9846	169.042	-68.1223	182.027	-119.893	143.923	49.2648	135.756	97.4624	133.057	132.728	128.277	195.963	12.7636	4.06058	23.1339	5.76789	18.4739	3.56289	19.8203
		34	100.759	31.4345	182.152	46.0291	146.461	28.3793	159.162	-24.0132	170.276	-67.6736	183.545	-119.802	143.286	49.4157	134.553	96.6483	133.76	131.974	132.333	195.467	100.833	32.2595	183.499	45.9056	146.363	28.3865	158.242	-23.6588	170.004	-67.8514	183.722	-119.201	142.838	49.2795	135.703	97.3732	133.988	132.673	130.974	196.065	12.6498	4.04705	23.0206	5.75901	18.3617	3.56118	19.8519
		35	99.6362	32.5572	182.713	45.4678	145.667	27.9824	157.971	-23.2194	170.673	-68.4675	184.684	-118.385	141.698	48.6218	136.141	98.2359	134.95	132.37	132.695	197.019	99.8981	32.1848	182.68	45.8086	145.441	28.4422	158.435	-23.3139	170.905	-67.3764	185.418	-118.423	141.734	49.3494	135.712	97.3584	134.925	132.67	133.562	196.166	12.5325	4.03769	22.9178	5.74684	18.2461	3.56816	19.8761
		36	99.6362	31.9958	181.59	46.0291	144.873	28.7762	158.765	-22.8225	170.673	-66.086	184.994	-118.122	140.904	49.4157	135.347	97.0452	135.744	132.37	136.458	195.882	98.9077	32.1461	181.925	45.6977	144.478	28.5494	158.57	-22.9708	171.87	-66.7504	187.354	-117.509	140.63	49.4667	135.774	97.4214	135.865	132.776	136.06	196.273	12.4083	4.03284	22.8231	5.73292	18.1252	3.58162	19.8931
		37	97.3909	31.9958	181.59	44.9064	142.492	28.3793	159.162	-22.4256	173.054	-65.6891	189.381	-116.536	138.92	49.8126	136.141	97.4421	136.935	133.561	138.313	196.262	97.8392	32.136	181.174	45.5838	143.478	28.6794	158.661	-22.6516	172.994	-66.0457	189.688	-116.433	139.562	49.6006	135.861	97.5702	136.797	133.012	138.49	196.398	12.2742	4.03157	22.7289	5.71864	17.9998	3.59792	19.9046
		38	96.8295	31.9958	180.468	46.0291	142.889	29.1731	157.971	-22.4256	173.451	-65.6891	191.27	-115.491	138.523	49.8126	136.141	98.2359	138.126	133.561	141.685	196.924	96.712	32.1533	180.348	45.472	142.476	28.7886	158.722	-22.3534	174.243	-65.3317	192.298	-115.228	138.575	49.6742	135.938	97.8296	137.704	133.353	140.859	196.567	12.1328	4.03374	22.6252	5.70462	17.874	3.61163	19.9122
		39	95.7069	32.5572	179.906	45.4678	141.698	29.57	158.765	-22.0287	177.42	-64.1014	198.83	-112.388	137.729	50.2095	136.141	97.4421	138.523	132.767	142.79	196.062	95.5256	32.1727	179.402	45.3276	141.428	28.8243	158.804	-22.051	175.548	-64.6263	194.961	-113.958	137.657	49.64	135.987	98.2047	138.587	133.825	143.192	196.786	11.984	4.03617	22.5066	5.68649	17.7426	3.61611	19.9225
		40	94.0229	32.5572	177.661	45.4678	140.904	28.3793	158.368	-21.6318	175.436	-64.1014	195.225	-113.346	136.538	49.8126	135.347	98.6329	139.316	134.355	146.263	196.872	94.2867	32.1556	178.33	45.1526	140.309	28.7843	158.906	-21.7211	176.822	-63.959	197.466	-112.671	136.782	49.4785	136.024	98.7183	139.492	134.466	145.572	197.073	11.8286	4.03402	22.3721	5.66453	17.6022	3.61108	19.9353
		41	93.4615	31.4345	178.222	44.3451	138.523	28.3793	159.559	-21.2348	178.611	-62.9107	200.654	-111.13	136.141	49.0187	136.935	98.2359	139.713	135.149	144.354	196.8	93.0057	32.1216	177.136	44.9949	139.164	28.7206	158.97	-21.3343	178.049	-63.3274	199.797	-111.313	135.912	49.2487	136.044	99.3263	140.457	135.205	148.106	197.376	11.6679	4.02976	22.2223	5.64476	17.4585	3.60309	19.9433
		42	92.3389	32.5572	175.416	44.9064	137.332	28.7762	159.559	-21.6318	178.611	-62.5138	201.311	-111.224	134.95	48.6218	135.347	101.808	141.301	135.546	152.525	199.147	91.6984	32.097	175.835	44.9024	138.052	28.68	158.933	-20.8554	179.223	-62.7117	201.975	-109.816	135.01	49.0286	136.042	99.937	141.495	135.949	150.829	197.604	11.5039	4.02667	22.0591	5.63315	17.3191	3.598	19.9387
		43	88.9709	31.9958	174.293	44.3451	137.332	28.7762	158.368	-20.0441	181.389	-62.5138	205.472	-106.942	134.157	49.0187	136.141	100.221	143.286	137.133	154.924	197.263	90.4219	32.0795	174.494	44.8809	136.992	28.6542	158.768	-20.2521	180.287	-62.0571	203.942	-108.169	134.042	48.8866	136.038	100.395	142.534	136.578	153.505	197.636	11.3437	4.02447	21.8908	5.63045	17.1861	3.59476	19.918
		44	88.9709	31.9958	172.609	45.4678	136.141	27.9824	158.765	-19.6472	180.992	-61.323	205.28	-106.862	133.76	48.2249	136.141	100.221	143.682	138.324	155.332	197.183	89.2762	32.0891	173.174	44.9002	135.919	28.6492	158.514	-19.5584	181.183	-61.2896	205.659	-106.449	132.972	48.8528	136.015	100.697	143.481	136.934	156.003	197.479	11.2	4.02568	21.7252	5.63288	17.0515	3.59413	19.8862
		45	88.9709	31.4345	172.048	44.9064	134.95	29.57	157.971	-18.8534	182.183	-60.9261	207.272	-104.524	131.775	48.6218	136.141	101.014	144.873	136.736	159.612	197.031	88.2204	32.1426	171.871	44.9153	134.798	28.6431	158.204	-18.8123	181.93	-60.3753	207.196	-104.678	131.821	48.921	135.957	100.838	144.326	136.991	158.323	197.122	11.0675	4.03239	21.5617	5.63478	16.9108	3.59337	19.8472
		46	86.7256	32.5572	171.486	44.9064	134.157	28.3793	157.574	-17.6626	182.58	-59.3385	208.429	-102.42	130.584	49.4157	135.744	101.411	144.873	137.133	160.218	197.177	87.1859	32.2354	170.56	44.8886	133.613	28.6148	157.863	-18.0513	182.571	-59.3057	208.642	-102.858	130.643	49.059	135.861	100.796	145.093	136.778	160.504	196.534	10.9377	4.04403	21.3973	5.63142	16.7621	3.58982	19.8044
		47	86.1642	32.5572	168.68	44.9064	131.775	28.3793	157.574	-17.2657	183.771	-58.5447	210.537	-100.722	128.203	49.4157	135.744	101.014	145.27	135.943	161.752	196.375	86.1452	32.2974	169.22	44.8175	132.388	28.5834	157.504	-17.3129	183.162	-58.1267	210.068	-100.994	129.532	49.1751	135.743	100.548	145.868	136.394	162.659	195.669	10.8072	4.05181	21.2292	5.6225	16.6085	3.58588	19.7594
		48	86.1642	33.1185	168.119	44.9064	131.775	28.3793	157.971	-16.8688	181.786	-56.1632	209.202	-101.399	128.997	49.8126	135.347	99.4267	146.461	135.943	164.127	193.987	85.0485	32.2794	167.914	44.6976	131.188	28.5693	157.107	-16.5971	183.782	-56.9099	211.54	-99.0342	128.54	49.2162	135.616	100.152	146.71	135.944	164.891	194.564	10.6696	4.04955	21.0654	5.60746	16.4579	3.58411	19.7096
		49	83.3576	31.4345	166.435	44.9064	129.394	28.3793	155.59	-16.075	185.755	-55.7663	215.398	-94.7703	127.012	49.0187	135.347	99.8236	147.255	134.752	167.241	193.38	83.8681	32.1911	166.684	44.5342	130.05	28.5655	156.683	-15.8948	184.508	-55.7493	213.086	-96.9701	127.604	49.176	135.48	99.704	147.616	135.506	167.189	193.318	10.5215	4.03848	20.9111	5.58696	16.3152	3.58363	19.6564
		50	82.2349	31.9958	165.312	43.7838	128.6	29.1731	157.178	-14.8842	183.374	-53.7817	212.391	-96.8685	127.806	49.0187	135.347	98.6329	148.842	134.355	170.279	191.098	82.6501	32.0808	165.561	44.3787	129.014	28.5303	156.255	-15.2327	185.322	-54.6796	214.669	-94.8691	126.641	49.0993	135.307	99.2506	148.523	135.097	169.452	191.999	10.3687	4.02464	20.7702	5.56745	16.1852	3.57922	19.6027
		51	82.2349	31.9958	163.628	43.7838	127.806	28.7762	154.399	-14.8842	186.946	-53.7817	217.829	-90.6908	125.424	48.2249	135.347	98.2359	150.033	135.149	171.886	190.078	81.4388	31.9868	164.567	44.2854	128.098	28.4265	155.854	-14.6424	186.157	-53.697	216.227	-92.8259	125.582	49.0388	135.053	98.8122	149.357	134.694	171.586	190.643	10.2168	4.01285	20.6455	5.55575	16.0703	3.5662	19.5523
		52	79.4283	32.5572	164.189	44.9064	127.806	27.9824	156.384	-13.6935	187.74	-52.9879	218.035	-90.9532	124.631	49.0187	134.95	98.6329	150.033	135.149	172.685	189.99	80.226	31.8925	163.664	44.2648	127.234	28.2738	155.49	-14.1394	186.86	-52.7165	217.665	-90.9336	124.427	49.0098	134.682	98.3435	150.066	134.164	173.583	189.19	10.0646	4.00102	20.5321	5.55316	15.9619	3.54704	19.5067
		53	78.8669	30.8732	163.628	43.7838	126.218	27.9824	156.384	-14.0904	187.343	-51.4002	219.502	-90.1564	123.043	49.8126	133.76	99.0298	150.43	133.164	177.136	187.847	79.0572	31.8123	162.723	44.2824	126.338	28.1365	155.079	-13.7381	187.313	-51.6486	218.966	-89.1434	123.202	48.9419	134.194	97.7235	150.675	133.434	175.442	187.522	9.91798	3.99096	20.4141	5.55537	15.8496	3.52981	19.4552
		54	77.7443	31.4345	161.944	44.3451	125.424	27.9824	153.605	-13.2966	186.549	-50.2095	219.421	-87.0416	122.249	49.0187	134.553	97.4421	150.43	131.974	175.844	187.248	77.9092	31.7651	161.701	44.3202	125.367	28.0497	154.671	-13.4387	187.502	-50.415	220.219	-87.4237	121.938	48.8024	133.597	96.9279	151.208	132.518	177.196	185.603	9.77396	3.98503	20.2859	5.56012	15.7277	3.51893	19.404
		55	77.183	32.5572	160.26	44.3451	125.028	27.9824	153.605	-12.5028	187.343	-48.6218	221.076	-84.7363	120.265	48.2249	132.966	96.2514	151.621	131.577	179.123	183.656	76.7295	31.7433	160.604	44.3599	124.284	28.0353	154.355	-13.2399	187.414	-48.9314	221.523	-85.767	120.671	48.5928	132.911	95.9958	151.659	131.43	178.881	183.465	9.62596	3.98231	20.1483	5.56509	15.5919	3.51712	19.3643
		56	76.0603	31.9958	158.576	44.9064	123.043	27.5854	154.002	-13.6935	188.137	-49.4157	222.289	-85.1563	119.074	48.6218	131.775	94.2668	152.018	129.989	180.506	180.263	75.4487	31.6694	159.512	44.3526	123.073	28.0973	154.184	-13.1319	186.944	-47.0706	222.924	-84.1712	119.449	48.3823	132.22	95.1041	151.933	130.119	180.518	181.322	9.46528	3.97302	20.0114	5.56418	15.4399	3.5249	19.3428
		57	74.3763	31.4345	159.137	44.9064	121.455	28.7762	154.002	-12.8997	187.343	-45.8434	224.312	-82.3727	118.28	47.4311	130.981	93.0761	152.811	128.798	182.523	177.417	74.0493	31.5519	158.439	44.2604	121.789	28.2174	154.1	-13.0435	185.975	-44.7173	224.389	-82.5426	118.28	48.2153	131.637	94.4468	151.911	128.534	182.101	179.434	9.28973	3.95829	19.8767	5.55261	15.2788	3.53996	19.3323
		58	72.6923	30.8732	157.453	43.2225	121.058	28.3793	154.399	-13.6935	185.358	-41.4774	227.962	-79.7119	117.089	47.828	131.378	94.6637	152.415	127.607	184.575	177.971	72.6031	31.4433	157.344	44.1384	120.482	28.3628	154.005	-12.9295	184.583	-42.0423	225.809	-80.8454	117.128	48.0998	131.194	94.0573	151.534	126.629	183.649	177.839	9.1083	3.94466	19.7394	5.53731	15.1149	3.55821	19.3204
		59	69.8857	31.4345	155.769	43.7838	118.28	28.3793	154.399	-12.1058	181.389	-38.699	224.808	-81.479	116.295	48.6218	130.584	93.8699	150.827	125.226	184.194	176.912	71.2095	31.3846	156.196	44.0554	119.205	28.5088	153.8	-12.7712	182.942	-39.2969	227.106	-79.034	115.948	48.0168	130.89	93.9177	150.8	124.388	185.224	176.486	8.93346	3.9373	19.5953	5.5269	14.9546	3.57652	19.2947
		60	70.447	31.4345	155.769	44.3451	117.486	28.3793	152.811	-12.1058	180.595	-35.1268	228.923	-75.1696	114.708	47.828	130.584	93.473	149.636	122.448	184.889	176.062	69.9657	31.3579	155.004	44.0283	118.019	28.6643	153.434	-12.5972	181.348	-36.736	228.35	-77.0032	114.699	47.8857	130.696	93.9781	149.847	121.926	186.973	175.214	8.77742	3.93395	19.4457	5.5235	14.8059	3.59603	19.2488
		61	67.6403	31.4345	154.085	43.7838	117.883	29.1731	152.415	-12.5028	179.405	-33.9361	229.82	-73.9716	114.311	48.6218	130.981	94.6637	148.049	118.082	189.199	174.543	68.8545	31.3391	153.753	44.0279	116.906	28.8143	152.907	-12.3811	179.935	-34.4959	229.457	-74.81	113.37	47.683	130.563	94.2007	148.82	119.466	188.917	173.95	8.63802	3.93159	19.2888	5.52344	14.6663	3.61485	19.1827
		62	68.2017	31.4345	151.84	43.7838	115.502	28.7762	154.399	-12.8997	179.008	-33.5391	230.132	-76.4176	111.533	46.6373	129.791	93.8699	148.049	116.891	191.211	171.313	67.8406	31.3139	152.503	44.045	115.799	28.9238	152.14	-12.0291	178.717	-32.5245	230.353	-72.3368	111.989	47.4243	130.438	94.5163	147.828	117.274	190.859	172.736	8.51082	3.92843	19.132	5.52559	14.5274	3.62858	19.0865
		63	67.6403	31.4345	150.717	44.3451	114.708	29.1731	150.033	-11.7089	177.817	-30.7607	231.552	-67.6076	109.945	47.0342	130.584	95.0606	146.858	114.509	194.014	170.867	66.809	31.2857	151.322	44.0396	114.693	28.9752	151.135	-11.5011	177.658	-30.7416	230.999	-69.5976	110.642	47.1619	130.266	94.8459	146.913	115.471	192.602	171.6	8.38141	3.92489	18.9839	5.52491	14.3886	3.63503	18.9603
		64	65.9563	30.3119	150.717	44.9064	114.311	29.57	148.842	-10.1213	176.229	-28.7762	230.534	-65.7666	109.548	47.4311	130.584	95.4576	145.667	113.319	194.356	170.977	65.647	31.2688	150.25	43.9621	113.595	28.9594	149.936	-10.7967	176.722	-29.0916	231.369	-66.6882	109.405	46.9406	129.985	95.105	146.109	114.113	193.999	170.52	8.23563	3.92277	18.8493	5.51519	14.2509	3.63305	18.81
		65	65.395	31.4345	148.472	43.7838	111.533	27.9824	149.636	-10.5182	176.626	-27.9824	232.622	-64.2149	107.96	45.8434	129.791	95.8545	146.064	113.319	197.175	168.169	64.3514	31.2761	149.236	43.7988	112.513	28.8906	148.602	-9.97331	175.897	-27.5762	231.457	-63.7487	108.263	46.7546	129.538	95.196	145.444	113.119	195.069	169.323	8.07309	3.92368	18.7221	5.4947	14.1152	3.62442	18.6425
		66	62.027	31.9958	149.033	42.6611	111.929	29.1731	148.842	-10.1213	175.436	-27.5854	231.462	-64.3792	107.563	47.0342	128.203	95.4576	144.079	112.922	194.692	168.596	62.9979	31.2289	148.242	43.6437	111.498	28.8222	147.043	-9.02305	175.138	-26.1538	231.216	-60.7216	107.192	46.6234	128.948	95.0778	144.927	112.315	195.955	167.843	7.90329	3.91776	18.5975	5.47525	13.9878	3.61584	18.447
		67	60.9044	31.4345	146.788	43.7838	109.945	28.7762	144.079	-6.54906	173.451	-22.4256	231.032	-53.5507	106.373	47.0342	128.6	95.0606	144.476	112.128	195.922	167.432	61.7067	31.0887	147.219	43.5501	110.551	28.7581	145.356	-8.0421	174.476	-24.9021	230.708	-57.7981	106.166	46.5188	128.235	94.8048	144.56	111.565	196.93	165.863	7.7413	3.90018	18.4691	5.4635	13.869	3.6078	18.2354
		68	60.9044	30.3119	147.349	43.2225	109.548	28.3793	142.889	-6.15215	173.451	-23.6163	228.709	-55.1922	105.182	45.8434	127.806	94.2668	144.873	111.334	197.699	164.16	60.5701	30.8568	146.116	43.5413	109.652	28.6938	143.698	-7.14429	173.947	-23.9032	230.037	-55.216	105.17	46.4166	127.402	94.4644	144.329	110.773	198.245	163.201	7.59871	3.87108	18.3307	5.4624	13.7562	3.59973	18.0274
		69	59.2204	30.3119	143.981	43.7838	109.548	28.7762	141.698	-7.34289	174.245	-23.6163	230.106	-51.547	103.991	46.2404	126.615	93.473	144.079	109.35	199.753	159.962	59.5507	30.6017	144.921	43.5938	108.75	28.6411	142.196	-6.34732	173.496	-23.0873	229.32	-53.0371	104.232	46.3545	126.451	94.1883	144.171	109.945	199.965	159.894	7.47083	3.83909	18.1808	5.46898	13.643	3.59312	17.839
		70	58.659	30.8732	143.981	43.7838	107.96	28.7762	140.904	-5.75524	173.848	-23.6163	227.798	-52.8664	102.8	46.6373	124.631	92.6792	143.682	108.953	199.789	156.876	58.6258	30.3308	143.696	43.6724	107.78	28.5809	140.844	-5.55182	173.006	-22.288	228.582	-51.1392	103.381	46.3188	125.448	94.0859	144.081	109.136	202.105	156.094	7.3548	3.8051	18.0271	5.47885	13.5214	3.58557	17.6694
		71	58.0977	29.7505	142.297	43.7838	106.373	28.3793	140.11	-4.5645	171.863	-20.8379	228.074	-49.646	103.197	46.2404	124.631	95.4576	144.476	108.556	207.126	149.905	57.7515	30.0397	142.459	43.7592	106.762	28.5097	139.57	-4.73909	172.463	-21.4526	227.846	-49.3485	102.594	46.2884	124.441	94.1183	144.038	108.35	204.525	152.024	7.24511	3.76858	17.872	5.48973	13.3937	3.57663	17.5095
[truncated: 198 more columns]

## Sheet: C0069
			RAW COORDINATES																				SPLINE																				mm
			HEAD		TAIL		LEFT COXAE		LEFT FT		LEFT TT		LEFT TIP		RIGHT COXAE		RIGHT FT		RIGHT TT		RIGHT TIP		HEAD		TAIL		LEFT COXAE		LEFT FT		LEFT TT		LEFT TIP		RIGHT COXAE		RIGHT FT		RIGHT TT		RIGHT TIP		HEAD		TAIL		LEFT COXAE		LEFT FT
SCALE		Frame	X	Y	X	Y	X	Y	X	Y	X	Y	X	Y	X	Y	X	Y	X	Y	X	Y	X	Y	X	Y	X	Y	X	Y	X	Y	X	Y	X	Y	X	Y	X	Y	X	Y	X	Y	X	Y	X	Y	X
X	Y	-2	-276.238	107.822	-351.98	139.455	-308.762	133.218	-264	166	-229.865	196.466	-190.256	231.817	-316.337	113.614	-306.5	63.5	-300.743	26.7327	-291.208	-34.1533	-275.68	107.666	-351.861	139.381	-309.147	133.351	-263.447	165.673	-229.552	196.293	-190.089	231.926	-316.39	113.506	-306.218	62.9142	-300.617	26.3293	-291.285	-34.7825	-32.302	12.6155	-41.2282	16.3315	-36.2234	15.625	-30.8687
512.018	121.257	-1	-276.238	107.822	-351.98	139.455	-308.762	133.218	-264	166	-229.865	196.466	-190.256	231.817	-316.337	113.614	-306.5	63.5	-300.743	26.7327	-291.208	-34.1533	-275.68	107.666	-351.861	139.381	-309.147	133.351	-263.447	165.673	-229.552	196.293	-190.089	231.926	-316.39	113.506	-306.218	62.9142	-300.617	26.3293	-291.285	-34.7825	-32.302	12.6155	-41.2282	16.3315	-36.2234	15.625	-30.8687
510.827	35.9206	0	-276.238	107.822	-351.98	139.455	-308.762	133.218	-264	166	-229.865	196.466	-190.256	231.817	-316.337	113.614	-306.5	63.5	-300.743	26.7327	-291.208	-34.1533	-275.68	107.666	-351.861	139.381	-309.147	133.351	-263.447	165.673	-229.552	196.293	-190.089	231.926	-316.39	113.506	-306.218	62.9142	-300.617	26.3293	-291.285	-34.7825	-32.302	12.6155	-41.2282	16.3315	-36.2234	15.625	-30.8687
		1	-276.238	107.822	-351.98	139.455	-308.762	133.218	-264	166	-229.865	196.466	-190.256	231.817	-316.337	113.614	-306.5	63.5	-300.743	26.7327	-291.208	-34.1533	-275.68	107.666	-351.861	139.381	-309.147	133.351	-263.447	165.673	-229.552	196.293	-190.089	231.926	-316.39	113.506	-306.218	62.9142	-300.617	26.3293	-291.285	-34.7825	-32.302	12.6155	-41.2282	16.3315	-36.2234	15.625	-30.8687
DISTANCE (mm)		2	-274.901	106.931	-351.535	139.01	-309.653	133.663	-263	165	-229.865	195.904	-190.716	232.417	-316.337	113.168	-306.5	62	-300.743	24.9505	-291.322	-35.671	-275.348	107.532	-351.68	139.312	-308.893	133.513	-263.632	165.916	-230.542	196.261	-190.787	232.727	-316.187	113.32	-306.433	62.4782	-301.021	25.4881	-292.144	-35.3099	-32.2631	12.5997	-41.2071	16.3235	-36.1936	15.644	-30.8903
pixel	mm	3	-274.455	107.822	-351.089	139.455	-307.871	133.663	-264	166.5	-231.549	197.027	-192.005	234.226	-315.891	113.168	-306	61.5	-302.079	24.505	-295.583	-36.7928	-275.121	107.409	-351.521	139.248	-308.584	133.652	-263.914	166.197	-231.576	196.254	-191.52	233.493	-315.979	113.151	-306.711	62.1514	-301.442	24.7146	-292.957	-35.7147	-32.2364	12.5853	-41.1884	16.316	-36.1574	15.6603	-30.9233
85.3446	10	4	-274.901	107.376	-351.535	139.01	-308.317	133.663	-263.5	166.5	-232.672	195.343	-191.322	234.03	-315.446	112.723	-307	62	-301.188	24.0594	-292.033	-35.7036	-275.013	107.239	-351.366	139.159	-308.247	133.766	-264.3	166.432	-232.596	196.271	-192.326	234.171	-315.777	112.996	-307.099	61.9505	-301.881	23.9916	-293.654	-35.9648	-32.2239	12.5654	-41.1702	16.3056	-36.1179	15.6737	-30.9686
1	0.117172	5	-275.347	106.931	-351.535	139.901	-308.317	133.663	-265	168	-233.794	197.027	-192.626	235.321	-315.891	113.168	-308	62	-302.525	23.6139	-294.043	-35.8529	-274.926	107.004	-351.138	139.027	-307.838	133.858	-264.761	166.551	-233.524	196.381	-193.279	234.798	-315.574	112.84	-307.541	61.7836	-302.393	23.2549	-294.455	-36.1868	-32.2137	12.5378	-41.1435	16.2901	-36.07	15.6844	-31.0226
		6	-274.901	107.376	-351.089	138.564	-307.871	134.109	-266	166	-234.356	196.466	-194.794	234.554	-315.446	112.723	-308	62	-302.97	22.2772	-295.584	-36.0604	-274.735	106.72	-350.784	138.853	-307.314	133.908	-265.163	166.557	-234.297	196.564	-194.3	235.434	-315.324	112.639	-307.958	61.5503	-302.965	22.4555	-295.426	-36.4963	-32.1913	12.5045	-41.102	16.2697	-36.0087	15.6903	-31.0697
LENGTH (mm)		7	-274.901	106.04	-349.752	138.119	-306.089	134.109	-265	166	-234.917	197.588	-196.833	237.577	-315	112.723	-308	61	-303.861	21.8317	-297.614	-37.2961	-274.371	106.425	-350.331	138.755	-306.734	133.869	-265.414	166.653	-234.898	196.851	-195.174	236.158	-315.019	112.385	-308.34	61.202	-303.57	21.5883	-296.504	-36.9305	-32.1486	12.47	-41.0491	16.2582	-35.9406	15.6857	-31.099
Body	9.84821	8	-274.01	105.594	-350.644	138.564	-306.089	133.663	-266.5	166.5	-235.478	195.904	-194.762	234.498	-314.554	111.832	-309	61	-303.861	21.8317	-296.143	-37.0035	-273.851	106.214	-349.813	138.782	-306.19	133.739	-265.511	166.951	-235.329	197.349	-195.893	237.076	-314.678	112.128	-308.665	60.7433	-304.216	20.6588	-297.743	-37.487	-32.0877	12.4453	-40.9883	16.2613	-35.8769	15.6704	-31.1104
R. Femur	6.69879	9	-272.673	105.594	-347.97	139.01	-305.198	133.663	-265	167	-236.601	197.588	-197.747	239.437	-314.554	111.386	-309.5	60.5	-305.198	18.7129	-299.378	-37.8236	-273.237	106.16	-349.268	138.93	-305.758	133.532	-265.495	167.493	-235.6	198.15	-196.512	238.247	-314.317	111.925	-308.909	60.1932	-304.915	19.7212	-299.201	-38.1502	-32.0157	12.439	-40.9245	16.2787	-35.8263	15.6462	-31.1085
R. Tibia	5.15833	10	-272.228	106.485	-349.307	139.01	-306.089	133.218	-265.5	168.5	-234.917	199.272	-195.823	238.608	-313.663	112.277	-308.5	59.5	-305.644	17.3762	-301.813	-39.1168	-272.641	106.192	-348.757	139.105	-305.417	133.28	-265.491	168.175	-235.779	199.191	-197.132	239.538	-313.944	111.806	-309.083	59.5994	-305.665	18.9856	-300.822	-38.8581	-31.9459	12.4428	-40.8646	16.2992	-35.7863	15.6167	-31.1081
R. Tarsus	2.13786	11	-272.673	106.931	-348.416	139.901	-304.752	132.772	-265.5	169	-235.478	201.518	-198.45	241.624	-313.218	111.386	-309	58	-306.98	19.604	-303.808	-40.7068	-272.078	106.151	-348.208	139.225	-305.095	133.027	-265.596	168.828	-236.055	200.266	-197.914	240.839	-313.586	111.724	-309.279	59.0622	-306.487	18.4977	-302.535	-39.4885	-31.8799	12.4379	-40.8002	16.3133	-35.7486	15.587	-31.1205
L. Femur	6.28158	12	-271.337	106.485	-347.97	139.901	-304.752	132.772	-265.5	170	-236.601	200.956	-198.049	242.252	-314.109	111.832	-310	59.5	-305.644	18.7129	-299.502	-38.7843	-271.506	105.927	-347.591	139.22	-304.785	132.8	-265.887	169.316	-236.507	201.206	-198.898	241.98	-313.224	111.669	-309.519	58.6404	-307.428	18.0754	-304.463	-39.9881	-31.8129	12.4117	-40.728	16.3127	-35.7123	15.5604	-31.1545
L. Tibia	5.00487	13	-270.446	105.149	-346.634	138.119	-304.752	132.327	-265.5	170	-236.601	201.518	-198.699	242.854	-312.327	111.832	-310	58.5	-309.208	17.3762	-308.097	-40.325	-270.945	105.554	-346.94	139.137	-304.453	132.588	-266.412	169.566	-237.101	202.016	-200.123	242.877	-312.808	111.605	-309.779	58.2677	-308.538	17.6611	-306.772	-40.445	-31.7472	12.368	-40.6517	16.303	-35.6734	15.5356	-31.2161
L. Tarsus	1.65061	14	-270.446	104.703	-346.188	138.564	-304.307	133.218	-267.5	169	-239.969	202.079	-204.269	244.973	-312.327	111.386	-309.5	56.5	-310.099	17.3762	-311.013	-42.3317	-270.396	105.165	-346.341	139.119	-304.056	132.345	-267.124	169.635	-237.749	202.701	-201.43	243.491	-312.386	111.517	-310.11	57.9939	-309.65	17.3167	-308.975	-40.7906	-31.6828	12.3224	-40.5815	16.3009	-35.6268	15.5072	-31.2994
		15	-270.446	104.703	-345.743	139.01	-303.416	131.881	-268.5	170	-237.162	204.324	-201.855	242.996	-311.436	110.941	-310	58.5	-311.436	15.5941	-313.305	-40.288	-269.786	104.812	-345.836	139.133	-303.615	132.071	-267.864	169.604	-238.503	203.128	-202.7	243.934	-311.962	111.415	-310.557	57.7897	-310.668	17.0926	-310.794	-41.0433	-31.6113	12.281	-40.5223	16.3025	-35.5752	15.475	-31.3861
mg	15.6	16	-269.554	105.149	-344.406	139.901	-302.525	130.99	-268	169.5	-239.407	204.886	-205.878	246.382	-311.881	111.386	-311.5	58	-311.436	18.2673	-311.34	-40.8432	-269.049	104.501	-345.442	139.074	-303.171	131.793	-268.485	169.551	-239.473	203.152	-203.88	244.36	-311.503	111.295	-311.117	57.5793	-311.575	16.9777	-312.197	-41.2734	-31.525	12.2446	-40.4761	16.2955	-35.5231	15.4424	-31.4589
		17	-267.772	103.812	-346.188	139.455	-302.97	132.327	-270	169	-239.969	201.518	-202.939	241.614	-311.436	112.277	-312	57.5	-311.881	17.3762	-311.707	-41.3429	-268.24	104.205	-345.113	138.797	-302.734	131.569	-268.951	169.548	-240.781	202.806	-205.146	245.004	-310.904	111.074	-311.664	57.2611	-312.5	16.7979	-313.679	-41.5745	-31.4302	12.21	-40.4376	16.2631	-35.472	15.4162	-31.5136
		18	-266.881	103.812	-345.297	138.564	-302.97	130.99	-269	169	-241.653	203.202	-207.273	246.199	-310.545	110.941	-312.5	57.5	-313.663	16.4851	-315.303	-41.3036	-267.489	103.977	-344.691	138.304	-302.222	131.348	-269.211	169.663	-242.434	202.376	-206.803	246.214	-310.12	110.711	-312.128	56.8502	-313.552	16.5303	-315.599	-41.92	-31.3423	12.1832	-40.3881	16.2054	-35.4119	15.3903	-31.544
		19	-266.881	103.812	-343.96	136.782	-301.188	130.99	-269	170	-245.021	199.834	-207.076	247.042	-308.762	109.158	-312	55.5	-314.109	16.0396	-317.275	-43.2025	-266.859	103.83	-344.157	137.73	-301.587	131.146	-269.337	169.861	-244.29	202.055	-208.932	247.922	-309.209	110.349	-312.514	56.4347	-314.75	16.2799	-317.992	-42.2127	-31.2684	12.1659	-40.3256	16.1382	-35.3376	15.3667	-31.5588
		20	-266.436	103.812	-342.624	136.782	-301.188	131.881	-270	171.5	-245.582	203.202	-209.685	249.807	-307.871	109.604	-313.5	55.5	-316.337	15.5941	-320.508	-43.0945	-266.304	103.738	-343.627	137.245	-300.882	130.935	-269.391	169.971	-246.099	202.012	-211.561	249.909	-308.299	110.172	-312.864	56.181	-316.079	16.1659	-320.758	-42.2815	-31.2034	12.1552	-40.2635	16.0812	-35.2549	15.3419	-31.5651
		21	-265.545	103.812	-343.515	137.228	-299.406	130.099	-269	169.5	-248.95	201.518	-216.54	253.273	-307.426	110.495	-313	56	-317.673	16.0396	-324.481	-42.1742	-265.774	103.675	-343.112	136.844	-300.155	130.742	-269.434	169.969	-247.638	202.24	-214.288	251.817	-307.429	110.149	-313.221	56.0795	-317.461	16.2163	-323.66	-42.1534	-31.1413	12.1478	-40.2031	16.0343	-35.1698	15.3193	-31.5702
		22	-265.545	103.366	-342.624	136.337	-299.406	129.653	-269	170.5	-250.073	202.64	-218.843	255.672	-306.535	110.495	-313	56.5	-318.564	16.4851	-326.614	-41.4013	-265.219	103.621	-342.578	136.482	-299.434	130.617	-269.535	169.898	-248.732	202.689	-216.627	253.301	-306.598	110.186	-313.638	56.0474	-318.816	16.4138	-326.45	-41.9356	-31.0763	12.1415	-40.1406	15.9919	-35.0853	15.3046	-31.582
		23	-265.099	103.366	-342.178	136.337	-299.406	130.99	-269.5	169	-248.95	203.763	-219.201	254.088	-306.089	110.05	-314	56.5	-320.792	16.4851	-330.541	-40.9495	-264.579	103.575	-341.955	136.116	-298.663	130.573	-269.737	169.903	-249.391	203.32	-218.313	254.306	-305.762	110.197	-314.17	55.9416	-320.111	16.6632	-328.98	-41.7969	-31.0013	12.1361	-40.0675	15.949	-34.9949	15.2995	-31.6056
		24	-263.762	104.257	-341.733	135.891	-298.515	131.881	-270	169	-248.95	204.886	-219.989	254.258	-305.198	110.495	-315	56	-321.238	17.3762	-330.759	-41.579	-263.85	103.497	-341.215	135.712	-297.78	130.464	-269.974	170.144	-249.858	204.057	-219.54	255.159	-304.886	110.154	-314.76	55.7114	-321.305	16.8753	-331.216	-41.7872	-30.9158	12.1269	-39.9808	15.9016	-34.8915	15.2867	-31.6334
		25	-262.426	102.921	-339.95	135	-295.396	129.208	-271.5	171	-249.511	204.324	-217.062	253.502	-303.861	109.604	-315.5	55	-322.574	16.9307	-333.558	-42.1797	-263.11	103.331	-340.384	135.269	-296.854	130.217	-270.128	170.632	-250.325	204.917	-220.729	256.211	-303.99	110.033	-315.312	55.4128	-322.442	16.9562	-333.336	-41.8085	-30.8291	12.1075	-39.8835	15.8497	-34.783	15.2578	-31.6515
		26	-262.426	103.366	-339.059	135	-295.842	129.653	-270	171	-252.318	204.324	-223.671	258.314	-302.97	110.495	-316	54.5	-323.02	17.3762	-334.365	-42.6222	-262.421	103.113	-339.555	134.809	-296.035	129.946	-270.126	171.193	-250.813	206.029	-222.26	257.576	-303.146	109.837	-315.764	55.1487	-323.588	16.8765	-335.518	-41.7154	-30.7484	12.0819	-39.7864	15.7959	-34.687	15.226	-31.6512
		27	-261.535	102.475	-338.614	134.554	-295.842	130.099	-269	173.5	-252.318	206.57	-224.482	261.751	-302.079	109.158	-316.5	55	-324.802	16.4851	-337.328	-41.6241	-261.744	102.858	-338.761	134.328	-295.273	129.649	-270.104	171.63	-251.227	207.421	-224.052	258.933	-302.418	109.55	-316.092	54.9489	-324.802	16.6411	-337.921	-41.4381	-30.6691	12.0521	-39.6934	15.7394	-34.5977	15.1913	-31.6486
		28	-261.535	102.921	-338.614	133.663	-294.505	129.653	-270.5	172.5	-247.827	211.06	-220.401	257.706	-301.634	109.604	-316	55.5	-326.584	16.9307	-342.157	-39.8194	-260.999	102.569	-337.935	133.857	-294.494	129.292	-270.123	171.913	-251.767	208.77	-226.132	260.24	-301.807	109.197	-316.354	54.7401	-326.07	16.3112	-340.493	-41.0686	-30.5818	12.0182	-39.5965	15.6843	-34.5064	15.1495	-31.6509
		29	-260.644	102.475	-337.277	133.663	-293.614	128.762	-270.5	171	-255.125	209.938	-234.198	262.935	-300.743	108.267	-316.5	54	-327.03	15.5941	-342.635	-41.3255	-260.111	102.248	-337.007	133.444	-293.647	128.867	-270.195	172.123	-252.603	209.73	-228.398	261.54	-301.285	108.821	-316.623	54.4556	-327.372	15.9797	-343.164	-40.6965	-30.4777	11.9807	-39.4878	15.6359	-34.4072	15.0996	-31.6593
		30	-257.97	101.584	-335.495	132.772	-293.168	128.317	-270	170	-253.441	210.499	-232.591	261.491	-301.634	108.713	-317	55	-327.921	14.703	-342.855	-40.402	-259.084	101.922	-336.001	133.135	-292.736	128.456	-270.291	172.569	-253.533	210.211	-230.173	262.833	-300.745	108.464	-316.956	54.1266	-328.753	15.7997	-346.03	-40.2721	-30.3574	11.9424	-39.3699	15.5997	-34.3005	15.0514	-31.6705
		31	-259.307	101.584	-334.604	132.327	-291.386	127.871	-270	175	-253.441	211.622	-229.276	265.064	-300.297	108.267	-317	53.5	-331.04	17.3762	-352.806	-38.6298	-257.979	101.653	-334.989	132.986	-291.769	128.128	-270.444	173.296	-254.557	210.257	-231.487	264.138	-300.033	108.12	-317.377	53.7767	-330.195	15.8541	-349.067	-39.7933	-30.2279	11.9109	-39.2513	15.5823	-34.1872	15.013	-31.6885
		32	-256.634	101.139	-334.604	133.218	-291.386	127.871	-271	174.5	-256.247	209.938	-233.012	265.752	-298.96	107.376	-317.5	53	-331.485	15.5941	-352.115	-39.5841	-256.764	101.464	-333.966	132.985	-290.799	127.919	-270.643	174	-255.712	210.008	-232.85	265.364	-299.115	107.803	-317.897	53.5286	-331.58	16.1088	-351.907	-39.2573	-30.0856	11.8887	-39.1315	15.5822	-34.0735	14.9886	-31.7118
		33	-254.406	101.584	-332.822	132.772	-288.713	127.426	-271	174.5	-256.809	208.254	-232.691	265.618	-298.515	107.822	-319	53	-332.822	15.1485	-352.904	-39.8468	-255.554	101.34	-332.875	133.02	-289.863	127.823	-270.812	174.551	-256.891	209.811	-234.541	266.521	-298.018	107.542	-318.46	53.4775	-332.879	16.6909	-354.614	-38.5108	-29.9438	11.8742	-39.0037	15.5862	-33.9638	14.9773	-31.7316
		34	-255.297	101.584	-332.376	133.663	-289.604	128.317	-270.5	175	-258.493	208.254	-236.931	267.968	-296.733	107.376	-319	53.5	-334.158	17.8218	-357.651	-37.473	-254.439	101.225	-331.728	132.969	-289.016	127.793	-270.927	174.947	-258.013	210.022	-236.718	267.669	-296.778	107.321	-318.958	53.6179	-334.072	17.6504	-357.35	-37.4527	-29.8131	11.8607	-38.8692	15.5802	-33.8646	14.9738	-31.745
		35	-252.178	100.693	-329.703	133.218	-288.267	127.871	-271.5	175.5	-259.054	210.499	-238.382	268.63	-295.842	106.931	-319.5	54	-335.941	19.1584	-361.681	-35.3912	-253.42	101.117	-330.611	132.75	-288.227	127.775	-270.96	175.203	-259.051	210.598	-239.298	268.78	-295.489	107.151	-319.351	53.8447	-335.141	18.8132	-360.069	-36.1885	-29.6937	11.848	-38.7383	15.5546	-33.7721	14.9717	-31.749
		36	-253.069	101.139	-328.812	132.327	-286.931	127.426	-271	175	-260.177	213.306	-244.124	270.119	-293.614	106.931	-320	54.5	-335.941	19.604	-361.07	-35.407	-252.459	101.028	-329.613	132.326	-287.456	127.733	-270.889	175.342	-260	211.346	-242.109	269.808	-294.276	107.051	-319.626	54.0352	-336.095	19.9712	-362.736	-34.8435	-29.5812	11.8377	-38.6214	15.5049	-33.6818	14.9667	-31.7406
		37	-252.178	101.139	-329.703	131.881	-287.376	127.871	-270.5	176	-261.299	211.622	-245.781	271.703	-292.277	106.931	-319.5	55	-335.941	21.8317	-363.397	-33.5609	-251.446	100.949	-328.725	131.795	-286.707	127.681	-270.73	175.428	-260.911	211.957	-244.943	270.721	-293.285	107.008	-319.808	54.0946	-337.064	20.9699	-365.516	-33.4506	-29.4625	11.8284	-38.5173	15.4427	-33.5941	14.9607	-31.722
		38	-250.396	100.693	-327.475	130.99	-285.594	127.426	-271	175	-260.177	211.622	-242.985	269.79	-292.277	106.931	-319.5	54	-337.723	23.6139	-370.336	-30.7684	-250.325	100.872	-327.815	131.262	-285.926	127.595	-270.534	175.503	-261.862	212.414	-247.872	271.56	-292.545	106.981	-319.97	54.0345	-338.141	21.6426	-368.314	-32.0988	-29.3311	11.8193	-38.4108	15.3803	-33.5025	14.9506	-31.699
		39	-248.614	100.693	-327.03	130.099	-284.703	127.426	-270	175	-263.545	214.428	-254.03	272.545	-293.168	107.376	-320	53.5	-339.505	20.9406	-370.796	-31.2927	-249.17	100.812	-326.853	130.838	-285.121	127.459	-270.339	175.66	-262.937	212.696	-250.988	272.453	-291.907	106.909	-320.139	54.0121	-339.237	22.0037	-370.743	-30.8655	-29.1957	11.8124	-38.298	15.3305	-33.4082	14.9347	-31.6762
		40	-248.168	101.139	-326.584	130.545	-285.149	127.426	-270	176	-264.106	211.06	-253.613	273.476	-290.495	106.931	-320	54	-341.733	21.3861	-374.811	-28.2541	-248.07	100.759	-325.786	130.568	-284.251	127.237	-270.235	175.917	-264.011	212.741	-253.823	273.311	-291.202	106.739	-320.26	54.1966	-340.148	22.3582	-372.597	-29.6778	-29.0668	11.8061	-38.173	15.2989	-33.3063	14.9086	-31.6639
		41	-246.386	100.248	-324.356	130.545	-282.921	127.426	-270	176.5	-265.229	214.428	-257.663	274.57	-290.495	106.485	-321.5	54	-340.396	23.1683	-373.15	-30.2749	-247.047	100.712	-324.655	130.382	-283.289	126.897	-270.254	176.188	-264.994	212.547	-256.148	274.011	-290.366	106.5	-320.216	54.6636	-340.847	22.8362	-373.964	-28.3394	-28.947	11.8006	-38.0405	15.2772	-33.1935	14.8688	-31.6662
		42	-246.386	100.693	-323.02	130.099	-282.475	126.089	-270	176	-266.913	211.622	-261.465	274.474	-290.941	105.594	-320	55.5	-341.733	23.1683	-375.141	-26.5333	-246.084	100.672	-323.535	130.188	-282.226	126.439	-270.396	176.377	-265.831	212.154	-257.89	274.459	-289.347	106.245	-319.92	55.4361	-341.384	23.4892	-375.024	-26.6626	-28.8341	11.7959	-37.9093	15.2543	-33.0689	14.8151	-31.6829
		43	-245.495	100.693	-322.129	130.099	-281.139	126.089	-271.5	177	-265.79	211.06	-255.158	274.483	-287.376	106.04	-319	56	-341.733	24.0594	-376.314	-24.5298	-245.089	100.61	-322.521	129.908	-281.096	125.941	-270.589	176.427	-266.551	211.687	-259.299	274.66	-288.098	106.024	-319.443	56.4249	-341.91	24.3115	-376.056	-24.5968	-28.7176	11.7886	-37.7904	15.2216	-32.9366	14.7568	-31.7055
		44	-244.158	100.693	-321.238	130.545	-279.802	125.198	-270	176.5	-266.913	211.622	-261.345	274.964	-286.485	106.04	-319	57.5	-341.287	25.396	-375.367	-23.6956	-244.004	100.479	-321.592	129.47	-279.945	125.455	-270.729	176.26	-267.316	211.269	-261.049	274.634	-286.794	105.787	-318.905	57.5141	-342.579	25.269	-377.303	-22.1612	-28.5905	11.7733	-37.6816	15.1703	-32.8017	14.6998	-31.7219
		45	-241.931	100.248	-322.129	128.762	-278.465	125.198	-271.5	176.5	-268.035	210.499	-261.479	274.834	-285.594	106.04	-318.5	59.5	-343.515	25.396	-376.96	-20.2019	-242.846	100.255	-320.644	128.861	-278.828	125.031	-270.805	175.872	-268.203	210.924	-263.358	274.385	-285.551	105.476	-318.368	58.5285	-343.487	26.2844	-378.98	-19.4155	-28.4548	11.747	-37.5705	15.0989	-32.6708	14.6501	-31.7308
		46	-241.931	100.248	-318.564	126.98	-278.02	124.307	-271	175.5	-269.158	209.938	-265.721	274.202	-283.812	104.703	-317	59.5	-344.851	28.5149	-383.077	-14.0111	-241.634	99.945	-319.558	128.226	-277.767	124.693	-270.756	175.34	-269.199	210.692	-266.271	273.975	-284.416	105.086	-317.896	59.3105	-344.536	27.2578	-380.959	-16.6661	-28.3127	11.7108	-37.4433	15.0245	-32.5465	14.6105	-31.725
		47	-241.485	99.3564	-318.564	128.317	-276.683	124.307	-270.5	173.5	-270.281	211.622	-269.931	272.342	-283.366	104.703	-318	60	-345.743	28.5149	-383.346	-14.1614	-240.254	99.5792	-318.38	127.681	-276.738	124.47	-270.607	174.863	-270.251	210.518	-269.546	273.57	-283.41	104.69	-317.537	59.8459	-345.598	28.0034	-382.822	-14.294	-28.151	11.6679	-37.3052	14.9606	-32.4259	14.5844	-31.7076
		48	-238.366	99.3564	-317.673	126.98	-275.792	123.861	-270	174.5	-271.403	211.622	-273.734	273.273	-282.475	103.812	-317	60	-346.188	28.9604	-384.712	-12.0074	-238.72	99.2079	-317.082	127.22	-275.734	124.324	-270.432	174.557	-271.293	210.33	-272.833	273.264	-282.466	104.328	-317.258	60.1977	-346.604	28.5333	-384.434	-12.3139	-27.9714	11.6244	-37.1531	14.9066	-32.3084	14.5673	-31.6871
		49	-237.03	98.4653	-316.337	126.535	-274.455	125.198	-270	173	-272.526	208.254	-277.064	271.591	-282.03	104.703	-316	61	-347.97	28.5149	-385.332	-9.44881	-237.112	98.8866	-315.632	126.818	-274.759	124.181	-270.294	174.468	-272.269	210.135	-275.814	273.098	-281.491	104.008	-317.009	60.4366	-347.488	28.9478	-385.771	-10.6275	-27.7829	11.5867	-36.9832	14.8596	-32.1941	14.5505	-31.6709
		50	-234.802	98.4653	-313.218	126.535	-273.564	124.307	-271	176.5	-273.087	209.938	-277.158	275.151	-280.248	103.366	-317.5	60	-347.97	29.8515	-387.763	-9.52078	-235.57	98.6551	-314.125	126.467	-273.805	123.917	-270.171	174.449	-273.145	210.164	-278.385	272.939	-280.411	103.689	-316.714	60.64	-348.158	29.4415	-386.886	-9.03732	-27.6022	11.5596	-36.8067	14.8184	-32.0823	14.5196	-31.6565
		51	-234.356	98.9109	-312.327	126.98	-273.119	122.97	-269.5	174.5	-274.21	210.499	-282.323	272.508	-278.911	103.366	-317	61	-348.861	29.4059	-387.187	-8.59771	-234.167	98.4948	-312.747	126.101	-272.818	123.557	-270.015	174.237	-273.93	210.398	-280.602	272.536	-279.222	103.402	-316.162	60.9338	-348.566	30.1695	-387.803	-7.18503	-27.4378	11.5408	-36.6451	14.7755	-31.9666	14.4775	-31.6382
		52	-233.02	98.0198	-312.327	125.644	-272.228	122.97	-269.5	173.5	-274.21	211.06	-281.798	271.575	-278.911	102.921	-316	60.5	-347.97	30.297	-387.851	-7.3786	-232.868	98.3595	-311.558	125.686	-271.708	123.198	-269.87	173.817	-274.642	210.722	-282.45	271.902	-277.907	103.154	-315.249	61.3745	-348.663	31.3028	-388.631	-4.78998	-27.2856	11.525	-36.5059	14.7269	-31.8365	14.4353	-31.6212
		53	-231.683	98.4653	-308.762	124.307	-270.891	122.97	-270	173.5	-275.894	210.499	-285.55	271.113	-276.238	102.921	-313.5	62	-350.198	32.5248	-390.564	0.103592	-231.644	98.2441	-310.558	125.316	-270.437	122.855	-269.719	173.277	-275.321	211.042	-284.098	271.112	-276.432	102.925	-314.046	61.974	-348.415	32.8813	-389.397	-1.88472	-27.1421	11.5115	-36.3887	14.6835	-31.6877	14.3952	-31.6035
		54	-229.901	98.0198	-310.099	124.752	-268.218	122.525	-270	172.5	-274.771	211.06	-282.138	270.595	-275.347	102.921	-313	63	-347.525	35.198	-389.985	1.00569	-230.504	98.1187	-309.77	125.077	-269.085	122.497	-269.48	172.678	-275.996	211.297	-285.785	270.19	-274.884	102.66	-312.74	62.6161	-347.762	34.7537	-390.036	1.14911	-27.0086	11.4968	-36.2964	14.6556	-31.5293	14.3532	-31.5755
		55	-229.455	97.5743	-309.653	125.644	-268.218	122.525	-269	172	-278.139	211.622	-291.216	268.314	-272.673	102.921	-310.5	63.5	-345.743	38.3168	-390.921	6.03353	-229.411	97.9638	-309.02	124.881	-267.731	122.102	-269.144	172.084	-276.642	211.338	-287.59	269.183	-273.403	102.317	-311.49	63.1934	-346.856	36.7237	-390.615	4.10861	-26.8806	11.4786	-36.2085	14.6325	-31.3706	14.3069	-31.5362
		56	-229.455	98.9109	-308.762	124.752	-266.436	122.079	-268.5	171	-277.017	212.183	-288.517	267.795	-271.337	101.584	-310.5	64.5	-345.743	37.4257	-388.884	4.28367	-228.3	97.7483	-308.107	124.609	-266.439	121.669	-268.738	171.556	-277.247	210.996	-289.575	268.132	-272.117	101.891	-310.415	63.6312	-345.859	38.6631	-391.256	6.92381	-26.7504	11.4534	-36.1015	14.6007	-31.2192	14.2562	-31.4885
		57	-225.891	97.1287	-306.535	124.307	-264.208	120.297	-268.5	171.5	-277.017	210.499	-289.588	268.067	-271.337	101.139	-309	63.5	-346.634	39.6535	-392.493	10.5949	-227.093	97.4176	-306.979	124.229	-265.264	121.275	-268.307	171.104	-277.884	210.161	-291.938	266.979	-271.07	101.477	-309.52	63.967	-344.746	40.6714	-392.029	9.6931	-26.609	11.4146	-35.9693	14.5562	-31.0815	14.21	-31.438
		58	-226.337	96.2376	-305.644	123.416	-264.653	120.743	-268	171	-279.262	209.376	-295.833	265.844	-269.554	100.693	-309.5	63	-343.069	43.6634	-395.15	13.6637	-225.848	97.0611	-305.678	123.765	-264.249	121.036	-267.858	170.676	-278.637	208.919	-294.823	265.619	-270.168	101.131	-308.763	64.3516	-343.507	42.684	-392.697	12.2387	-26.4631	11.3728	-35.817	14.5018	-30.9626	14.182	-31.3854
		59	-225	97.1287	-304.307	123.416	-263.317	121.188	-267.5	170	-279.262	206.57	-297.764	264.096	-270.891	101.584	-307.5	66	-340.842	45.4455	-391.64	14.1296	-224.509	96.739	-304.207	123.241	-263.302	120.932	-267.42	170.263	-279.478	207.465	-298.036	264.099	-269.304	100.836	-308.057	64.8513	-342.382	44.4807	-393.09	14.469	-26.3062	11.3351	-35.6446	14.4404	-30.8516	14.1699	-31.3342
		60	-222.772	96.6832	-303.416	122.97	-262.871	121.188	-266	169.5	-279.823	204.886	-301.966	261.568	-267.772	100.248	-308	65	-340.842	46.3366	-393.936	16.1638	-223.067	96.3933	-302.539	122.64	-262.346	120.871	-267.068	169.917	-280.437	206.052	-301.428	262.549	-268.359	100.527	-307.377	65.3668	-341.571	45.9757	-393.347	16.5212	-26.1372	11.2946	-35.4491	14.37	-30.7396	14.1628	-31.2929
		61	-221.436	95.7921	-299.851	121.634	-261.089	120.743	-267.5	170	-282.069	205.447	-305.075	261.423	-267.327	100.248	-306.5	66	-342.178	46.3366	-393.067	18.2904	-221.576	96.0164	-300.732	121.984	-261.361	120.814	-266.804	169.627	-281.486	204.725	-304.891	261.027	-267.37	100.209	-306.691	65.8853	-340.976	47.2873	-393.538	18.506	-25.9626	11.2504	-35.2374	14.2931	-30.6243	14.156	-31.2619
[truncated: 198 more columns]

## Sheet: C0073
			RAW COORDINATES																				SPLINE																				mm
			HEAD		TAIL		LEFT COXAE		LEFT FT		LEFT TT		LEFT TIP		RIGHT COXAE		RIGHT FT		RIGHT TT		RIGHT TIP		HEAD		TAIL		LEFT COXAE		LEFT FT		LEFT TT		LEFT TIP		RIGHT COXAE		RIGHT FT		RIGHT TT		RIGHT TIP		HEAD		TAIL		LEFT COXAE		LEFT FT
SCALE		Frame	X	Y	X	Y	X	Y	X	Y	X	Y	X	Y	X	Y	X	Y	X	Y	X	Y	X	Y	X	Y	X	Y	X	Y	X	Y	X	Y	X	Y	X	Y	X	Y	X	Y	X	Y	X	Y	X	Y	X
X	Y	-2	627.505	-285.93	601.151	-354.704	603.25	-315.25	572.789	-277.76	546.125	-247.125	507.896	-203.203	625.467	-324.5	681.083	-312.5	729.496	-304.713	778.672	-296.803	627.481	-286.002	601.161	-354.777	603.278	-315.273	572.941	-277.595	546.328	-246.888	508.214	-202.899	625.496	-324.467	681.118	-312.216	729.546	-304.574	778.751	-296.815	73.5232	-33.5115	70.4392	-41.57	70.6873	-36.9411	67.1327
512.018	121.257	-1	627.505	-285.93	601.151	-354.704	603.25	-315.25	572.789	-277.76	546.125	-247.125	507.896	-203.203	625.467	-324.5	681.083	-312.5	729.496	-304.713	778.672	-296.803	627.481	-286.002	601.161	-354.777	603.278	-315.273	572.941	-277.595	546.328	-246.888	508.214	-202.899	625.496	-324.467	681.118	-312.216	729.546	-304.574	778.751	-296.815	73.5232	-33.5115	70.4392	-41.57	70.6873	-36.9411	67.1327
510.827	35.9206	0	627.505	-285.93	601.151	-354.704	603.25	-315.25	572.789	-277.76	546.125	-247.125	507.896	-203.203	625.467	-324.5	681.083	-312.5	729.496	-304.713	778.672	-296.803	627.481	-286.002	601.161	-354.777	603.278	-315.273	572.941	-277.595	546.328	-246.888	508.214	-202.899	625.496	-324.467	681.118	-312.216	729.546	-304.574	778.751	-296.815	73.5232	-33.5115	70.4392	-41.57	70.6873	-36.9411	67.1327
		1	627.505	-285.93	601.151	-354.704	603.25	-315.25	572.789	-277.76	546.125	-247.125	507.896	-203.203	625.467	-324.5	681.083	-312.5	729.496	-304.713	778.672	-296.803	627.481	-286.002	601.161	-354.777	603.278	-315.273	572.941	-277.595	546.328	-246.888	508.214	-202.899	625.496	-324.467	681.118	-312.216	729.546	-304.574	778.751	-296.815	73.5232	-33.5115	70.4392	-41.57	70.6873	-36.9411	67.1327
DISTANCE (mm)		2	627.505	-285.93	601.151	-354.704	603.25	-315.25	572.509	-277.62	546.125	-247.375	507.532	-203.135	625.578	-324.389	681.167	-312.5	729.694	-304.911	778.823	-297.229	627.491	-285.916	601.054	-354.632	603.228	-315.216	572.359	-277.612	546.035	-247.173	507.714	-202.84	625.54	-324.447	681.239	-312.607	729.637	-304.652	778.77	-296.58	73.5244	-33.5013	70.4268	-41.553	70.6814	-36.9345	67.0645
pixel	mm	3	627.505	-285.825	600.836	-354.599	603.167	-315.167	571.667	-277.62	545.75	-247.5	507.197	-202.695	625.578	-324.277	681.25	-313.167	729.595	-305.011	778.716	-296.723	627.511	-285.805	600.95	-354.467	603.169	-315.154	571.734	-277.685	545.678	-247.55	507.096	-202.901	625.577	-324.435	681.345	-313.089	729.714	-304.791	778.765	-296.378	73.5267	-33.4884	70.4145	-41.5336	70.6746	-36.9272	66.9912
85.3446	10	4	627.505	-285.825	600.93	-354.097	603.167	-315.167	570.875	-277.875	545.25	-247.625	506.986	-202.455	625.625	-324.5	681.25	-313.667	729.595	-305.011	778.546	-296.246	627.551	-285.652	600.865	-354.283	603.099	-315.088	571.051	-277.87	545.216	-248.156	506.205	-203.259	625.606	-324.416	681.397	-313.733	729.769	-305.127	778.722	-296.408	73.5315	-33.4704	70.4046	-41.5121	70.6664	-36.9195	66.9113
1	0.117172	5	627.61	-285.3	600.841	-354.009	603	-314.833	570.685	-278.181	544.625	-249.25	504.532	-204.739	625.625	-324.375	681.333	-314.333	729.595	-305.507	778.564	-296.551	627.623	-285.451	600.8	-354.108	603.019	-315.032	570.283	-278.208	544.634	-249.095	504.942	-204.012	625.633	-324.343	681.323	-314.618	729.76	-305.851	778.607	-296.977	73.5398	-33.4468	70.397	-41.4916	70.6569	-36.9129	66.8212
		6	627.715	-285.195	600.753	-354.009	603	-314.917	569.5	-278.375	544	-250.125	503.27	-205.002	625.75	-324.25	681.5	-315.5	729.694	-306.995	778.839	-298.322	627.722	-285.23	600.766	-353.928	602.942	-315.004	569.377	-278.735	543.926	-250.36	503.37	-205.109	625.666	-324.178	681.013	-315.797	729.59	-307.121	778.344	-298.351	73.5514	-33.421	70.393	-41.4705	70.648	-36.9096	66.715
LENGTH (mm)		7	627.925	-284.775	600.665	-353.744	602.75	-314.917	568.375	-279.5	543	-252.25	501.015	-207.163	625.875	-323.875	680.833	-317.167	729.396	-308.582	778.168	-299.961	627.841	-284.991	600.788	-353.701	602.889	-314.978	568.37	-279.463	543.092	-251.931	501.498	-206.609	625.718	-323.901	680.378	-317.236	729.119	-309.004	777.863	-300.686	73.5654	-33.393	70.3956	-41.4438	70.6417	-36.9066	66.5971
Body	9.84821	8	627.925	-284.88	600.93	-353.39	602.917	-315	567.125	-280.625	542.375	-253.75	500.166	-207.917	625.625	-323.625	679.5	-318.833	728.603	-310.765	777.035	-302.807	627.974	-284.707	600.881	-353.399	602.88	-314.893	567.353	-280.32	542.143	-253.765	499.261	-208.621	625.828	-323.508	679.466	-318.814	728.239	-311.493	777.221	-304.068	73.581	-33.3598	70.4065	-41.4085	70.6407	-36.8967	66.4779
R. Femur	6.69879	9	628.03	-284.565	601.018	-353.037	602.917	-314.667	566.375	-281.25	541	-255.5	496.997	-210.846	626	-323.125	678.071	-320.859	726.916	-315.131	776.241	-309.346	628.131	-284.31	601.035	-353.009	602.911	-314.676	566.407	-281.241	541.083	-255.876	496.528	-211.334	626.067	-323.001	678.46	-320.379	726.929	-314.437	776.563	-308.343	73.5994	-33.3132	70.4245	-41.3628	70.6443	-36.8713	66.3671
R. Tibia	5.15833	10	628.45	-283.62	601.283	-352.418	602.917	-314.417	565.75	-282	539.875	-258.125	493.106	-214.971	626.125	-322.375	677.229	-321.701	725.328	-318.008	775.782	-314.135	628.312	-283.772	601.243	-352.521	602.98	-314.273	565.565	-282.234	539.964	-258.272	493.375	-214.779	626.46	-322.412	677.551	-321.806	725.269	-317.535	775.992	-313.087	73.6206	-33.2502	70.4488	-41.3056	70.6524	-36.8241	66.2684
R. Tarsus	2.13786	11	628.555	-283.2	601.46	-351.887	603.083	-313.75	564.625	-283.375	539	-261	490.17	-218.363	627.125	-321.25	676.668	-323.198	723.642	-320.588	775.359	-317.715	628.497	-283.126	601.499	-351.922	603.083	-313.644	564.846	-283.309	538.824	-260.867	490.021	-218.848	626.991	-321.809	676.828	-323.074	723.358	-320.63	775.514	-318.092	73.6423	-33.1744	70.4788	-41.2355	70.6644	-36.7503	66.1841
L. Femur	6.28158	12	628.765	-282.255	601.725	-351.269	603.25	-312.833	564.125	-284.375	537.75	-263.75	486.262	-223.487	627.75	-321.25	676.106	-324.32	721.26	-323.565	774.936	-322.666	628.695	-282.388	601.804	-351.178	603.201	-312.784	564.298	-284.432	537.685	-263.525	486.659	-223.423	627.57	-321.223	676.275	-324.174	721.325	-323.71	775.061	-323.424	73.6655	-33.088	70.5146	-41.1482	70.6783	-36.6495	66.12
L. Tibia	5.00487	13	628.87	-281.415	602.167	-350.385	603.333	-311.75	564	-285.625	536.75	-266.25	483.443	-228.348	628.125	-320.875	676.106	-324.788	719.078	-326.541	774.868	-328.817	628.941	-281.576	602.146	-350.243	603.318	-311.725	563.921	-285.564	536.611	-266.148	483.477	-228.286	628.126	-320.561	675.81	-325.128	719.363	-326.771	774.507	-329.081	73.6944	-32.9928	70.5547	-41.0387	70.692	-36.5255	66.0758
L. Tarsus	1.65061	14	629.185	-280.785	602.609	-349.059	603.5	-310.25	563.75	-286.625	535.375	-268.5	480.45	-233.416	628.625	-319.75	675.358	-326.004	717.292	-330.113	773.73	-335.643	629.285	-280.672	602.498	-349.102	603.426	-310.52	563.665	-286.663	535.697	-268.7	480.581	-233.213	628.64	-319.719	675.323	-325.977	717.651	-329.76	773.714	-334.85	73.7346	-32.8869	70.5959	-40.905	70.7047	-36.3843	66.0458
		15	629.71	-279.63	602.786	-347.733	603.583	-309.25	563.375	-287.625	534.75	-271.125	477.74	-238.263	629.125	-318.75	675.077	-326.659	715.704	-332.593	772.883	-340.946	629.759	-279.62	602.836	-347.77	603.53	-309.212	563.494	-287.691	535.055	-271.171	478.036	-238.009	629.102	-318.669	674.762	-326.695	716.278	-332.586	772.617	-340.46	73.7901	-32.7636	70.6355	-40.749	70.7168	-36.231	66.0257
mg	15.6	16	630.34	-278.475	603.228	-346.407	603.667	-307.583	563.5	-288.625	534.625	-273.625	475.786	-243.059	629.75	-317.5	674.142	-327.594	715.109	-335.074	771.378	-345.348	630.363	-278.382	603.16	-346.263	603.654	-307.786	563.39	-288.607	534.713	-273.507	475.862	-242.541	629.497	-317.414	674.117	-327.242	715.204	-335.223	771.191	-345.834	73.861	-32.6186	70.6735	-40.5724	70.7314	-36.0639	66.0135
		17	631.18	-277.005	603.582	-344.551	603.667	-306.583	563.375	-289.5	534.5	-276.125	473.686	-247.956	630	-315.875	673.581	-327.594	714.514	-337.852	769.459	-351.622	631.084	-276.934	603.471	-344.591	603.841	-306.211	563.317	-289.348	534.609	-275.64	473.998	-246.778	629.831	-315.978	673.456	-327.591	714.23	-337.659	769.484	-351.024	73.9454	-32.4489	70.71	-40.3765	70.7533	-35.8794	66.005
		18	631.915	-275.22	603.758	-342.518	603.917	-304.583	563.375	-290.125	534.875	-277.5	473.002	-250.091	630.125	-314.125	672.458	-327.688	713.422	-339.836	767.222	-355.792	631.901	-275.278	603.788	-342.793	604.13	-304.432	563.263	-289.865	534.636	-277.556	472.332	-250.887	630.179	-314.408	672.876	-327.793	713.121	-339.86	767.599	-356.03	74.0412	-32.2549	70.7471	-40.1658	70.7871	-35.6709	65.9986
		19	632.755	-273.225	604.024	-340.838	604.833	-302.167	563.25	-290.125	534.875	-278.875	471.365	-253.695	630.375	-313.125	672.147	-327.633	712.232	-341.722	765.398	-360.409	632.819	-273.435	604.156	-340.893	604.506	-302.475	563.24	-290.156	534.67	-279.351	470.712	-255.288	630.665	-312.713	672.481	-327.913	711.718	-341.826	765.623	-360.95	74.1487	-32.0389	70.7902	-39.9431	70.8312	-35.4416	65.996
		20	633.805	-271.755	604.731	-338.893	605.083	-300.417	563.25	-290.25	534.75	-281.5	468.76	-261.24	631	-310.875	672.147	-327.93	710.148	-343.706	763.436	-365.828	633.845	-271.403	604.614	-338.843	604.917	-300.405	563.291	-290.286	534.648	-281.111	469.161	-260.195	631.395	-310.857	672.267	-327.978	709.974	-343.556	763.543	-365.828	74.2689	-31.8009	70.8439	-39.7029	70.8794	-35.1991	66.002
		21	634.96	-269.13	605.083	-336.917	605.25	-298.5	563.5	-290.25	534.875	-282.875	467.782	-265.589	632.375	-308.625	672.645	-328.436	707.866	-344.897	762.192	-370.286	634.97	-269.152	605.174	-336.573	605.382	-298.226	563.465	-290.326	534.572	-282.833	467.866	-265.474	632.38	-308.881	672.123	-327.941	707.988	-345.035	761.268	-370.574	74.4008	-31.5371	70.9094	-39.437	70.9339	-34.9438	66.0223
		22	636.325	-266.716	605.667	-334.167	605.75	-295.917	563.671	-290.272	534.625	-284.125	466.97	-269.808	633.625	-306.75	672.084	-327.594	705.187	-346.286	758.154	-376.194	636.175	-266.716	605.862	-334.041	605.97	-295.943	563.803	-290.332	534.496	-284.578	466.952	-271.145	633.529	-306.84	671.922	-327.755	705.92	-346.266	758.722	-375.049	74.5419	-31.2516	70.9901	-39.1402	71.0027	-34.6763	66.0619
		23	637.375	-264.091	606.667	-331.25	606.833	-293.25	564.139	-290.272	534.375	-286.25	466.186	-277.036	635	-304.75	671.429	-327.407	703.798	-347.278	755.666	-379.119	637.44	-264.146	606.68	-331.29	606.714	-293.622	564.344	-290.34	534.559	-286.41	466.507	-277.239	634.728	-304.726	671.658	-327.477	703.872	-347.231	756	-379.113	74.6902	-30.9505	71.086	-38.8179	71.0899	-34.4043	66.1254
		24	638.845	-261.466	607.75	-328.333	607.667	-291.25	565.262	-290.272	534.375	-288.5	466.581	-284.611	635.875	-302.875	671.336	-326.939	701.814	-347.873	752.811	-382.901	638.78	-261.489	607.58	-328.413	607.599	-291.318	565.09	-290.36	534.932	-288.287	466.597	-283.475	635.905	-302.498	671.38	-327.149	701.766	-347.91	753.102	-382.873	74.8472	-30.6392	71.1913	-38.4808	71.1937	-34.1344	66.2128
		25	640	-258.631	608.5	-325.25	608.25	-289.167	566.01	-290.272	535.5	-289.875	467.175	-288.986	637.125	-300.25	670.962	-326.659	699.928	-348.27	750.185	-385.766	640.204	-258.775	608.507	-325.493	608.629	-288.995	565.996	-290.382	535.723	-290.114	467.217	-289.515	637.049	-300.137	671.091	-326.778	699.469	-348.295	749.905	-386.503	75.014	-30.3213	71.3	-38.1387	71.3143	-33.8622	66.3189
		26	641.68	-256.111	609.5	-322.333	610.083	-286.583	567.319	-290.365	537.5	-292.125	468.648	-296.188	638.125	-297.625	670.868	-326.472	697.15	-348.27	746.949	-389.573	641.72	-256.022	609.447	-322.582	609.806	-286.591	567.046	-290.363	536.887	-291.825	468.338	-295.239	638.166	-297.715	670.764	-326.311	696.881	-348.369	746.215	-390.142	75.1917	-29.9987	71.4101	-37.7976	71.4522	-33.5805	66.4419
		27	643.36	-253.171	610.417	-320	610.667	-284.167	568.161	-290.178	538.17	-293.194	469.814	-300.066	639.25	-295	670.494	-325.723	693.975	-348.171	741.942	-394.026	643.295	-253.215	610.394	-319.655	611.066	-284.078	568.252	-290.23	538.335	-293.324	469.935	-300.525	639.273	-295.351	670.343	-325.664	694.024	-348.102	741.926	-393.729	75.3762	-29.6698	71.5211	-37.4546	71.5999	-33.286	66.5833
		28	644.935	-250.336	611.333	-316.833	612.75	-281.583	569.658	-290.085	539.761	-294.608	471.927	-304.871	640.625	-292.75	669.746	-324.788	690.899	-347.377	737.309	-396.935	644.874	-250.35	611.357	-316.637	612.366	-281.44	569.686	-289.904	540.091	-294.566	472.047	-305.412	640.38	-293.125	669.801	-324.789	691.005	-347.444	737.118	-397.051	75.5612	-29.334	71.634	-37.101	71.7522	-32.9769	66.7513
		29	646.51	-247.501	612.417	-313.333	613.75	-278.667	570.968	-289.43	542.059	-295.669	474.349	-310.281	641.125	-291.125	669.184	-323.572	687.724	-346.484	731.36	-400.411	646.422	-247.416	612.353	-313.531	613.607	-278.691	571.41	-289.302	542.162	-295.495	474.697	-309.854	641.506	-291.013	669.146	-323.66	687.93	-346.353	731.926	-399.922	75.7426	-28.9903	71.7506	-36.7371	71.8976	-32.6548	66.9533
		30	647.98	-244.351	613.333	-310.417	614.833	-275.75	573.493	-288.214	544.711	-296.199	478.247	-314.638	642.75	-289.125	668.436	-322.356	685.542	-345.393	727.362	-401.714	647.924	-244.402	613.394	-310.39	614.765	-275.881	573.452	-288.386	544.462	-296.068	477.85	-313.685	642.701	-288.893	668.384	-322.246	684.864	-344.781	726.498	-402.173	75.9186	-28.6371	71.8726	-36.3691	72.0333	-32.3255	67.1925
		31	649.167	-241.333	614.583	-307.167	615.917	-273	575.531	-287.295	547.009	-296.287	481.262	-317.016	643.875	-287	667.781	-320.485	681.275	-342.714	719.073	-404.979	649.394	-241.313	614.506	-307.237	615.873	-273.053	575.738	-287.15	546.877	-296.288	481.412	-316.856	643.944	-286.659	667.531	-320.507	681.86	-342.741	720.913	-403.716	76.0908	-28.2751	72.0029	-35.9996	72.1631	-31.9942	67.4604
		32	650.833	-238.25	615.667	-304.083	616.917	-270.25	577.946	-285.93	549.219	-296.022	484.69	-318.692	645.5	-284.375	666.846	-318.708	679.092	-340.035	716.066	-404.425	650.848	-238.145	615.708	-304.084	616.991	-270.218	578.168	-285.564	549.351	-296.202	485.348	-319.569	645.202	-284.282	666.631	-318.417	679.08	-340.392	715.308	-404.457	76.2612	-27.904	72.1437	-35.6302	72.2942	-31.6621	67.7451
		33	652.333	-235	616.833	-301.167	618.083	-267.417	580.676	-283.62	551.959	-295.757	489.63	-322.1	646.25	-281.375	665.536	-316.182	676.81	-337.951	710.992	-403.954	652.255	-234.907	617.03	-300.929	618.189	-267.37	580.583	-283.64	551.868	-295.851	489.576	-322.07	646.445	-281.833	665.798	-315.972	676.59	-337.901	709.496	-404.561	76.426	-27.5245	72.2987	-35.2605	72.4344	-31.3283	68.0282
		34	653.75	-231.417	618.5	-297.75	619.417	-264.333	583.196	-281.73	554.611	-295.315	493.922	-324.158	647.625	-279	664.788	-313.376	674.131	-335.272	703.581	-404.289	653.57	-231.633	618.487	-297.78	619.514	-264.507	582.769	-281.482	554.39	-295.231	493.856	-324.412	647.694	-279.395	665.198	-313.243	674.441	-335.354	703.441	-404.223	76.5801	-27.1409	72.4694	-34.8915	72.5897	-30.9929	68.2843
		35	654.75	-228.25	620.076	-294.294	620.833	-261.833	585.296	-278.79	556.821	-294.431	498.662	-326.377	649	-277.25	664.788	-309.822	672.445	-332.593	696.289	-403.511	654.776	-228.376	620.047	-294.695	620.981	-261.632	584.543	-279.225	556.908	-294.312	497.929	-326.592	648.942	-276.928	664.922	-310.371	672.717	-332.824	697.5	-403.503	76.7215	-26.7593	72.6522	-34.5301	72.7616	-30.656	68.4921
		36	655.917	-225.25	621.667	-291.833	622.5	-258.833	585.821	-276.69	559.296	-293.459	502.273	-329.508	650.333	-274.833	664.882	-307.483	671.155	-330.311	691.073	-402.793	655.902	-225.136	621.672	-291.72	622.57	-258.722	585.867	-277.033	559.463	-293.083	501.595	-328.54	650.155	-274.299	664.949	-307.512	671.425	-330.355	692.079	-402.441	76.8534	-26.3796	72.8426	-34.1814	72.9478	-30.3149	68.6472
		37	656.917	-222	623.417	-288.833	624.583	-255.5	586.661	-274.905	562.036	-291.514	504.715	-330.176	651.25	-271.5	665.162	-304.583	670.46	-328.029	686.948	-400.996	656.98	-221.879	623.33	-288.809	624.214	-255.794	586.897	-274.968	562.081	-291.587	504.863	-330.175	651.321	-271.45	665.197	-304.701	670.481	-327.934	687.257	-401.103	76.9797	-25.998	73.0368	-33.8404	73.1405	-29.9719	68.7679
		38	658	-218.5	625	-286	625.75	-253	587.501	-273.225	564.865	-289.569	507.364	-331.088	652.417	-268.083	665.911	-302.058	670.262	-325.549	683.913	-399.248	658.04	-218.595	624.995	-285.926	625.847	-252.888	587.809	-272.982	564.739	-289.955	507.929	-331.626	652.466	-268.472	665.563	-301.927	669.72	-325.525	682.798	-399.628	77.1039	-25.6133	73.2319	-33.5025	73.3317	-29.6313	68.8747
[truncated: 198 more columns]

[truncated: 2 more sheets: C0083, C0084]
