# Supplementary material for: Distinct kinematics and micromorphology for symmetrical rowing and sliding on water in ripple bugs and water striders
Source: Sci Rep. 2025 Dec 29;15:44777. doi: 10.1038/s41598-025-28453-0 (PMC12749290; doi:10.1038/s41598-025-28453-0)
Supplement: Supplementary file 2 — Supplementary Material 2 [file 41598_2025_28453_MOESM2_ESM.xlsx]

## Sheet: C0001
			RAW COORDINATES																				SPLINE																				mm
			HEAD		TAIL		LEFT COXAE		LEFT FT		LEFT TT		LEFT TIP		RIGHT COXAE		RIGHT FT		RIGHT TT		RIGHT TIP		HEAD		TAIL		LEFT COXAE		LEFT FT		LEFT TT		LEFT TIP		RIGHT COXAE		RIGHT FT		RIGHT TT		RIGHT TIP		HEAD		TAIL		LEFT COXAE		LEFT FT
SCALE		Frame	X	Y	X	Y	X	Y	X	Y	X	Y	X	Y	X	Y	X	Y	X	Y	X	Y	X	Y	X	Y	X	Y	X	Y	X	Y	X	Y	X	Y	X	Y	X	Y	X	Y	X	Y	X	Y	X	Y	X
X	Y	-2	-695.769	-18.5239	-850.99	66.3861	-730.572	29.7505	-652	26.5	-599.5	51	-546	70	-754	-19	-711.665	-75.6119	-718.015	-135.546	-719.206	-190.32	-695.975	-18.8669	-850.956	66.3513	-731.268	29.7042	-651.407	26.0258	-600.647	50.7233	-545.559	70.11	-754.492	-18.9703	-711.326	-75.2189	-718.014	-135.432	-719.148	-190.559	-22.4695	-0.609117	-27.4731	2.14215	-23.609	0.958999	-21.0306
-376.181	421.436	-1	-695.769	-18.5239	-850.99	66.3861	-730.572	29.7505	-652	26.5	-599.5	51	-546	70	-754	-19	-711.665	-75.6119	-718.015	-135.546	-719.206	-190.32	-695.975	-18.8669	-850.956	66.3513	-731.268	29.7042	-651.407	26.0258	-600.647	50.7233	-545.559	70.11	-754.492	-18.9703	-711.326	-75.2189	-718.014	-135.432	-719.148	-190.559	-22.4695	-0.609117	-27.4731	2.14215	-23.609	0.958999	-21.0306
-66.468	425.678	0	-695.769	-18.5239	-850.99	66.3861	-730.572	29.7505	-652	26.5	-599.5	51	-546	70	-754	-19	-711.665	-75.6119	-718.015	-135.546	-719.206	-190.32	-695.975	-18.8669	-850.956	66.3513	-731.268	29.7042	-651.407	26.0258	-600.647	50.7233	-545.559	70.11	-754.492	-18.9703	-711.326	-75.2189	-718.014	-135.432	-719.148	-190.559	-22.4695	-0.609117	-27.4731	2.14215	-23.609	0.958999	-21.0306
		1	-695.769	-18.5239	-850.99	66.3861	-730.572	29.7505	-652	26.5	-599.5	51	-546	70	-754	-19	-711.665	-75.6119	-718.015	-135.546	-719.206	-190.32	-695.975	-18.8669	-850.956	66.3513	-731.268	29.7042	-651.407	26.0258	-600.647	50.7233	-545.559	70.11	-754.492	-18.9703	-711.326	-75.2189	-718.014	-135.432	-719.148	-190.559	-22.4695	-0.609117	-27.4731	2.14215	-23.609	0.958999	-21.0306
DISTANCE (mm)		2	-695.208	-19.0852	-849.208	67.2772	-731.133	29.7505	-650	26	-601.5	52	-544.5	72	-755	-19	-712.062	-75.6119	-720	-135.546	-722.381	-191.114	-695.186	-19.0936	-849.477	67.0385	-730.543	29.9313	-651.019	26.9954	-600.518	52.1689	-544.909	71.7152	-754.002	-18.714	-711.906	-75.8743	-720.433	-135.736	-722.705	-191.017	-22.4441	-0.616435	-27.4253	2.16434	-23.5855	0.966331	-21.0181
pixel	mm	3	-694.647	-20.2079	-848.317	67.7228	-730.01	30.3119	-650.5	28.5	-600.5	53.5	-544.5	73.5	-753	-18	-711.665	-76.0088	-723.175	-135.943	-726.351	-191.907	-694.343	-19.2271	-847.995	67.746	-729.656	30.1628	-650.746	28.0485	-600.123	53.6817	-544.36	73.3034	-753.424	-18.4786	-712.585	-76.6241	-722.833	-136.063	-726.263	-191.415	-22.4168	-0.620748	-27.3775	2.18717	-23.5569	0.973804	-21.0093
309.742	10	4	-693.524	-19.0852	-846.535	67.7228	-728.888	30.3119	-651	29	-600	55.5	-543.5	75	-752.5	-18.5	-712.856	-77.9934	-725.954	-136.736	-730.32	-191.114	-693.407	-19.2171	-846.474	68.5357	-728.568	30.3772	-650.507	29.1092	-599.389	55.2903	-543.945	74.9181	-752.832	-18.3151	-713.449	-77.4877	-725.132	-136.394	-729.769	-191.732	-22.3866	-0.620424	-27.3284	2.21267	-23.5218	0.980725	-21.0016
1	0.032285	5	-692.401	-19.0852	-845.198	69.505	-727.765	30.8732	-650	30.5	-598.5	56.5	-543.5	76.5	-752.5	-18	-716.031	-77.9934	-726.748	-136.736	-733.495	-192.701	-692.404	-19.1836	-844.925	69.4401	-727.344	30.5687	-650.153	30.1334	-598.386	56.9923	-543.686	76.6545	-752.25	-18.2092	-714.395	-78.3847	-727.328	-136.698	-733.197	-192.012	-22.3542	-0.619343	-27.2784	2.24187	-23.4823	0.98691	-20.9902
		6	-691.279	-19.0852	-842.97	70.396	-724.397	30.8732	-650	31.5	-596.5	59.5	-543.5	78.5	-752	-18	-714.443	-79.581	-729.526	-136.736	-735.877	-191.51	-691.392	-19.2627	-843.399	70.3463	-726.143	30.7404	-649.607	31.0941	-597.313	58.7929	-543.519	78.6244	-751.639	-18.1493	-715.25	-79.2803	-729.556	-137.001	-736.635	-192.242	-22.3216	-0.621896	-27.2291	2.27113	-23.4435	0.992452	-20.9725
LENGTH (mm)		7	-690.156	-18.5239	-842.079	71.7327	-724.397	30.3119	-649	31.5	-596	60.5	-544	81	-750.5	-18.5	-716.428	-79.9779	-731.51	-137.53	-740.243	-192.304	-690.429	-19.5587	-841.976	71.1193	-725.134	30.953	-648.804	32.0438	-596.381	60.6496	-543.329	80.91	-751.002	-18.0873	-716.07	-80.1055	-731.882	-137.339	-740.217	-192.472	-22.2905	-0.631451	-27.1831	2.29608	-23.4109	0.999317	-20.9466
Body	5.35005	8	-689.595	-20.2079	-840.297	71.7327	-725.52	31.4345	-647.5	33.5	-596	62.5	-543.5	83	-750.5	-18	-716.825	-81.5656	-734.289	-137.133	-743.815	-193.892	-689.54	-20.0929	-840.678	71.6632	-724.157	31.2763	-647.751	33.1002	-595.643	62.6187	-543.017	83.5682	-750.399	-17.9577	-716.856	-80.8223	-734.323	-137.711	-743.955	-192.643	-22.2618	-0.648698	-27.1413	2.31364	-23.3794	1.00975	-20.9126
R. Femur	2.37867	9	-688.472	-21.3306	-839.406	72.1782	-722.713	31.9958	-647	34	-594.5	64.5	-542	86.5	-749.5	-18.5	-717.619	-81.9625	-737.464	-138.324	-748.181	-191.51	-688.7	-20.6973	-839.511	71.9984	-722.903	31.6774	-646.497	34.3192	-595.063	64.7558	-542.627	86.6409	-749.819	-17.7643	-717.635	-81.4166	-736.828	-138.112	-747.825	-192.69	-22.2347	-0.668211	-27.1036	2.32446	-23.3389	1.0227	-20.8721
R. Tibia	1.71571	10	-687.911	-21.3306	-838.515	72.1782	-723.836	31.4345	-645.5	35.5	-595	67	-542	90.5	-749.5	-16.5	-718.412	-80.7718	-739.052	-138.324	-751.356	-193.098	-687.869	-21.2064	-838.409	72.1932	-721.267	32.1374	-645.078	35.79	-594.627	67.077	-542.291	90.0651	-749.232	-17.5704	-718.445	-82.0271	-739.349	-138.452	-751.796	-192.71	-22.2078	-0.684648	-27.068	2.33075	-23.2861	1.03756	-20.8263
R. Tarsus	1.69337	11	-687.349	-21.3306	-837.178	71.7327	-717.661	32.5572	-643	37.5	-594.5	70	-542.5	93	-748.5	-18	-718.809	-82.7563	-741.433	-139.515	-756.119	-192.701	-686.964	-21.5847	-837.277	72.363	-719.316	32.6728	-643.639	37.55	-594.246	69.5346	-542.03	93.761	-748.57	-17.5166	-719.326	-82.8704	-741.95	-138.63	-755.868	-192.664	-22.1786	-0.696861	-27.0315	2.33623	-23.2231	1.05484	-20.7799
L. Femur	2.44159	12	-685.665	-22.4532	-836.733	72.1782	-715.977	33.6798	-641.5	38.5	-593.5	72	-542	97.5	-748	-17.5	-720.794	-83.5502	-745.006	-138.324	-760.088	-192.304	-685.945	-21.8168	-836.024	72.5525	-717.375	33.1731	-642.35	39.564	-593.904	72.1117	-541.838	97.6292	-747.789	-17.6416	-720.251	-83.9472	-744.607	-138.639	-760.009	-192.531	-22.1457	-0.704354	-26.991	2.34235	-23.1604	1.07099	-20.7382
L. Tibia	1.78342	13	-684.543	-21.8919	-834.059	73.0693	-716.538	34.2412	-641.5	43.5	-594	74.5	-542	103	-746.5	-17	-720.794	-85.1378	-747.784	-138.721	-764.057	-191.51	-684.788	-21.9044	-834.588	72.7466	-715.709	33.5116	-641.316	41.7325	-593.603	74.8139	-541.736	101.533	-746.862	-17.9623	-721.18	-85.1761	-747.265	-138.512	-764.19	-192.302	-22.1083	-0.707184	-26.9446	2.34862	-23.1066	1.08192	-20.7049
L. Tarsus	1.6947	14	-684.543	-21.3306	-833.614	73.5149	-713.732	33.6798	-640	43.5	-593.5	78	-540.5	105.5	-746.5	-19	-722.778	-87.1224	-749.768	-137.53	-768.82	-192.701	-683.452	-21.933	-832.999	72.8012	-714.168	33.6719	-640.421	43.8375	-593.318	77.6688	-541.844	105.286	-745.778	-18.4849	-722.091	-86.3891	-749.903	-138.339	-768.417	-191.895	-22.0652	-0.708107	-26.8933	2.35038	-23.0569	1.0871	-20.6759
		15	-681.736	-21.8919	-831.386	72.6238	-712.609	32.5572	-640	45.5	-592.5	80.5	-542	109	-744	-19.5	-722.381	-87.5193	-751.753	-138.721	-772.789	-192.304	-681.883	-21.9921	-831.254	72.6577	-712.702	33.7946	-639.535	45.9178	-593.081	80.6485	-542.265	108.985	-744.5	-19.0495	-722.959	-87.4281	-752.614	-138.183	-772.691	-191.11	-22.0146	-0.710014	-26.837	2.34575	-23.0096	1.09106	-20.6474
mg	14	16	-679.491	-22.4532	-829.158	71.7327	-711.486	34.2412	-639.5	48.5	-593.5	83.5	-544	111.5	-743.5	-19.5	-723.572	-88.71	-755.325	-137.53	-776.362	-189.129	-680.206	-22.0573	-829.44	72.3992	-711.215	33.9986	-638.485	48.0121	-592.949	83.764	-542.863	112.834	-743.085	-19.5664	-723.838	-88.27	-755.452	-137.993	-777.084	-189.913	-21.9604	-0.71212	-26.7784	2.33741	-22.9616	1.09764	-20.6135
		17	-678.368	-22.4532	-827.376	72.1782	-709.241	34.8025	-637	50	-592.5	87	-543.5	117.5	-741	-20	-725.16	-88.3131	-758.897	-137.927	-781.521	-188.335	-678.535	-22.0771	-827.686	72.1048	-709.587	34.1911	-637.206	50.0905	-592.909	87.0025	-543.442	116.986	-741.551	-20.0473	-724.697	-88.9607	-758.305	-137.759	-781.671	-188.483	-21.9065	-0.712757	-26.7218	2.3279	-22.909	1.10386	-20.5722
		18	-677.245	-21.8919	-825.594	71.7327	-709.241	33.6798	-636	51.5	-592.5	90.5	-544.5	121.5	-740.5	-21	-725.954	-89.9008	-761.279	-137.53	-786.284	-186.748	-676.841	-22.0835	-826.062	71.735	-707.725	34.2948	-635.827	52.1881	-593	90.2968	-544.002	121.38	-739.943	-20.5098	-725.453	-89.6006	-761.024	-137.417	-786.394	-186.907	-21.8518	-0.712964	-26.6694	2.31596	-22.8489	1.10721	-20.5277
		19	-675	-21.8919	-824.703	71.7327	-706.435	34.2412	-634	54	-593.5	93.5	-544.5	124.5	-737.5	-20	-725.557	-90.2977	-764.057	-137.133	-791.444	-185.16	-675.053	-22.1858	-824.547	71.2336	-705.557	34.326	-634.497	54.3147	-593.191	93.5764	-544.63	125.992	-738.25	-20.9823	-726.117	-90.2065	-763.575	-136.921	-791.133	-185.202	-21.7941	-0.716268	-26.6204	2.29977	-22.7789	1.10821	-20.4847
		20	-673.316	-22.4532	-823.366	69.9505	-701.383	34.8025	-633.5	57	-594.5	97	-545	132	-737	-22	-726.748	-91.0915	-765.248	-135.943	-797.001	-183.572	-673.161	-22.4624	-823.029	70.5697	-703.307	34.2136	-633.36	56.338	-593.355	96.8042	-545.496	130.776	-736.504	-21.5353	-726.785	-90.8243	-766.017	-136.26	-795.752	-183.35	-21.733	-0.725197	-26.5714	2.27834	-22.7062	1.10459	-20.448
		21	-671.071	-23.0146	-821.584	70.396	-699.699	34.2412	-631	59	-593	100	-546.5	135.5	-735	-22	-727.938	-90.2977	-768.026	-135.546	-798.986	-180.794	-671.17	-22.9295	-821.419	69.7745	-701.339	33.8704	-632.488	58.0674	-593.452	99.9469	-546.749	135.475	-734.646	-22.1049	-727.473	-91.542	-768.472	-135.453	-800.225	-181.325	-21.6687	-0.740279	-26.5195	2.25267	-22.6427	1.0935	-20.4199
		22	-668.825	-23.5759	-819.356	68.6139	-700.26	33.1185	-632.5	60	-593.5	102.5	-548.5	140	-732	-23.5	-727.144	-93.0761	-771.599	-134.355	-804.542	-179.206	-669.113	-23.5928	-819.71	68.8217	-699.624	33.3316	-631.876	59.4491	-593.643	103.016	-548.429	139.991	-732.707	-22.6459	-728.207	-92.4317	-770.915	-134.477	-804.711	-179.115	-21.6023	-0.761691	-26.4643	2.2219	-22.5873	1.07611	-20.4001
		23	-667.141	-23.5759	-818.02	67.7228	-699.699	31.9958	-631.5	59.5	-593.5	106.5	-550.5	145	-731	-23	-729.129	-93.0761	-773.583	-134.355	-809.305	-177.222	-666.978	-24.4706	-817.897	67.7443	-697.825	32.701	-631.33	60.694	-594.042	105.977	-550.517	144.283	-730.714	-23.2184	-728.967	-93.4306	-773.284	-133.298	-809.184	-176.634	-21.5334	-0.790033	-26.4058	2.18712	-22.5292	1.05575	-20.3825
		24	-664.896	-25.8212	-816.238	66.3861	-695.208	32.5572	-631.5	61.5	-595	109	-552	148	-729	-23	-730.32	-94.6637	-775.171	-131.18	-813.671	-174.443	-664.735	-25.544	-815.965	66.5886	-695.66	32.0525	-630.641	62.0384	-594.709	108.79	-552.987	148.344	-728.679	-23.9251	-729.689	-94.4472	-775.56	-131.923	-813.554	-173.802	-21.4609	-0.824688	-26.3434	2.14981	-22.4594	1.03481	-20.3602
		25	-662.651	-27.5052	-814.01	65.495	-692.401	31.4345	-629	63.5	-595.5	111.5	-557	152	-726	-24.5	-730.32	-95.4576	-777.155	-130.386	-817.641	-169.68	-662.355	-26.6429	-813.89	65.3624	-693.242	31.33	-629.743	63.5448	-595.602	111.455	-555.777	152.285	-726.593	-24.8905	-730.24	-95.4137	-777.842	-130.505	-817.737	-170.688	-21.3841	-0.860165	-26.2764	2.11022	-22.3813	1.01149	-20.3312
		26	-659.283	-28.0665	-811.337	64.1584	-691.279	30.8732	-629.5	65	-596.5	113	-559	156	-725	-26.5	-730.717	-96.6483	-779.934	-128.798	-822.007	-166.902	-659.867	-27.646	-811.716	64.0463	-690.635	30.5451	-628.689	65.1126	-596.705	114.044	-558.695	156.171	-724.506	-26.0287	-730.629	-96.2749	-780.127	-129.105	-821.678	-167.454	-21.3038	-0.89255	-26.2062	2.06773	-22.2971	0.986148	-20.2972
		27	-657.599	-27.5052	-809.109	62.3762	-687.911	29.1892	-627.5	66.5	-598.5	117	-561	160	-721.5	-28.5	-730.32	-96.6483	-782.315	-127.211	-824.785	-164.52	-657.333	-28.6191	-809.503	62.6404	-687.761	29.7662	-627.473	66.6041	-597.99	116.602	-561.743	159.993	-722.395	-27.1632	-730.914	-97.0104	-782.264	-127.716	-825.322	-164.086	-21.222	-0.923966	-26.1348	2.02234	-22.2043	0.961002	-20.2579
		28	-654.231	-30.3119	-807.772	61.4851	-684.543	29.1892	-626	69	-599	119.5	-565	164	-721	-27	-731.51	-97.839	-785.491	-127.211	-829.151	-160.948	-654.735	-29.6924	-807.23	61.1595	-684.627	29.0994	-626.202	67.8542	-599.406	119.004	-564.997	163.702	-720.262	-28.2446	-731.146	-97.6525	-784.037	-126.246	-828.645	-160.443	-21.1381	-0.958619	-26.0614	1.97453	-22.1031	0.939471	-20.2169
		29	-652.547	-30.8732	-805.099	59.2574	-681.175	28.0665	-625	69	-601	121	-569	167	-718	-29.5	-731.51	-98.6329	-785.491	-124.829	-831.929	-156.979	-652.053	-30.8421	-804.812	59.5901	-681.291	28.5653	-625.014	68.7259	-600.97	121.173	-568.414	167.251	-718.003	-29.4304	-731.287	-98.1934	-785.298	-124.544	-831.564	-156.461	-21.0515	-0.995736	-25.9833	1.92386	-21.9955	0.922229	-20.1786
		30	-649.74	-31.4345	-801.98	57.9208	-678.368	28.0665	-623.5	69	-603	122.5	-572	170.5	-715.5	-31	-730.717	-98.2359	-785.094	-122.448	-833.914	-151.819	-649.212	-32.1073	-802.258	57.9508	-677.8	28.1527	-624.015	69.2962	-602.648	123.131	-571.944	170.639	-715.604	-30.7165	-731.352	-98.6627	-786.169	-122.621	-834.081	-152.21	-20.9598	-1.03658	-25.9009	1.87094	-21.8827	0.908907	-20.1463
		31	-645.811	-33.6798	-799.307	56.5842	-674.439	28.0665	-622.5	69	-603.5	126	-575.5	173.5	-713	-31.5	-731.51	-98.6329	-787.872	-120.463	-835.899	-147.453	-646.225	-33.5303	-799.641	56.2134	-674.197	27.7603	-623.273	69.73	-604.412	124.864	-575.646	173.827	-713.081	-32.0682	-731.379	-99.1583	-786.826	-120.575	-836.277	-147.858	-20.8634	-1.08252	-25.8164	1.81485	-21.7664	0.89624	-20.1223
		32	-643.004	-35.3638	-797.079	54.3564	-668.825	28.0665	-623	70	-607	126	-579	178	-710.5	-34	-731.907	-100.221	-785.888	-118.479	-837.883	-143.484	-643.208	-35.0402	-796.979	54.346	-670.639	27.2627	-622.728	70.1181	-606.254	126.287	-579.61	176.722	-710.428	-33.4796	-731.312	-99.6971	-787.307	-118.483	-838.204	-143.507	-20.7659	-1.13127	-25.7304	1.75456	-21.6515	0.880176	-20.1047
		33	-640.198	-36.4865	-794.406	52.5743	-668.825	25.2599	-623	71.5	-608	127	-584	178	-708.5	-35	-730.717	-100.617	-788.269	-116.097	-840.265	-138.721	-640.212	-36.5793	-794.221	52.3788	-667.235	26.6484	-622.155	70.3799	-608.054	127.486	-583.869	179.251	-707.605	-34.8761	-731.122	-100.198	-787.715	-116.396	-839.813	-139.177	-20.6692	-1.18096	-25.6414	1.69105	-21.5416	0.860342	-20.0863
		34	-637.391	-38.1705	-791.287	49.901	-663.773	26.3825	-621.5	70	-610.5	128	-588	182	-704	-36	-731.114	-100.221	-787.872	-114.509	-841.455	-135.546	-637.234	-38.1435	-791.341	50.3845	-663.973	25.8971	-621.444	70.5156	-609.78	128.49	-588.358	181.402	-704.69	-36.2662	-730.845	-100.7	-788.01	-114.326	-841.036	-134.811	-20.5731	-1.23146	-25.5484	1.62666	-21.4363	0.836088	-20.0633
		35	-634.023	-39.8545	-788.614	48.5644	-660.405	25.2599	-620.5	70	-610.5	130	-593.5	183	-701.5	-37.5	-729.526	-101.411	-788.269	-112.128	-841.455	-130.386	-634.267	-39.7384	-788.326	48.4275	-660.855	24.9535	-620.557	70.5722	-611.46	129.259	-592.977	183.166	-701.791	-37.6783	-730.529	-101.275	-788.121	-112.272	-841.841	-130.353	-20.4773	-1.28295	-25.4511	1.56348	-21.3357	0.805622	-20.0347
		36	-631.216	-41.5385	-785.495	46.3366	-657.037	24.1372	-619.5	70.5	-613	129.5	-597.5	184.5	-699	-39.5	-730.717	-101.411	-787.475	-110.937	-842.249	-125.623	-631.32	-41.3687	-785.191	46.5145	-658.02	23.696	-619.565	70.6127	-613.205	129.64	-597.6	184.484	-698.989	-39.0997	-730.176	-101.962	-788.024	-110.221	-842.305	-125.825	-20.3821	-1.33559	-25.3498	1.50172	-21.2442	0.765025	-20.0026
		37	-628.41	-42.0998	-781.04	44.5545	-655.915	22.4532	-618.5	71.5	-615	130.5	-601.5	186	-696	-41	-730.32	-102.999	-787.872	-107.762	-842.646	-121.257	-628.362	-43.0703	-782.008	44.6436	-655.443	22.1266	-618.512	70.5477	-614.975	129.595	-602.172	185.316	-696.264	-40.4891	-729.651	-102.772	-787.683	-108.184	-842.448	-121.289	-20.2866	-1.39052	-25.2471	1.44132	-21.1609	0.714356	-19.9686
		38	-625.603	-46.0291	-779.257	42.7723	-653.108	19.6466	-617	70.5	-617.5	128	-607.5	185	-693.5	-41.5	-727.938	-103.793	-787.872	-105.777	-841.455	-117.288	-625.331	-44.8716	-778.874	42.7829	-652.92	20.3551	-617.428	70.2843	-616.651	129.135	-606.613	185.649	-693.573	-41.8925	-728.903	-103.633	-786.974	-106.275	-842.268	-116.77	-20.1888	-1.44868	-25.1459	1.38125	-21.0795	0.657163	-19.9336
		39	-622.235	-46.5904	-775.248	40.9901	-651.985	17.9626	-616.5	69	-617.5	128.5	-611	186	-691	-42.5	-728.732	-104.587	-785.888	-104.587	-842.646	-111.731	-622.185	-46.6852	-775.744	40.876	-650.3	18.5382	-616.318	69.9063	-618.15	128.375	-610.758	185.566	-690.821	-43.4483	-727.98	-104.495	-785.826	-104.538	-841.76	-112.302	-20.0872	-1.50723	-25.0449	1.31968	-20.9949	0.598505	-19.8978
		40	-618.867	-47.7131	-773.02	39.2079	-646.372	16.8399	-615.5	69.5	-620	128	-615	185	-688.5	-46	-726.748	-105.38	-783.903	-103.396	-840.662	-108.159	-618.932	-48.585	-772.575	38.8655	-647.56	16.6938	-615.117	69.5384	-619.51	127.274	-614.582	185.084	-687.899	-45.2045	-726.823	-105.352	-784.341	-102.916	-840.823	-107.985	-19.9822	-1.56856	-24.9425	1.25477	-20.9064	0.538957	-19.859
		41	-616.06	-51.0811	-769.901	36.9802	-644.127	15.7173	-614	69	-620.5	125.5	-617.5	183.5	-685	-47	-724.763	-105.777	-782.712	-101.014	-839.074	-103.793	-615.602	-50.6405	-769.27	36.7297	-644.938	14.7103	-613.792	69.1496	-620.716	125.793	-618.165	184.262	-684.752	-47.056	-725.458	-106.223	-782.651	-101.355	-839.469	-103.845	-19.8747	-1.63493	-24.8359	1.18582	-20.8218	0.474921	-19.8163
		42	-612.131	-52.2037	-765.891	33.8614	-642.443	12.3493	-612	69	-621.5	124.5	-621.5	183.5	-681	-49	-724.763	-107.365	-780.728	-99.8236	-838.28	-99.4267	-612.232	-52.7795	-765.823	34.525	-642.496	12.5222	-612.397	68.6546	-621.8	124.019	-621.639	183.131	-681.454	-48.9963	-723.903	-107.117	-780.818	-99.8771	-837.707	-99.915	-19.7659	-1.70398	-24.7245	1.11464	-20.743	0.404279	-19.7712
		43	-608.763	-55.5717	-761.881	32.5248	-640.759	10.104	-611	68	-623.5	122	-625	181.5	-678	-50.5	-721.985	-108.159	-778.743	-98.6329	-835.899	-97.0452	-608.937	-54.9442	-762.359	32.3387	-640.095	10.2443	-611.021	67.9551	-622.764	122.036	-625.032	181.599	-678.128	-51.0444	-722.086	-107.973	-778.887	-98.4625	-835.49	-96.2017	-19.6595	-1.77387	-24.6127	1.04405	-20.6654	0.330737	-19.7268
		44	-604.834	-57.2557	-758.317	30.297	-637.391	7.85863	-609.5	67	-623	119.5	-628.5	180.5	-675	-53.5	-719.603	-108.556	-776.362	-97.0452	-832.723	-91.8853	-605.845	-57.0162	-759.041	30.1551	-637.582	8.00187	-609.694	67.0103	-623.592	120.015	-628.312	179.582	-674.821	-53.1874	-720.06	-108.77	-776.897	-97.0734	-832.878	-92.6754	-19.5597	-1.84076	-24.5056	0.973555	-20.5843	0.25834	-19.684
		45	-602.588	-59.501	-755.644	27.6238	-635.707	5.05198	-608.5	66	-624.5	117.5	-631.5	177	-671	-55	-718.015	-109.746	-775.568	-96.2514	-829.945	-89.5039	-602.926	-58.9935	-755.858	27.9794	-634.899	5.86991	-608.403	65.802	-624.313	118.077	-631.455	177.107	-671.554	-55.3518	-717.847	-109.504	-774.79	-95.6975	-830.013	-89.3409	-19.4654	-1.9046	-24.4028	0.903315	-20.4977	0.18951	-19.6423
		46	-600.904	-60.0624	-753.861	26.2871	-631.778	4.49064	-607	65	-625	116.5	-634.5	174.5	-668.5	-58	-716.428	-110.937	-772.393	-93.8699	-826.373	-86.3286	-600.059	-60.9413	-752.722	25.8189	-632.041	3.8707	-607.123	64.3221	-624.962	116.28	-634.453	174.252	-668.333	-57.4447	-715.438	-110.176	-772.502	-94.353	-827.042	-86.1956	-19.3729	-1.96749	-24.3016	0.833563	-20.4054	0.124966	-19.6009
		47	-597.536	-62.869	-749.851	23.6139	-628.971	1.68399	-605.5	62	-625	114	-636.5	170.5	-665.5	-60	-712.459	-109.746	-769.614	-93.473	-823.594	-83.9471	-596.98	-63.0055	-749.468	23.6547	-629.113	1.88949	-605.818	62.6276	-625.533	114.528	-637.33	171.198	-665.09	-59.3728	-712.846	-110.838	-770.038	-93.1332	-824.052	-83.1767	-19.2735	-2.03413	-24.1965	0.76369	-20.3109	0.0610021	-19.5588
		48	-593.607	-65.6757	-745.396	20.9406	-625.042	1.12266	-605	60.5	-626.5	113	-641	168	-662	-61	-710.077	-112.128	-768.026	-91.4884	-822.007	-79.581	-593.604	-65.1858	-746.159	21.5317	-626.207	-0.119905	-604.424	60.8787	-626.027	112.723	-640.078	168.117	-661.779	-61.1491	-710.26	-111.648	-767.41	-92.0846	-820.984	-80.3027	-19.1645	-2.10452	-24.0897	0.695151	-20.2171	-0.00387114	-19.5138
		49	-590.239	-66.7983	-742.723	20.0495	-623.919	-2.80665	-602.5	59	-626	111	-642	164.5	-658	-62.5	-706.902	-112.128	-764.454	-91.4884	-818.037	-77.5965	-589.986	-67.4395	-742.945	19.4823	-623.327	-2.15698	-602.841	59.1356	-626.369	110.697	-642.585	165.062	-658.445	-62.918	-707.838	-112.62	-764.578	-91.2668	-817.719	-77.7042	-19.0477	-2.17728	-23.9859	0.628985	-20.1241	-0.069638	-19.4627
		50	-586.31	-70.1663	-739.604	16.9307	-621.674	-5.05198	-601.5	57.5	-627	109.5	-644.5	162	-655	-64.5	-705.314	-113.716	-761.279	-91.0915	-813.275	-76.0088	-586.216	-69.7777	-739.844	17.4556	-620.284	-4.03552	-601.04	57.3562	-626.53	108.318	-644.842	162.007	-655.172	-64.8067	-705.642	-113.786	-761.588	-90.6568	-814.31	-75.4118	-18.926	-2.25277	-23.8858	0.563554	-20.0258	-0.130287	-19.4045
		51	-581.819	-72.4116	-736.931	15.5941	-616.622	-6.17464	-599	55.5	-625.5	105	-647.5	159.5	-652	-66.5	-704.123	-115.7	-758.897	-90.2977	-810.893	-72.8335	-582.438	-72.1349	-736.791	15.4531	-617.006	-5.67636	-598.98	55.4631	-626.457	105.577	-646.759	158.82	-651.965	-66.8463	-703.544	-115.106	-758.475	-90.2647	-810.87	-73.4307	-18.804	-2.32887	-23.7873	0.498902	-19.92	-0.183261	-19.3381
		52	-579.012	-74.0956	-734.257	13.3663	-613.254	-6.17464	-596.5	54	-627.5	103	-648.5	156.5	-649	-69.5	-701.345	-116.097	-754.928	-89.5039	-808.115	-71.6428	-578.793	-74.4997	-733.671	13.4131	-613.683	-7.23531	-596.689	53.4005	-626.122	102.664	-648.191	155.371	-648.78	-68.9781	-701.34	-116.532	-755.234	-90.1901	-807.341	-71.8423	-18.6863	-2.40522	-23.6865	0.433042	-19.8127	-0.233591	-19.2641
		53	-575.083	-76.9023	-730.248	11.5842	-610.447	-8.98129	-594	51	-625	99	-649	151	-645.5	-71	-699.757	-117.685	-752.15	-89.9008	-803.352	-70.849	-575.325	-76.9097	-730.411	11.274	-610.478	-8.95608	-594.208	51.1526	-625.406	99.7353	-649.127	151.707	-645.582	-71.0909	-698.919	-118.1	-751.909	-90.5275	-803.657	-70.6381	-18.5743	-2.48303	-23.5813	0.363982	-19.7093	-0.289147	-19.184
		54	-571.715	-79.1476	-727.129	9.35644	-607.079	-10.104	-592	48.5	-624.5	96.5	-650	147.5	-642.5	-73.5	-695.788	-120.463	-748.181	-91.8853	-799.383	-69.6582	-572.079	-79.3419	-727.044	8.98588	-607.457	-10.9146	-591.536	48.8068	-624.38	96.9466	-649.639	148.073	-642.373	-73.1477	-696.231	-119.778	-748.518	-91.2207	-799.877	-69.7563	-18.4696	-2.56155	-23.4726	0.290109	-19.6117	-0.352377	-19.0977
		55	-568.909	-82.5156	-723.564	6.23762	-604.272	-13.4719	-589	46.5	-623.5	94.5	-650	144	-639	-75	-693.804	-121.257	-745.402	-91.8853	-797.001	-68.4675	-569.055	-81.7336	-723.603	6.57398	-604.651	-13.102	-588.645	46.4349	-623.099	94.3147	-649.801	144.625	-639.158	-75.1364	-693.352	-121.472	-745.087	-92.1028	-796.005	-69.1699	-18.3719	-2.63877	-23.3615	0.212241	-19.5211	-0.422998	-19.0044
		56	-566.663	-83.6383	-720	4.0099	-602.588	-15.7173	-585	44	-621	92	-649	142	-636	-77	-689.835	-123.241	-741.433	-93.473	-791.444	-69.6582	-566.156	-84.0671	-720.126	4.11019	-601.981	-15.4019	-585.614	44.0534	-621.668	91.7609	-649.77	141.315	-635.946	-77.0905	-690.364	-123.169	-741.627	-93.0761	-792.044	-68.7714	-18.2783	-2.7141	-23.2492	0.132697	-19.4349	-0.49725	-18.9065
[truncated: 198 more columns]

## Sheet: C0010
			RAW COORDINATES																				SPLINE																				mm
			HEAD		TAIL		LEFT COXAE		LEFT FT		LEFT TT		LEFT TIP		RIGHT COXAE		RIGHT FT		RIGHT TT		RIGHT TIP		HEAD		TAIL		LEFT COXAE		LEFT FT		LEFT TT		LEFT TIP		RIGHT COXAE		RIGHT FT		RIGHT TT		RIGHT TIP		HEAD		TAIL		LEFT COXAE		LEFT FT
SCALE		Frame	X	Y	X	Y	X	Y	X	Y	X	Y	X	Y	X	Y	X	Y	X	Y	X	Y	X	Y	X	Y	X	Y	X	Y	X	Y	X	Y	X	Y	X	Y	X	Y	X	Y	X	Y	X	Y	X	Y	X
X	Y	-2	-205.5	-120.5	-45	-197.5	-176.5	-166	-245.5	-163.5	-281.139	-208.515	-321.238	-246.386	-150.5	-117	-203	-57.5	-221.436	-12.4752	-250.842	38.7624	-205.327	-119.759	-45.1625	-197.432	-177.187	-166.262	-245.777	-163.488	-281.643	-207.958	-322.582	-245.673	-151.054	-116.778	-202.816	-58.3102	-221.991	-12.0321	-250.849	38.391	-6.62896	-3.86642	-1.45807	-6.37408	-5.72046	-5.36775	-7.9349
-376.181	421.436	-1	-205.5	-120.5	-45	-197.5	-176.5	-166	-245.5	-163.5	-281.139	-208.515	-321.238	-246.386	-150.5	-117	-203	-57.5	-221.436	-12.4752	-250.842	38.7624	-205.327	-119.759	-45.1625	-197.432	-177.187	-166.262	-245.777	-163.488	-281.643	-207.958	-322.582	-245.673	-151.054	-116.778	-202.816	-58.3102	-221.991	-12.0321	-250.849	38.391	-6.62896	-3.86642	-1.45807	-6.37408	-5.72046	-5.36775	-7.9349
-66.468	425.678	0	-205.5	-120.5	-45	-197.5	-176.5	-166	-245.5	-163.5	-281.139	-208.515	-321.238	-246.386	-150.5	-117	-203	-57.5	-221.436	-12.4752	-250.842	38.7624	-205.327	-119.759	-45.1625	-197.432	-177.187	-166.262	-245.777	-163.488	-281.643	-207.958	-322.582	-245.673	-151.054	-116.778	-202.816	-58.3102	-221.991	-12.0321	-250.849	38.391	-6.62896	-3.86642	-1.45807	-6.37408	-5.72046	-5.36775	-7.9349
		1	-205.5	-120.5	-45	-197.5	-176.5	-166	-245.5	-163.5	-281.139	-208.515	-321.238	-246.386	-150.5	-117	-203	-57.5	-221.436	-12.4752	-250.842	38.7624	-205.327	-119.759	-45.1625	-197.432	-177.187	-166.262	-245.777	-163.488	-281.643	-207.958	-322.582	-245.673	-151.054	-116.778	-202.816	-58.3102	-221.991	-12.0321	-250.849	38.391	-6.62896	-3.86642	-1.45807	-6.37408	-5.72046	-5.36775	-7.9349
DISTANCE (mm)		2	-205.5	-119.5	-45	-196.5	-177	-167.5	-245.5	-168.5	-278.02	-214.307	-317.228	-253.515	-151	-117.5	-201.5	-59.5	-221.436	-10.2475	-249.059	39.2079	-205.715	-120.57	-45.038	-196.648	-175.88	-167.407	-245.583	-167.731	-278.888	-214.441	-316.91	-254.727	-150.686	-117.392	-201.72	-59.3022	-220.934	-10.7198	-249.454	39.3862	-6.64151	-3.89261	-1.45405	-6.34877	-5.67829	-5.40473	-7.92862
pixel	mm	3	-206	-122	-45.5	-195.5	-175	-169	-245.5	-172	-276.683	-220.545	-312.327	-264.208	-151	-118	-200.5	-60.5	-219.653	-9.80198	-248.168	40.5446	-206.151	-121.573	-44.8559	-195.879	-174.404	-168.469	-245.289	-172.021	-275.913	-221.106	-310.799	-263.955	-150.148	-118.089	-200.674	-60.0293	-219.715	-9.53187	-248.034	40.498	-6.65558	-3.92498	-1.44817	-6.32394	-5.63062	-5.439	-7.91914
309.742	10	4	-207	-122	-44.5	-196	-172	-169	-245	-176	-273.564	-227.673	-303.861	-273.119	-150.5	-118	-200.5	-60.5	-218.762	-8.0198	-246.386	40.9901	-206.623	-122.74	-44.5866	-195.084	-172.874	-169.414	-244.79	-176.581	-272.341	-228.073	-303.966	-273.271	-149.387	-118.968	-199.668	-60.298	-218.285	-8.50031	-246.483	41.8048	-6.67081	-3.96266	-1.43948	-6.29829	-5.58124	-5.46952	-7.90303
1	0.032285	5	-207.5	-125	-44	-193.5	-172	-170.5	-244.5	-180.5	-268.218	-234.802	-297.178	-282.03	-147	-120.5	-198	-60.5	-216.535	-7.12871	-244.604	43.6634	-207.095	-124.039	-44.3398	-194.182	-171.56	-170.312	-244.035	-181.638	-267.993	-235.304	-296.49	-282.568	-148.628	-120.064	-198.688	-60.045	-216.636	-7.66476	-244.695	43.3396	-6.68605	-4.00459	-1.43151	-6.26915	-5.53881	-5.49853	-7.87867
		6	-207	-125.5	-43.5	-193	-169.5	-171	-242.5	-187	-263.317	-242.376	-288.267	-291.832	-148	-121	-197.5	-60	-214.307	-7.57426	-243.267	45	-207.632	-125.346	-44.2228	-193.236	-170.588	-171.181	-243.06	-187.221	-263.025	-242.609	-288.55	-291.688	-148.304	-121.207	-197.858	-59.305	-214.857	-6.94038	-242.548	44.9709	-6.70339	-4.04679	-1.42773	-6.23861	-5.50743	-5.52658	-7.84718
LENGTH (mm)		7	-208.5	-126	-45	-192.5	-170	-172	-242.5	-193.5	-257.525	-250.396	-280.693	-300.743	-148	-122.5	-197.5	-57	-213.416	-6.23762	-240.149	46.7822	-208.376	-126.725	-44.2197	-192.196	-170.075	-172.046	-241.985	-193.055	-257.728	-249.648	-280.461	-300.351	-148.523	-122.262	-197.175	-58.2674	-213.012	-6.12914	-239.93	46.5964	-6.7274	-4.0913	-1.42763	-6.20502	-5.49085	-5.55449	-7.81249
Body	5.35005	8	-209	-128.5	-44	-191	-170	-173	-240	-198.5	-252.178	-256.634	-272.228	-308.762	-149	-124	-196.5	-57.5	-210.743	-5.79208	-237.03	48.5644	-209.354	-128.286	-44.1751	-190.934	-169.909	-172.899	-240.861	-198.775	-252.462	-256.044	-272.526	-308.3	-149.202	-123.084	-196.534	-57.2334	-211.057	-5.15293	-236.905	48.1492	-6.75899	-4.14171	-1.42619	-6.16431	-5.48549	-5.58203	-7.77618
R. Femur	2.37867	9	-210.5	-130	-44.5	-190	-170.5	-174	-240	-205.5	-246.386	-262.426	-263.762	-315.446	-151.5	-124	-196	-56	-208.96	-4.0099	-233.02	49.4554	-210.569	-129.997	-44.0604	-189.386	-169.906	-173.717	-239.772	-204.091	-247.541	-261.607	-265.066	-315.402	-150.111	-123.623	-195.879	-56.2705	-208.991	-4.03049	-233.63	49.63	-6.7982	-4.19696	-1.42249	-6.11431	-5.48541	-5.60846	-7.74102
R. Tibia	1.71571	10	-212.5	-132	-44	-187.5	-170	-174.5	-239	-209	-243.267	-265.99	-258.416	-322.129	-150.5	-122.5	-195	-55.5	-207.178	-2.22772	-229.455	50.7921	-211.942	-131.833	-43.876	-187.55	-169.933	-174.516	-238.651	-208.754	-243.137	-266.374	-258.276	-321.654	-151.023	-124.073	-195.174	-55.4199	-206.762	-2.93096	-230.271	51.1345	-6.84253	-4.25623	-1.41653	-6.05504	-5.48628	-5.63423	-7.70484
R. Tarsus	1.69337	11	-213	-133	-43.5	-185	-170	-175	-237.5	-213	-239.257	-270.891	-252.178	-327.03	-152.5	-125	-195	-54.5	-204.505	-1.78218	-227.228	52.5743	-213.393	-133.791	-43.7196	-185.567	-170	-175.376	-237.454	-212.834	-239.151	-270.577	-252.044	-327.116	-151.987	-124.674	-194.398	-54.6805	-204.317	-2.01513	-226.815	52.7226	-6.88938	-4.31944	-1.41149	-5.99104	-5.48843	-5.66202	-7.66618
L. Femur	2.44159	12	-215	-136.5	-44	-184	-170	-176	-236	-215.5	-235.248	-274.01	-245.941	-331.485	-152.5	-125.5	-193	-54.5	-201.386	-1.33663	-223.663	54.3564	-214.942	-135.861	-43.7297	-183.571	-170.165	-176.374	-236.229	-216.546	-235.455	-274.427	-246.222	-331.954	-153.039	-125.35	-193.532	-54.0441	-201.706	-1.26947	-223.052	54.3585	-6.93939	-4.38628	-1.41181	-5.92657	-5.49378	-5.69424	-7.62664
L. Tibia	1.78342	13	-217	-138	-43.5	-181.5	-170.5	-178	-235	-220.5	-232.129	-277.574	-240.149	-336.386	-154.5	-126	-192.5	-53	-199.158	-0.891089	-219.208	56.1386	-216.554	-137.9	-44.0169	-181.584	-170.484	-177.476	-235.045	-220.099	-231.941	-278.157	-240.687	-336.313	-154.273	-126.019	-192.652	-53.4919	-199.029	-0.591402	-218.854	55.9525	-6.99145	-4.45209	-1.42108	-5.86244	-5.50405	-5.72979	-7.58841
L. Tarsus	1.6947	14	-218	-139.5	-44.5	-180	-171	-178.5	-234	-223.5	-228.564	-281.584	-236.584	-340.396	-155.5	-127	-192.5	-53	-196.04	0	-213.861	57.4752	-218.212	-139.869	-44.7117	-179.693	-170.971	-178.57	-233.916	-223.494	-228.468	-281.895	-235.227	-340.234	-155.701	-126.648	-191.739	-53.0705	-196.328	0.102619	-214.278	57.4171	-7.04497	-4.51565	-1.44351	-5.80139	-5.5198	-5.76512	-7.55198
		15	-219.5	-142.5	-45.5	-177	-172	-179.5	-233	-227	-225.446	-285.149	-229.455	-343.515	-157.5	-127	-190.5	-53	-193.366	0.445545	-209.406	58.3663	-219.99	-141.768	-45.8303	-178.006	-171.642	-179.641	-232.841	-226.766	-224.934	-285.592	-229.572	-343.753	-157.344	-127.231	-190.755	-52.7366	-193.643	0.818321	-209.471	58.71	-7.10236	-4.57698	-1.47963	-5.74691	-5.54145	-5.7997	-7.51725
mg	14	16	-222.5	-143	-47.5	-176.5	-172	-181	-231.5	-230	-220.99	-290.05	-223.663	-347.079	-158.5	-127.5	-189.5	-52.5	-191.139	1.78218	-204.059	60.1485	-221.911	-143.561	-47.2929	-176.637	-172.536	-180.679	-231.84	-229.988	-221.297	-289.071	-223.719	-346.937	-159.201	-127.825	-189.808	-52.4179	-190.939	1.49996	-204.5	59.7934	-7.16438	-4.63488	-1.52685	-5.70273	-5.57031	-5.83321	-7.48495
		17	-223.5	-145.5	-49.5	-176	-173.5	-181.5	-230.5	-233	-217.426	-292.723	-217.426	-349.752	-162	-128.5	-189	-52	-188.465	2.22772	-199.604	60.5941	-223.908	-145.326	-48.9441	-175.485	-173.747	-181.655	-230.959	-233.286	-217.621	-292.09	-217.715	-349.814	-161.255	-128.437	-188.978	-52.1026	-188.112	2.0172	-199.37	60.5745	-7.22887	-4.69185	-1.58016	-5.66552	-5.60941	-5.86472	-7.45649
		18	-226.5	-147	-50.5	-174.5	-175.5	-182.5	-230.5	-236	-213.861	-294.95	-211.634	-351.98	-164	-129.5	-188.5	-52	-185.347	1.78218	-194.257	61.0396	-226	-147.063	-50.6884	-174.386	-175.253	-182.598	-230.146	-236.785	-213.916	-294.644	-211.571	-352.428	-163.38	-128.993	-188.258	-51.8069	-185.109	2.29466	-193.997	61.0232	-7.29639	-4.74792	-1.63647	-5.63004	-5.65802	-5.89517	-7.43025
		19	-228	-148.5	-53	-173	-177	-183.5	-230	-240	-210.297	-295.842	-205.396	-354.653	-165	-129.5	-187.5	-51.5	-181.782	3.11881	-188.911	61.0396	-228.17	-148.777	-52.5579	-173.294	-176.959	-183.513	-229.248	-240.502	-210.129	-296.94	-205.233	-354.793	-165.614	-129.439	-187.645	-51.539	-181.982	2.29184	-188.338	61.1346	-7.36647	-4.80325	-1.69683	-5.59478	-5.7131	-5.92471	-7.40127
		20	-230.5	-150.5	-54.5	-173	-179	-184.5	-228	-245	-206.733	-298.515	-198.267	-356.881	-167.5	-129.5	-187	-51	-178.663	1.78218	-181.782	61.0396	-230.486	-150.453	-54.5985	-172.201	-178.815	-184.374	-228.208	-244.233	-206.192	-299.233	-198.654	-356.809	-168.144	-129.848	-187.183	-51.3432	-178.846	1.91044	-182.454	60.9036	-7.44125	-4.85736	-1.76271	-5.55949	-5.77303	-5.95251	-7.3677
		21	-233	-152.5	-56.5	-170.5	-181	-185.5	-227	-249	-201.832	-301.634	-192.475	-358.663	-171.5	-130	-187	-51.5	-175.99	0.891089	-176.436	60.1485	-233.005	-152.011	-56.9404	-171.083	-180.805	-185.154	-227.15	-247.655	-202.104	-301.501	-191.806	-358.321	-171.018	-130.313	-186.885	-51.2464	-175.771	1.204	-176.517	60.3119	-7.52256	-4.90768	-1.83832	-5.5234	-5.83729	-5.97768	-7.33351
		22	-235.5	-153.5	-59	-170	-183	-185.5	-225.5	-250	-198.267	-303.861	-184.455	-359.109	-174	-131	-186.5	-51.5	-172.426	0.891089	-170.644	59.2574	-235.776	-153.397	-59.6911	-170.05	-182.97	-185.871	-226.18	-250.669	-197.981	-303.507	-184.618	-359.205	-174.127	-130.834	-186.724	-51.2095	-172.79	0.225984	-170.57	59.3575	-7.61203	-4.95241	-1.92713	-5.49006	-5.90716	-6.00085	-7.30223
		23	-239	-154.5	-63	-169.5	-185	-187	-225.5	-253.5	-193.366	-305.198	-178.218	-360	-177.5	-132	-187	-51	-170.198	-2.22772	-164.851	57.9208	-238.834	-154.672	-62.8138	-169.121	-185.404	-186.612	-225.326	-253.488	-193.922	-305.023	-177.143	-359.412	-177.429	-131.331	-186.673	-51.2482	-169.953	-1.01086	-164.605	58.0034	-7.71075	-4.99359	-2.02794	-5.46005	-5.98575	-6.02476	-7.27465
		24	-242	-155.5	-67.5	-168	-187.5	-187	-225.5	-255.5	-190.248	-306.535	-168.861	-358.218	-181	-131.5	-187	-51.5	-167.079	-1.78218	-158.614	56.5842	-242.158	-155.943	-66.0995	-168.291	-188.199	-187.417	-224.458	-256.25	-190.048	-305.916	-169.494	-358.923	-180.886	-131.78	-186.68	-51.4444	-167.254	-2.42924	-158.641	56.1759	-7.81807	-5.0346	-2.13402	-5.43327	-6.07599	-6.05075	-7.24662
		25	-245.5	-157.5	-68.5	-167.5	-192	-188	-223	-258.5	-186.238	-306.089	-161.733	-358.218	-184.5	-132	-186.5	-52	-164.851	-4.45545	-153.267	53.9109	-245.743	-157.254	-69.4221	-167.624	-191.317	-188.372	-223.508	-259.014	-186.377	-306.151	-161.983	-357.808	-184.473	-132.303	-186.773	-51.8433	-164.712	-4.15426	-152.754	53.7998	-7.93379	-5.07694	-2.24129	-5.41172	-6.17665	-6.0816	-7.21594
		26	-250	-159	-73.5	-167	-194	-189.5	-222.5	-262.5	-182.673	-305.644	-154.604	-355.545	-188	-133	-187	-52	-162.624	-5.34653	-146.584	50.7921	-249.54	-158.556	-72.9322	-167.13	-194.575	-189.469	-222.624	-261.641	-182.937	-305.84	-154.828	-356.035	-188.199	-132.982	-187.055	-52.4977	-162.33	-6.2499	-147.059	50.8946	-8.05638	-5.11899	-2.35461	-5.39579	-6.28185	-6.11701	-7.18742
		27	-253.5	-159	-75.5	-167	-199.5	-191	-221.5	-264.5	-180.446	-305.198	-148.366	-354.653	-192	-133.5	-187.5	-53.5	-159.95	-8.91089	-141.238	47.6733	-253.465	-159.856	-76.6824	-166.77	-197.876	-190.592	-221.894	-263.881	-179.717	-305.104	-148.138	-353.596	-192.073	-133.812	-187.585	-53.4706	-160.147	-8.76077	-141.757	47.5223	-8.18309	-5.16094	-2.47569	-5.38415	-6.38842	-6.15326	-7.16385
		28	-257	-161.5	-81.5	-166.5	-200.5	-191.5	-222	-265.5	-176.436	-303.861	-141.683	-350.644	-196.5	-134.5	-188.5	-55	-158.168	-12.0297	-136.337	43.2178	-257.525	-161.225	-80.735	-166.478	-201.121	-191.635	-221.324	-265.684	-176.682	-304.022	-141.971	-350.454	-196.057	-134.757	-188.385	-54.7228	-158.267	-11.5515	-136.942	43.7364	-8.31418	-5.20513	-2.60653	-5.37472	-6.49317	-6.18693	-7.14543
		29	-262	-162.5	-84.5	-166.5	-204	-192.5	-220.5	-267	-173.762	-302.525	-136.337	-345.743	-200	-136.5	-189.5	-56	-156.832	-15.1485	-133.663	39.6535	-261.733	-162.581	-84.9589	-166.236	-204.513	-192.578	-220.861	-267.181	-173.934	-302.674	-136.409	-346.796	-200.109	-135.699	-189.464	-56.209	-156.758	-14.497	-132.527	39.5896	-8.45005	-5.24892	-2.74289	-5.36692	-6.60268	-6.21738	-7.13049
		30	-266.5	-164.5	-89.5	-166	-208	-194	-220.5	-269	-171.98	-300.743	-131.436	-343.069	-204.5	-137	-190.5	-57.5	-155.05	-16.4851	-128.762	35.198	-265.999	-163.852	-89.304	-166.06	-208.176	-193.391	-220.565	-268.486	-171.548	-301.098	-131.475	-342.852	-204.278	-136.489	-190.854	-57.9367	-155.662	-17.626	-128.325	35.0288	-8.58777	-5.28996	-2.88317	-5.36124	-6.72096	-6.24361	-7.12093
		31	-270	-165	-94	-165.5	-212	-194	-220.5	-268.5	-169.307	-299.851	-127.426	-338.168	-207.5	-136.5	-192.5	-60	-155.495	-20.9406	-123.861	30.297	-270.292	-165.001	-93.6703	-166.023	-212.075	-194.05	-220.448	-269.687	-169.574	-299.273	-127.16	-338.636	-208.626	-137.171	-192.581	-59.8572	-154.994	-21.0781	-124.395	29.9957	-8.72637	-5.32704	-3.02414	-5.36004	-6.84683	-6.26489	-7.11714
		32	-274.5	-165.5	-98	-166	-216.5	-194	-220.5	-271.5	-167.525	-297.624	-122.97	-334.604	-213.5	-137.5	-195	-62.5	-154.604	-25.396	-121.188	24.505	-274.694	-166.13	-97.995	-166.169	-216.099	-194.665	-220.488	-270.917	-168.132	-297.118	-123.454	-334.127	-213.197	-137.917	-194.587	-61.8183	-154.664	-24.7627	-120.932	24.4912	-8.86848	-5.3635	-3.16377	-5.36475	-6.97673	-6.28474	-7.11844
		33	-279	-167.5	-102.5	-167	-220.5	-195.5	-220.5	-272	-167.525	-294.059	-120.743	-330.149	-218.5	-139	-197	-63.5	-154.604	-28.0693	-117.624	18.7129	-279.237	-167.346	-102.302	-166.411	-220.133	-195.33	-220.675	-272.096	-167.273	-294.694	-120.382	-329.233	-217.806	-138.75	-196.801	-63.7143	-154.659	-28.5289	-118.049	18.595	-9.01515	-5.40277	-3.30281	-5.37257	-7.10697	-6.30621	-7.12447
		34	-284	-168.5	-106	-167	-224	-196	-222.5	-272.5	-166.634	-292.277	-118.069	-323.465	-222.5	-140	-199	-65	-155.05	-32.9703	-115.396	12.0297	-283.88	-168.619	-106.646	-166.627	-224.171	-195.995	-220.992	-273.207	-166.911	-292.172	-117.89	-323.999	-222.314	-139.574	-199.25	-65.5907	-154.976	-32.3359	-115.86	12.4138	-9.16504	-5.44387	-3.44305	-5.37955	-7.23734	-6.32768	-7.1347
		35	-289	-170	-111.5	-166.5	-228	-197	-220.5	-275	-167.525	-289.604	-116.287	-317.673	-226.5	-140	-202	-68	-155.495	-36.0891	-114.505	6.23762	-288.523	-169.913	-111.09	-166.841	-228.302	-196.611	-221.47	-274.204	-166.963	-289.614	-115.991	-318.675	-226.768	-140.35	-202.018	-67.4491	-155.601	-36.1107	-114.375	6.06004	-9.31494	-5.48562	-3.58653	-5.38645	-7.37073	-6.34758	-7.15014
		36	-293	-171	-116	-167	-232.5	-197.5	-221	-275.5	-167.97	-286.931	-114.505	-313.663	-231	-141.5	-204.5	-69	-157.277	-39.2079	-114.059	-0.445545	-293.107	-171.176	-115.585	-167.175	-232.583	-197.164	-222.417	-274.917	-167.332	-287.071	-114.777	-313.382	-231.279	-141.13	-205.141	-69.1763	-156.527	-39.8968	-113.477	-0.424367	-9.46295	-5.52639	-3.73167	-5.39725	-7.50892	-6.36543	-7.18073
		37	-298	-172.5	-119.5	-167.5	-237	-197	-225	-275	-167.525	-284.703	-113.614	-308.317	-236	-142	-208.5	-71	-157.723	-44.5545	-113.168	-7.12871	-297.684	-172.361	-120.163	-167.686	-236.983	-197.745	-223.928	-275.353	-168.068	-284.586	-114.4	-308.001	-235.895	-141.934	-208.601	-70.7403	-157.77	-43.73	-113.09	-6.98015	-9.61072	-5.56466	-3.87947	-5.41374	-7.651	-6.38418	-7.22952
		38	-302	-173.5	-125	-168	-241.5	-198	-225.5	-275.5	-168.416	-282.03	-114.95	-302.525	-240.5	-142.5	-213	-72	-158.614	-47.2277	-112.277	-13.8119	-302.325	-173.394	-124.935	-168.36	-241.442	-198.503	-225.779	-275.676	-169.368	-282.181	-114.925	-302.439	-240.59	-142.846	-212.228	-72.1155	-159.507	-47.535	-113.279	-13.5512	-9.76056	-5.59802	-4.03353	-5.4355	-7.79493	-6.40865	-7.28928
		39	-306.5	-174.5	-129.5	-170	-246	-200	-228	-276	-171.089	-279.802	-115.842	-297.178	-245.5	-143.5	-215.5	-73.5	-160.842	-51.2376	-114.059	-20.0495	-307.149	-174.229	-129.888	-169.111	-245.896	-199.407	-227.895	-275.992	-171.287	-279.884	-116.222	-296.693	-245.341	-143.971	-215.836	-73.3186	-161.899	-51.3673	-114.104	-20.1312	-9.91629	-5.62497	-4.19343	-5.45974	-7.93875	-6.43783	-7.35758
		40	-312.5	-175	-135.5	-169.5	-250.5	-200.5	-230	-276	-174.208	-277.574	-118.069	-290.05	-250	-145.5	-220	-74.5	-165.743	-55.2475	-115.396	-26.2871	-312.181	-174.865	-134.965	-169.81	-250.307	-200.304	-230.202	-276.349	-173.621	-277.693	-118.101	-290.827	-250.117	-145.309	-219.39	-74.3649	-164.838	-55.2521	-115.399	-26.7769	-10.0788	-5.64552	-4.35734	-5.48232	-8.08114	-6.46679	-7.43208
		41	-317.5	-175	-140	-170.5	-254.5	-201	-233	-277	-176.436	-275.792	-121.188	-285.149	-255	-147	-222.5	-75	-168.416	-59.2574	-117.624	-33.8614	-317.3	-175.38	-140.054	-170.494	-254.67	-201.158	-232.626	-276.766	-176.103	-275.571	-120.286	-284.976	-254.916	-146.744	-222.857	-75.3125	-167.977	-59.1674	-116.93	-33.5134	-10.244	-5.66214	-4.52163	-5.5044	-8.22201	-6.49437	-7.51032
[truncated: 198 more columns]

## Sheet: C0012
			RAW COORDINATES																				SPLINE																				mm
			HEAD		TAIL		LEFT COXAE		LEFT FT		LEFT TT		LEFT TIP		RIGHT COXAE		RIGHT FT		RIGHT TT		RIGHT TIP		HEAD		TAIL		LEFT COXAE		LEFT FT		LEFT TT		LEFT TIP		RIGHT COXAE		RIGHT FT		RIGHT TT		RIGHT TIP		HEAD		TAIL		LEFT COXAE		LEFT FT
SCALE		Frame	X	Y	X	Y	X	Y	X	Y	X	Y	X	Y	X	Y	X	Y	X	Y	X	Y	X	Y	X	Y	X	Y	X	Y	X	Y	X	Y	X	Y	X	Y	X	Y	X	Y	X	Y	X	Y	X	Y	X
X	Y	-2	-222.083	102.2	-395.01	66.4833	-265.933	123.065	-212.534	160.55	-177.327	204.95	-134.109	241.485	-262.397	66.4833	-190.5	51	-159.505	4.0099	-121.634	-36.0891	-222.215	102.119	-395.54	66.7043	-265.542	123.24	-212.139	160.6	-177.031	204.863	-133.982	241.101	-263.592	66.7343	-190.512	51.8958	-159.654	4.04769	-121.724	-36.6687	-7.17419	3.29692	-12.77	2.15354	-8.573	3.97881	-6.84891
-376.181	421.436	-1	-222.083	102.2	-395.01	66.4833	-265.933	123.065	-212.534	160.55	-177.327	204.95	-134.109	241.485	-262.397	66.4833	-190.5	51	-159.505	4.0099	-121.634	-36.0891	-222.215	102.119	-395.54	66.7043	-265.542	123.24	-212.139	160.6	-177.031	204.863	-133.982	241.101	-263.592	66.7343	-190.512	51.8958	-159.654	4.04769	-121.724	-36.6687	-7.17419	3.29692	-12.77	2.15354	-8.573	3.97881	-6.84891
-66.468	425.678	0	-222.083	102.2	-395.01	66.4833	-265.933	123.065	-212.534	160.55	-177.327	204.95	-134.109	241.485	-262.397	66.4833	-190.5	51	-159.505	4.0099	-121.634	-36.0891	-222.215	102.119	-395.54	66.7043	-265.542	123.24	-212.139	160.6	-177.031	204.863	-133.982	241.101	-263.592	66.7343	-190.512	51.8958	-159.654	4.04769	-121.724	-36.6687	-7.17419	3.29692	-12.77	2.15354	-8.573	3.97881	-6.84891
		1	-222.083	102.2	-395.01	66.4833	-265.933	123.065	-212.534	160.55	-177.327	204.95	-134.109	241.485	-262.397	66.4833	-190.5	51	-159.505	4.0099	-121.634	-36.0891	-222.215	102.119	-395.54	66.7043	-265.542	123.24	-212.139	160.6	-177.031	204.863	-133.982	241.101	-263.592	66.7343	-190.512	51.8958	-159.654	4.04769	-121.724	-36.6687	-7.17419	3.29692	-12.77	2.15354	-8.573	3.97881	-6.84891
DISTANCE (mm)		2	-221.729	101.493	-395.717	67.8978	-264.872	123.772	-211.827	161.965	-178.218	206.287	-136.337	243.713	-265.58	66.8369	-191	50	-162.624	-0.445545	-126.535	-43.2178	-221.472	101.687	-395.408	67.6059	-265.151	123.626	-212.128	161.371	-178.055	206.443	-135.832	243.972	-264.193	66.4309	-191.369	49.2581	-162.777	-0.466382	-126.289	-43.2704	-7.15022	3.28295	-12.7657	2.18265	-8.56037	3.99125	-6.84855
pixel	mm	3	-220.314	101.493	-395.717	68.2515	-264.519	124.126	-211.827	162.318	-178.663	208.515	-136.782	246.832	-264.872	66.1297	-192.5	47	-165.743	-4.90099	-130.545	-50.3465	-220.699	101.27	-395.112	68.4487	-264.877	123.959	-212.235	162.159	-179.188	208.045	-137.753	246.959	-264.464	66.0648	-192.202	46.3566	-165.84	-4.99217	-130.838	-49.6712	-7.12525	3.26951	-12.7562	2.20986	-8.55155	4.00202	-6.85201
309.742	10	4	-220.314	101.139	-394.303	69.3124	-264.872	123.772	-212.534	162.318	-180.446	209.851	-140.792	250.396	-263.811	65.4224	-193	43	-169.752	-9.35644	-135.446	-56.1386	-219.901	100.856	-394.594	69.229	-264.756	124.233	-212.486	163.123	-180.55	209.679	-139.879	250.114	-264.415	65.6697	-192.918	43.1331	-168.744	-9.53148	-135.393	-55.6965	-7.0995	3.25613	-12.7394	2.23505	-8.54764	4.01084	-6.8601
1	0.032285	5	-218.546	99.725	-393.949	70.0196	-264.872	125.187	-212.888	163.733	-181.782	211.188	-142.129	252.624	-264.165	65.0688	-193.5	40	-171.089	-14.2574	-140.347	-61.4851	-219.035	100.485	-393.933	69.9196	-264.73	124.457	-212.799	164.451	-182.141	211.468	-142.199	253.458	-264.194	65.3028	-193.476	39.7106	-171.416	-14.0542	-139.925	-61.3477	-7.07155	3.24414	-12.7181	2.25735	-8.5468	4.01808	-6.87022
		6	-218.193	100.432	-392.888	70.3733	-264.165	124.126	-212.888	166.562	-184.455	212.97	-143.911	257.525	-263.811	65.4224	-194	35.5	-173.762	-18.7129	-144.802	-65.9406	-218.103	100.231	-393.18	70.5069	-264.757	124.59	-213.087	166.11	-183.888	213.581	-144.853	257.024	-263.833	64.9555	-193.873	36.2351	-173.986	-18.4966	-144.427	-66.7733	-7.04144	3.23597	-12.6938	2.27631	-8.54766	4.02237	-6.87949
LENGTH (mm)		7	-217.132	100.079	-392.181	71.4342	-265.226	124.833	-213.949	168.33	-185.792	216.089	-147.921	261.089	-263.811	64.7151	-194.5	33.5	-176.881	-22.2772	-148.366	-71.7327	-217.021	100.026	-392.354	70.997	-264.799	124.702	-213.271	167.888	-185.664	216.101	-147.966	260.698	-263.319	64.5785	-194.123	32.8688	-176.558	-22.8438	-149.01	-72.131	-7.00652	3.22933	-12.6671	2.29214	-8.54901	4.02599	-6.88544
Body	5.35005	8	-216.424	100.079	-391.827	71.0806	-264.872	124.833	-213.595	169.745	-187.574	218.762	-151.931	263.762	-262.043	63.6542	-194	29	-179.109	-26.7327	-153.713	-77.9703	-215.708	99.8034	-391.398	71.3965	-264.716	124.808	-213.274	169.658	-187.456	218.952	-151.437	264.455	-262.664	64.223	-194.292	29.659	-179.184	-27.1094	-153.86	-77.3736	-6.96413	3.22215	-12.6363	2.30503	-8.54633	4.02941	-6.88553
R. Femur	2.37867	9	-213.595	99.3713	-390.059	71.7878	-264.165	124.833	-212.534	171.513	-188.911	222.327	-155.495	268.663	-261.69	64.0079	-194	26.5	-181.782	-31.1881	-159.059	-81.9802	-214.151	99.538	-390.226	71.7857	-264.44	124.927	-213.178	171.425	-189.323	222.013	-155.132	268.349	-261.954	63.9658	-194.523	26.7175	-181.97	-31.1688	-159.027	-82.35	-6.91386	3.21358	-12.5984	2.3176	-8.53745	4.03326	-6.88244
R. Tibia	1.71571	10	-212.181	99.3713	-389.352	71.7878	-264.165	124.833	-212.888	172.927	-191.584	224.554	-158.614	271.782	-261.336	64.0079	-194.5	24	-184.455	-36.0891	-164.851	-86.8812	-212.476	99.2603	-388.828	72.1979	-263.951	125.087	-213.142	173.242	-191.33	225.135	-159.047	272.316	-261.147	63.7643	-194.883	24.0293	-185.015	-34.7804	-164.494	-87.0014	-6.85978	3.20461	-12.5533	2.33091	-8.52163	4.03842	-6.88129
R. Tarsus	1.69337	11	-211.12	99.0177	-386.523	72.4951	-263.458	125.54	-213.242	175.049	-193.366	229.455	-163.069	276.683	-260.629	63.6542	-196	21.5	-188.02	-38.3168	-168.861	-92.2277	-210.706	98.9847	-387.213	72.6259	-263.181	125.28	-213.182	175.171	-193.472	228.198	-163.265	276.295	-260.115	63.5667	-195.282	21.4909	-188.339	-37.7601	-170.263	-91.2115	-6.80265	3.19572	-12.5011	2.34472	-8.49679	4.04465	-6.88258
L. Femur	2.44159	12	-208.644	98.664	-385.815	73.556	-262.043	125.54	-213.595	177.171	-196.04	230.347	-167.97	280.693	-258.507	63.3006	-195.5	19.5	-192.475	-39.6535	-177.327	-94.901	-208.79	98.7433	-385.456	72.9615	-262.117	125.451	-213.222	177.2	-195.773	231.039	-167.779	280.142	-258.789	63.3845	-195.554	18.9802	-191.806	-40.2547	-176.339	-94.8738	-6.74077	3.18792	-12.4444	2.35556	-8.46243	4.05017	-6.88385
L. Tibia	1.78342	13	-206.523	98.3104	-383.34	73.556	-260.629	125.54	-213.242	179.293	-197.822	233.911	-172.871	283.366	-257.446	62.947	-196	16.5	-195.594	-41.8812	-182.673	-98.0198	-206.743	98.5776	-383.53	73.0771	-260.813	125.594	-213.206	179.27	-198.262	233.709	-172.525	283.802	-257.21	63.2579	-195.671	16.405	-195.212	-42.578	-182.485	-98.1078	-6.67469	3.18257	-12.3822	2.35929	-8.42034	4.05479	-6.88334
L. Tarsus	1.6947	14	-204.754	98.664	-381.218	72.8487	-259.214	125.54	-212.888	181.415	-200.941	236.584	-177.327	287.376	-254.971	63.3006	-195.5	13.5	-198.713	-44.1089	-188.911	-100.248	-204.561	98.4977	-381.436	73.0006	-259.313	125.736	-213.169	181.309	-200.996	236.184	-177.49	287.346	-255.398	63.1953	-195.652	13.7975	-198.511	-44.8991	-188.619	-101.092	-6.60424	3.17999	-12.3146	2.35682	-8.37192	4.05939	-6.88216
		15	-202.279	98.3104	-379.45	72.4951	-257.446	126.248	-213.242	183.536	-203.614	238.366	-182.228	290.495	-253.556	63.3006	-195.5	11	-200.941	-48.5644	-194.703	-103.812	-202.191	98.4576	-379.141	72.894	-257.61	125.887	-213.161	183.256	-203.945	238.468	-182.74	290.776	-253.386	63.1357	-195.581	11.2242	-201.793	-47.1489	-194.778	-103.939	-6.52771	3.1787	-12.2406	2.35338	-8.31693	4.06424	-6.88191
mg	14	16	-199.45	98.664	-376.974	72.8487	-255.678	125.54	-213.242	184.597	-207.624	240.149	-188.465	294.505	-251.081	63.3006	-195.5	9	-205.842	-49.0099	-200.941	-106.485	-199.616	98.4258	-376.571	72.8893	-255.653	126.026	-213.173	185.088	-207.024	240.664	-188.298	294.061	-251.133	63.0335	-195.519	8.67654	-205.168	-49.1191	-201.067	-106.555	-6.44459	3.17767	-12.1576	2.35323	-8.25373	4.06874	-6.88228
		17	-196.974	98.3104	-373.438	72.8487	-254.263	126.248	-212.888	186.365	-209.851	241.931	-194.257	296.287	-249.312	62.5933	-195	6	-208.069	-50.7921	-207.178	-109.604	-196.843	98.3602	-373.729	73.0167	-253.349	126.179	-213.201	186.829	-210.1	242.844	-194.066	297.131	-248.611	62.902	-195.5	6.09609	-208.598	-50.873	-207.587	-108.767	-6.35506	3.17556	-12.0658	2.35734	-8.17937	4.07368	-6.8832
		18	-193.792	98.3104	-370.255	73.2024	-250.373	126.601	-213.595	189.194	-213.416	245.941	-200.05	300.297	-245.069	62.5933	-196	3.5	-212.079	-52.1287	-214.307	-110.495	-193.851	98.2619	-370.713	73.2648	-250.656	126.285	-213.246	188.375	-213.147	244.906	-199.971	299.957	-245.827	62.8071	-195.521	3.48013	-212.124	-52.5248	-214.382	-110.427	-6.25848	3.17238	-11.9685	2.36535	-8.09242	4.07709	-6.88465
		19	-190.609	97.9568	-367.78	73.9096	-247.544	126.248	-212.888	190.255	-216.089	246.832	-205.396	302.97	-242.593	62.947	-196	1	-215.644	-53.4653	-221.436	-110.941	-190.639	98.1366	-367.554	73.5783	-247.723	126.287	-213.26	189.541	-216.131	246.568	-205.994	302.358	-242.903	62.7474	-195.49	0.82349	-215.701	-54.1414	-221.39	-111.575	-6.15476	3.16834	-11.8665	2.37547	-7.99773	4.07718	-6.88509
		20	-187.426	97.9568	-364.244	73.556	-244.008	126.248	-213.242	190.255	-219.208	247.723	-212.97	303.861	-240.472	62.5933	-195	-2	-219.208	-56.1386	-228.564	-112.277	-187.194	97.9885	-364.172	73.8967	-244.678	126.205	-213.235	190.338	-219.062	247.748	-212.111	304.22	-239.811	62.6668	-195.426	-1.8699	-219.24	-55.6566	-228.514	-112.281	-6.04356	3.16355	-11.7573	2.38575	-7.89943	4.07453	-6.88428
		21	-183.536	97.9568	-360.707	74.2633	-242.24	125.54	-213.242	190.963	-221.436	248.614	-218.317	305.644	-236.582	62.5933	-195	-4	-223.218	-57.0297	-234.802	-112.723	-183.512	97.7814	-360.516	74.2122	-241.554	126.068	-213.099	190.984	-221.964	248.481	-218.216	305.568	-236.445	62.538	-195.466	-4.56213	-222.634	-56.8549	-235.662	-112.472	-5.92466	3.15687	-11.6392	2.39594	-7.79855	4.07011	-6.87988
		22	-179.646	97.6031	-356.817	74.9705	-237.642	126.248	-212.888	190.255	-224.554	248.168	-223.663	306.089	-232.692	62.2397	-195.5	-7.5	-225.446	-57.4752	-243.713	-112.277	-179.635	97.4717	-356.578	74.4612	-238.257	125.883	-212.768	191.718	-224.861	248.819	-224.37	306.382	-232.844	62.3317	-195.655	-7.20299	-225.8	-57.602	-242.712	-112.054	-5.79952	3.14687	-11.5121	2.40398	-7.69213	4.06414	-6.86922
		23	-175.403	96.8959	-351.866	74.6169	-235.167	125.894	-212.534	192.024	-228.564	249.505	-229.901	306.98	-228.802	62.2397	-196	-10	-229.01	-58.3663	-249.95	-110.941	-175.63	97.0615	-352.409	74.6011	-234.782	125.56	-212.2	192.685	-227.65	248.806	-230.667	306.625	-229.101	62.0217	-195.894	-9.63839	-228.765	-57.8239	-249.401	-111.001	-5.67021	3.13363	-11.3775	2.40849	-7.57992	4.05371	-6.85087
		24	-171.513	96.5422	-348.33	74.6169	-231.277	125.187	-211.12	195.206	-229.901	247.723	-237.475	306.535	-225.265	61.8861	-196.5	-12	-231.238	-57.9208	-254.851	-109.158	-171.552	96.5834	-348.096	74.7093	-231.039	125.08	-211.404	193.658	-230.179	248.385	-237.002	306.214	-225.27	61.5764	-196.034	-11.7705	-231.522	-57.4584	-255.679	-109.35	-5.53855	3.11819	-11.2383	2.41199	-7.45908	4.03822	-6.82518
		25	-166.916	96.1886	-344.086	74.6169	-227.033	124.479	-210.413	194.499	-232.574	248.168	-244.158	304.307	-221.375	60.8251	-195.5	-13	-233.911	-56.1386	-261.535	-107.376	-167.403	96.0374	-343.627	74.8906	-227.008	124.528	-210.459	194.266	-232.469	247.584	-243.08	305.151	-221.325	61.0261	-195.963	-13.614	-234.086	-56.5859	-261.631	-107.127	-5.40461	3.10056	-11.094	2.41784	-7.32894	4.0204	-6.79465
		26	-163.733	95.4813	-338.428	74.6169	-222.79	123.418	-209.352	194.853	-234.356	246.832	-248.168	304.307	-217.839	60.1179	-196	-15.5	-236.139	-55.2475	-267.772	-105.149	-163.137	95.4133	-339.041	75.214	-222.745	124.029	-209.392	194.466	-234.538	246.353	-248.732	303.483	-217.227	60.4729	-195.658	-15.2214	-236.407	-55.3978	-267.179	-104.323	-5.26686	3.08041	-10.9459	2.42828	-7.19131	4.00427	-6.76022
		27	-158.782	94.7741	-334.185	75.6778	-218.193	123.418	-207.937	193.792	-236.584	243.713	-253.515	300.743	-212.534	60.1179	-195.5	-16.5	-238.812	-53.4653	-272.228	-99.802	-158.625	94.7368	-334.459	75.6469	-218.328	123.667	-208.205	194.375	-236.402	244.765	-254.033	301.131	-212.981	59.9704	-195.035	-16.534	-238.367	-54.0009	-272.211	-101.023	-5.1212	3.05857	-10.798	2.44226	-7.04872	3.99259	-6.72187
		28	-153.831	93.7132	-330.295	76.7387	-213.242	123.418	-207.23	194.145	-237.475	243.267	-259.307	298.96	-208.291	59.7642	-194	-18	-240.594	-52.5743	-276.683	-97.1287	-153.858	94.0599	-329.873	76.0068	-213.841	123.372	-206.869	194.182	-238.05	242.976	-258.958	298.132	-208.711	59.4881	-194.086	-17.5201	-239.801	-52.4124	-276.743	-97.4435	-4.9673	3.03672	-10.6499	2.45387	-6.90384	3.98306	-6.67874
		29	-149.234	93.3595	-324.99	76.3851	-210.059	123.418	-205.462	193.792	-239.703	241.04	-263.762	294.505	-204.754	58.7033	-192.5	-18	-240.149	-51.2376	-280.248	-94.0099	-148.895	93.4273	-325.202	76.1259	-209.302	122.983	-205.315	193.962	-239.472	240.945	-263.353	294.527	-204.447	59.025	-192.928	-18.183	-240.676	-50.5276	-280.826	-93.5538	-4.80706	3.0163	-10.4991	2.45772	-6.7573	3.9705	-6.62857
		30	-143.222	93.3595	-320.393	76.0314	-204.401	123.065	-203.694	194.145	-240.594	238.812	-266.881	289.604	-200.157	58.3497	-191.5	-18.5	-241.04	-48.1188	-284.703	-89.5545	-143.815	92.803	-320.435	76.0198	-204.63	122.362	-203.548	193.737	-240.548	238.644	-267.136	290.527	-200.119	58.6327	-191.657	-18.6233	-241.133	-48.289	-284.469	-89.2066	-4.64306	2.99614	-10.3452	2.4543	-6.60648	3.95044	-6.57154
		31	-138.625	91.945	-316.149	75.6778	-199.804	121.297	-200.864	192.377	-241.485	236.139	-270.446	286.04	-195.206	58.7033	-190.5	-19	-241.485	-45.4455	-287.376	-85.099	-138.741	92.1472	-315.531	75.8054	-199.87	121.511	-201.637	193.514	-241.184	236.092	-270.324	286.327	-195.703	58.2894	-190.259	-18.9201	-241.235	-45.8001	-287.553	-84.361	-4.47926	2.97497	-10.1869	2.44737	-6.45279	3.92299	-6.50985
		32	-134.028	91.2377	-310.138	75.3242	-194.853	120.236	-199.45	193.792	-241.04	233.02	-273.564	282.475	-191.67	57.9961	-189	-19	-240.594	-43.2178	-290.495	-77.9703	-133.673	91.5318	-310.465	75.6098	-195.052	120.608	-199.647	193.318	-241.324	233.355	-272.908	281.898	-191.174	57.914	-188.673	-19.1184	-241.007	-43.1461	-289.975	-79.1229	-4.31563	2.9551	-10.0233	2.44106	-6.29723	3.89382	-6.4456
		33	-128.369	90.8841	-305.54	75.3242	-190.609	119.528	-197.682	193.438	-241.485	230.347	-274.455	277.129	-186.719	57.2888	-186.5	-19.5	-240.149	-40.9901	-290.941	-73.0693	-128.57	90.9976	-305.331	75.5152	-190.167	119.797	-197.465	192.964	-240.968	230.5	-274.927	277.125	-186.423	57.5083	-186.903	-19.2678	-240.502	-40.3257	-291.63	-73.721	-4.15089	2.93785	-9.8576	2.43801	-6.13954	3.86764	-6.37514
		34	-123.065	90.5305	-299.528	75.6778	-185.305	119.175	-195.56	192.731	-240.149	227.673	-276.238	271.782	-181.768	57.2888	-185	-19	-240.149	-36.9802	-293.168	-69.505	-123.455	90.5003	-300.196	75.521	-185.184	119.113	-194.9	192.338	-240.097	227.511	-276.551	272.008	-181.443	57.1037	-185.018	-19.4086	-239.674	-37.3714	-292.487	-68.126	-3.98574	2.9218	-9.69182	2.43819	-5.97865	3.84555	-6.29232
		35	-118.821	90.5305	-295.639	75.3242	-179.646	118.468	-192.024	190.963	-238.366	224.554	-278.02	267.327	-175.756	56.9352	-183	-20	-239.257	-33.8614	-293.614	-61.9307	-118.302	89.9546	-295.118	75.5753	-180.165	118.51	-191.837	191.484	-238.797	224.327	-277.863	266.568	-176.344	56.6971	-183.013	-19.604	-238.4	-34.4492	-292.422	-62.173	-3.81937	2.90418	-9.52787	2.43995	-5.81663	3.82608	-6.19345
		36	-112.809	89.1159	-289.627	75.6778	-175.403	118.114	-188.487	190.963	-237.921	220.99	-279.356	260.644	-171.159	55.8743	-181	-19.5	-236.584	-31.6337	-291.386	-55.6931	-113.014	89.3086	-290.044	75.6372	-175.198	117.939	-188.337	190.53	-237.17	220.929	-278.856	260.817	-171.289	56.3282	-180.854	-19.86	-236.693	-31.6401	-291.498	-55.9606	-3.64865	2.88332	-9.36405	2.44194	-5.65627	3.80766	-6.08044
		37	-108.212	88.4086	-285.383	76.3851	-170.098	117.407	-184.244	188.841	-234.802	217.426	-279.356	254.406	-166.208	55.8743	-179	-20	-233.911	-29.4059	-289.158	-49.901	-107.58	88.6322	-284.978	75.6194	-170.27	117.357	-184.546	189.536	-235.266	217.362	-279.567	254.917	-166.322	56.0761	-178.513	-20.2288	-234.782	-28.8686	-290.079	-49.5954	-3.47321	2.86149	-9.20049	2.44137	-5.49717	3.78885	-5.95806
		38	-101.493	88.055	-279.725	74.9705	-165.501	116.699	-180.354	188.841	-233.02	213.416	-279.802	249.059	-161.611	56.2279	-175.5	-21	-233.02	-25.8416	-288.267	-42.7723	-102.006	87.9716	-279.881	75.4733	-165.375	116.757	-180.64	188.589	-233.255	213.701	-280.149	249.006	-161.415	55.9183	-176.022	-20.6904	-232.873	-26.0547	-288.521	-43.1265	-3.29327	2.84016	-9.03595	2.43665	-5.33913	3.76949	-5.83196
[truncated: 198 more columns]

## Sheet: C0013
			RAW COORDINATES																				SPLINE																				mm
			HEAD		TAIL		LEFT COXAE		LEFT FT		LEFT TT		LEFT TIP		RIGHT COXAE		RIGHT FT		RIGHT TT		RIGHT TIP		HEAD		TAIL		LEFT COXAE		LEFT FT		LEFT TT		LEFT TIP		RIGHT COXAE		RIGHT FT		RIGHT TT		RIGHT TIP		HEAD		TAIL		LEFT COXAE		LEFT FT
SCALE		Frame	X	Y	X	Y	X	Y	X	Y	X	Y	X	Y	X	Y	X	Y	X	Y	X	Y	X	Y	X	Y	X	Y	X	Y	X	Y	X	Y	X	Y	X	Y	X	Y	X	Y	X	Y	X	Y	X	Y	X
X	Y	-2	-292.173	-157.734	-211.902	-314.345	-298.96	-199.158	-333.124	-147.112	-378.655	-116.097	-416.759	-82.7563	-259.921	-169.745	-281.139	-118.821	-286.798	-65.776	-303.418	-14.1454	-292.509	-157.505	-211.673	-314.239	-299.893	-197.916	-332.268	-145.932	-378.646	-113.784	-417.102	-79.0796	-259.915	-169.487	-281.602	-119.244	-287.752	-66.3384	-304.75	-14.9836	-9.44365	-5.08505	-6.83384	-10.1452	-9.68203	-6.38969	-10.7272
-376.181	421.436	-1	-292.173	-157.734	-211.902	-314.345	-298.96	-199.158	-333.124	-147.112	-378.655	-116.097	-416.759	-82.7563	-259.921	-169.745	-281.139	-118.821	-286.798	-65.776	-303.418	-14.1454	-292.509	-157.505	-211.673	-314.239	-299.893	-197.916	-332.268	-145.932	-378.646	-113.784	-417.102	-79.0796	-259.915	-169.487	-281.602	-119.244	-287.752	-66.3384	-304.75	-14.9836	-9.44365	-5.08505	-6.83384	-10.1452	-9.68203	-6.38969	-10.7272
-66.468	425.678	0	-292.173	-157.734	-211.902	-314.345	-298.96	-199.158	-333.124	-147.112	-378.655	-116.097	-416.759	-82.7563	-259.921	-169.745	-281.139	-118.821	-286.798	-65.776	-303.418	-14.1454	-292.509	-157.505	-211.673	-314.239	-299.893	-197.916	-332.268	-145.932	-378.646	-113.784	-417.102	-79.0796	-259.915	-169.487	-281.602	-119.244	-287.752	-66.3384	-304.75	-14.9836	-9.44365	-5.08505	-6.83384	-10.1452	-9.68203	-6.38969	-10.7272
		1	-292.173	-157.734	-211.902	-314.345	-298.96	-199.158	-333.124	-147.112	-378.655	-116.097	-416.759	-82.7563	-259.921	-169.745	-281.139	-118.821	-286.798	-65.776	-303.418	-14.1454	-292.509	-157.505	-211.673	-314.239	-299.893	-197.916	-332.268	-145.932	-378.646	-113.784	-417.102	-79.0796	-259.915	-169.487	-281.602	-119.244	-287.752	-66.3384	-304.75	-14.9836	-9.44365	-5.08505	-6.83384	-10.1452	-9.68203	-6.38969	-10.7272
DISTANCE (mm)		2	-294.979	-158.295	-207.973	-312.1	-300.743	-200.05	-335.953	-150.648	-385.799	-124.829	-427.475	-95.0606	-259.214	-170.806	-281.847	-119.175	-287.859	-66.1297	-304.126	-14.1454	-294.61	-158.494	-208.438	-312.393	-299.884	-200.958	-336.657	-150.433	-385.973	-124.621	-428.023	-94.5495	-259.653	-170.901	-281.924	-119.107	-287.396	-65.7481	-303.775	-12.9056	-9.51146	-5.11697	-6.72941	-10.0856	-9.68173	-6.48792	-10.869
pixel	mm	3	-296.663	-159.418	-206.289	-310.416	-299.851	-203.168	-341.257	-155.599	-392.15	-136.34	-438.192	-110.54	-259.921	-171.866	-282.908	-118.821	-287.151	-65.0688	-303.418	-10.9627	-296.616	-159.549	-205.255	-310.566	-299.605	-204.373	-341.3	-155.349	-393.293	-136.26	-438.795	-111.303	-259.367	-172.396	-282.085	-118.83	-286.74	-64.9876	-302.366	-10.612	-9.57624	-5.15104	-6.62666	-10.0266	-9.67272	-6.59819	-11.0188
309.742	10	4	-298.909	-161.102	-200.676	-308.732	-298.96	-207.624	-345.501	-160.55	-399.691	-147.85	-447.321	-128.004	-259.214	-174.695	-281.847	-118.821	-285.737	-64.0079	-300.589	-8.48723	-298.522	-160.686	-202.13	-308.703	-298.996	-208.259	-346.283	-161.158	-400.495	-149.553	-449.112	-130.699	-258.968	-174.005	-281.95	-118.288	-285.614	-63.978	-300.226	-8.18921	-9.63776	-5.18773	-6.52575	-9.96647	-9.65307	-6.72362	-11.1797
1	0.032285	5	-300.593	-161.663	-199.553	-306.486	-298.069	-213.416	-351.159	-167.269	-407.63	-162.933	-458.831	-149.041	-258.153	-175.756	-281.493	-117.407	-283.969	-62.947	-297.053	-4.59725	-300.373	-161.899	-199.192	-306.699	-298.101	-212.349	-351.604	-168.374	-407.151	-165.287	-458.396	-153.794	-258.48	-175.671	-281.563	-117.386	-283.974	-62.6825	-297.343	-5.89108	-9.69752	-5.22691	-6.43091	-9.90176	-9.62418	-6.85568	-11.3515
		6	-302.277	-163.347	-196.746	-304.802	-297.624	-216.535	-356.464	-176.464	-412.393	-181.588	-466.77	-179.206	-258.153	-177.171	-281.139	-116.346	-282.2	-62.2397	-293.517	-3.88998	-302.319	-163.261	-196.322	-304.434	-296.967	-216.227	-357.051	-177.322	-412.613	-183.731	-465.652	-180.723	-257.995	-177.469	-280.99	-116.155	-281.827	-61.0906	-293.827	-3.98571	-9.76035	-5.27087	-6.33824	-9.82864	-9.58755	-6.98088	-11.5274
LENGTH (mm)		7	-303.96	-164.47	-193.378	-301.996	-295.842	-219.653	-362.829	-185.658	-418.743	-202.227	-472.326	-208.578	-258.153	-178.585	-280.079	-114.931	-279.018	-58.3497	-290.334	-2.12181	-304.58	-164.815	-193.422	-301.763	-295.668	-219.7	-362.234	-187.993	-416.285	-204.401	-469.944	-210.295	-257.555	-179.517	-280.279	-114.668	-279.207	-59.3188	-289.726	-2.45798	-9.83334	-5.32105	-6.24463	-9.74241	-9.54562	-7.093	-11.6947
Body	5.35005	8	-306.767	-166.715	-190.572	-298.628	-293.614	-223.218	-367.426	-199.804	-418.346	-226.836	-473.12	-239.934	-257.092	-181.061	-279.371	-113.163	-276.189	-57.2888	-284.676	-1.76817	-307.343	-166.594	-190.511	-298.627	-294.438	-222.703	-366.639	-199.987	-417.685	-226.066	-470.754	-240.608	-257.253	-181.816	-279.499	-113.061	-276.221	-57.7057	-285.036	-1.17843	-9.92254	-5.37849	-6.15064	-9.64114	-9.50591	-7.18994	-11.8369
R. Femur	2.37867	9	-310.696	-168.399	-187.765	-295.26	-293.614	-225	-370.255	-213.949	-416.759	-249.857	-468.754	-276.053	-257.092	-184.951	-278.664	-110.334	-272.652	-56.5815	-279.371	-0.353635	-310.618	-168.563	-187.623	-295.038	-293.539	-225.207	-369.898	-212.314	-416.918	-246.922	-468.302	-269.245	-257.318	-184.095	-278.675	-111.544	-272.953	-56.4105	-279.854	0.0309485	-10.0283	-5.44204	-6.05741	-9.5253	-9.47691	-7.27079	-11.9421
R. Tibia	1.71571	10	-314.064	-170.644	-185.52	-291.331	-293.168	-227.228	-373.084	-225.972	-415.568	-268.908	-462.404	-297.089	-257.092	-187.073	-277.603	-109.98	-269.47	-55.167	-274.42	1.0609	-314.256	-170.684	-184.814	-291.038	-293.063	-227.286	-371.875	-223.903	-414.369	-265.385	-463.509	-293.923	-257.965	-185.908	-277.791	-110.297	-269.452	-55.4521	-274.201	1.21106	-10.1458	-5.51054	-5.9667	-9.39616	-9.46151	-7.33792	-12.006
R. Tarsus	1.69337	11	-318.555	-172.89	-182.152	-286.84	-292.723	-228.564	-372.731	-234.813	-409.217	-280.816	-456.45	-315.347	-259.214	-187.073	-276.896	-109.627	-265.58	-54.8134	-268.409	2.12181	-318.08	-172.89	-182.213	-286.734	-293.073	-228.994	-372.63	-234.159	-410.494	-280.781	-457.469	-314.051	-259.297	-187.025	-276.809	-109.213	-265.698	-54.8486	-267.981	2.2732	-10.2692	-5.58174	-5.88274	-9.25719	-9.46183	-7.39307	-12.0304
L. Femur	2.44159	12	-321.923	-174.574	-179.906	-281.788	-293.168	-230.792	-372.024	-242.947	-405.645	-294.311	-449.305	-329.636	-261.69	-187.426	-276.189	-108.919	-261.69	-54.4597	-260.982	3.18271	-321.9	-175.092	-180.117	-282.317	-293.644	-230.335	-372.526	-243.093	-405.94	-293.409	-450.993	-330.22	-261.202	-187.535	-275.654	-108.066	-261.648	-54.5608	-261.143	3.06405	-10.3925	-5.65282	-5.81508	-9.1146	-9.48027	-7.43635	-12.027
L. Tibia	1.78342	13	-326.414	-177.38	-178.222	-277.859	-295.396	-231.238	-371.67	-250.373	-400.485	-302.646	-444.146	-342.337	-263.458	-187.073	-274.42	-107.151	-257.8	-54.8134	-253.91	3.88998	-325.626	-177.17	-178.837	-277.992	-294.75	-231.236	-371.985	-250.97	-401.112	-303.827	-444.502	-343.465	-263.525	-187.595	-274.29	-106.757	-257.24	-54.5195	-253.739	3.39398	-10.5128	-5.71994	-5.77373	-8.97497	-9.51598	-7.46544	-12.0095
L. Tarsus	1.6947	14	-329.22	-179.064	-178.222	-273.929	-296.287	-231.683	-370.963	-257.446	-395.722	-312.172	-437.398	-354.245	-266.287	-187.426	-272.299	-103.969	-252.495	-55.167	-245.422	2.47544	-329.246	-178.901	-178.595	-273.839	-296.272	-231.706	-371.307	-258.028	-396.245	-312.732	-437.954	-354.695	-266.215	-187.313	-272.814	-105.427	-252.444	-54.6474	-245.818	3.11999	-10.6297	-5.77582	-5.76592	-8.84089	-9.56513	-7.48062	-11.9876
		15	-332.588	-180.187	-179.345	-270	-298.069	-231.683	-370.609	-265.226	-391.356	-319.713	-431.444	-363.374	-269.47	-186.719	-271.238	-104.676	-247.191	-54.8134	-238.35	2.82908	-332.924	-180.086	-179.442	-269.884	-298.214	-231.778	-370.669	-264.326	-391.378	-320.573	-431.096	-364.503	-269.239	-186.677	-271.357	-104.27	-247.362	-54.9576	-237.435	2.18218	-10.7484	-5.81408	-5.79327	-8.7132	-9.62783	-7.48295	-11.967
mg	14	16	-336.518	-180.748	-181.59	-266.071	-301.188	-230.792	-370.255	-269.116	-387.387	-327.652	-425.094	-372.9	-272.299	-185.658	-270.53	-103.969	-242.24	-55.8743	-228.094	0.353635	-336.848	-180.583	-181.304	-266.172	-300.611	-231.476	-370.149	-269.808	-386.401	-327.555	-423.552	-373.253	-272.587	-185.672	-269.93	-103.196	-242.131	-55.5903	-228.616	0.438746	-10.8751	-5.83012	-5.85338	-8.59335	-9.70523	-7.47318	-11.9502
		17	-341.57	-180.748	-183.836	-262.141	-302.97	-231.683	-369.902	-274.067	-380.639	-332.811	-414.774	-380.838	-276.542	-184.597	-268.409	-101.847	-236.582	-56.2279	-220.314	-2.12181	-341.105	-180.291	-184.079	-262.773	-303.499	-230.759	-369.799	-274.551	-381.22	-333.661	-415.078	-381.006	-276.291	-184.301	-268.523	-102.167	-236.858	-56.6983	-219.547	-2.14622	-11.0126	-5.82068	-5.94299	-8.48363	-9.79845	-7.45004	-11.9389
		18	-344.938	-179.626	-187.765	-259.896	-306.98	-229.901	-368.841	-279.018	-375.877	-338.765	-405.645	-387.585	-280.432	-182.122	-266.994	-100.786	-232.338	-58.3497	-209.705	-6.71906	-345.719	-179.177	-187.713	-259.707	-307.006	-229.481	-369.696	-278.499	-375.933	-338.797	-405.785	-387.668	-280.344	-182.58	-267.25	-101.326	-231.65	-58.4644	-210.387	-5.58987	-11.1615	-5.78474	-6.06031	-8.38463	-9.91167	-7.40877	-11.9356
		19	-351.112	-176.819	-192.256	-257.089	-310.99	-227.228	-369.902	-282.2	-370.717	-343.131	-396.516	-392.745	-284.676	-180.354	-266.287	-100.432	-226.68	-60.4715	-201.572	-8.84086	-350.751	-177.35	-192.114	-256.852	-311.172	-227.689	-369.898	-281.473	-370.561	-342.683	-395.794	-393.084	-284.786	-180.57	-266.218	-100.758	-226.595	-60.9736	-201.402	-9.97276	-11.324	-5.72575	-6.20238	-8.29247	-10.0462	-7.35092	-11.9421
		20	-356.164	-175.135	-197.308	-253.721	-315.891	-225.446	-370.963	-283.261	-365.954	-346.307	-384.609	-397.111	-289.627	-178.939	-265.933	-100.786	-222.083	-65.0688	-193.084	-15.2063	-356.136	-175.015	-197.195	-254.109	-315.989	-225.553	-370.276	-283.431	-365.085	-345.005	-385.22	-397.05	-289.683	-178.227	-265.474	-100.385	-221.927	-64.2297	-192.757	-15.567	-11.4978	-5.65034	-6.36644	-8.20391	-10.2017	-7.28197	-11.9544
		21	-361.778	-171.767	-202.36	-251.476	-321.683	-223.218	-370.963	-284.322	-359.603	-345.513	-375.083	-399.89	-294.931	-175.403	-264.519	-100.786	-217.839	-67.5442	-184.951	-22.279	-361.845	-172.287	-202.914	-251.421	-321.405	-223.157	-370.692	-284.51	-359.567	-345.626	-374.296	-399.283	-295.08	-175.477	-265.09	-100.051	-217.947	-68.1633	-184.636	-22.4305	-11.6821	-5.56229	-6.55108	-8.11711	-10.3765	-7.20461	-11.9678
		22	-368.514	-169.522	-209.657	-248.669	-327.056	-220.088	-371.316	-285.029	-353.649	-344.322	-363.572	-400.287	-300.589	-172.574	-265.933	-99.3713	-214.303	-72.4951	-177.525	-30.7662	-367.874	-169.252	-209.229	-248.658	-327.345	-220.535	-371.177	-284.845	-354.282	-344.724	-363.204	-399.531	-300.991	-172.387	-265.218	-99.7116	-214.992	-72.8321	-177.323	-30.4662	-11.8768	-5.46431	-6.75495	-8.0279	-10.5683	-7.11997	-11.9834
		23	-373.565	-166.154	-215.832	-245.863	-333.804	-217.707	-371.316	-283.969	-349.283	-342.337	-351.665	-397.508	-308.016	-168.33	-265.58	-99.0177	-213.595	-78.1532	-171.159	-38.8998	-374.242	-165.898	-216.002	-245.682	-333.781	-217.707	-371.873	-284.525	-349.521	-342.5	-352.292	-397.725	-307.374	-169.062	-265.942	-99.4937	-213.341	-78.1819	-171.205	-39.5389	-12.0824	-5.356	-6.97362	-7.93183	-10.7761	-7.02865	-12.0059
		24	-380.863	-162.225	-223.69	-243.056	-340.551	-215.325	-373.084	-282.908	-344.917	-339.162	-341.345	-394.333	-314.028	-166.208	-267.348	-99.725	-212.181	-83.4578	-165.501	-49.8625	-381.071	-162.258	-223.152	-242.372	-340.632	-214.591	-372.939	-283.641	-345.424	-339.051	-342	-393.992	-314.121	-165.602	-267.459	-99.4616	-213.128	-84.0443	-166.73	-49.537	-12.3028	-5.23849	-7.20446	-7.82498	-10.9973	-6.92805	-12.0403
		25	-388.721	-158.295	-230.426	-238.565	-347.696	-210.959	-374.145	-283.261	-343.33	-334.399	-333.01	-388.379	-321.1	-161.611	-269.823	-99.3713	-214.656	-90.8841	-164.794	-60.1179	-388.351	-158.438	-230.615	-238.687	-347.805	-211.123	-374.42	-282.125	-342.011	-334.419	-332.606	-388.469	-321.243	-161.986	-269.918	-99.5671	-214.449	-90.1924	-164.279	-60.2388	-12.5379	-5.11517	-7.44539	-7.70601	-11.2289	-6.81609	-12.0881
		26	-396.019	-154.366	-237.723	-234.636	-356.031	-207.784	-376.267	-280.432	-338.567	-329.239	-323.484	-381.632	-328.173	-158.428	-273.006	-99.725	-217.132	-96.5422	-162.672	-70.7269	-396.011	-154.544	-238.427	-234.746	-355.179	-207.398	-376.35	-279.776	-339.246	-328.661	-324.232	-381.356	-328.759	-158.268	-273.414	-99.7834	-217.212	-96.3033	-163.976	-71.4537	-12.7852	-4.98945	-7.69759	-7.57875	-11.4669	-6.69582	-12.1505
		27	-403.877	-150.437	-246.705	-230.707	-362.381	-203.021	-378.743	-276.896	-336.979	-321.698	-317.53	-372.503	-337.367	-154.538	-277.25	-99.725	-221.729	-102.2	-166.562	-84.5187	-404.051	-150.635	-246.573	-230.67	-362.657	-203.535	-378.702	-276.647	-337.329	-321.868	-317.006	-372.868	-336.614	-154.459	-277.993	-100.051	-221.313	-102.192	-165.921	-82.9406	-13.0448	-4.86326	-7.96058	-7.44717	-11.7084	-6.57111	-12.2264
		28	-411.736	-147.069	-255.686	-226.216	-369.923	-199.052	-381.572	-272.652	-336.185	-314.553	-310.386	-363.771	-344.44	-150.295	-283.615	-100.432	-226.326	-107.505	-168.684	-92.6523	-412.483	-146.712	-254.874	-226.553	-370.31	-199.705	-381.417	-273.019	-336.358	-314.252	-310.943	-363.253	-344.657	-150.591	-283.562	-100.267	-226.667	-107.766	-169.983	-94.3755	-13.317	-4.7366	-8.22859	-7.31426	-11.9555	-6.44746	-12.314
		29	-421.84	-142.578	-262.983	-222.848	-378.258	-196.273	-385.108	-267.701	-336.582	-305.821	-306.417	-352.26	-352.574	-146.758	-290.688	-100.432	-233.399	-112.809	-177.525	-106.444	-421.239	-142.74	-263.189	-222.472	-378.176	-195.945	-384.45	-269.246	-336.303	-306.039	-306.102	-352.726	-352.862	-146.706	-289.835	-100.261	-233.258	-112.937	-176.028	-105.655	-13.5997	-4.60835	-8.49703	-7.1825	-12.2094	-6.32609	-12.4119
		30	-430.26	-138.649	-271.965	-217.796	-386.593	-192.304	-387.23	-266.287	-337.376	-297.486	-302.448	-341.147	-361.415	-142.868	-296.699	-99.725	-239.764	-117.76	-182.475	-116.346	-430.105	-138.744	-271.555	-218.449	-386.192	-192.134	-387.83	-265.524	-337.092	-297.497	-302.461	-341.568	-361.181	-142.786	-296.546	-99.8911	-241.023	-117.548	-183.745	-116.418	-13.8859	-4.47934	-8.76715	-7.05262	-12.4682	-6.20305	-12.5211
		31	-438.68	-134.719	-279.262	-214.99	-394.135	-188.335	-392.534	-261.69	-339.361	-288.754	-300.86	-329.636	-369.902	-138.978	-303.418	-99.0177	-250.02	-121.65	-193.084	-126.248	-438.969	-134.728	-280.035	-214.537	-394.313	-188.198	-391.711	-261.723	-338.721	-288.865	-300.04	-329.963	-369.499	-138.813	-303.636	-99.0538	-249.843	-121.41	-193.024	-126.38	-14.1721	-4.34969	-9.0409	-6.92632	-12.7304	-6.07596	-12.6464
		32	-448.222	-130.79	-288.243	-210.499	-402.073	-184.366	-396.071	-257.8	-340.948	-280.419	-298.875	-319.713	-377.328	-134.735	-311.552	-97.9568	-259.921	-123.772	-204.047	-135.088	-447.774	-130.664	-288.726	-210.687	-402.583	-184.126	-396.196	-257.792	-341.306	-280.359	-298.919	-317.952	-377.762	-134.8	-311.115	-97.6158	-259.328	-124.389	-203.548	-135.278	-14.4564	-4.21848	-9.3215	-6.802	-12.9974	-5.94452	-12.7912
		33	-456.642	-126.861	-297.786	-207.131	-411.202	-180	-401.375	-253.91	-345.314	-272.481	-299.272	-305.821	-386.523	-130.845	-318.271	-95.835	-269.47	-126.601	-214.656	-143.222	-456.429	-126.524	-297.548	-206.904	-410.996	-179.965	-401.532	-253.721	-345.101	-272.172	-299.361	-305.577	-385.997	-130.8	-318.978	-95.4457	-269.092	-126.383	-214.974	-142.804	-14.7358	-4.08483	-9.60631	-6.67989	-13.269	-5.81018	-12.9634
		34	-464.501	-121.809	-306.767	-203.202	-419.934	-175.237	-406.68	-250.373	-348.886	-264.146	-301.257	-294.708	-393.949	-126.601	-326.758	-92.6523	-279.371	-126.955	-226.68	-148.173	-464.942	-122.328	-306.279	-203.192	-419.435	-175.825	-407.976	-249.508	-350.328	-264.524	-301.661	-293.279	-394.184	-126.861	-327.268	-92.5094	-278.915	-127.176	-227.056	-148.623	-15.0106	-3.94934	-9.88819	-6.56003	-13.5414	-5.67649	-13.1715
		35	-473.482	-118.441	-315.748	-198.711	-427.475	-172.062	-415.167	-244.361	-357.222	-256.604	-305.226	-279.625	-402.083	-122.711	-336.66	-88.055	-287.859	-128.016	-239.764	-152.77	-473.37	-118.148	-314.752	-199.593	-427.826	-171.801	-415.669	-245.243	-357.157	-257.685	-306.071	-281.732	-402.383	-123.024	-335.861	-88.8893	-288.724	-126.553	-239.484	-152.46	-15.2827	-3.81441	-10.1617	-6.44384	-13.8124	-5.5466	-13.4198
		36	-481.902	-113.95	-322.484	-196.466	-436.207	-167.696	-425.069	-240.825	-365.16	-251.841	-310.783	-269.702	-410.923	-119.528	-345.147	-85.2259	-298.821	-124.833	-252.141	-155.953	-481.688	-113.976	-322.982	-196.117	-436.203	-167.876	-424.418	-241.176	-365.444	-251.798	-312.694	-271.834	-410.616	-119.256	-344.523	-84.6749	-298.519	-124.345	-251.861	-153.978	-15.5513	-3.67972	-10.4274	-6.33162	-14.0828	-5.41988	-13.7023
		37	-490.322	-109.459	-330.904	-193.098	-444.939	-163.727	-434.263	-236.935	-375.083	-246.284	-321.499	-262.558	-419.057	-115.992	-352.574	-80.275	-308.723	-120.943	-265.226	-155.599	-489.883	-109.839	-331.209	-192.591	-444.546	-164.046	-433.883	-237.384	-374.963	-246.738	-321.311	-263.959	-418.84	-115.452	-353.208	-79.8051	-308.15	-120.73	-263.845	-152.997	-15.8159	-3.54616	-10.6931	-6.21781	-14.3521	-5.29622	-14.0079
		38	-497.058	-106.091	-338.763	-189.168	-452.481	-160.948	-442.75	-234.46	-384.212	-242.315	-331.819	-257.398	-426.483	-111.041	-361.768	-74.9705	-317.917	-116.346	-275.835	-148.88	-498.024	-105.753	-339.602	-188.904	-452.839	-160.263	-443.859	-233.788	-385.431	-242.303	-331.231	-257.8	-427.077	-111.583	-362.022	-74.3235	-317.516	-116.094	-275.256	-149.952	-16.0787	-3.41424	-10.964	-6.09875	-14.6199	-5.17407	-14.33
		39	-506.601	-101.601	-348.867	-184.678	-461.213	-156.185	-455.481	-230.216	-398.501	-239.14	-343.33	-255.413	-435.678	-107.859	-371.316	-67.1906	-326.051	-109.273	-285.029	-143.222	-506.235	-101.664	-348.181	-185.09	-461.138	-156.433	-454.208	-230.227	-396.51	-238.192	-341.731	-252.584	-435.381	-107.728	-370.948	-68.4492	-326.687	-110.913	-286.274	-145.925	-16.3438	-3.28223	-11.241	-5.97563	-14.8878	-5.05044	-14.6641
[truncated: 198 more columns]

## Sheet: C0015
			RAW COORDINATES																				SPLINE																				mm
			HEAD		TAIL		LEFT COXAE		LEFT FT		LEFT TT		LEFT TIP		RIGHT COXAE		RIGHT FT		RIGHT TT		RIGHT TIP		HEAD		TAIL		LEFT COXAE		LEFT FT		LEFT TT		LEFT TIP		RIGHT COXAE		RIGHT FT		RIGHT TT		RIGHT TIP		HEAD		TAIL		LEFT COXAE		LEFT FT
SCALE		Frame	X	Y	X	Y	X	Y	X	Y	X	Y	X	Y	X	Y	X	Y	X	Y	X	Y	X	Y	X	Y	X	Y	X	Y	X	Y	X	Y	X	Y	X	Y	X	Y	X	Y	X	Y	X	Y	X	Y	X
X	Y	-2	-47.0334	-84.5187	-119.844	75.7796	-36.7672	-39.8545	3.64865	-89.8129	54.1061	-117.053	99.6362	-151.559	-92.9002	-48.8358	-100.759	-126.299	-151.04	-154.604	-195.594	-188.465	-46.8337	-84.5215	-119.609	75.9121	-36.4834	-39.6089	3.3715	-89.8335	54.1668	-117.105	99.4437	-151.835	-93.1434	-48.6945	-101.034	-126.152	-150.484	-154.413	-195.407	-187.774	-1.51202	-2.72877	-3.86157	2.45082	-1.17786	-1.27877	0.108849
-376.181	421.436	-1	-47.0334	-84.5187	-119.844	75.7796	-36.7672	-39.8545	3.64865	-89.8129	54.1061	-117.053	99.6362	-151.559	-92.9002	-48.8358	-100.759	-126.299	-151.04	-154.604	-195.594	-188.465	-46.8337	-84.5215	-119.609	75.9121	-36.4834	-39.6089	3.3715	-89.8335	54.1668	-117.105	99.4437	-151.835	-93.1434	-48.6945	-101.034	-126.152	-150.484	-154.413	-195.407	-187.774	-1.51202	-2.72877	-3.86157	2.45082	-1.17786	-1.27877	0.108849
-66.468	425.678	0	-47.0334	-84.5187	-119.844	75.7796	-36.7672	-39.8545	3.64865	-89.8129	54.1061	-117.053	99.6362	-151.559	-92.9002	-48.8358	-100.759	-126.299	-151.04	-154.604	-195.594	-188.465	-46.8337	-84.5215	-119.609	75.9121	-36.4834	-39.6089	3.3715	-89.8335	54.1668	-117.105	99.4437	-151.835	-93.1434	-48.6945	-101.034	-126.152	-150.484	-154.413	-195.407	-187.774	-1.51202	-2.72877	-3.86157	2.45082	-1.17786	-1.27877	0.108849
		1	-47.0334	-84.5187	-119.844	75.7796	-36.7672	-39.8545	3.64865	-89.8129	54.1061	-117.053	99.6362	-151.559	-92.9002	-48.8358	-100.759	-126.299	-151.04	-154.604	-195.594	-188.465	-46.8337	-84.5215	-119.609	75.9121	-36.4834	-39.6089	3.3715	-89.8335	54.1668	-117.105	99.4437	-151.835	-93.1434	-48.6945	-101.034	-126.152	-150.484	-154.413	-195.407	-187.774	-1.51202	-2.72877	-3.86157	2.45082	-1.17786	-1.27877	0.108849
DISTANCE (mm)		2	-46.3261	-85.2259	-117.037	75.7796	-36.2058	-39.2931	5.89397	-90.3742	55.5206	-116.346	100.759	-151.559	-92.9002	-47.7131	-103.004	-125.738	-151.485	-151.931	-197.822	-184.01	-46.8238	-85.425	-117.711	76.0365	-36.2713	-39.6212	5.58488	-89.8722	56.1436	-117.278	101.427	-151.512	-92.8532	-48.1065	-102.484	-126.116	-152.448	-152.585	-198.523	-184.702	-1.5117	-2.75794	-3.8003	2.45484	-1.17102	-1.27917	0.180308
pixel	mm	3	-47.0334	-86.6405	-116.476	76.9023	-35.6445	-39.2931	6.4553	-89.2516	58.3497	-118.114	104.127	-151.559	-92.9002	-48.2744	-104.127	-126.299	-154.604	-151.485	-201.832	-181.337	-46.8531	-86.3164	-115.855	76.1022	-36.1508	-39.6975	7.90856	-89.932	58.0652	-117.382	103.437	-151.1	-92.484	-47.5439	-103.872	-126.109	-154.545	-150.784	-201.663	-181.823	-1.51265	-2.78672	-3.74036	2.45696	-1.16713	-1.28163	0.255327
309.742	10	4	-47.0334	-87.3477	-114.231	75.7796	-36.2058	-39.8545	9.82328	-89.8129	60.8251	-117.76	105.811	-150.437	-92.3389	-47.1518	-104.688	-125.738	-156.832	-148.812	-205.396	-179.109	-46.8594	-87.1572	-113.964	76.0375	-36.1706	-39.806	10.4409	-90.1086	59.7529	-117.179	105.391	-150.543	-91.9905	-46.9849	-105.264	-126.085	-156.694	-148.93	-204.701	-179.148	-1.51285	-2.81387	-3.67934	2.45487	-1.16777	-1.28514	0.337084
1	0.032285	5	-47.0334	-87.3477	-111.424	75.7796	-36.2058	-40.4158	14.3139	-90.9356	61.5324	-117.053	106.933	-149.875	-91.2162	-46.0291	-106.933	-126.299	-159.505	-147.03	-208.069	-177.327	-46.803	-87.9808	-112.083	75.921	-36.2642	-39.8085	12.9375	-90.3566	61.1166	-116.577	107.345	-149.889	-91.4428	-46.5584	-106.781	-126	-158.785	-147.059	-207.553	-176.54	-1.51103	-2.84046	-3.61858	2.45111	-1.17079	-1.28522	0.417688
		6	-46.3261	-89.4695	-110.301	75.7796	-36.2058	-40.4158	15.9979	-90.3742	61.5324	-115.285	109.179	-148.753	-90.0936	-46.0291	-108.617	-126.299	-160.842	-145.248	-208.96	-173.762	-46.7059	-88.8464	-110.308	75.8107	-36.3417	-39.589	15.0115	-90.5587	62.3456	-115.679	109.466	-149.185	-90.9995	-46.4423	-108.44	-125.762	-160.778	-145.214	-210.324	-173.868	-1.5079	-2.8684	-3.56128	2.44755	-1.17329	-1.27813	0.484645
LENGTH (mm)		7	-47.0334	-89.4695	-108.617	75.7796	-37.3285	-37.0478	17.1206	-90.3742	63.6542	-114.224	110.863	-148.191	-91.2162	-47.1518	-109.74	-125.177	-162.624	-143.465	-213.416	-170.644	-46.6302	-89.7164	-108.607	75.7165	-36.2942	-39.2164	16.6046	-90.7006	63.7366	-114.708	111.836	-148.443	-90.7374	-46.6819	-110.268	-125.353	-162.809	-143.43	-213.2	-171.169	-1.50545	-2.89649	-3.50636	2.4445	-1.17176	-1.2661	0.53608
Body	5.35005	8	-46.3261	-90.1768	-106.933	75.2183	-35.6445	-40.4158	17.1206	-91.4969	65.0688	-113.87	115.915	-148.191	-90.0936	-46.5904	-112.547	-124.615	-163.96	-140.792	-216.535	-168.861	-46.5886	-90.6439	-106.908	75.6372	-36.037	-38.8577	17.9855	-90.7408	65.4232	-113.795	114.395	-147.566	-90.5445	-47.2267	-112.31	-124.886	-165.054	-141.749	-216.103	-168.472	-1.50411	-2.92644	-3.45151	2.44194	-1.16345	-1.25452	0.58066
R. Femur	2.37867	9	-46.3261	-92.2986	-105.249	75.7796	-35.6445	-39.2931	18.8046	-90.3742	66.8369	-112.102	116.476	-145.946	-91.2162	-47.7131	-114.231	-124.054	-167.97	-140.792	-219.653	-165.743	-46.6479	-91.6355	-105.143	75.5603	-35.6875	-38.3271	19.5449	-90.5965	67.4549	-112.949	116.932	-146.412	-90.3402	-48.0729	-114.518	-124.447	-167.595	-140.168	-218.95	-165.704	-1.50602	-2.95845	-3.39454	2.43946	-1.15217	-1.23739	0.631005
R. Tibia	1.71571	10	-47.0334	-92.2986	-103.565	75.7796	-35.0832	-37.0478	20.4886	-89.8129	70.3733	-112.809	119.283	-145.385	-90.0936	-49.3971	-117.037	-124.054	-170.198	-138.564	-220.99	-162.624	-46.8209	-92.6163	-103.258	75.3955	-35.3308	-37.7208	21.4674	-90.3235	69.7629	-112.119	119.5	-144.935	-90.0184	-49.0802	-116.849	-124.03	-170.274	-138.507	-221.805	-162.852	-1.51161	-2.99011	-3.33366	2.43414	-1.14065	-1.21782	0.693075
R. Tarsus	1.69337	11	-47.0334	-94.4204	-101.32	75.2183	-35.0832	-36.4865	24.9792	-90.9356	72.1415	-111.395	122.089	-143.701	-89.5322	-50.5198	-119.844	-124.054	-174.208	-136.337	-224.554	-160.396	-47.0454	-93.6159	-101.237	75.0996	-35.0063	-37.4009	23.669	-89.9419	72.1542	-111.105	122.12	-143.048	-89.6486	-50.01	-119.222	-123.528	-172.957	-136.677	-224.871	-159.921	-1.51886	-3.02239	-3.26845	2.42459	-1.13018	-1.20749	0.764153
L. Femur	2.44159	12	-47.7407	-93.7132	-98.5135	74.0956	-34.5218	-37.6091	24.4179	-88.6902	74.6169	-109.627	125.457	-140.333	-88.9709	-51.6424	-121.528	-122.931	-175.099	-135.446	-228.564	-155.941	-47.2883	-94.6752	-99.1494	74.7344	-34.6999	-37.5815	25.878	-89.4	74.5376	-109.836	124.738	-140.774	-89.3591	-50.7029	-121.616	-122.843	-175.581	-134.616	-228.188	-156.894	-1.5267	-3.05658	-3.20103	2.4128	-1.12029	-1.21332	0.835469
L. Tibia	1.78342	13	-47.0334	-95.835	-97.3909	74.0956	-34.5218	-38.1705	30.0312	-89.8129	77.0923	-108.566	127.141	-137.526	-88.9709	-50.5198	-123.212	-121.247	-177.327	-132.327	-231.238	-154.158	-47.5509	-95.9433	-97.0601	74.374	-34.3911	-38.2358	27.9801	-88.8009	76.8572	-108.328	127.32	-138.284	-89.235	-51.184	-124.153	-122.007	-178.331	-132.235	-231.701	-153.793	-1.53518	-3.09752	-3.13358	2.40116	-1.11032	-1.23444	0.903335
L. Tarsus	1.6947	14	-48.4479	-97.9568	-95.1455	74.657	-34.5218	-38.7318	29.4699	-87.0062	79.5678	-106.798	128.825	-135.842	-89.5322	-51.6424	-127	-122	-181.782	-129.208	-235.248	-151.04	-47.9062	-97.3931	-94.9167	73.9405	-34.031	-39.2886	29.7216	-88.2006	79.0874	-106.581	129.982	-135.643	-89.2531	-51.6801	-126.919	-121.054	-181.3	-129.619	-235.398	-150.476	-1.54665	-3.14433	-3.06438	2.38717	-1.09869	-1.26843	0.95956
		15	-47.7407	-98.664	-92.3389	73.5343	-33.3992	-41.5385	30.5925	-87.5676	80.6287	-104.676	133.877	-133.597	-89.5322	-51.6424	-129.653	-119.851	-183.564	-127.426	-239.257	-146.584	-48.3667	-98.9507	-92.7179	73.2981	-33.6174	-40.6204	31.2127	-87.7754	81.2865	-104.649	132.778	-132.733	-89.325	-52.3198	-129.79	-119.908	-184.355	-126.894	-239.172	-146.859	-1.56152	-3.19462	-2.99339	2.36643	-1.08534	-1.31143	1.0077
mg	14	16	-49.1552	-100.079	-90.6549	71.8503	-32.8378	-42.0998	32.8378	-88.1289	83.4578	-102.2	135	-129.106	-88.9709	-53.3264	-133.663	-118.515	-188.911	-123.416	-243.267	-143.02	-49.0026	-100.647	-90.5108	72.469	-33.2531	-42.0347	32.5872	-87.4789	83.5969	-102.65	135.551	-129.487	-89.4215	-53.1479	-132.598	-118.658	-187.371	-124.131	-242.865	-142.99	-1.58205	-3.24937	-2.92214	2.33966	-1.07358	-1.35709	1.05208
		17	-49.1552	-102.908	-88.4096	71.8503	-33.3992	-43.2225	33.9605	-87.0062	85.5796	-100.432	138.368	-125.738	-89.5322	-53.8877	-134.554	-117.178	-189.802	-121.188	-245.941	-138.564	-49.7826	-102.447	-88.2785	71.5339	-32.9965	-43.513	33.8397	-87.188	86.0325	-100.694	138.296	-126.022	-89.5503	-54.0658	-135.21	-117.425	-190.158	-121.456	-246.349	-138.889	-1.60723	-3.3075	-2.85007	2.30947	-1.06529	-1.40482	1.09251
		18	-51.277	-105.029	-86.1642	70.1663	-32.2765	-45.4678	35.0832	-87.0062	88.7623	-99.0177	141.175	-121.809	-90.0936	-56.1331	-137.673	-116.733	-192.475	-118.96	-250.842	-135	-50.6396	-104.2	-86.0226	70.4657	-32.8229	-45.0867	34.9932	-86.9032	88.5143	-98.7783	140.95	-122.399	-89.6288	-54.9667	-137.686	-116.283	-192.809	-118.849	-249.569	-134.548	-1.6349	-3.36409	-2.77723	2.27498	-1.05969	-1.45562	1.12975
		19	-51.9843	-105.737	-83.3576	69.605	-32.8378	-46.5904	36.2058	-87.0062	90.8841	-96.5422	143.981	-120.125	-89.5322	-55.5717	-140.792	-114.505	-195.594	-116.287	-251.733	-129.653	-51.4099	-105.872	-83.7899	69.2569	-32.7445	-46.7466	36.1167	-86.6265	90.8677	-96.8276	143.449	-118.565	-89.5712	-55.7795	-139.999	-115.266	-195.401	-116.197	-252.474	-129.915	-1.65976	-3.41807	-2.70515	2.23595	-1.05715	-1.50921	1.16603
		20	-51.277	-107.151	-81.6736	67.3597	-32.8378	-48.2744	36.7672	-85.3222	93.0059	-95.1277	145.665	-113.95	-89.5322	-56.1331	-141.683	-114.505	-197.376	-113.614	-254.851	-125.644	-52.0697	-107.633	-81.6423	67.87	-32.6785	-48.5444	37.3111	-86.394	92.9492	-94.7916	145.81	-114.403	-89.3924	-56.6724	-142.127	-114.454	-197.931	-113.403	-255.231	-125.004	-1.68107	-3.47493	-2.63582	2.19118	-1.05502	-1.56725	1.20459
		21	-53.3988	-109.273	-79.9896	66.7983	-32.8378	-50.5198	38.4511	-87.0062	95.835	-93.3595	147.349	-110.021	-88.9709	-57.817	-143.911	-113.614	-200.495	-110.495	-257.97	-119.406	-52.7154	-109.643	-79.5543	66.3006	-32.5414	-50.5027	38.6721	-86.2725	94.6362	-92.5874	148.178	-110.09	-89.1326	-57.8022	-144.2	-113.782	-200.387	-110.405	-257.893	-119.834	-1.70191	-3.53981	-2.56841	2.14051	-1.0506	-1.63048	1.24853
		22	-52.6916	-112.102	-77.183	64.553	-32.2765	-53.3264	40.1351	-86.4449	95.4813	-89.4695	150.156	-104.969	-88.9709	-58.9397	-146.584	-114.059	-202.723	-107.376	-260.644	-114.059	-53.3357	-111.924	-77.5077	64.4767	-32.3074	-52.5758	40.1658	-86.1513	95.8866	-90.2348	150.645	-105.782	-88.8518	-59.1941	-146.276	-113.147	-202.651	-107.201	-260.391	-114.527	-1.72194	-3.61345	-2.50233	2.08163	-1.04304	-1.69741	1.29675
		23	-54.1061	-114.931	-75.499	62.3077	-32.2765	-53.8877	42.3805	-85.8836	96.5422	-87.7014	153.524	-101.04	-88.4096	-61.185	-147.475	-111.832	-204.95	-103.812	-262.426	-109.604	-53.9926	-114.4	-75.5654	62.4139	-32.0241	-54.749	41.6771	-86.0403	96.9072	-87.9024	153.086	-101.551	-88.5885	-60.8324	-148.342	-112.461	-204.602	-103.83	-262.665	-109.119	-1.74315	-3.69338	-2.43963	2.01503	-1.0339	-1.76757	1.34554
		24	-54.8134	-116.346	-73.815	60.0624	-31.1538	-57.2557	42.3805	-85.3222	97.9568	-85.9332	155.769	-98.7942	-88.4096	-62.3077	-151.04	-111.832	-206.287	-100.248	-263.762	-103.366	-54.6479	-117.043	-73.7383	60.1668	-31.7627	-57.1283	43.1108	-86.0477	97.8608	-85.6196	155.24	-97.2534	-88.3886	-62.6648	-150.39	-111.796	-206.161	-100.374	-264.703	-103.545	-1.76431	-3.77872	-2.38064	1.94248	-1.02546	-1.84438	1.39183
		25	-54.8134	-119.882	-72.131	57.817	-31.1538	-60.6237	44.6258	-86.4449	98.3104	-83.1041	156.892	-92.6195	-87.8482	-65.1143	-152.822	-111.386	-207.178	-97.1287	-267.327	-98.0198	-55.2624	-119.916	-72.0082	57.7644	-31.6156	-59.6759	44.4868	-86.2221	98.811	-83.3452	156.95	-92.6722	-88.2661	-64.6839	-152.269	-111.136	-207.338	-96.9159	-266.4	-97.8135	-1.78414	-3.87148	-2.32478	1.86492	-1.02071	-1.92663	1.43625
		26	-56.2279	-123.418	-70.447	55.0104	-32.2765	-61.185	46.3098	-87.0062	99.725	-81.336	158.576	-87.5676	-88.4096	-66.7983	-153.267	-110.941	-208.96	-93.1188	-268.663	-91.7822	-55.815	-122.953	-70.3776	55.2094	-31.5268	-62.3873	45.7083	-86.4536	99.7948	-81.0837	158.198	-87.9039	-88.206	-66.8459	-153.958	-110.453	-208.18	-93.5181	-267.481	-91.9289	-1.80198	-3.96954	-2.27214	1.78243	-1.01784	-2.01417	1.47569
		27	-56.2279	-125.54	-68.763	53.3264	-31.7152	-65.1143	46.8711	-86.4449	100.432	-78.8605	158.576	-83.0769	-88.9709	-69.0437	-155.941	-108.713	-207.624	-90.4455	-267.327	-85.5446	-56.2163	-126.069	-68.8844	52.4994	-31.3447	-65.4104	46.7027	-86.6725	100.738	-78.8173	159.001	-83.1004	-88.1124	-69.1811	-155.558	-109.801	-208.75	-90.263	-267.891	-85.9255	-1.81494	-4.07012	-2.22393	1.69494	-1.01196	-2.11177	1.50779
		28	-56.9352	-129.784	-67.079	48.8358	-30.5925	-68.4823	46.8711	-87.0062	102.2	-76.3851	159.699	-77.4636	-87.2869	-71.8503	-156.832	-109.604	-208.96	-86.8812	-266.881	-81.0891	-56.4453	-129.248	-67.5824	49.6366	-31.0808	-68.6601	47.549	-86.9326	101.507	-76.5734	159.438	-78.3338	-87.9598	-71.7252	-157.064	-109.301	-209.215	-87.1652	-267.858	-79.7945	-1.82233	-4.17277	-2.18189	1.60252	-1.00344	-2.21669	1.53512
		29	-56.2279	-132.613	-66.5177	46.5904	-30.5925	-73.5343	47.9938	-87.0062	102.2	-74.6169	159.699	-74.657	-87.8482	-74.0956	-158.614	-109.158	-209.851	-84.6535	-268.663	-72.6238	-56.5335	-132.416	-66.4736	46.7526	-30.8441	-71.908	48.3597	-87.2716	101.933	-74.3931	159.524	-73.604	-87.8883	-74.4876	-158.508	-108.871	-209.519	-84.2421	-267.498	-73.5061	-1.82518	-4.27505	-2.1461	1.50941	-0.9958	-2.32155	1.56129
		30	-56.2279	-135.442	-65.9563	43.7838	-31.1538	-74.657	49.6778	-87.5676	101.847	-71.7878	158.576	-69.0437	-87.8482	-77.4636	-159.505	-108.713	-210.297	-81.0891	-265.99	-67.2772	-56.6061	-135.598	-65.4432	43.8366	-30.6407	-74.96	49.0847	-87.7162	102.001	-72.2897	159.322	-68.7731	-87.9335	-77.4762	-159.898	-108.453	-209.502	-81.4807	-266.741	-67.2496	-1.82752	-4.37778	-2.11283	1.41526	-0.989233	-2.42008	1.5847
		31	-56.9352	-138.978	-64.2723	40.9771	-30.0312	-78.0249	49.6778	-88.6902	101.493	-70.7269	159.137	-63.4304	-87.8482	-80.8316	-161.287	-107.822	-208.515	-78.8614	-265.545	-61.9307	-56.7259	-138.885	-64.3868	40.7939	-30.4218	-77.9596	49.587	-88.2296	101.785	-70.2884	158.904	-63.9059	-88.0793	-80.6171	-161.229	-108.086	-209.113	-78.9221	-265.68	-61.0907	-1.83139	-4.48388	-2.07872	1.31703	-0.982168	-2.51692	1.60091
		32	-56.9352	-141.807	-63.711	38.1705	-30.5925	-80.2703	50.2391	-88.6902	101.139	-68.6051	158.015	-58.9397	-88.4096	-84.1996	-162.624	-107.822	-208.069	-77.0792	-264.208	-54.802	-56.8656	-142.348	-63.3108	37.5192	-30.2179	-81.0768	49.8469	-88.7524	101.326	-68.339	158.201	-59.1598	-88.2756	-83.8241	-162.418	-107.867	-208.46	-76.5396	-264.298	-55.0989	-1.8359	-4.59569	-2.04399	1.2113	-0.975583	-2.61756	1.6093
		33	-56.9352	-146.051	-62.027	33.6798	-29.4699	-84.7609	49.6778	-89.2516	101.139	-66.4833	158.015	-54.4491	-88.4096	-87.0062	-163.515	-107.376	-208.069	-73.9604	-262.871	-48.1188	-57.0278	-146.041	-62.2472	33.9815	-30.0212	-84.4344	49.9203	-89.3167	100.577	-66.4762	157.14	-54.5886	-88.4232	-87.0789	-163.383	-107.846	-207.543	-74.3012	-262.502	-49.5168	-1.84114	-4.71494	-2.00965	1.09709	-0.969233	-2.72596	1.61167
		34	-56.9352	-150.295	-60.9044	29.7505	-30.0312	-87.5676	49.6778	-90.3742	100.432	-64.0079	154.647	-50.5198	-89.5322	-89.8129	-163.96	-108.713	-206.733	-72.1782	-260.644	-45	-57.2368	-149.905	-61.2987	30.2892	-29.8555	-87.9961	49.9424	-89.9628	99.4666	-64.8191	155.673	-50.1624	-88.4391	-90.4554	-164.101	-108.023	-206.267	-72.2729	-260.191	-44.4892	-1.84789	-4.83967	-1.97903	0.977887	-0.963882	-2.84095	1.61239
		35	-57.6424	-153.831	-60.343	26.9439	-30.0312	-92.0582	49.6778	-90.3742	96.8959	-63.6542	154.647	-46.5904	-87.2869	-94.3035	-164.406	-107.822	-204.505	-70.396	-256.188	-40.5446	-57.4835	-153.87	-60.5193	26.4896	-29.6516	-91.7303	50.0013	-90.7358	98.093	-63.4583	153.875	-45.8277	-88.3061	-93.9963	-164.58	-108.329	-204.661	-70.4698	-257.365	-39.86	-1.85585	-4.96769	-1.95386	0.855215	-0.957302	-2.96151	1.61429
		36	-57.6424	-158.075	-60.343	22.4532	-29.4699	-95.9875	50.2391	-91.4969	96.5422	-62.5933	151.279	-41.5385	-87.8482	-97.6715	-165.743	-109.604	-201.832	-69.505	-254.851	-35.6436	-57.6947	-157.956	-59.8523	22.5174	-29.3704	-95.5455	50.0939	-91.7493	96.7346	-62.3136	151.688	-41.6459	-88.1939	-97.6136	-164.797	-108.793	-202.881	-68.8621	-254.082	-35.5474	-1.86267	-5.09962	-1.93233	0.726974	-0.948222	-3.08468	1.61728
		37	-58.3497	-161.611	-59.2204	18.5239	-28.9085	-98.7942	50.2391	-93.1809	94.7741	-61.5324	149.595	-37.0478	-88.4096	-101.601	-164.406	-108.713	-201.832	-67.2772	-251.287	-31.1881	-57.8133	-162.201	-59.2071	18.3759	-29.0729	-99.4246	50.1384	-93.0446	95.445	-61.3194	149.143	-37.8632	-88.0856	-101.255	-164.732	-109.416	-201.01	-67.4345	-250.206	-31.657	-1.8665	-5.23666	-1.9115	0.593264	-0.938616	-3.20992	1.61872
		38	-57.6424	-165.855	-58.0977	14.0333	-28.3472	-103.846	49.6778	-94.8649	94.7741	-60.4715	146.227	-33.6798	-88.4096	-104.407	-164.406	-110.05	-199.158	-65.9406	-245.05	-27.6238	-57.8091	-166.634	-58.5937	14.0872	-28.8544	-103.433	50.0727	-94.594	94.1304	-60.4953	146.249	-34.6988	-87.8483	-104.919	-164.551	-110.312	-198.939	-66.3025	-245.766	-28.328	-1.86636	-5.37977	-1.8917	0.454803	-0.931563	-3.33931	1.6166
		39	-57.6424	-172.927	-58.659	9.54262	-28.9085	-107.214	50.8004	-95.4262	93.0059	-59.7642	142.859	-32.5572	-87.2869	-108.898	-163.515	-112.277	-196.485	-65.495	-240.594	-25.8416	-57.7599	-171.115	-58.0252	9.7002	-28.7508	-107.541	49.8435	-96.4014	92.5721	-59.9231	143.093	-32.1262	-87.4335	-108.654	-164.391	-111.468	-196.694	-65.5622	-241.037	-25.5604	-1.86478	-5.52444	-1.87334	0.313171	-0.928217	-3.47195	1.6092
		40	-57.6424	-175.049	-57.5364	5.61331	-28.9085	-111.705	49.1164	-98.7942	90.5305	-59.7642	138.929	-30.8732	-87.2869	-112.266	-164.851	-111.832	-193.812	-65.0495	-237.03	-23.6139	-57.7298	-175.398	-57.4392	5.25126	-28.6838	-111.76	49.368	-98.4845	90.6821	-59.6822	139.768	-29.8696	-86.9284	-112.429	-164.288	-112.819	-194.382	-65.2161	-236.169	-23.1861	-1.8638	-5.66271	-1.85442	0.169537	-0.926055	-3.60818	1.59384
		41	-57.6424	-179.293	-56.4137	0.561331	-28.3472	-116.195	48.5551	-101.601	89.4695	-58.7033	137.245	-27.5052	-85.6029	-116.757	-164.406	-114.505	-192.921	-65.0495	-230.347	-20.9406	-57.7421	-179.58	-56.8934	0.758488	-28.5949	-116.049	48.7417	-100.675	88.4972	-59.8198	136.265	-27.7484	-86.4387	-116.228	-164.109	-114.41	-192.049	-65.2222	-231.219	-21.0848	-1.8642	-5.79772	-1.8368	0.0244878	-0.923184	-3.74662	1.57362
		42	-57.6424	-183.536	-56.4137	-3.92931	-28.9085	-120.686	48.5551	-102.162	84.8723	-61.1788	132.193	-25.8212	-86.1642	-119.563	-163.515	-116.733	-188.465	-66.3861	-225	-19.604	-57.7885	-183.764	-56.4758	-3.69864	-28.4707	-120.34	48.0466	-102.871	86.0986	-60.3301	132.432	-25.8176	-86.0957	-120.042	-163.809	-116.117	-189.645	-65.4876	-226.366	-19.2393	-1.8657	-5.93281	-1.82332	-0.11941	-0.919175	-3.88519	1.55118
		43	-58.3497	-188.487	-56.4137	-7.85863	-28.3472	-124.054	46.8711	-105.53	83.4578	-61.1788	128.264	-24.6985	-85.6029	-124.054	-163.515	-118.069	-187.574	-65.9406	-223.218	-18.2673	-57.8253	-187.959	-56.1687	-8.07749	-28.2794	-124.62	47.3374	-105.155	83.7085	-61.0093	128.272	-24.1338	-85.8672	-123.947	-163.43	-117.816	-187.222	-65.9217	-221.564	-17.6445	-1.86689	-6.06824	-1.8134	-0.260781	-0.913	-4.02336	1.52829
		44	-57.6424	-192.024	-55.8524	-12.9106	-27.7859	-129.106	46.3098	-107.775	82.0432	-61.8861	124.335	-21.8919	-86.1642	-127.983	-163.069	-119.406	-185.347	-66.3861	-217.426	-16.0396	-57.7999	-192.134	-55.9277	-12.3859	-28.0774	-128.926	46.7464	-107.526	81.3145	-61.7907	123.794	-22.7724	-85.6749	-127.945	-162.967	-119.539	-184.633	-66.6266	-216.504	-16.4037	-1.86607	-6.20302	-1.80562	-0.399878	-0.906477	-4.16238	1.5092
		45	-57.6424	-195.56	-55.2911	-16.2786	-27.7859	-133.597	46.3098	-109.459	78.5069	-63.3006	119.283	-21.8919	-86.1642	-131.913	-162.178	-121.634	-182.228	-67.2772	-210.297	-15.1485	-57.7602	-196.358	-55.7552	-16.6248	-27.9441	-133.199	46.305	-110.039	78.8204	-62.6985	119.017	-21.8865	-85.4126	-132.037	-162.423	-121.405	-181.784	-67.7455	-211.223	-15.7597	-1.86479	-6.33942	-1.80006	-0.536731	-0.902175	-4.30032	1.49495
		46	-57.6424	-201.218	-56.4137	-20.7692	-27.7859	-136.965	46.8711	-112.827	76.0314	-63.6542	113.669	-21.3306	-83.9189	-135.842	-162.178	-122.97	-178.663	-69.0594	-205.396	-15.5941	-57.7416	-200.663	-55.625	-20.8812	-27.8888	-137.41	45.9215	-112.794	76.2617	-63.8212	114.099	-21.4635	-85.1108	-136.234	-161.816	-123.526	-178.788	-69.3424	-206.005	-15.8745	-1.86418	-6.47839	-1.79585	-0.674149	-0.90039	-4.43627	1.48257
		47	-57.6424	-205.462	-55.2911	-24.6985	-27.7859	-141.455	45.1871	-116.195	74.2633	-65.0688	108.617	-21.8919	-85.6029	-140.894	-161.287	-125.198	-175.099	-71.7327	-201.832	-16.4851	-57.7386	-204.923	-55.4464	-25.1875	-27.8633	-141.605	45.5336	-115.776	73.6315	-65.3781	109.262	-21.4357	-84.9293	-140.498	-161.133	-126.031	-175.887	-71.3472	-200.945	-16.7372	-1.86409	-6.61592	-1.79009	-0.813178	-0.899566	-4.5717	1.47005
		48	-57.6424	-208.998	-55.2911	-30.3119	-28.3472	-146.507	44.6258	-119.002	71.7878	-66.1297	104.688	-21.8919	-84.4802	-144.823	-159.95	-129.653	-173.317	-73.9604	-196.04	-18.7129	-57.7117	-209.124	-55.2709	-29.5045	-27.7831	-145.744	45.2728	-118.971	70.8891	-67.5676	104.613	-21.7311	-84.8402	-144.717	-160.44	-128.887	-173.278	-73.6221	-195.998	-18.2257	-1.86322	-6.75157	-1.78442	-0.952551	-0.896976	-4.70533	1.46163
		49	-58.3497	-212.534	-54.7297	-33.6798	-27.7859	-149.314	45.1871	-121.809	66.4833	-71.0806	100.198	-21.3306	-84.4802	-148.753	-159.95	-131.881	-170.644	-75.7426	-190.248	-19.604	-57.5905	-213.398	-55.1602	-33.7221	-27.5721	-149.771	45.2099	-122.46	68.1726	-70.4292	100.093	-22.3817	-84.8802	-148.853	-159.829	-131.888	-170.975	-76.1183	-191.287	-20.1732	-1.85931	-6.88954	-1.78085	-1.08872	-0.890163	-4.83536	1.4596
		50	-56.9352	-218.193	-55.2911	-37.6091	-26.6632	-153.805	45.7484	-125.738	65.4224	-73.556	95.7069	-23.5759	-85.6029	-153.243	-159.059	-135	-168.861	-78.4158	-186.683	-22.7228	-57.3329	-217.821	-55.1456	-37.8865	-27.2994	-153.768	45.241	-126.33	65.7688	-73.7021	95.6272	-23.4196	-85.0098	-152.904	-159.302	-134.953	-168.942	-78.8719	-186.938	-22.4718	-1.85099	-7.03234	-1.78037	-1.22316	-0.88136	-4.96438	1.4606
		51	-56.9352	-222.436	-55.2911	-42.0998	-27.2245	-157.734	45.1871	-131.351	64.3615	-77.7996	91.2162	-25.2599	-85.0416	-156.611	-159.059	-138.119	-167.525	-82.4257	-183.564	-25.396	-57.0129	-222.318	-55.1812	-42.0442	-27.0328	-157.759	45.2855	-130.449	63.5916	-77.1722	91.1808	-24.6699	-85.1556	-156.892	-158.83	-138.046	-167.058	-81.7954	-182.817	-24.9448	-1.84066	-7.17752	-1.78152	-1.35739	-0.872754	-5.09325	1.46204
[truncated: 198 more columns]

## Sheet: C0017
			RAW COORDINATES																				SPLINE																				mm
			HEAD		TAIL		LEFT COXAE		LEFT FT		LEFT TT		LEFT TIP		RIGHT COXAE		RIGHT FT		RIGHT TT		RIGHT TIP		HEAD		TAIL		LEFT COXAE		LEFT FT		LEFT TT		LEFT TIP		RIGHT COXAE		RIGHT FT		RIGHT TT		RIGHT TIP		HEAD		TAIL		LEFT COXAE		LEFT FT
SCALE		Frame	X	Y	X	Y	X	Y	X	Y	X	Y	X	Y	X	Y	X	Y	X	Y	X	Y	X	Y	X	Y	X	Y	X	Y	X	Y	X	Y	X	Y	X	Y	X	Y	X	Y	X	Y	X	Y	X	Y	X
X	Y	-2	712.048	151.559	887.97	175.099	763.663	130.099	698.168	92.6733	674.735	43.8507	640.079	-2.12181	751.634	184.901	684.356	196.485	647.151	240.825	607.544	279.018	712	151.973	887.939	175.449	764.008	130.138	697.844	93.2222	675.026	43.1931	640.642	-2.91247	751.452	185.283	682.429	197.594	647.228	240.071	606.409	278.205	22.9869	4.90645	28.6671	5.66437	24.666	4.2015	22.5299
-376.181	421.436	-1	712.048	151.559	887.97	175.099	763.663	130.099	698.168	92.6733	674.735	43.8507	640.079	-2.12181	751.634	184.901	684.356	196.485	647.151	240.825	607.544	279.018	712	151.973	887.939	175.449	764.008	130.138	697.844	93.2222	675.026	43.1931	640.642	-2.91247	751.452	185.283	682.429	197.594	647.228	240.071	606.409	278.205	22.9869	4.90645	28.6671	5.66437	24.666	4.2015	22.5299
-66.468	425.678	0	712.048	151.559	887.97	175.099	763.663	130.099	698.168	92.6733	674.735	43.8507	640.079	-2.12181	751.634	184.901	684.356	196.485	647.151	240.825	607.544	279.018	712	151.973	887.939	175.449	764.008	130.138	697.844	93.2222	675.026	43.1931	640.642	-2.91247	751.452	185.283	682.429	197.594	647.228	240.071	606.409	278.205	22.9869	4.90645	28.6671	5.66437	24.666	4.2015	22.5299
		1	712.048	151.559	887.97	175.099	763.663	130.099	698.168	92.6733	674.735	43.8507	640.079	-2.12181	751.634	184.901	684.356	196.485	647.151	240.825	607.544	279.018	712	151.973	887.939	175.449	764.008	130.138	697.844	93.2222	675.026	43.1931	640.642	-2.91247	751.452	185.283	682.429	197.594	647.228	240.071	606.409	278.205	22.9869	4.90645	28.6671	5.66437	24.666	4.2015	22.5299
DISTANCE (mm)		2	709.241	154.366	885.297	176.881	762.772	131.881	696.832	92.6733	678.978	38.8998	648.566	-8.48723	749.851	187.574	678.564	204.059	646.444	244.008	601.886	281.847	709.8	153.585	885.659	176.672	762.621	131.603	698.296	92.4903	678.957	39.1749	648.143	-8.74936	750.035	187.063	680.263	203.248	645.111	244.792	603.333	281.896	22.9158	4.9585	28.5935	5.70385	24.6212	4.2488	22.5445
pixel	mm	3	708.119	154.927	883.515	178.218	760.545	132.772	699.95	91.7822	683.576	35.3635	655.992	-15.2063	748.96	188.911	677.228	210.297	642.554	249.666	601.532	285.383	707.583	155.1	883.369	177.786	761.123	133.07	698.776	91.5801	682.789	35.3671	655.475	-14.2994	748.669	188.741	678.663	208.567	643.043	249.728	600.565	285.865	22.8443	5.00739	28.5195	5.73982	24.5728	4.29617	22.56
309.742	10	4	704.751	156.05	880.842	178.218	760.099	134.109	699.059	90.4455	686.405	31.4735	662.711	-19.4499	746.733	189.802	677.673	212.525	640.432	254.971	597.996	289.98	705.238	156.588	880.984	178.756	759.408	134.589	699.043	90.3669	686.473	31.9167	662.593	-19.2673	747.383	190.343	677.723	213.501	641.354	254.909	598.135	290.348	22.7686	5.05542	28.4425	5.77114	24.5175	4.34521	22.5686
1	0.032285	5	703.067	158.295	878.614	180.446	758.317	136.782	699.505	90	689.941	28.6444	669.784	-24.4008	745.842	192.03	677.673	217.871	639.725	260.275	595.874	295.992	702.714	158.095	878.425	179.626	757.282	136.13	699.041	88.7871	690.137	28.9289	669.606	-23.5616	746.22	191.93	677.105	218.389	640.282	260.311	596.205	295.449	22.6871	5.10409	28.3599	5.79923	24.4488	4.39494	22.5685
		6	700.26	159.418	875.495	180.446	754.307	137.673	699.059	85.9901	693.831	26.5226	676.503	-26.5226	744.505	193.366	677.228	222.772	640.432	265.933	595.521	300.943	699.899	159.546	875.598	180.389	754.737	137.57	698.814	86.8764	693.929	26.3906	676.686	-27.2324	745.074	193.456	676.415	223.414	639.795	265.917	594.943	301.191	22.5962	5.15093	28.2686	5.82385	24.3666	4.44145	22.5612
LENGTH (mm)		7	696.331	160.541	872.822	180.446	751.188	138.119	697.723	83.7624	698.075	24.4008	683.576	-30.7662	744.95	195.149	675.891	229.01	640.079	271.945	594.46	306.601	696.756	160.872	872.439	181.197	752.017	138.919	698.526	84.9024	697.94	24.2057	684.044	-30.4923	743.679	194.861	675.428	228.548	639.717	271.708	594.464	307.686	22.4947	5.19375	28.1667	5.84994	24.2788	4.48498	22.5519
Body	5.35005	8	693.524	162.225	868.812	182.228	748.96	140.347	698.614	83.7624	701.965	22.6326	691.709	-32.888	741.832	196.04	673.663	233.911	639.371	277.957	594.106	315.442	693.326	161.968	868.895	182.22	749.279	140.197	698.377	82.9337	702.238	22.3032	691.831	-33.4549	741.69	196.087	674.168	233.613	640.006	277.679	594.999	314.959	22.384	5.22914	28.0522	5.88295	24.1904	4.52627	22.5471
R. Femur	2.37867	9	689.033	163.347	864.802	183.119	746.287	141.683	698.168	80.6436	706.916	20.1572	700.55	-35.7171	738.713	196.485	672.772	238.366	641.139	282.908	596.582	323.222	689.584	162.661	864.987	183.458	746.448	141.26	698.413	80.7739	706.898	20.6834	700.074	-36.2232	739.03	197.135	672.782	238.517	640.703	283.896	596.757	322.798	22.2632	5.25149	27.926	5.92292	24.099	4.56059	22.5482
R. Tibia	1.71571	10	686.227	162.786	860.347	184.901	744.059	142.129	698.614	78.8614	711.866	19.0963	708.684	-38.8998	736.04	198.267	670.99	243.713	642.908	289.627	600.118	329.941	685.494	162.855	860.729	184.852	743.319	141.974	698.672	78.3439	711.944	19.4031	708.773	-38.7573	735.708	197.972	671.324	243.255	641.751	290.445	599.734	331.065	22.1311	5.25776	27.7886	5.96793	23.998	4.58362	22.5566
R. Tarsus	1.69337	11	680.613	162.225	856.337	186.238	739.604	142.129	699.059	75.7426	717.171	19.4499	717.525	-39.9607	732.03	199.158	670.545	246.832	642.2	296.699	603.654	339.489	680.947	162.624	856.069	186.267	739.673	142.318	699.147	75.6121	717.38	18.3997	718.024	-40.8764	731.688	198.432	669.803	247.83	643.22	297.157	603.855	339.682	21.9843	5.2503	27.6381	6.01363	23.8803	4.59474	22.5719
L. Femur	2.44159	12	676.123	162.786	851.436	187.574	735.594	142.574	699.505	72.6238	722.475	18.389	727.426	-42.7898	726.683	198.267	667.871	253.069	644.322	305.54	608.605	348.33	675.953	162.042	850.868	187.561	735.449	142.323	699.797	72.6653	723.184	17.5701	727.902	-42.3515	727.011	198.42	668.19	252.285	645.415	303.59	609.113	348.329	21.8231	5.23152	27.4702	6.05539	23.7439	4.5949	22.5929
L. Tibia	1.78342	13	669.948	160.541	844.752	188.911	730.693	142.129	700.842	69.505	729.194	16.6208	738.743	-43.1434	721.337	198.267	666.535	255.743	648.919	308.723	616.031	357.525	670.495	161.131	845.061	188.584	730.621	141.998	700.544	69.6476	729.24	17.0818	738.334	-42.7764	721.796	198.016	666.589	256.505	648.407	309.262	615.447	356.573	21.6469	5.20209	27.2828	6.08844	23.5881	4.58441	22.617
L. Tarsus	1.6947	14	664.896	159.979	838.515	189.356	725.347	141.238	700.842	66.8317	735.56	16.2672	747.937	-41.7289	715.99	196.931	665.198	260.198	652.102	314.381	623.104	362.829	664.546	160.025	838.711	189.211	725.195	141.407	701.251	66.6929	735.256	17.3235	749.133	-41.8141	716.081	197.323	665.07	260.453	651.99	314.081	622.702	364.029	21.4548	5.16639	27.0778	6.10868	23.4129	4.56531	22.6399
		15	658.16	158.857	832.277	189.356	718.218	140.347	702.624	64.1584	740.511	18.7426	759.607	-39.2534	710.198	196.485	662.97	264.208	655.285	317.564	629.823	370.609	657.983	158.764	831.831	189.399	719.211	140.647	701.813	63.9079	740.906	18.5647	760.11	-39.2321	709.774	196.469	663.681	263.948	656.02	317.963	630.849	370.459	21.2429	5.1257	26.8556	6.11472	23.2197	4.54077	22.658
mg	14	16	650.863	157.173	824.257	188.911	713.317	139.455	701.733	60.5941	746.169	20.5108	770.57	-36.0707	703.069	195.149	662.525	267.772	661.297	320.747	639.725	376.621	650.74	157.35	824.397	189.152	712.693	139.767	702.091	61.4373	745.908	20.8166	770.797	-34.8007	702.76	195.505	662.454	266.723	660.364	320.836	639.929	375.414	21.0091	5.08005	26.6156	6.10677	23.0093	4.51238	22.667
		17	643.004	156.05	816.238	188.911	706.188	139.455	700.842	60.1485	750.059	24.4008	781.179	-27.9371	695.495	194.257	661.188	268.663	664.479	323.222	648.919	379.096	642.823	155.792	816.468	188.463	705.478	138.722	702.09	59.443	749.923	24.0528	780.527	-28.3626	695.035	194.447	661.272	268.615	664.781	322.55	649.758	378.479	20.7535	5.02974	26.3596	6.08452	22.7763	4.47864	22.6669
		18	634.584	153.805	807.772	187.574	697.277	137.228	702.624	57.4752	753.242	27.9371	790.02	-20.5108	686.139	193.812	659.851	268.663	668.369	323.222	660.589	379.804	634.282	154.078	808.082	187.291	697.533	137.418	701.707	57.9481	752.654	28.2072	788.593	-20.029	686.714	193.217	659.986	269.719	669.183	322.949	659.997	379.559	20.4778	4.9744	26.0889	6.04668	22.5198	4.43652	22.6546
		19	624.48	152.121	799.752	185.347	689.257	135.446	700.396	57.0297	754.303	32.5344	795.324	-11.6699	677.673	191.584	658.515	269.554	673.674	321.1	670.138	377.682	625.237	152.23	799.2	185.699	689.007	135.9	700.587	57.0622	753.888	33.2604	794.503	-9.9137	678.005	191.707	658.426	270.142	673.423	322.042	670.138	378.785	20.1857	4.91474	25.8021	5.99529	22.2445	4.38751	22.6184
		20	616.06	150.437	790.396	183.564	679.455	134.554	699.505	55.6931	752.888	39.2534	798.153	2.47544	669.208	190.248	656.733	271.337	677.564	320.039	680.393	376.267	615.841	150.216	789.73	183.823	680.046	134.186	698.498	56.825	753.574	39.1096	798.177	1.68297	668.991	189.928	656.389	269.717	677.161	319.886	679.762	376.317	19.8824	4.8497	25.4964	5.93472	21.9553	4.3322	22.551
		21	605.956	148.191	779.257	181.782	670.545	132.327	695.05	57.4752	752.888	45.2652	798.861	14.499	659.851	187.574	654.059	268.663	680.393	317.21	688.527	372.024	606.106	147.975	779.728	181.718	670.807	132.202	695.28	57.1769	751.754	45.478	799.805	14.0753	659.656	187.915	653.706	268.176	680.092	316.345	688.517	372.069	19.5681	4.77735	25.1735	5.86675	21.657	4.26815	22.4471
		22	596.414	145.385	769.01	179.554	662.079	130.099	691.485	57.9208	748.291	52.3379	799.214	27.5835	650.05	185.347	650.05	265.545	682.161	311.906	696.306	367.78	596.039	145.503	769.404	179.362	661.309	129.938	690.975	57.8138	748.398	52.0681	799.564	26.6832	650.029	185.749	650.313	265.616	682.037	311.316	696.2	365.882	19.2431	4.69757	24.8402	5.79069	21.3503	4.19503	22.3081
		23	586.31	143.701	759.208	176.881	650.941	127.426	685.248	58.8119	742.279	59.057	798.153	38.8998	639.802	184.01	646.485	261.98	682.868	304.479	703.733	356.464	585.651	142.854	758.88	176.746	651.519	127.441	685.662	58.4416	743.694	58.5575	797.393	39.1208	640.194	183.43	646.229	262.333	682.914	304.934	702.649	357.691	18.9077	4.61202	24.5004	5.70624	21.0343	4.11443	22.1366
		24	573.96	139.21	748.515	173.762	641.139	124.307	679.455	58.8119	739.096	64.3615	794.263	50.9234	630	180.891	641.584	258.416	682.161	297.407	706.916	348.33	575.065	140.111	748.176	173.916	641.537	124.805	679.5	58.8286	737.787	64.7017	793.138	51.2202	630.233	180.876	641.449	258.617	682.685	297.495	707.79	347.793	18.566	4.52348	24.1548	5.61488	20.712	4.02932	21.9376
		25	564.418	136.965	737.376	171.089	632.673	122.525	672.327	59.2574	731.316	70.3733	785.776	63.3006	620.644	178.218	635.347	254.406	681.807	289.98	710.452	337.014	564.515	137.497	737.386	170.951	631.349	122.098	672.579	58.8335	730.566	70.3671	786.867	62.7975	620.122	178.12	636.02	254.66	681.277	289.219	711.756	336.344	18.2253	4.4391	23.8065	5.51915	20.3831	3.94193	21.7142
		26	553.753	135.281	725.347	167.525	620.644	119.406	664.752	58.3663	721.415	75.3242	779.057	72.8487	609.95	175.099	629.554	250.396	678.978	280.432	715.403	322.868	554.011	135.045	726.701	167.91	620.89	119.299	664.938	58.3567	722.183	75.3709	778.885	73.6167	609.793	175.234	629.995	250.572	678.526	280.323	714.464	323.589	17.8862	4.35993	23.4615	5.42097	20.0454	3.85157	21.4675
		27	544.771	133.035	716.881	164.851	609.059	116.287	658.069	57.4752	712.927	79.9214	769.862	84.165	599.703	172.426	623.762	247.277	674.735	270.884	715.756	311.198	543.465	132.627	716.248	164.853	610.367	116.462	656.55	57.3953	712.994	79.5095	769.321	83.4964	599.291	172.306	623.255	246.385	674.386	271.201	715.537	309.92	17.5458	4.28186	23.124	5.32228	19.7057	3.75998	21.1967
		28	532.422	130.229	706.188	161.733	600.594	113.168	646.485	55.6931	703.379	83.1041	758.193	92.6523	587.673	169.307	616.634	241.931	669.43	261.69	716.11	295.992	532.8	130.162	705.884	161.76	599.928	113.68	647.413	55.9773	703.216	82.5927	758.314	92.1459	588.753	169.406	615.572	242.127	668.963	262.295	714.75	295.671	17.2014	4.20227	22.7894	5.22242	19.3686	3.67016	20.9017
		29	521.195	127.422	695.495	159.059	589.901	111.386	638.02	54.802	693.124	85.5796	747.23	100.432	578.762	166.188	607.723	237.03	662.004	252.495	712.927	278.31	522.198	127.68	695.546	158.586	589.444	110.982	637.812	54.1336	693.018	84.5511	746.128	99.413	578.357	166.62	606.867	238.007	662.499	253.949	712.062	281.449	16.8591	4.12215	22.4557	5.11995	19.0302	3.58306	20.5917
		30	512.214	125.177	684.802	155.05	578.317	108.267	627.772	52.1287	681.807	85.9332	732.024	107.151	567.624	163.96	596.584	233.911	655.992	246.13	708.684	267.348	511.776	125.236	685.278	155.308	578.893	108.294	627.92	51.8727	682.607	85.5153	733.095	105.358	568.079	163.99	597.385	234.189	655.333	246.264	707.804	267.829	16.5227	4.04325	22.1242	5.0141	18.6895	3.49626	20.2724
		31	501.549	122.931	675.446	151.931	568.515	105.594	617.525	48.5644	672.259	84.165	718.939	107.505	558.267	161.733	586.782	231.238	646.444	240.118	699.843	256.031	501.423	122.825	675.102	151.993	568.362	105.601	617.893	49.3547	672.178	85.905	719.728	110.408	557.901	161.454	587.582	230.58	647.754	238.968	702.636	254.655	16.1884	3.96541	21.7956	4.90709	18.3495	3.40933	19.9486
[truncated: 198 more columns]

## Sheet: C0018
			RAW COORDINATES																				SPLINE																				mm
			HEAD		TAIL		LEFT COXAE		LEFT FT		LEFT TT		LEFT TIP		RIGHT COXAE		RIGHT FT		RIGHT TT		RIGHT TIP		HEAD		TAIL		LEFT COXAE		LEFT FT		LEFT TT		LEFT TIP		RIGHT COXAE		RIGHT FT		RIGHT TT		RIGHT TIP		HEAD		TAIL		LEFT COXAE		LEFT FT
SCALE		Frame	X	Y	X	Y	X	Y	X	Y	X	Y	X	Y	X	Y	X	Y	X	Y	X	Y	X	Y	X	Y	X	Y	X	Y	X	Y	X	Y	X	Y	X	Y	X	Y	X	Y	X	Y	X	Y	X	Y	X
X	Y	-2	460.985	35.7353	636.114	55.4513	528.291	24.4101	458.5	-15.5	441.5	-74.5	421.5	-131.5	515.193	68.0706	445.336	75.215	383.815	104.19	331.422	122.845	461.093	35.5152	636.312	55.1941	527.04	23.2138	458.14	-15.8136	442.461	-75.9342	422.967	-133.074	516.2	67.9742	445.551	74.5204	383.808	103.912	331.276	122.293	14.8864	1.14661	20.5433	1.78194	17.0154	0.749455	14.791
-376.181	421.436	-1	460.985	35.7353	636.114	55.4513	528.291	24.4101	458.5	-15.5	441.5	-74.5	421.5	-131.5	515.193	68.0706	445.336	75.215	383.815	104.19	331.422	122.845	461.093	35.5152	636.312	55.1941	527.04	23.2138	458.14	-15.8136	442.461	-75.9342	422.967	-133.074	516.2	67.9742	445.551	74.5204	383.808	103.912	331.276	122.293	14.8864	1.14661	20.5433	1.78194	17.0154	0.749455	14.791
-66.468	425.678	0	460.985	35.7353	636.114	55.4513	528.291	24.4101	458.5	-15.5	441.5	-74.5	421.5	-131.5	515.193	68.0706	445.336	75.215	383.815	104.19	331.422	122.845	461.093	35.5152	636.312	55.1941	527.04	23.2138	458.14	-15.8136	442.461	-75.9342	422.967	-133.074	516.2	67.9742	445.551	74.5204	383.808	103.912	331.276	122.293	14.8864	1.14661	20.5433	1.78194	17.0154	0.749455	14.791
		1	460.985	35.7353	636.114	55.4513	528.291	24.4101	458.5	-15.5	441.5	-74.5	421.5	-131.5	515.193	68.0706	445.336	75.215	383.815	104.19	331.422	122.845	461.093	35.5152	636.312	55.1941	527.04	23.2138	458.14	-15.8136	442.461	-75.9342	422.967	-133.074	516.2	67.9742	445.551	74.5204	383.808	103.912	331.276	122.293	14.8864	1.14661	20.5433	1.78194	17.0154	0.749455	14.791
DISTANCE (mm)		2	461.779	33.3529	635.484	57.3416	525.116	20.441	460	-20	451	-82	434	-139.5	515.59	67.6736	443.749	75.6119	383.815	106.571	331.422	126.417	460.914	33.9196	635.15	57.9753	525.875	21.8146	459.756	-21.0925	449.617	-81.4239	434.152	-138.567	515.853	67.8605	444.785	75.7546	384.619	106.726	331.122	126.353	14.8806	1.09509	20.5058	1.87173	16.9778	0.704285	14.8432
pixel	mm	3	459.397	32.5588	634.224	61.1224	522.734	20.441	461	-28.5	456	-87.5	448	-144.5	514.796	67.6736	444.939	76.4057	385.799	110.143	331.025	129.989	460.748	32.3671	633.94	60.8086	525.095	20.7467	461.51	-26.202	456.524	-86.4557	444.826	-143.574	515.146	67.769	443.887	77.2184	385.386	109.627	331.035	130.605	14.8752	1.04497	20.4667	1.9632	16.9527	0.669806	14.8998
309.742	10	4	460.191	30.9706	631.703	63.0128	525.513	20.0441	462.5	-31	463.5	-91.5	454	-148.5	516.781	67.6736	443.749	78.3903	387.387	111.731	331.422	134.752	460.728	30.7821	632.724	63.6188	524.777	20.0101	463.565	-30.8538	463.216	-90.7626	454.625	-147.877	513.64	67.6742	442.546	79.0623	385.905	112.693	331.151	135.22	14.8746	0.9938	20.4275	2.05393	16.9424	0.646024	14.9662
1	0.032285	5	461.779	29.3824	631.703	66.1634	525.513	19.6472	467	-33	469.5	-93.5	463	-152	511.224	68.0706	440.176	82.3594	386.196	116.494	331.422	140.309	460.695	29.1116	631.573	66.3323	524.459	19.4588	465.921	-35.2307	469.705	-94.3908	463.864	-151.555	510.978	67.5178	440.704	81.2052	386.107	116.06	331.636	140.209	14.8735	0.939868	20.3903	2.14154	16.9321	0.628227	15.0422
		6	460.985	27	630.443	69.9442	524.719	18.8534	469	-40.5	476	-98.5	473.5	-154	506.461	67.6736	439.383	82.7563	385.402	119.669	331.422	146.659	460.357	27.3717	630.345	68.7452	523.772	18.9482	468.369	-39.5525	476.025	-97.5639	472.848	-154.908	507.517	67.2675	438.604	83.4318	386.288	119.697	332.703	145.441	14.8626	0.883696	20.3507	2.21944	16.91	0.611741	15.1213
LENGTH (mm)		7	458.603	26.2059	629.813	70.5743	521.147	16.4719	469	-44	483	-99	482	-158	504.079	66.4829	437.001	84.7409	385.402	123.638	335.391	150.232	459.67	25.63	628.878	70.6487	522.683	18.3729	470.92	-43.5921	482.179	-100.397	481.686	-158.324	503.786	67.0404	436.484	85.7138	386.798	123.614	334.461	150.855	14.8404	0.827464	20.3033	2.28089	16.8748	0.593167	15.2036
Body	5.35005	8	459.397	23.0294	626.662	71.8346	521.94	19.6472	475	-47	488	-103.5	489	-160.5	499.713	66.086	432.238	89.9008	389.768	126.814	336.185	156.185	458.739	23.9173	627.093	72.094	521.346	17.5086	473.682	-47.2349	488.196	-103.089	490.604	-161.986	500.105	67.0458	434.759	87.8789	387.711	127.845	336.768	156.636	14.8104	0.77217	20.2457	2.32755	16.8316	0.565263	15.2928
R. Femur	2.37867	9	457.015	22.2353	624.142	73.0948	519.559	17.2657	476	-51	493.5	-105.5	500.5	-163.5	494.553	66.8798	433.032	89.9008	388.181	133.561	340.154	162.139	457.494	22.3243	625.103	73.1689	519.657	15.8131	476.435	-50.5	494.285	-105.596	499.846	-165.87	496.779	67.3345	433.862	89.6093	388.851	132.363	339.586	162.872	14.7702	0.72074	20.1814	2.36225	16.7771	0.510526	15.3817
R. Tibia	1.71571	10	456.221	20.6471	623.512	73.725	517.971	13.2966	480	-53	500	-107.5	509.5	-172.5	494.95	68.0706	433.429	91.0915	388.975	136.34	343.33	170.474	455.93	20.7666	622.924	73.8933	517.548	13.2073	479.127	-53.4045	500.608	-107.883	509.346	-169.46	493.913	67.6804	433.631	91.01	390.391	136.982	342.833	169.469	14.7197	0.670449	20.1111	2.38564	16.709	0.426397	15.4686
R. Tarsus	1.69337	11	453.838	19.0588	620.361	74.9852	515.59	10.1213	481	-57.5	508	-110	519	-171	491.378	68.8644	434.62	93.0761	393.341	141.499	345.711	176.031	453.987	19.0821	620.36	74.2461	514.993	10.0702	481.731	-56.0433	507.104	-109.897	519.103	-171.785	491.14	67.7211	433.564	92.3725	392.39	141.689	346.547	176.199	14.6569	0.616065	20.0283	2.39703	16.6265	0.325116	15.5527
L. Femur	2.44159	12	451.456	18.2647	618.471	73.725	511.224	4.96141	483.5	-57	513	-111.5	527	-175	488.6	67.2767	434.223	92.2822	395.325	146.262	350.871	182.778	451.634	17.0751	617.296	74.2053	512.087	6.88699	484.351	-58.5303	513.578	-111.494	529.182	-172.389	488.218	67.2226	433.121	94.0633	394.597	146.384	350.868	183.01	14.581	0.551269	19.9294	2.39571	16.5327	0.222346	15.6373
L. Tibia	1.78342	13	449.868	15.0882	612.799	73.725	509.239	4.16759	488	-61	520	-113	541.5	-171.5	485.028	66.086	432.238	94.6637	396.913	151.422	356.428	189.526	448.813	14.6055	613.716	73.8809	509.036	4.04994	486.928	-61.2019	519.975	-112.536	539.513	-170.959	485.039	66.2372	432.057	96.5129	396.942	150.88	355.771	189.856	14.4899	0.471537	19.8138	2.38524	16.4342	0.130752	15.7205
L. Tarsus	1.6947	14	445.103	11.9118	609.649	73.0948	505.667	1.3892	489.5	-63.5	526.5	-113	551	-170	482.249	64.8953	431.047	100.617	398.501	154.994	360.397	197.067	445.478	11.8308	609.821	73.3066	505.897	1.52127	489.227	-64.1167	526.156	-112.916	549.631	-167.765	481.596	64.886	430.448	99.6801	399.571	154.982	361.225	196.613	14.3822	0.381956	19.688	2.3667	16.3329	0.0491141	15.7947
		15	441.132	7.14706	605.868	73.0948	501.698	-0.992282	491.5	-68	531.5	-112	557	-160	477.089	62.9107	428.269	101.808	403.264	158.567	368.335	202.227	441.79	9.09119	605.659	72.4409	502.71	-0.827042	491.224	-67.1647	531.979	-112.639	559.48	-163.475	477.937	63.2593	428.509	103.053	402.606	158.613	367.299	203.089	14.2632	0.293509	19.5537	2.33875	16.23	-0.026701	15.8591
mg	14	16	437.956	6.35294	600.827	71.2045	500.507	-2.57993	492	-70	538.5	-112.5	569	-157	473.914	61.323	425.491	107.365	405.645	161.742	373.495	208.578	437.848	6.66217	601.2	71.2223	499.416	-3.15588	493.035	-70.1312	537.351	-111.719	569.287	-159.1	474.213	61.4208	426.588	106.159	405.959	161.726	373.969	209.132	14.1359	0.215088	19.4097	2.29941	16.1236	-0.101887	15.9176
		17	433.985	4.76471	596.416	69.3141	495.744	-5.35832	494	-72.5	541.5	-110.5	579	-153.5	470.342	59.3385	424.697	110.54	409.614	163.727	381.036	215.325	433.588	4.3623	596.429	69.7256	495.775	-5.6386	494.796	-72.9498	542.156	-110.072	578.778	-154.866	470.398	59.3498	424.951	108.36	409.612	164.266	381.376	214.386	13.9984	0.140837	19.2557	2.25109	16.0061	-0.182042	15.9745
		18	428.426	2.38235	591.375	67.4237	491.775	-8.13671	498	-77	545.5	-107.5	587.5	-152.5	466.373	57.7508	423.506	108.159	413.186	166.108	388.975	219.691	428.952	1.85181	591.258	68.0352	491.736	-8.31049	496.377	-75.5461	546.476	-107.782	587.481	-150.245	466.35	56.9827	423.583	109.351	413.516	166.148	389.59	218.372	13.8487	0.0597855	19.0887	2.19651	15.8757	-0.268304	16.0255
		19	424.456	0	586.334	67.4237	487.012	-11.7089	497	-76.5	551	-104.5	596.5	-148	462.404	54.1786	422.712	110.54	417.552	168.093	398.104	220.882	423.951	-1.1046	585.582	66.1059	487.305	-11.1002	497.499	-77.8182	550.254	-105.059	594.961	-144.404	461.895	54.2915	422.346	109.322	417.583	167.162	398.542	220.873	13.6872	-0.035662	18.9055	2.13423	15.7326	-0.35837	16.0617
		20	418.103	-5.55882	579.403	63.6429	483.043	-14.0904	498	-80.5	553	-102	600.5	-134.5	457.244	51.0033	420.331	108.953	421.918	167.696	408.026	220.882	418.526	-4.53531	579.364	63.8043	482.48	-13.9154	498.182	-79.8954	553.213	-102.038	600.888	-137.155	456.893	51.4164	421.091	108.385	421.651	167.112	407.979	222.022	13.5121	-0.146422	18.7048	2.05992	15.5768	-0.449258	16.0838
		21	413.338	-7.94118	572.471	61.1224	477.089	-16.4719	498	-81	555.5	-99	605.5	-129	451.29	48.2249	420.331	104.983	425.491	164.917	417.552	222.073	412.683	-8.24455	572.749	61.2541	477.224	-16.8028	498.411	-81.7233	555.181	-98.7127	605.261	-129.104	451.339	48.4922	419.702	106.896	425.545	166.046	417.517	221.967	13.3234	-0.266175	18.4912	1.97758	15.4072	-0.542477	16.0912
		22	406.191	-11.9118	565.54	57.9718	471.533	-19.2503	498.5	-83.5	556.5	-95	608	-121	445.336	45.4465	418.743	105.38	429.46	164.52	427.872	220.485	406.393	-12.1901	565.916	58.6093	471.606	-19.8648	498.081	-83.2695	555.997	-95.0495	608.094	-120.453	445.337	45.5377	417.949	105.299	429.148	164.132	426.756	220.603	13.1204	-0.393558	18.2706	1.8922	15.2258	-0.641335	16.0805
		23	399.838	-16.6765	559.239	55.4513	465.579	-23.6163	498.5	-85.5	556	-91.5	609.5	-111	438.986	42.6681	416.362	102.999	433.032	162.536	435.413	219.294	399.742	-16.303	558.962	55.9488	465.692	-23.1035	497.004	-84.3838	555.589	-91.0766	609.426	-111.259	438.996	42.4819	415.748	103.639	432.361	161.338	435.373	217.777	12.9057	-0.526341	18.0461	1.8063	15.0348	-0.745894	16.0457
		24	392.691	-20.6471	551.677	54.191	460.419	-26.7916	494	-86	553.5	-87	609	-102.5	432.238	39.4928	412.393	102.205	434.223	155.788	443.749	213.341	392.816	-20.4545	551.898	53.1698	459.515	-26.3906	495.149	-84.9909	554.04	-86.8509	609.293	-101.684	432.425	39.2285	413.263	101.837	435.194	157.722	443.304	213.4	12.682	-0.660372	17.818	1.71658	14.8354	-0.852019	15.9859
		25	385.544	-24.6176	544.746	50.4102	452.084	-29.1731	492.5	-83.5	552	-81.5	608	-91	425.888	36.7144	410.408	100.221	437.398	153.407	449.702	206.196	385.7	-24.5964	544.764	50.0778	453.132	-29.7032	492.789	-85.3411	551.528	-82.5319	607.727	-91.9062	425.719	35.7334	410.799	99.6887	437.771	153.53	450.584	207.721	12.4523	-0.794093	17.5877	1.61676	14.6294	-0.958966	15.9097
		26	379.191	-28.5882	537.184	46.6295	446.13	-33.5391	489.5	-85.5	547.5	-79.5	604.5	-82.5	418.346	31.1577	407.233	96.2514	439.779	148.644	456.847	200.243	378.45	-28.7469	537.565	46.7022	446.739	-33.1087	489.998	-85.8738	548.156	-78.2784	604.711	-82.2263	418.937	32.0795	408.47	97.0714	440.012	148.626	457.299	200.974	12.2182	-0.928092	17.3553	1.50778	14.4229	-1.06891	15.8196
		27	370.456	-33.3529	531.513	42.8487	440.97	-36.3175	488	-87	543	-74	600.5	-73	412.393	27.9824	406.836	94.6637	442.955	144.278	464.388	195.083	371.121	-32.931	530.267	43.2021	440.308	-36.6009	486.694	-86.6441	544.065	-74.0918	600.264	-72.799	412.136	28.5362	406.185	93.9568	441.684	142.738	463.336	193	11.9816	-1.06318	17.1196	1.39478	14.2153	-1.18166	15.7129
		28	364.103	-36.5294	521.431	38.4378	434.62	-40.6836	482.5	-88.5	540	-70.5	594.5	-64	406.042	25.6009	403.66	91.0915	441.367	136.736	467.563	184.763	363.889	-37.1627	522.818	39.719	433.654	-40.2255	482.739	-87.5372	539.215	-70.1882	594.383	-63.8014	405.259	25.1866	403.581	90.1998	442.549	135.679	468.486	183.506	11.7481	-1.1998	16.8792	1.28233	14.0005	-1.29868	15.5852
		29	356.162	-41.2941	515.13	37.8077	425.888	-42.6681	477	-89	534.5	-67	588	-57	397.31	21.2348	400.485	86.3286	442.558	128.004	471.929	172.062	356.834	-41.5073	515.353	36.2364	426.758	-44.0142	478.249	-88.5532	533.329	-66.8501	587.116	-55.4836	398.321	21.9587	400.382	85.821	442.583	127.673	472.704	172.702	11.5204	-1.34006	16.6381	1.16989	13.7779	-1.421	15.4403
		30	349.809	-46.0588	509.458	32.1365	420.331	-49.4157	474	-89	528	-63.5	580.5	-47.5	390.959	18.4564	396.119	79.9779	441.367	116.494	476.295	161.345	350.009	-45.8973	507.745	32.5147	419.815	-48.0104	473.291	-89.9577	526.316	-64.4346	578.599	-48.2385	391.47	18.8021	396.371	81.1138	441.559	119.293	475.749	161.168	11.3	-1.48179	16.3925	1.04973	13.5537	-1.55001	15.2802
		31	342.662	-50.8235	500.007	28.9859	411.996	-51.4002	468	-91.5	517	-63.5	566.5	-40.5	385.402	16.4719	392.15	76.4057	441.367	112.922	477.486	149.438	343.314	-50.1897	499.836	28.5786	412.903	-52.0564	467.672	-92.1186	518.494	-63.2973	569.287	-42.7748	384.642	15.5053	391.343	76.4733	439.168	111.089	477.184	149.421	11.0839	-1.62037	16.1372	0.92266	13.3305	-1.68064	15.0988
		32	338.691	-54	491.185	24.575	406.439	-56.957	462	-94.5	508.5	-63.5	559	-40.5	377.464	11.7089	386.99	72.4366	434.62	103.396	477.883	137.133	336.527	-54.3025	491.857	24.4793	406.115	-56.2012	461.31	-95.1754	510.544	-63.6009	559.96	-39.5892	377.638	11.7916	385.089	72.0606	435.181	103.096	476.666	137.981	10.8648	-1.75315	15.8796	0.790313	13.1114	-1.81445	14.8934
		33	329.162	-57.9706	483.623	19.534	399.294	-60.9261	453.5	-98.5	503	-63.5	552.5	-36.5	371.114	8.93054	377.464	66.4829	430.65	94.6637	474.708	126.417	329.39	-58.2902	484.137	20.3446	399.387	-60.4673	454.275	-99.0333	502.788	-65.495	550.815	-38.6689	370.397	7.58059	377.68	67.9779	429.829	95.6232	474.026	127.333	10.6343	-1.8819	15.6303	0.656823	12.8942	-1.95218	14.6662
		34	321.221	-62.7353	476.062	16.3833	392.547	-63.3076	447.5	-105	496	-69.5	540	-39.5	362.778	1.3892	367.938	64.4983	423.109	87.1224	470.739	116.891	322.087	-62.1562	476.829	16.3012	392.671	-65.038	446.771	-103.378	495.007	-69.0046	541.768	-39.9563	362.901	2.90474	369.651	64.3245	423.385	89.0984	469.425	117.72	10.3986	-2.00671	15.3944	0.526284	12.6774	-2.09975	14.424
		35	314.868	-65.9118	470.391	12.6026	386.593	-69.6582	438.5	-107.5	487.5	-72.5	533.5	-42.5	354.84	-0.992282	361.588	61.72	415.965	83.1533	462.8	108.159	314.827	-65.8467	469.892	12.3012	385.91	-70.1465	438.906	-107.827	486.971	-73.7212	532.963	-42.9243	355.28	-1.9861	361.502	60.8897	416.263	83.6354	463.326	109.078	10.1642	-2.12586	15.1704	0.397142	12.4591	-2.26468	14.1701
		36	307.721	-69.0882	463.459	8.19166	378.655	-76.8026	430.5	-112.5	478	-81.5	524.5	-49.5	347.696	-7.7398	353.252	57.3539	408.026	80.7718	454.465	102.999	307.607	-69.4255	463.104	8.28597	379.052	-75.6288	430.886	-112.319	478.719	-79.1667	524.268	-46.794	347.649	-7.05477	353.33	57.4643	408.845	78.8146	456.501	101.051	9.93109	-2.2414	14.9513	0.267512	12.2377	-2.44167	13.9111
[truncated: 198 more columns]

## Sheet: C0025
			RAW COORDINATES																				SPLINE																				mm
			HEAD		TAIL		LEFT COXAE		LEFT FT		LEFT TT		LEFT TIP		RIGHT COXAE		RIGHT FT		RIGHT TT		RIGHT TIP		HEAD		TAIL		LEFT COXAE		LEFT FT		LEFT TT		LEFT TIP		RIGHT COXAE		RIGHT FT		RIGHT TT		RIGHT TIP		HEAD		TAIL		LEFT COXAE		LEFT FT
SCALE		Frame	X	Y	X	Y	X	Y	X	Y	X	Y	X	Y	X	Y	X	Y	X	Y	X	Y	X	Y	X	Y	X	Y	X	Y	X	Y	X	Y	X	Y	X	Y	X	Y	X	Y	X	Y	X	Y	X	Y	X
X	Y	-2	-396.5	-338	-536.5	-244	-420.118	-291.749	-344.794	-305.894	-288.805	-294.137	-232.11	-297.505	-447.348	-334.892	-411.175	-405.281	-420.331	-455.061	-419.537	-509.835	-396.694	-338.195	-536.236	-244.212	-420.392	-291.962	-344.916	-306.637	-288.67	-294.648	-230.976	-298.112	-447.881	-334.695	-410.341	-404.604	-419.491	-455.547	-418.552	-509.717	-12.9407	-11.0324	-17.4928	-7.96655	-13.7138	-9.52423	-11.2517
592.327	125.941	-1	-396.5	-338	-536.5	-244	-420.118	-291.749	-344.794	-305.894	-288.805	-294.137	-232.11	-297.505	-447.348	-334.892	-411.175	-405.281	-420.331	-455.061	-419.537	-509.835	-396.694	-338.195	-536.236	-244.212	-420.392	-291.962	-344.916	-306.637	-288.67	-294.648	-230.976	-298.112	-447.881	-334.695	-410.341	-404.604	-419.491	-455.547	-418.552	-509.717	-12.9407	-11.0324	-17.4928	-7.96655	-13.7138	-9.52423	-11.2517
898.861	128.614	0	-396.5	-338	-536.5	-244	-420.118	-291.749	-344.794	-305.894	-288.805	-294.137	-232.11	-297.505	-447.348	-334.892	-411.175	-405.281	-420.331	-455.061	-419.537	-509.835	-396.694	-338.195	-536.236	-244.212	-420.392	-291.962	-344.916	-306.637	-288.67	-294.648	-230.976	-298.112	-447.881	-334.695	-410.341	-404.604	-419.491	-455.547	-418.552	-509.717	-12.9407	-11.0324	-17.4928	-7.96655	-13.7138	-9.52423	-11.2517
		1	-396.5	-338	-536.5	-244	-420.118	-291.749	-344.794	-305.894	-288.805	-294.137	-232.11	-297.505	-447.348	-334.892	-411.175	-405.281	-420.331	-455.061	-419.537	-509.835	-396.694	-338.195	-536.236	-244.212	-420.392	-291.962	-344.916	-306.637	-288.67	-294.648	-230.976	-298.112	-447.881	-334.695	-410.341	-404.604	-419.491	-455.547	-418.552	-509.717	-12.9407	-11.0324	-17.4928	-7.96655	-13.7138	-9.52423	-11.2517
DISTANCE (mm)		2	-392	-339	-529	-243	-415.874	-291.749	-338.782	-304.479	-283.191	-290.208	-223.129	-291.331	-444.872	-332.77	-409.491	-404.158	-421.125	-457.442	-422.315	-511.025	-391.899	-339.094	-529.845	-242.052	-415.953	-290.931	-338.521	-303.699	-283.467	-290.058	-225.055	-292.101	-444.78	-333.402	-410.039	-404.85	-421.295	-457.103	-422.165	-511.614	-12.7843	-11.0617	-17.2843	-7.89608	-13.569	-9.4906	-11.0431
pixel	mm	3	-387.5	-340.5	-523.5	-239.5	-411.616	-289.848	-333.124	-301.297	-278.139	-285.156	-219.761	-286.84	-441.69	-332.77	-409.491	-405.281	-423.506	-458.633	-425.888	-512.613	-387.043	-339.919	-523.496	-239.873	-411.416	-289.874	-332.099	-300.55	-278.296	-285.301	-219.414	-285.839	-441.501	-332.14	-409.992	-405.289	-423.379	-458.511	-426.125	-513.517	-12.6259	-11.0887	-17.0772	-7.82501	-13.421	-9.45611	-10.8336
306.546	10	4	-381.5	-340.5	-518	-237.5	-406.575	-288.588	-324.283	-296.699	-273.649	-280.665	-215.832	-278.981	-437.8	-331.709	-410.052	-406.403	-425.491	-459.427	-430.254	-516.185	-382.115	-340.612	-517.038	-237.854	-406.674	-288.949	-325.742	-297.2	-273.113	-280.237	-213.911	-278.951	-437.898	-330.834	-410.301	-405.955	-425.989	-459.708	-430.8	-515.246	-12.4652	-11.1113	-16.8666	-7.75914	-13.2663	-9.42596	-10.6262
1	0.0326215	5	-377	-342	-510	-237	-401.849	-288.273	-320.039	-293.517	-268.597	-275.052	-207.973	-271.684	-434.263	-329.587	-411.736	-405.842	-428.666	-461.014	-436.207	-516.582	-377.179	-341.232	-510.328	-236.12	-401.657	-288.338	-319.708	-293.849	-267.856	-274.723	-208.482	-271.254	-433.868	-329.563	-410.908	-406.865	-429.364	-460.661	-436.482	-516.435	-12.3041	-11.1315	-16.6477	-7.70257	-13.1027	-9.40603	-10.4293
		6	-372	-341.5	-503.5	-234	-396.809	-287.958	-312.967	-289.98	-261.861	-268.877	-202.36	-263.264	-429.666	-327.112	-411.175	-408.087	-433.032	-460.617	-442.161	-516.979	-372.173	-341.892	-503.425	-234.745	-396.297	-288.133	-313.996	-290.602	-262.619	-268.729	-203.496	-262.651	-429.319	-328.648	-411.713	-408.081	-433.594	-461.303	-443.307	-516.887	-12.1408	-11.153	-16.4225	-7.65774	-12.9278	-9.39931	-10.243
LENGTH (mm)		7	-368	-342	-496.5	-233.5	-390.193	-288.588	-309.077	-288.212	-257.37	-262.141	-198.992	-252.599	-424.361	-328.173	-412.297	-409.21	-438.589	-461.411	-451.29	-515.788	-366.949	-342.851	-496.371	-233.944	-390.591	-288.378	-308.543	-287.429	-257.653	-262.331	-199.249	-253.181	-424.263	-328.376	-412.764	-409.456	-438.551	-461.589	-451.25	-516.499	-11.9704	-11.1843	-16.1924	-7.63161	-12.7417	-9.40732	-10.0651
Body	4.92714	8	-360.5	-344.5	-489	-234	-384.522	-288.273	-303.065	-283.969	-253.441	-255.405	-196.746	-243.056	-418.35	-329.587	-414.543	-411.455	-444.146	-462.205	-460.022	-515.788	-361.372	-344.276	-489.215	-233.783	-384.642	-289.09	-303.095	-284.177	-253.06	-255.646	-195.735	-243.016	-418.82	-328.672	-414.005	-410.773	-443.938	-461.329	-460.013	-515.159	-11.7885	-11.2308	-15.9589	-7.62635	-12.5476	-9.43053	-9.88741
R. Femur	2.41436	9	-356	-346.5	-481.5	-234.5	-378.221	-291.109	-299.175	-280.786	-248.95	-248.669	-192.817	-232.952	-413.045	-329.234	-415.104	-412.578	-449.702	-459.427	-469.151	-513.407	-355.484	-346.124	-482.028	-234.197	-378.485	-290.273	-297.462	-280.83	-248.857	-248.744	-192.877	-232.231	-413.126	-329.379	-415.273	-411.795	-449.446	-460.302	-469.238	-512.631	-11.5964	-11.2911	-15.7245	-7.63987	-12.3468	-9.46913	-9.70367
R. Tibia	1.56429	10	-349	-348	-475	-235	-372.55	-292.054	-291.395	-278.31	-246.143	-243.056	-191.694	-221.726	-406.68	-330.295	-416.788	-412.578	-454.465	-459.427	-479.074	-508.247	-349.221	-348.382	-474.808	-235.164	-372.089	-291.807	-291.576	-277.363	-245.136	-241.626	-190.817	-220.919	-407.21	-330.529	-416.492	-412.475	-454.834	-458.429	-478.57	-508.826	-11.3921	-11.3648	-15.4889	-7.67139	-12.1381	-9.51917	-9.51166
R. Tarsus	1.63136	11	-343	-350.5	-468	-236.5	-365.618	-292.999	-284.676	-273.006	-241.091	-233.514	-187.765	-208.254	-401.375	-332.417	-416.227	-411.455	-460.022	-455.458	-487.409	-503.484	-342.57	-351.111	-467.43	-236.732	-365.381	-293.728	-285.749	-273.787	-242.092	-234.34	-189.788	-209.386	-401.025	-332.161	-417.594	-412.99	-459.906	-455.534	-487.662	-503.839	-11.1752	-11.4538	-15.2483	-7.72254	-11.9193	-9.58186	-9.32156
L. Femur	2.31607	12	-335	-355.5	-459.5	-239.5	-358.057	-296.464	-279.725	-270.884	-239.407	-227.339	-191.133	-198.15	-394.656	-334.185	-419.033	-413.701	-464.388	-452.679	-495.744	-498.324	-335.527	-354.27	-459.818	-238.917	-358.393	-296.139	-280.287	-270.279	-240.097	-227.215	-190.107	-198.099	-394.417	-334.265	-418.494	-413.497	-464.406	-451.62	-496.263	-497.654	-10.9454	-11.5568	-14.9999	-7.79382	-11.6913	-9.66048	-9.14338
L. Tibia	1.80939	13	-328.5	-356.5	-452	-241	-350.811	-298.985	-276.542	-266.994	-238.846	-220.042	-192.256	-187.484	-387.583	-337.014	-419.595	-414.823	-468.357	-445.932	-504.476	-489.592	-328.139	-357.729	-452.015	-241.706	-351.217	-299.003	-275.209	-266.93	-239.313	-220.476	-191.734	-187.317	-387.298	-336.872	-418.837	-413.819	-468.081	-446.786	-504.063	-490.18	-10.7044	-11.6697	-14.7454	-7.8848	-11.4572	-9.75392	-8.97773
L. Tarsus	1.71446	14	-320.5	-362	-444	-245	-343.88	-301.82	-269.823	-263.458	-239.969	-214.99	-192.817	-176.819	-379.804	-339.843	-418.472	-413.701	-471.136	-441.566	-511.224	-484.035	-320.38	-361.533	-444.028	-245.165	-343.862	-302.319	-270.419	-263.924	-239.659	-214.307	-194.779	-177.253	-379.668	-340.018	-418.36	-413.795	-470.696	-441.324	-510.642	-481.426	-10.4513	-11.7937	-14.4849	-7.99766	-11.2173	-9.86211	-8.82146
		15	-311.5	-366	-435.5	-249.5	-336.949	-306.231	-265.58	-262.043	-240.53	-208.254	-199.553	-168.96	-371.67	-343.026	-416.788	-413.701	-471.136	-435.215	-515.193	-470.143	-312.283	-365.542	-435.838	-249.225	-336.221	-306.072	-266.06	-261.472	-240.925	-208.835	-199.42	-168.137	-371.617	-343.758	-417.009	-413.499	-472.105	-435.403	-515.678	-471.451	-10.1871	-11.9245	-14.2177	-8.13008	-10.968	-9.98452	-8.67928
mg	9	16	-305	-370	-427.5	-253.5	-327.812	-310.642	-262.043	-259.214	-243.337	-204.886	-206.85	-160.541	-362.829	-347.976	-414.543	-412.017	-472.723	-429.261	-519.162	-460.221	-303.885	-369.68	-427.398	-253.749	-328.213	-310.137	-262.189	-259.712	-242.923	-204.289	-205.42	-160.157	-363.285	-348.07	-414.787	-413.057	-472.22	-429.186	-518.98	-460.808	-9.9132	-12.0595	-13.9424	-8.27768	-10.7068	-10.1171	-8.55299
		17	-294	-374	-420	-259.5	-319.936	-314.422	-258.861	-258.861	-245.021	-200.395	-210.78	-152.682	-354.695	-353.635	-412.297	-413.701	-471.136	-422.514	-521.544	-449.107	-295.114	-374.021	-418.592	-258.645	-319.901	-314.43	-258.708	-258.858	-245.416	-200.836	-212.544	-153.685	-354.804	-352.75	-411.64	-412.571	-470.789	-422.814	-520.287	-449.863	-9.62706	-12.2011	-13.6551	-8.43739	-10.4356	-10.2572	-8.43946
		18	-287	-378	-408.5	-263.5	-311.429	-318.833	-255.324	-258.507	-248.389	-199.834	-219.761	-148.191	-346.208	-357.878	-407.245	-412.017	-467.96	-416.163	-518.368	-439.184	-286.044	-378.737	-409.383	-263.826	-311.298	-318.988	-255.47	-259.044	-248.219	-198.72	-220.791	-149.173	-346.199	-357.582	-407.479	-411.984	-467.636	-416.415	-519.426	-438.731	-9.33118	-12.355	-13.3547	-8.60639	-10.155	-10.4059	-8.33381
		19	-276	-384	-400	-269	-302.608	-323.559	-252.141	-258.861	-251.195	-197.588	-230.426	-147.069	-337.014	-362.122	-402.193	-410.894	-463.594	-410.209	-517.971	-427.277	-276.612	-383.972	-400.018	-269.367	-302.413	-323.869	-252.342	-260.342	-251.084	-198.185	-229.777	-146.807	-337.447	-362.564	-402.344	-411.439	-462.713	-410.041	-516.46	-427.342	-9.02351	-12.5257	-13.0492	-8.78716	-9.86517	-10.5651	-8.23178
		20	-267.5	-389.5	-390.5	-275	-293.156	-329.545	-249.312	-263.811	-253.441	-198.15	-239.407	-146.507	-328.88	-367.78	-397.141	-411.455	-455.259	-404.256	-510.43	-415.766	-266.878	-389.701	-390.617	-275.299	-293.295	-329.076	-249.159	-262.62	-253.793	-199.669	-238.819	-146.507	-328.492	-367.788	-396.245	-411.12	-456.117	-403.675	-511.37	-415.688	-8.70596	-12.7126	-12.7425	-8.98066	-9.56773	-10.735	-8.12793
		21	-256.5	-396	-380.5	-282	-283.39	-333.641	-245.776	-266.994	-256.809	-200.956	-247.827	-148.191	-319.686	-373.084	-387.037	-410.894	-448.512	-397.111	-504.476	-404.653	-256.849	-395.85	-381.24	-281.531	-284.04	-334.56	-245.707	-265.44	-256.136	-203.45	-247.358	-148.195	-319.206	-373.259	-389.198	-411.108	-448.119	-397.361	-504.368	-403.772	-8.37878	-12.9132	-12.4366	-9.18395	-9.2658	-10.9138	-8.01532
		22	-247.5	-401.5	-372.5	-287.5	-275.513	-340.887	-241.886	-268.055	-257.37	-209.938	-255.686	-152.121	-309.784	-379.096	-380.301	-412.017	-438.986	-391.951	-495.347	-391.951	-246.62	-402.313	-371.878	-287.909	-274.682	-340.307	-241.802	-268.645	-257.873	-209.281	-255.031	-151.809	-309.548	-378.948	-381.293	-411.517	-438.861	-391.268	-495.543	-391.665	-8.04511	-13.124	-12.1312	-9.39203	-8.96055	-11.1013	-7.88794
		23	-236	-410	-362.5	-294.5	-265.117	-346.558	-237.996	-271.945	-259.615	-218.358	-261.299	-157.734	-299.528	-384.754	-376.933	-412.578	-427.872	-386.395	-483.837	-380.838	-236.294	-408.955	-362.379	-294.349	-265.151	-346.154	-237.288	-272.466	-258.865	-216.292	-261.659	-157.306	-299.627	-384.79	-372.118	-412.46	-428.538	-385.583	-484.943	-379.66	-7.70826	-13.3407	-11.8213	-9.6021	-8.64962	-11.292	-7.7407
		24	-225.5	-415.5	-352.5	-301	-255.665	-351.914	-231.631	-276.542	-258.493	-225.094	-267.474	-162.786	-289.273	-390.413	-362.9	-413.701	-417.552	-380.044	-475.105	-368.137	-226.137	-415.528	-352.7	-300.705	-255.524	-352.041	-232.075	-277.059	-258.942	-223.74	-267.216	-164.734	-289.624	-390.747	-361.186	-414.158	-417.355	-380.68	-472.515	-368.232	-7.37694	-13.5552	-11.5056	-9.80943	-8.33557	-11.4841	-7.57063
		25	-216	-422	-343	-307	-244.953	-357.27	-225.972	-282.554	-258.493	-230.707	-271.403	-174.012	-279.725	-397.132	-347.744	-415.385	-406.042	-376.075	-459.228	-357.023	-216.364	-421.973	-342.849	-306.861	-245.928	-358.026	-226.212	-282.396	-258.051	-231.472	-271.645	-174.151	-279.693	-396.758	-349.154	-416.864	-405.383	-377.124	-458.091	-358.138	-7.05811	-13.7654	-11.1843	-10.0103	-8.02253	-11.6793	-7.37937
		26	-206.5	-429	-334	-313	-236.762	-364.516	-219.607	-288.212	-255.686	-239.127	-274.771	-185.8	-269.47	-403.143	-334.272	-420.998	-392.944	-374.487	-442.558	-348.688	-207.002	-428.285	-332.806	-312.785	-236.463	-364.119	-219.674	-288.312	-256.102	-239.719	-274.917	-185.179	-269.904	-402.706	-337.271	-420.644	-392.739	-375.317	-442.096	-350.119	-6.75272	-13.9713	-10.8566	-10.2035	-7.71378	-11.8781	-7.16609
		27	-198.5	-433.5	-321.5	-318.5	-226.995	-370.817	-212.888	-294.578	-252.318	-248.108	-277.017	-197.027	-260.629	-408.448	-325.291	-424.927	-379.052	-375.281	-423.109	-343.925	-197.934	-434.506	-322.64	-318.507	-227.033	-370.172	-212.353	-294.64	-253.06	-248.58	-276.951	-197.337	-260.289	-408.566	-326.385	-425.222	-379.715	-375.34	-425.392	-344.571	-6.4569	-14.1742	-10.525	-10.3902	-7.40617	-12.0756	-6.92726
		28	-189.5	-440.5	-312.5	-324.5	-217.544	-376.173	-204.401	-301.65	-250.634	-258.212	-278.139	-211.622	-250.727	-414.106	-316.871	-431.102	-366.351	-376.075	-408.82	-340.353	-188.935	-440.787	-312.637	-324.113	-217.552	-376.12	-204.14	-301.198	-248.777	-257.949	-277.625	-210.259	-250.801	-414.429	-316.516	-430.301	-366.647	-377.019	-408.88	-341.459	-6.16335	-14.3791	-10.1987	-10.5731	-7.09686	-12.2696	-6.65935
		29	-179.5	-447.5	-302	-329	-208.722	-381.529	-195.206	-308.369	-243.898	-267.755	-278.139	-223.41	-241.179	-420.118	-307.89	-435.593	-353.252	-380.441	-391.356	-339.956	-179.917	-447.071	-302.884	-329.723	-207.939	-382.072	-195.063	-307.808	-243.014	-267.591	-276.851	-223.621	-241.443	-420.364	-307.278	-435.582	-353.715	-380.063	-392.963	-340.459	-5.86918	-14.5841	-9.88054	-10.7561	-6.78328	-12.4638	-6.36324
		30	-171	-454	-294.5	-335	-197.695	-387.83	-186.365	-313.674	-236.601	-277.859	-275.894	-236.32	-232.338	-426.837	-298.347	-441.206	-340.948	-384.013	-377.067	-341.544	-170.929	-453.203	-293.321	-335.502	-198.158	-388.157	-185.246	-314.425	-235.97	-277.313	-274.739	-237.381	-232.203	-426.345	-298.343	-440.934	-340.968	-383.987	-377.805	-340.923	-5.57595	-14.7842	-9.56856	-10.9446	-6.4642	-12.6622	-6.04301
		31	-162	-458.5	-283.5	-342	-188.244	-394.761	-173.281	-321.454	-225.936	-286.84	-269.158	-252.599	-223.143	-432.141	-289.927	-446.258	-328.644	-389.57	-364.763	-343.925	-161.958	-459.155	-283.741	-341.443	-188.323	-394.36	-174.927	-321.115	-228.188	-287.009	-271.789	-251.47	-223.016	-432.3	-289.541	-446.291	-328.328	-388.337	-363.157	-342.063	-5.28333	-14.9783	-9.25607	-11.1384	-6.14338	-12.8646	-5.7064
[truncated: 198 more columns]

## Sheet: C0026
			RAW COORDINATES																				SPLINE																				mm
			HEAD		TAIL		LEFT COXAE		LEFT FT		LEFT TT		LEFT TIP		RIGHT COXAE		RIGHT FT		RIGHT TT		RIGHT TIP		HEAD		TAIL		LEFT COXAE		LEFT FT		LEFT TT		LEFT TIP		RIGHT COXAE		RIGHT FT		RIGHT TT		RIGHT TIP		HEAD		TAIL		LEFT COXAE		LEFT FT
SCALE		Frame	X	Y	X	Y	X	Y	X	Y	X	Y	X	Y	X	Y	X	Y	X	Y	X	Y	X	Y	X	Y	X	Y	X	Y	X	Y	X	Y	X	Y	X	Y	X	Y	X	Y	X	Y	X	Y	X	Y	X
X	Y	-2	299	28.5	402.967	158.162	350.077	58.5447	331.04	-21.8317	370.693	-62.3762	405.891	-105.594	324.73	90.9356	251.287	38.3168	195.678	45.8434	141.698	49.0187	299.339	28.4419	402.739	158.382	350.125	57.255	331.278	-22.1153	371.926	-62.8369	406.563	-105.622	325.62	91.4133	251.271	38.2795	195.374	46.1173	140.949	48.8122	9.76488	0.927816	13.1379	5.16666	11.4216	1.86774	10.8068
592.327	125.941	-1	299	28.5	402.967	158.162	350.077	58.5447	331.04	-21.8317	370.693	-62.3762	405.891	-105.594	324.73	90.9356	251.287	38.3168	195.678	45.8434	141.698	49.0187	299.339	28.4419	402.739	158.382	350.125	57.255	331.278	-22.1153	371.926	-62.8369	406.563	-105.622	325.62	91.4133	251.271	38.2795	195.374	46.1173	140.949	48.8122	9.76488	0.927816	13.1379	5.16666	11.4216	1.86774	10.8068
898.861	128.614	0	299	28.5	402.967	158.162	350.077	58.5447	331.04	-21.8317	370.693	-62.3762	405.891	-105.594	324.73	90.9356	251.287	38.3168	195.678	45.8434	141.698	49.0187	299.339	28.4419	402.739	158.382	350.125	57.255	331.278	-22.1153	371.926	-62.8369	406.563	-105.622	325.62	91.4133	251.271	38.2795	195.374	46.1173	140.949	48.8122	9.76488	0.927816	13.1379	5.16666	11.4216	1.86774	10.8068
		1	299	28.5	402.967	158.162	350.077	58.5447	331.04	-21.8317	370.693	-62.3762	405.891	-105.594	324.73	90.9356	251.287	38.3168	195.678	45.8434	141.698	49.0187	299.339	28.4419	402.739	158.382	350.125	57.255	331.278	-22.1153	371.926	-62.8369	406.563	-105.622	325.62	91.4133	251.271	38.2795	195.374	46.1173	140.949	48.8122	9.76488	0.927816	13.1379	5.16666	11.4216	1.86774	10.8068
DISTANCE (mm)		2	298.5	26.5	399.816	158.162	349.283	53.7817	335.941	-22.7228	379.604	-61.4851	415.693	-102.03	324.73	89.8129	248.614	38.7624	192.503	48.6218	138.126	51.7971	298.305	26.8082	400.232	158.265	349.331	54.9287	335.643	-23.1289	378.915	-60.9509	415.376	-101.779	324.085	90.1722	249.086	38.8374	192.954	48.0024	137.836	51.3207	9.73117	0.874524	13.0562	5.16284	11.3957	1.79186	10.9492
pixel	mm	3	297.5	25.5	397.926	158.162	348.49	52.591	339.059	-25.396	386.287	-59.703	424.158	-98.0198	323.046	89.8129	246.832	39.2079	189.724	50.6064	132.569	53.3848	297.167	25.1769	397.779	158.067	348.518	52.9777	339.943	-24.0225	385.522	-58.938	423.978	-97.9405	322.282	88.7476	246.879	39.4038	190.611	49.8291	134.995	53.9268	9.69404	0.821308	12.9761	5.15637	11.3692	1.72821	11.0895
306.546	10	4	295.5	23.5	395.405	157.532	348.093	50.2095	346.188	-24.505	392.079	-56.1386	432.178	-94.0099	320.239	87.0062	245.495	40.9901	188.931	50.6064	132.569	56.957	295.883	23.4984	395.349	157.688	347.655	51.4941	344.132	-24.6617	391.565	-56.8364	432.238	-94.1729	320.134	86.9344	244.519	39.959	188.271	51.7246	132.626	56.806	9.65214	0.766551	12.8969	5.14403	11.341	1.67981	11.2261
1	0.0326215	5	295	21	392.885	157.532	346.108	50.2095	347.079	-24.9505	397.871	-54.3564	440.644	-89.5545	316.871	84.7609	241.04	40.099	186.946	53.7817	131.775	59.7354	294.476	21.7793	392.922	157.038	346.725	50.3433	348.094	-25.1931	397.105	-54.8493	440.084	-90.5656	317.781	84.7541	241.892	40.4929	185.67	53.9646	130.391	60.0459	9.60625	0.710473	12.8177	5.12282	11.3107	1.64227	11.3553
		6	293	20.5	391.625	156.272	345.314	51.7971	351.535	-25.8416	400.99	-53.0198	447.327	-87.7723	315.748	82.5156	239.257	40.099	183.374	55.7663	129.394	64.1014	292.932	20.0008	390.499	156.022	345.776	49.0685	352.075	-25.7919	402.408	-53.0365	447.471	-87.1177	315.378	82.3055	239.054	41.197	182.712	56.6039	127.877	63.7199	9.55589	0.652457	12.7386	5.08966	11.2797	1.60069	11.4852
LENGTH (mm)		7	291	18.5	386.584	154.381	346.108	47.4311	356.881	-25.396	407.228	-51.6832	454.01	-82.8713	312.38	79.1476	236.139	42.3267	178.214	60.9261	124.631	67.6736	291.338	17.9949	388.138	154.663	344.712	47.2645	356.177	-26.5719	407.862	-51.3048	454.47	-83.626	312.9	79.7051	235.936	42.1691	179.673	59.5446	125.072	67.861	9.50389	0.587022	12.6616	5.04533	11.245	1.54184	11.619
Body	4.92714	8	289	16	385.323	153.121	342.933	44.6527	358.663	-27.6238	412.129	-48.5644	462.475	-81.5347	310.696	76.341	233.911	43.2178	176.626	62.5138	121.852	72.0397	289.806	15.6917	386.064	153.054	343.379	45.15	360.358	-27.5776	413.542	-49.5506	461.125	-79.9359	310.324	77.0858	232.476	43.2434	176.965	62.5656	122.36	72.5609	9.45392	0.511888	12.594	4.99285	11.2015	1.47286	11.7554
R. Femur	2.41436	9	289	12.5	385.323	151.231	341.742	41.4774	365.792	-28.9604	421.04	-48.5644	466.485	-75.297	307.89	75.7796	228.564	45.4455	174.245	65.2922	119.868	78.3903	288.33	13.1824	384.17	151.242	341.885	43.1082	364.614	-28.5907	419.215	-47.6996	467.443	-75.8491	307.554	74.4232	228.754	44.2261	174.687	65.7105	120.085	77.8606	9.40576	0.43003	12.5322	4.93375	11.1528	1.40625	11.8942
R. Tibia	1.56429	10	287	11	382.803	149.34	340.154	41.8743	368.465	-29.4059	425.05	-45.8911	472.723	-70.8416	303.399	70.7277	223.663	45	173.451	68.8644	117.883	83.1533	286.738	10.6183	382.157	149.273	340.313	41.326	368.657	-29.358	424.393	-45.5235	473.66	-71.4572	304.564	71.5686	225.174	44.9957	172.754	69.0657	118.437	83.7019	9.35383	0.346386	12.4665	4.8695	11.1015	1.34812	12.0261
R. Tarsus	1.63136	11	284	6.5	379.652	146.19	339.361	39.4928	372.03	-30.7426	429.059	-42.3267	478.96	-66.8317	303.399	69.0437	221.881	45.4455	171.069	73.2304	117.089	89.9008	284.981	8.03449	379.984	147.196	338.673	39.6213	372.365	-29.7157	428.965	-42.9557	479.816	-66.782	301.362	68.592	222.095	45.7077	170.999	72.6079	117.494	90.0863	9.29651	0.262097	12.3957	4.80175	11.048	1.29251	12.1471
L. Femur	2.31607	12	284.5	6.5	377.132	144.929	335.788	38.3021	376.931	-28.9604	432.624	-40.5446	486.535	-61.4851	297.786	65.1143	218.317	45.8911	169.482	76.0088	117.883	97.0452	283.051	5.4269	377.803	145.02	336.975	37.8371	375.616	-29.5903	433.073	-40.0268	485.633	-61.6764	297.826	65.475	219.509	46.5728	169.394	76.2796	117.174	96.9101	9.23354	0.177033	12.3245	4.73076	10.9926	1.2343	12.2532
L. Tibia	1.80939	13	281	3	375.871	143.669	336.185	34.7299	377.376	-29.8515	436.188	-36.9802	491.881	-56.5842	292.734	62.869	218.762	47.6733	168.688	79.9779	118.28	104.19	280.813	2.52445	375.69	142.521	335.306	35.8448	378.278	-29.1092	436.896	-36.6746	490.637	-55.9586	294.229	62.2334	217.205	47.7036	167.971	80.1383	117.313	104.003	9.16055	0.0823513	12.2556	4.64926	10.9382	1.16931	12.34
L. Tarsus	1.71446	14	277.5	-1.5	373.981	139.888	332.613	33.9361	380.941	-28.5149	439.307	-32.0792	494.109	-49.901	291.05	58.3784	215.644	48.5644	165.91	84.344	117.486	111.334	278.419	-0.759508	373.556	139.465	333.574	33.5509	380.448	-28.357	440.476	-32.9364	494.584	-49.4418	290.866	58.8627	214.777	49.0405	166.828	84.2059	117.938	111.228	9.08245	-0.0247763	12.186	4.54957	10.8817	1.09448	12.4108
		15	276	-3	370.83	134.847	332.216	32.3484	382.277	-26.7327	444.653	-30.297	497.673	-42.3267	287.682	55.0104	212.079	50.7921	166.703	87.9162	117.883	118.479	276.092	-4.38433	371.344	135.897	331.763	30.6562	382.12	-27.5603	443.6	-28.8997	497.534	-42.0969	287.697	55.4555	212.155	50.4512	166.178	88.4606	119.313	118.5	9.00655	-0.143023	12.1138	4.43318	10.8226	1.00005	12.4653
mg	9	16	273	-10	368.94	132.327	330.232	26.7916	382.723	-26.7327	446.881	-24.0594	499.01	-34.3069	284.314	52.2037	207.624	52.1287	165.91	91.4884	122.249	125.226	273.853	-8.37248	369.071	131.965	329.714	26.9821	383.358	-26.9771	445.808	-24.5536	499.52	-34.0482	284.642	52.0045	209.55	51.7127	166.096	92.8717	121.572	125.772	8.93348	-0.273123	12.0396	4.30489	10.7558	0.880195	12.5057
		17	272.5	-12	367.68	128.546	327.453	22.8225	384.95	-27.1782	446.436	-19.604	502.574	-26.2871	282.069	48.8358	209.406	53.0198	165.91	99.0298	125.028	133.164	271.597	-12.5654	366.657	127.62	327.349	22.7467	384.252	-26.6718	446.876	-20.1289	500.549	-25.513	281.607	48.385	207.098	52.676	166.713	97.2137	124.536	132.963	8.85991	-0.409903	11.9609	4.16315	10.6786	0.742032	12.5349
		18	269.5	-16	363.269	121.615	324.278	17.2657	384.505	-26.2871	447.772	-15.5941	498.119	-15.5941	279.823	44.3451	204.059	52.5743	167.894	101.808	128.6	138.721	269.076	-17.0649	364.019	122.891	324.735	18.2254	384.798	-26.6348	446.858	-15.7933	500.635	-16.8248	278.447	44.518	204.62	53.3262	168.102	101.018	128.126	139.882	8.77767	-0.556681	11.8748	4.00888	10.5933	0.594538	12.5527
		19	266	-22.5	362.009	117.834	321.896	12.8997	384.505	-27.1782	445.545	-12.4752	499.901	-8.0198	274.21	40.4158	202.277	54.3564	170.673	102.999	131.775	147.056	266.22	-21.8755	361.257	117.965	321.969	13.6452	385.099	-26.9382	445.821	-11.5552	500.085	-8.43816	275.186	40.4285	202.323	53.7073	170.131	104.197	132.442	146.283	8.6845	-0.713612	11.7848	3.84818	10.5031	0.445125	12.5625
		20	264	-27.5	357.598	113.423	319.515	9.72437	384.95	-26.7327	442.871	-8.0198	499.01	-1.33663	270.281	35.9252	200.05	53.0198	172.657	106.968	136.935	153.01	263.095	-26.7628	358.403	112.783	319.046	8.97645	385.193	-27.6174	444.001	-7.4004	498.731	-0.547563	272.128	36.1273	200.415	53.7487	172.607	106.876	137.681	151.713	8.58256	-0.873041	11.6916	3.67916	10.4077	0.292825	12.5656
		21	258.5	-31.5	355.707	107.752	315.546	4.96141	384.505	-28.5149	442.871	-3.11881	497.673	8.0198	270.281	31.9958	197.822	53.9109	175.039	108.953	142.889	156.185	259.793	-31.6157	355.57	107.223	315.943	4.00763	384.957	-28.6923	441.555	-3.54802	496.242	6.77316	269.332	31.6008	199.041	53.4433	175.448	108.961	143.874	155.902	8.47485	-1.03135	11.5992	3.49776	10.3065	0.130735	12.5579
		22	256.5	-36.5	352.557	100.82	313.164	-1.3892	386.733	-31.1881	437.525	0.891089	491.881	12.4752	268.035	26.9439	198.713	52.5743	179.008	110.143	152.018	157.376	256.526	-36.5204	352.737	101.326	312.72	-1.29061	384.151	-29.9849	438.446	-0.386397	492.418	13.3649	266.43	26.811	198.19	52.6814	178.595	110.307	150.787	158.936	8.36825	-1.19135	11.5068	3.30542	10.2014	-0.0421016	12.5316
		23	253	-41.5	350.036	94.5192	309.195	-8.13671	381.386	-31.6337	435.297	2.67327	488.762	20.0495	262.422	21.3306	196.931	52.1287	181.389	111.731	157.971	162.536	253.26	-41.5773	349.861	95.2672	309.396	-6.69324	382.565	-31.2947	434.817	1.83141	487.371	19.2572	263.259	21.8062	197.582	51.4124	181.919	110.765	157.988	160.952	8.26171	-1.35631	11.413	3.10776	10.093	-0.218344	12.4798
		24	250.5	-46.5	347.516	90.7384	305.623	-11.312	379.604	-32.5248	429.505	2.22772	480.297	24.505	259.054	16.8399	197.376	49.901	185.358	111.334	164.719	161.742	249.868	-46.8712	346.874	89.0898	306.058	-12.0256	380.484	-32.7046	430.705	3.21576	481.251	24.3928	260.029	16.6602	196.951	49.6287	185.333	110.202	165.27	161.836	8.15106	-1.52901	11.3156	2.90624	9.98408	-0.392291	12.412
		25	247	-52	343.105	81.9166	303.241	-17.2657	379.604	-33.4158	427.277	4.0099	474.059	28.5149	257.931	11.2266	197.376	46.7822	189.327	106.174	173.451	161.345	246.198	-52.4471	343.773	82.7332	302.749	-17.4069	378.023	-34.4333	426.137	4.08537	474.442	28.8509	256.793	11.3564	195.934	47.4951	188.654	108.76	172.462	161.74	8.03134	-1.7109	11.2144	2.69888	9.87613	-0.56784	12.3317
		26	242	-59	341.214	76.2455	299.272	-23.6163	374.703	-36.5347	420.149	3.11881	466.485	32.0792	253.441	6.17464	194.703	44.5545	191.709	106.968	179.802	159.361	242.273	-58.2356	340.675	76.4236	299.427	-22.8681	375.117	-36.6195	420.955	4.57728	467.167	32.7621	253.4	5.88435	194.313	45.2388	191.713	106.749	179.319	160.865	7.9033	-1.89973	11.1133	2.49305	9.76776	-0.745991	12.2369
		27	238	-64	336.803	69.3141	296.097	-27.9824	371.584	-40.5446	416.584	5.79208	460.693	36.0891	250.073	-0.561331	192.475	43.2178	194.487	105.777	186.152	159.757	238.32	-64.0876	337.611	70.2843	296.13	-28.4095	371.989	-39.1551	415.151	4.67231	459.467	36.148	249.905	0.231106	192.242	42.9011	194.495	103.965	185.821	159.229	7.77434	-2.09063	11.0134	2.29278	9.6602	-0.926761	12.1348
		28	233	-70	334.913	64.9032	293.319	-33.5391	368.465	-42.3267	408.564	3.56436	450	38.3168	246.143	-4.49064	188.465	40.5446	196.869	99.8236	191.312	157.376	234.529	-69.9979	334.65	64.2966	292.887	-34.17	368.835	-41.9339	408.675	4.07813	451.279	38.8521	246.447	-5.60268	190.061	40.3447	197.023	100.208	192.131	156.515	7.65069	-2.28344	10.9168	2.09745	9.55441	-1.11468	12.032
		29	232	-75.5	331.762	58.6019	288.159	-40.6836	365.792	-43.6634	402.327	3.11881	443.762	41.4356	242.214	-11.2266	187.574	37.8713	199.647	96.6483	197.663	153.804	230.918	-75.9851	331.724	58.245	289.734	-40.1977	365.715	-45.1838	401.756	2.64565	442.705	40.6353	243.189	-11.7173	188.094	37.4769	199.309	95.6847	198.469	152.49	7.53289	-2.47875	10.8213	1.90004	9.45157	-1.31131	11.9302
		30	228	-82	329.242	52.3006	287.762	-46.2404	362.228	-49.901	393.861	0.891089	434.406	42.3267	239.969	-18.5239	186.238	33.4158	200.044	88.71	204.41	146.262	227.197	-82.0354	328.781	52.0175	286.716	-46.4001	362.583	-49.2148	394.709	0.199133	433.688	41.1786	240.178	-17.9766	186.284	34.2911	201.347	90.6706	204.843	147.22	7.4115	-2.67612	10.7253	1.69689	9.35312	-1.51364	11.828
		31	223	-89	325.461	45.3692	284.19	-52.591	360	-53.0198	386.733	-3.56436	424.158	40.099	238.285	-24.1372	184.901	30.297	203.219	84.7409	210.364	140.309	223.283	-88.0227	325.818	45.634	283.602	-52.7507	359.372	-54.0519	387.924	-3.31916	424.378	40.3802	237.211	-24.1007	184.364	30.8323	203.129	85.5277	211.004	141.069	7.28381	-2.87143	10.6287	1.48865	9.25151	-1.72081	11.7232
		32	219.5	-93	322.31	39.0679	280.221	-59.3385	355.99	-59.703	382.277	-6.23762	415.248	37.8713	233.794	-30.3119	182.673	27.1782	204.807	81.9625	215.921	134.752	219.32	-93.8409	322.921	39.184	280.341	-59.205	355.973	-59.7311	381.565	-7.79628	415.137	38.4298	234.04	-29.9085	182.056	26.9379	204.369	80.1812	216.521	134.211	7.15454	-3.06123	10.5342	1.27824	9.14513	-1.93136	11.6124
		33	214	-100	321.05	32.7667	276.648	-65.6891	351.98	-66.3861	376.485	-13.3663	405.446	35.198	230.988	-36.4865	179.554	24.0594	204.807	74.0243	222.668	127.607	215.445	-99.5567	320.084	32.7063	277.071	-65.6806	352.402	-66.0908	375.515	-13.0473	406.325	35.4861	230.639	-35.2812	179.236	22.287	204.758	74.3665	220.762	126.622	7.02814	-3.24769	10.4416	1.06693	9.03849	-2.1426	11.4959
		34	213	-105	316.639	27.0955	273.87	-72.8335	349.752	-71.7327	368.465	-19.604	397.426	32.5248	227.62	-39.8545	175.545	16.4851	205.204	68.4675	224.653	118.082	211.738	-105.126	317.199	26.2015	273.913	-72.1171	348.69	-72.9209	369.806	-18.564	398.265	31.5485	227.005	-40.2626	175.972	16.6839	204.092	68.1613	223.027	118.419	6.90719	-3.42936	10.3475	0.854731	8.93546	-2.35257	11.3748
		35	208	-111	314.119	18.9038	270.695	-77.9934	344.406	-81.0891	364.01	-24.505	391.188	27.1782	222.568	-44.3451	172.426	9.80198	202.426	60.9261	224.256	110.143	208.029	-110.55	314.309	19.7282	270.879	-78.504	344.832	-80.0098	364.657	-23.8815	391.035	26.5741	223.238	-45.1709	172.412	10.3396	202.265	61.6837	223.11	109.949	6.78621	-3.60632	10.2532	0.643565	8.83649	-2.56092	11.2489
		36	203.5	-115.5	312.228	12.6026	268.313	-84.344	340.396	-88.2178	360	-29.8515	384.505	20.0495	219.2	-49.9584	168.416	4.0099	200.044	55.7663	221.08	99.8236	204.355	-115.854	311.375	13.5056	267.94	-84.9659	341.018	-86.9529	359.998	-28.8255	384.485	20.7609	219.556	-50.2529	168.628	3.48951	199.439	55.059	221.349	101.555	6.66637	-3.77933	10.1575	0.440573	8.74059	-2.77172	11.1245
		37	201.5	-121	307.818	8.19166	264.741	-92.2822	337.277	-93.1188	356.881	-32.0792	377.822	14.703	215.832	-55.5717	165.297	-4.0099	195.281	47.828	217.905	93.473	200.769	-121.136	308.333	7.56417	265.04	-91.5162	337.367	-93.596	355.538	-33.4812	378.451	14.4593	216.042	-55.5273	164.657	-3.73502	195.908	48.2977	218.419	93.5011	6.54938	-3.95165	10.0583	0.246754	8.64599	-2.98539	11.0054
		38	197	-126.5	305.297	1.89038	262.359	-97.839	334.158	-99.802	350.644	-38.3168	373.812	7.12871	213.025	-61.185	159.95	-11.5842	191.312	41.4774	213.539	86.3286	197.167	-126.434	305.27	1.71745	262.183	-98.041	333.824	-100.108	351.025	-38.1233	372.745	7.9061	212.645	-60.9012	160.526	-11.1302	192.08	41.5015	214.971	85.6708	6.43188	-4.12446	9.95836	0.0560258	8.5528	-3.19824	10.8899
[truncated: 198 more columns]

## Sheet: C0027
			RAW COORDINATES																				SPLINE																				mm
			HEAD		TAIL		LEFT COXAE		LEFT FT		LEFT TT		LEFT TIP		RIGHT COXAE		RIGHT FT		RIGHT TT		RIGHT TIP		HEAD		TAIL		LEFT COXAE		LEFT FT		LEFT TT		LEFT TIP		RIGHT COXAE		RIGHT FT		RIGHT TT		RIGHT TIP		HEAD		TAIL		LEFT COXAE		LEFT FT
SCALE		Frame	X	Y	X	Y	X	Y	X	Y	X	Y	X	Y	X	Y	X	Y	X	Y	X	Y	X	Y	X	Y	X	Y	X	Y	X	Y	X	Y	X	Y	X	Y	X	Y	X	Y	X	Y	X	Y	X	Y	X
X	Y	-2	698.576	131.913	852.327	202.277	737.376	125.198	691.025	90.6946	681.238	28.9604	667.426	-27.1782	715.099	165.297	658.082	151.422	601.04	163.96	545.792	171.089	698.512	131.959	852.003	202.169	736.506	124.954	690.532	91.6263	680.194	28.8465	666.06	-27.033	715.409	165.33	657.938	150.697	600.735	162.396	544.943	168.859	22.7865	4.30471	27.7936	6.59505	24.0259	4.07618	22.5262
592.327	125.941	-1	698.576	131.913	852.327	202.277	737.376	125.198	691.025	90.6946	681.238	28.9604	667.426	-27.1782	715.099	165.297	658.082	151.422	601.04	163.96	545.792	171.089	698.512	131.959	852.003	202.169	736.506	124.954	690.532	91.6263	680.194	28.8465	666.06	-27.033	715.409	165.33	657.938	150.697	600.735	162.396	544.943	168.859	22.7865	4.30471	27.7936	6.59505	24.0259	4.07618	22.5262
898.861	128.614	0	698.576	131.913	852.327	202.277	737.376	125.198	691.025	90.6946	681.238	28.9604	667.426	-27.1782	715.099	165.297	658.082	151.422	601.04	163.96	545.792	171.089	698.512	131.959	852.003	202.169	736.506	124.954	690.532	91.6263	680.194	28.8465	666.06	-27.033	715.409	165.33	657.938	150.697	600.735	162.396	544.943	168.859	22.7865	4.30471	27.7936	6.59505	24.0259	4.07618	22.5262
		1	698.576	131.913	852.327	202.277	737.376	125.198	691.025	90.6946	681.238	28.9604	667.426	-27.1782	715.099	165.297	658.082	151.422	601.04	163.96	545.792	171.089	698.512	131.959	852.003	202.169	736.506	124.954	690.532	91.6263	680.194	28.8465	666.06	-27.033	715.409	165.33	657.938	150.697	600.735	162.396	544.943	168.859	22.7865	4.30471	27.7936	6.59505	24.0259	4.07618	22.5262
DISTANCE (mm)		2	696.331	132.474	848.317	204.505	735.594	126.089	691.819	89.5039	686.584	25.8416	675.891	-28.9604	715.545	167.97	654.906	153.804	597.03	163.96	540	168.416	695.974	132.033	848.594	204.74	736.742	126.021	691.418	89.7722	686.313	26.0977	676.407	-29.7299	714.528	167.801	655.751	154.171	597.756	165.205	541.243	170.026	22.7037	4.30711	27.6824	6.67893	24.0336	4.11098	22.5551
pixel	mm	3	692.963	131.351	845.198	207.624	736.485	126.535	691.422	88.71	691.04	24.0594	685.693	-32.0792	712.426	169.307	654.112	156.582	594.356	167.525	537.772	171.089	693.479	132.116	845.281	207.335	737.212	127.175	692.497	87.5823	692.807	23.3734	687.194	-32.4328	713.599	170.269	653.565	157.874	594.84	168.482	537.763	171.868	22.6223	4.30981	27.5743	6.76359	24.0489	4.14865	22.5903
306.546	10	4	690.717	131.913	841.634	210.297	738.713	129.208	694.201	85.9316	699.95	20.9406	698.614	-36.0891	712.871	173.317	650.54	161.742	593.911	172.426	535.545	174.653	691.12	132.274	842.089	209.941	737.843	128.485	693.993	84.7239	700.01	20.6786	698.658	-34.9506	712.739	172.718	651.218	161.876	591.857	172.352	534.441	174.646	22.5454	4.31498	27.4702	6.84858	24.0695	4.19137	22.6391
1	0.0326215	5	689.033	133.035	838.96	211.634	738.267	129.208	696.582	81.1687	707.97	16.9307	711.089	-36.5347	711.98	175.545	648.556	166.902	587.673	176.881	529.752	177.772	688.871	132.404	838.987	212.616	738.382	129.914	695.916	81.1766	707.865	18.1759	710.657	-37.0325	711.862	174.953	648.589	165.922	588.641	176.655	531.205	178.349	22.472	4.31923	27.369	6.93585	24.0871	4.238	22.7018
		6	687.911	132.474	836.287	215.644	739.158	130.99	698.17	76.4057	715.545	16.9307	722.228	-38.7624	710.644	175.99	647.762	169.68	585	181.782	528.416	183.119	686.593	132.312	835.828	215.462	738.727	131.518	698.302	77.2613	716.205	16.0563	722.98	-38.64	710.853	176.894	645.427	169.708	585.413	181.206	528.158	182.891	22.3977	4.3162	27.266	7.02869	24.0984	4.29031	22.7797
LENGTH (mm)		7	683.42	131.913	832.723	217.871	738.267	133.663	699.757	73.6273	725.792	14.2574	736.04	-39.2079	710.644	178.663	642.602	173.252	582.772	185.347	526.634	188.465	684.236	131.935	832.463	218.386	738.821	133.199	701.345	73.3175	724.847	14.2899	735.468	-39.6928	709.617	178.581	641.571	173.147	582.267	185.908	525.145	188.068	22.3208	4.3039	27.1562	7.12409	24.1015	4.34515	22.8789
Body	4.92714	8	681.736	131.351	829.158	222.327	738.713	135	705.314	69.6582	733.366	12.9208	748.069	-40.9901	707.525	180	635.458	176.428	578.317	191.139	521.287	194.703	682.016	131.284	828.859	221.252	738.672	134.726	705.154	69.5053	733.515	12.9743	747.847	-40.0821	708.08	179.885	637.452	176.207	579.177	190.779	522.072	193.718	22.2484	4.28268	27.0386	7.21756	24.0966	4.39495	23.0032
R. Femur	2.41436	9	680.052	130.229	823.812	223.663	738.267	135.891	710.077	65.2922	742.277	11.5842	759.208	-40.099	705.743	181.337	632.679	178.809	576.98	196.04	519.505	199.158	680.019	130.379	825.089	223.875	738.185	135.958	709.476	66.0157	742.104	12.2468	759.945	-39.6471	706.357	180.651	633.757	178.89	576.158	195.761	519.159	199.837	22.1832	4.25314	26.9156	7.30313	24.0807	4.43515	23.1442
R. Tibia	1.56429	10	677.245	129.106	821.139	225.446	737.822	136.782	713.649	62.9107	750.297	11.5842	773.465	-38.3168	704.851	180.891	629.901	181.985	573.861	200.495	516.386	205.396	678.224	129.243	821.233	226.277	737.249	136.842	714.041	63.0514	750.541	12.1923	771.63	-38.4332	704.461	180.792	630.713	181.254	573.104	200.861	516.548	206.635	22.1247	4.21611	26.7898	7.38149	24.0502	4.46399	23.2931
R. Tarsus	1.63136	11	677.245	127.983	818.02	229.01	735.594	138.119	719.206	60.1323	759.208	12.9208	781.485	-36.0891	703.069	180	627.519	183.572	569.851	205.842	514.158	214.752	676.545	127.864	817.093	228.446	735.805	137.321	718.7	60.6495	758.767	12.7063	782.718	-36.635	702.254	180.394	628.139	183.388	570.092	206.15	514.408	214.146	22.0699	4.17111	26.6548	7.45224	24.0031	4.47962	23.4451
L. Femur	2.31607	12	675	126.299	813.119	229.901	733.812	136.782	723.175	59.3385	766.337	15.1485	794.406	-33.4158	698.614	180	627.519	183.969	567.178	212.079	512.376	222.772	674.712	126.194	812.427	230.197	733.919	137.365	723.28	58.744	766.705	13.5186	793.337	-34.415	699.698	179.579	625.569	185.558	567.406	211.615	512.875	222.122	22.0101	4.11663	26.5026	7.50938	23.9415	4.48107	23.5945
L. Tibia	1.80939	13	672.193	124.054	806.881	231.683	732.03	136.782	727.541	57.3539	773.465	15.5941	803.317	-31.6337	696.832	177.772	624.344	187.541	565.842	216.98	512.376	230.347	672.579	124.211	807.241	231.414	731.637	137.093	727.694	57.176	774.341	14.4669	803.494	-31.7463	696.903	178.412	622.464	188.022	565.305	217.177	511.991	230.416	21.9405	4.05196	26.3334	7.54906	23.8671	4.47217	23.7385
L. Tarsus	1.71446	14	670.509	121.809	801.089	232.574	728.465	136.782	732.304	55.3693	782.376	14.2574	811.782	-28.9604	694.604	176.436	618.787	191.114	561.832	222.327	511.931	238.812	670.08	121.917	801.732	231.956	728.987	136.514	731.852	55.9037	781.555	15.8398	813.363	-28.3355	693.773	176.992	618.8	190.656	564.013	222.834	511.692	239.063	21.859	3.97713	26.1537	7.56674	23.7806	4.4533	23.8741
		15	667.141	119.563	797.079	231.238	726.238	135.446	735.48	55.3693	789.059	16.4851	823.366	-24.505	690.149	175.99	613.627	193.892	563.614	229.01	511.931	248.168	667.106	119.276	796.017	231.765	726.054	135.552	735.648	54.9296	788.05	18.1871	823.048	-23.8416	690.182	175.265	615.097	193.16	563.738	228.535	511.984	248.102	21.762	3.89097	25.9673	7.56052	23.685	4.42191	23.9979
mg	9	16	664.335	116.757	789.505	230.792	722.673	134.109	739.052	54.1786	793.069	21.8317	831.832	-19.604	686.139	173.317	611.246	195.083	564.95	234.802	513.713	255.743	663.624	116.234	790.108	230.91	722.837	134.165	739.064	54.1687	793.726	21.6627	832.297	-18.0987	686.187	173.055	611.897	195.356	564.214	234.132	512.95	257.519	21.6484	3.79174	25.7745	7.53263	23.58	4.37667	24.1094
		17	658.721	112.266	783.713	230.347	719.109	132.327	742.227	53.7817	798.416	26.2871	841.188	-9.35644	681.683	170.644	610.055	196.67	566.287	238.366	514.158	267.327	659.673	112.828	784.185	229.367	719.335	132.301	742.065	53.6072	798.722	25.9489	840.815	-11.2149	681.884	170.333	609.365	197.243	565.061	239.593	514.719	267.194	21.5195	3.68063	25.5813	7.48231	23.4658	4.31586	24.2073
		18	655.353	108.898	778.812	226.337	715.99	130.545	744.212	52.591	801.98	32.0792	848.762	-3.11881	677.228	166.634	605.292	199.449	566.287	245.05	517.723	278.02	655.406	109.199	778.329	227.112	715.509	129.889	744.615	53.2686	803.07	30.6889	848.239	-3.57521	677.345	167.193	607.473	198.766	566.131	244.997	517.556	276.616	21.3803	3.56222	25.3902	7.40873	23.341	4.23719	24.2905
		19	650.863	105.53	772.129	224.109	710.644	126.98	746.99	53.3848	807.772	34.3069	854.554	3.56436	672.327	163.515	606.88	200.639	567.178	249.95	520.842	285.149	650.793	105.37	772.5	224.292	711.286	126.9	746.693	53.1781	806.628	35.6927	854.294	4.80155	672.583	163.779	606.188	199.763	567.611	250.182	521.653	285.278	21.2298	3.43732	25.2001	7.31676	23.2032	4.13967	24.3582
		20	646.372	101.601	766.782	220.99	707.525	122.525	747.387	52.9879	810	40.9901	859.01	12.9208	668.317	160.842	606.086	199.052	568.515	254.851	527.525	293.168	645.741	101.274	766.724	220.925	706.654	123.459	748.207	53.2275	809.055	41.0294	858.864	14.037	667.562	160.113	605.056	200.246	569.768	254.917	527.162	292.999	21.065	3.30371	25.0117	7.2069	23.0521	4.02741	24.4076
		21	640.198	96.5489	760.545	217.426	701.287	119.851	750.165	53.3848	809.109	46.7822	861.238	24.0594	662.079	155.495	604.101	200.639	573.416	258.861	531.98	298.96	640.208	96.8817	760.974	216.943	701.529	119.695	749.069	53.3034	810.262	46.5274	861.93	23.9311	662.22	156.163	603.717	200.399	572.706	258.915	534.079	299.657	20.8846	3.16043	24.8241	7.077	22.8849	3.90462	24.4357
		22	634.023	92.6195	755.644	212.525	695.941	115.842	748.181	53.7817	810	52.1287	864.356	34.7525	656.287	151.931	602.117	199.449	575.644	261.535	541.782	306.089	634.3	92.2288	755.187	212.312	695.979	115.535	749.078	53.2538	810.38	51.9414	863.48	33.9643	656.649	152.013	602.108	200.196	576.257	261.859	542.317	305.122	20.6918	3.00864	24.6353	6.92593	22.7039	3.76893	24.436
		23	627.287	87.0062	749.406	206.733	690.149	110.941	748.975	52.9879	810	57.0297	863.02	44.5545	650.941	147.921	600.132	200.243	580.099	265.099	552.921	308.317	628.138	87.3156	749.233	207.124	690.061	110.909	748.188	52.962	809.303	57.0932	863.404	43.6274	650.928	147.63	600.314	199.554	580.312	263.396	551.296	309.17	20.4908	2.84836	24.4411	6.75669	22.5108	3.618	24.407
		24	622.796	81.9543	743.614	201.386	683.911	106.485	746.196	51.7971	808.218	61.9307	861.683	53.4653	645.594	143.02	598.545	198.655	584.554	265.099	560.941	313.218	621.733	82.1954	743.072	201.526	683.817	105.824	746.256	52.4385	806.816	61.8581	861.73	52.6527	645.05	142.94	598.433	198.273	584.647	263.194	560.287	311.708	20.2819	2.68134	24.2401	6.57406	22.3071	3.45213	24.344
		25	615.499	77.4636	736.485	196.04	677.228	99.802	743.815	51.4002	801.535	65.9406	858.119	59.2574	638.465	138.119	595.766	197.067	589.455	259.752	569.406	311.436	614.946	76.8592	736.761	195.577	677.311	100.352	743.263	51.6934	802.919	66.1122	858.447	61.077	639.016	137.935	596.529	196.29	588.949	261.402	568.941	312.591	20.0605	2.50726	24.0342	6.38002	22.0949	3.27364	24.2463
		26	607.079	71.289	730.248	188.911	670.545	94.0099	739.846	51.4002	798.416	69.9505	855.891	69.0594	632.673	132.772	594.576	193.098	593.465	257.525	576.98	312.772	607.862	71.2593	730.476	189.312	670.628	94.6884	739.253	50.5741	797.898	69.7344	853.492	69.0721	632.925	132.654	594.638	193.712	592.901	258.608	577.18	311.905	19.8294	2.32459	23.8292	6.17564	21.8769	3.08888	24.1155
		27	600.904	65.6757	723.564	182.673	663.861	89.5545	733.098	49.4157	791.287	73.0693	846.535	77.5248	627.327	126.535	593.385	190.32	596.584	254.851	585.446	310.099	600.711	65.475	724.345	182.837	663.835	88.8986	734.427	48.8716	791.828	72.5811	846.859	76.4384	626.765	127.189	592.622	190.814	596.331	255.069	585.054	309.608	19.5961	2.13589	23.6292	5.96443	21.6553	2.90001	23.9581
		28	592.484	58.9397	718.663	176.436	657.178	83.3168	729.923	46.6373	785.941	74.4059	838.515	83.7624	620.198	121.634	590.209	187.938	599.257	251.733	592.574	305.644	593.587	59.6379	718.387	176.187	656.977	82.8999	729.081	46.5805	784.795	74.576	839.058	82.9311	620.467	121.632	590.331	187.743	599.236	250.688	592.622	305.816	19.3637	1.94548	23.4349	5.74748	21.4316	2.70432	23.7837
		29	587.432	53.8877	712.871	169.752	649.604	76.1881	723.175	43.462	776.584	76.6337	829.158	89.1089	614.406	116.287	587.828	184.366	601.931	246.386	600.149	300.743	586.517	53.888	712.442	169.347	650.112	76.7447	723.283	43.871	776.854	75.7578	830.629	88.6017	614.061	115.932	587.778	184.51	601.707	245.315	600.013	300.8	19.1331	1.75791	23.2409	5.52435	21.2076	2.50353	23.5946
		30	579.574	48.2744	706.634	161.733	643.366	70.396	716.825	41.0805	768.564	76.6337	823.366	92.2277	607.277	110.495	585.447	181.588	603.713	238.812	606.386	296.287	579.342	48.2162	706.395	162.375	643.317	70.587	717.215	40.9341	768.279	76.2042	821.886	93.7838	607.567	110.021	584.995	181.136	603.869	239.086	607.381	294.815	18.899	1.57288	23.0436	5.29692	20.986	2.30265	23.3966
		31	571.715	42.6611	699.95	155.495	636.683	64.604	710.871	37.5083	758.317	74.8515	811.782	98.9109	601.04	103.366	581.477	177.222	605.495	231.238	615.297	286.04	572.061	42.5767	700.255	155.399	636.565	64.4659	711.059	37.8782	759.36	76.2084	812.857	98.8855	601.052	103.94	582.043	177.642	605.887	232.432	614.846	288.179	18.6615	1.38892	22.8434	5.06936	20.7657	2.10297	23.1958
[truncated: 198 more columns]

[truncated: 11 more sheets: C0028, C0032, C0036, C0041, C0045, C0079, C0085, C0114, C0119, C0124, C0125]
